# Supplementary material for: Transition-metal-free decarbonylative alkylation towards N-aryl α-hydroxy amides via triple C–C bond cleavages and their selective deuteration
Source: Royal Society of Chemistry journal article supplement (doi:10.1039/d1qo00530h), 2021-01-01

## *Supporting Information*

# **Transition-metal-free Decarbonylative Alkylation of *N*-Aryl $\alpha$ -Hydroxy Amides via Triple C-C Bond Cleavages and Their Selective Deuteration**

Chengyu Sun,<sup>‡[a]</sup> Yang Yu,<sup>‡[a]</sup> Xiao Zhang,<sup>[a]</sup> Yonghai Liu,<sup>[a]</sup> Chengtao Sun,<sup>[b]</sup>  
Guoyin Kai,<sup>[b]</sup> Lei Shi<sup>[c]</sup> and Hao Li<sup>\*[a]</sup>

*[a]State Key Laboratory of Bioreactor Engineering, Shanghai Key Laboratory of  
New Drug Design, and School of Pharmacy, East China University of Science and  
Technology, 130 Mei-long Road, Shanghai, 200237, China*

*[b]Laboratory of Medicinal Plant Biotechnology, College of pharmacy, Zhejiang  
Chinese Medical University, Hangzhou, Zhejiang, 310053, China.*

*[c] Huabao Flavours & Fragrances Co., Ltd., 1299 Yecheng Road, Shanghai 201822,  
China..*

<sup>‡</sup> *These authors contributed equally to this work.*

## **Table of contents**

|              |                                                                                                           |            |
|--------------|-----------------------------------------------------------------------------------------------------------|------------|
| <b>I.</b>    | <b>General Information.....</b>                                                                           | <b>S2</b>  |
| <b>II.</b>   | <b>General procedure for the preparation of substrates.....</b>                                           | <b>S3</b>  |
| <b>III.</b>  | <b>Optimization of multiple C-C bond cleavage conditions by employing 1a or 1b as<br/>substrates.....</b> | <b>S24</b> |
| <b>IV.</b>   | <b>Synthesis of <math>\alpha</math>-hydroxy acylamide via C-C bond cleavages.....</b>                     | <b>S26</b> |
| <b>V.</b>    | <b>Synthesis of deuterated <math>\alpha</math>-hydroxy acylamide via C-C bond cleavages.....</b>          | <b>S32</b> |
| <b>VI.</b>   | <b>Mechanistic Study.....</b>                                                                             | <b>S35</b> |
| <b>VII.</b>  | <b>X-ray structure of 1b.....</b>                                                                         | <b>S42</b> |
| <b>VIII.</b> | <b>Reference.....</b>                                                                                     | <b>S50</b> |
| <b>IX.</b>   | <b><sup>1</sup>H and <sup>13</sup>C-NMR Spectra Data .....</b>                                            | <b>S51</b> |

## 1. General Information

Unless otherwise noted, all reagents were obtained commercially and used without further purification. Unless otherwise specified, all other reagents were purchased from Acros, Aldrich, Fisher, Adamas-beta Co. Ltd. or TCI and used without further purification.  $^1\text{H}$  NMR spectra was recorded at 400 MHz and 600MHz,  $^{13}\text{C}$  NMR spectra was recorded at 100 MHz and 150MHz.  $^1\text{H}$  NMR spectra was recorded with tetramethylsilane ( $\delta$  0.00 ppm) as internal reference;  $^{13}\text{C}$  NMR spectra was recorded with  $\text{CDCl}_3$  ( $\delta$  77.00 ppm) as internal reference. Chemical shifts were reported in parts per million (ppm,  $\delta$ ) downfield from tetramethylsilane. Proton coupling patterns are described as singlet (s), doublet (d), triplet (t), quartet (q), multiplet (m), and broad (br). Chromatography was carried out with silica gel (200-300 mesh) using mixtures of petroleum ether (b.p. 60-80 °C) and ethyl acetate as eluents. Mass Spectra were obtained from the mass spectrometry facility of East China University of Science and Technology.

## 2. General procedure for the preparation of substrates

### 2.1. General procedure for the synthesis of $\alpha$ -alkyl 1,3-dicarbonyl (**3b** as an example):

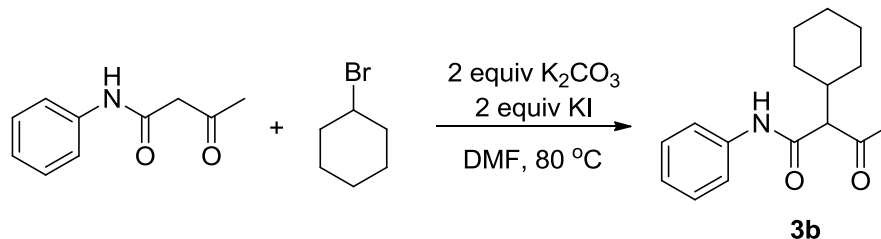

To a solution of 3-oxo-*N*-phenylbutanamide (885 mg, 5 mmol) in 20 mL of DMF, potassium carbonate (1.38 g, 10 mmol) and potassium iodide (1.66 g, 10 mmol) was added. After the solution was stirred for 5 min, bromocyclohexane (978 mg, 6 mmol) was added dropwise. The resulting solution was stirred at 80 °C for 12 h. After the completion of the reaction monitored by TLC. 50 mL  $CH_2Cl_2$  was added and the solution was extracted with water (50 mL  $\times$  3). The organic layer was washed with saturated brine, then dried over sodium sulfate. The solvent was removed under reduced pressure. The obtained residue was purified by column chromatography to give the compound as white solid (582 mg, 45%).

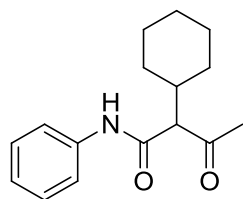

**2-Cyclohexyl-3-oxo-*N*-phenylbutanamide (3b)** white solid, purification by flash column chromatography (eluent: Petroleum ether/EtOAc = 15/1), 582 mg (45% yield).  $^1H$  NMR (600 MHz,  $CDCl_3$ ):  $\delta$  8.38 (brs, 1H), 7.53 (d,  $J$  = 7.8 Hz, 2H), 7.31 (t,  $J$  = 7.8 Hz, 2H), 7.10 (t,  $J$  = 7.8 Hz, 1H), 3.37 (d,  $J$  = 10.2 Hz, 1H), 2.32 (s, 3H), 2.08-2.06 (m, 1H), 1.79-1.64 (m, 5H), 1.29-1.07 (m, 5H) ppm.  $^{13}C$  NMR (150 MHz,  $CDCl_3$ ):  $\delta$  209.3, 165.8, 137.6, 129.0, 124.5, 120.0, 68.9, 41.3, 31.8, 31.4, 30.7, 25.9, 25.8, 25.7 ppm. HRMS (ESI)  $m/z$ :  $[M + Na]^+$  Calcd for  $C_{16}H_{21}NNaO_2$  282.1470; Found 282.1469.

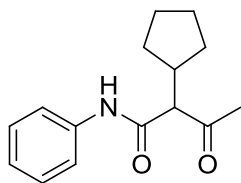

**2-Cyclopentyl-3-oxo-N-phenylbutanamide (3c)** white solid, purification by flash column chromatography (eluent: Petroleum ether/EtOAc = 15/1), 515 mg (42% yield).  $^1\text{H}$  NMR (600 MHz,  $\text{CDCl}_3$ ):  $\delta$  8.32 (brs, 1H), 7.52 (d,  $J = 7.8$  Hz, 2H), 7.31 (t,  $J = 7.8$  Hz, 2H), 7.10 (t,  $J = 7.8$  Hz, 1H), 3.36 (d,  $J = 10.2$  Hz, 1H), 2.48-2.42 (m, 1H), 2.38 (s, 3H), 1.88-1.76 (m, 2H), 1.70-1.53 (m, 4H), 1.38-1.31 (m, 1H), 1.21-1.45 (m, 1H) ppm.  $^{13}\text{C}$  NMR (150 MHz,  $\text{CDCl}_3$ ):  $\delta$  208.6, 166.3, 137.6, 129.0, 124.5, 120.0, 68.0, 42.9, 30.9, 30.8, 30.7, 24.8, 24.3 ppm. HRMS (ESI)  $m/z$ :  $[\text{M} + \text{Na}]^+$  Calcd for  $\text{C}_{15}\text{H}_{19}\text{NNaO}_2$  268.1313; Found 268.1312.

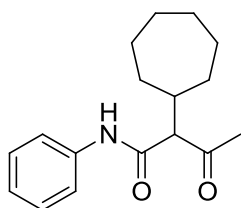

**2-Cycloheptyl-3-oxo-N-phenylbutanamide (3d)** white solid, purification by flash column chromatography (eluent: Petroleum ether/EtOAc = 15/1), 532 mg (39% yield).  $^1\text{H}$  NMR (600 MHz,  $\text{CDCl}_3$ ):  $\delta$  8.44 (brs, 1H), 7.52 (d,  $J = 7.8$  Hz, 2H), 7.30 (t,  $J = 7.8$  Hz, 2H), 7.10 (t,  $J = 7.8$  Hz, 1H), 3.41 (d,  $J = 10.2$  Hz, 1H), 2.31 (s, 3H), 1.94-1.78 (m, 2H), 1.64-1.42 (m, 9H), 1.34-1.24 (m, 2H) ppm.  $^{13}\text{C}$  NMR (150 MHz,  $\text{CDCl}_3$ ):  $\delta$  208.8, 166.2, 137.7, 129.0, 124.5, 120.0, 69.4, 42.1, 32.5, 31.8, 30.8, 28.1, 28.0, 27.9, 26.1, 26.0 ppm. HRMS (ESI)  $m/z$ :  $[\text{M} + \text{Na}]^+$  Calcd for  $\text{C}_{17}\text{H}_{23}\text{NNaO}_2$  296.1626; Found 296.1628.

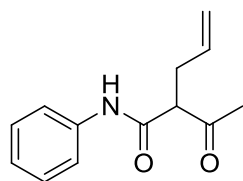

**2-Acetyl-N-phenylpent-4-enamide (3e)** white solid, purification by flash column chromatography (eluent: Petroleum ether/EtOAc = 8/1), 575 mg (53% yield).  $^1\text{H}$  NMR (600 MHz,  $\text{CDCl}_3$ ):  $\delta$  8.53 (brs, 1H), 7.50 (d,  $J = 7.2$  Hz, 1H), 7.30 (t,  $J = 7.2$  Hz, 2H), 7.11 (d,  $J = 7.2$  Hz, 1H), 5.79-5.72 (m, 1H), 5.15-5.08 (m, 2H), 3.59 (t,  $J = 7.2$  Hz, 1H), 2.73-2.26 (m, 2H), 2.28 (s, 3H) ppm.  $^{13}\text{C}$  NMR (150 MHz,  $\text{CDCl}_3$ ):  $\delta$  207.0, 166.4, 137.5, 133.6, 129.0, 124.7, 120.2, 118.2, 64.2, 34.6, 29.7 ppm. HRMS (ESI)  $m/z$ :  $[\text{M} + \text{Na}]^+$  Calcd for  $\text{C}_{13}\text{H}_{15}\text{NNaO}_2$  240.1000; Found 240.1002.

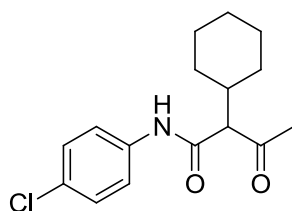

**N-(4-Chlorophenyl)-2-cyclohexyl-3-oxobutanamide (3f)** white solid, purification by flash column chromatography (eluent: Petroleum ether/EtOAc = 15/1), 688 mg (47% yield).  $^1\text{H}$  NMR (600 MHz,  $\text{CDCl}_3$ ):  $\delta$  8.46 (brs, 1H), 7.49-7.47 (m, 2H), 7.28-7.26 (m, 2H), 3.37 (d,  $J = 9.6$  Hz, 1H), 2.32 (s, 3H), 2.07-2.01 (m, 1H), 1.78-1.73 (m, 2H), 1.66-1.65 (m, 2H), 1.30-1.06 (m, 6H) ppm.  $^{13}\text{C}$  NMR (150 MHz,  $\text{CDCl}_3$ ):  $\delta$  209.5, 165.8, 136.2, 129.4, 129.0, 121.1, 68.6, 41.5, 32.0, 31.4, 30.6, 26.0, 25.9, 25.8 ppm. HRMS (ESI)  $m/z$ :  $[\text{M} + \text{Na}]^+$  Calcd for  $\text{C}_{16}\text{H}_{20}\text{ClNNaO}_2$  316.1080; Found 316.1082.

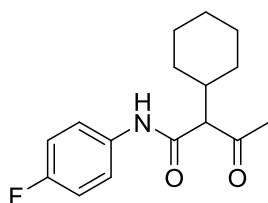

**2-Cyclohexyl-N-(4-fluorophenyl)-3-oxobutanamide (3g)** white solid, purification by flash column chromatography (eluent: Petroleum ether/EtOAc = 15/1), 720 mg (52%

yield).  $^1\text{H}$  NMR (600 MHz,  $\text{CDCl}_3$ ):  $\delta$  8.45 (brs, 1H), 7.50-7.47 (m, 2H), 7.02-6.99 (m, 2H), 3.37 (d,  $J = 9.6$  Hz, 1H), 2.32 (s, 3H), 2.07-2.05 (m, 2H), 1.77-1.65 (m, 4H), 1.30-1.07 (m, 5H) ppm.  $^{13}\text{C}$  NMR (150 MHz,  $\text{CDCl}_3$ ):  $\delta$  209.4, 165.8, 159.4 (d,  $J_{\text{C-F}} = 242.5$  Hz), 133.6 (d,  $J_{\text{C-F}} = 3.3$  Hz), 121.7 (d,  $J_{\text{C-F}} = 7.9$  Hz), 115.6 (d,  $J_{\text{C-F}} = 22.4$  Hz), 68.6, 41.3, 31.8, 31.3, 30.6, 25.9, 25.8, 25.7 ppm. HRMS (ESI)  $m/z$ :  $[\text{M} + \text{Na}]^+$  Calcd for  $\text{C}_{16}\text{H}_{20}\text{FNNaO}_2$  300.1376; Found 300.1375.

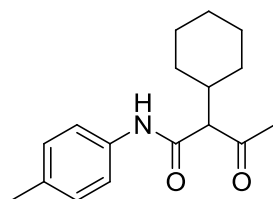

**2-Cyclohexyl-3-oxo-N-(p-tolyl)butanamide (3h)** white solid, purification by flash column chromatography (eluent: Petroleum ether/EtOAc = 15/1), 628 mg (46% yield).  $^1\text{H}$  NMR (600 MHz,  $\text{CDCl}_3$ ):  $\delta$  8.13 (brs, 1H), 7.32 (d,  $J = 8.4$  Hz, 2H), 7.04 (d,  $J = 8.4$  Hz, 2H), 3.28 (d,  $J = 10.2$  Hz, 1H), 2.24-2.23 (m, 6H), 2.00-1.97 (m, 1H), 1.67-1.57 (m, 4H), 1.25-1.07 (m, 6H) ppm.  $^{13}\text{C}$  NMR (150 MHz,  $\text{CDCl}_3$ ):  $\delta$  209.3, 165.6, 135.0, 134.1, 129.5, 120.0, 68.9, 41.3, 31.8, 31.4, 30.6, 26.0, 25.9, 25.8, 20.9 ppm. HRMS (ESI)  $m/z$ :  $[\text{M} + \text{Na}]^+$  Calcd for  $\text{C}_{17}\text{H}_{23}\text{NNaO}_2$  296.1626; Found 296.1625.

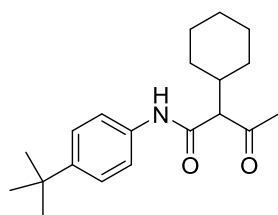

**N-(4-(tert-Butyl)phenyl)-2-cyclohexyl-3-oxobutanamide (3i)** white solid, purification by flash column chromatography (eluent: Petroleum ether/EtOAc = 15/1), 677 mg (43% yield).  $^1\text{H}$  NMR (400 MHz,  $\text{CDCl}_3$ ):  $\delta$  8.47 (brs, 1H), 7.46 (d,  $J = 8.4$  Hz, 2H), 7.32 (d,  $J = 8.4$  Hz, 2H), 3.33 (d,  $J = 10.0$  Hz, 1H), 2.30 (s, 3H), 2.11-2.03 (m, 1H), 1.80-1.64 (m, 4H), 1.29-1.02 (m, 15H) ppm.  $^{13}\text{C}$  NMR (100 MHz,  $\text{CDCl}_3$ ):  $\delta$  209.1, 165.9, 147.5, 135.0, 125.8, 119.7, 69.0, 40.9, 34.4, 31.4, 31.3, 31.2, 30.6, 25.9, 25.8

ppm. HRMS (ESI)  $m/z$ :  $[M + Na]^+$  Calcd for  $C_{20}H_{29}NNaO_2$  338.2096; Found 338.2094.

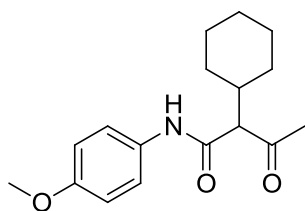

**2-Cyclohexyl-*N*-(4-methoxyphenyl)-3-oxobutanamide (3j)** white solid, purification by flash column chromatography (eluent: Petroleum ether/EtOAc = 15/1), 723 mg (50% yield).  $^1H$  NMR (600 MHz,  $CDCl_3$ ):  $\delta$  8.35 (brs, 1H), 7.42 (d,  $J = 9.0$  Hz, 2H), 6.84 (d,  $J = 9.0$  Hz, 2H), 3.77 (s, 3H), 3.33 (d,  $J = 9.6$  Hz, 1H), 2.31 (s, 3H), 2.11-2.07 (m, 1H), 1.81-1.63 (m, 4H), 128-1.04 (m, 6H) ppm.  $^{13}C$  NMR (150 MHz,  $CDCl_3$ ):  $\delta$  209.1, 165.7, 156.5, 130.8, 121.7, 114.1, 68.9, 55.5, 40.9, 31.3, 30.7, 25.9, 25.8 ppm. HRMS (ESI)  $m/z$ :  $[M + Na]^+$  Calcd for  $C_{17}H_{23}NNaO_3$  312.1576; Found 312.1577.

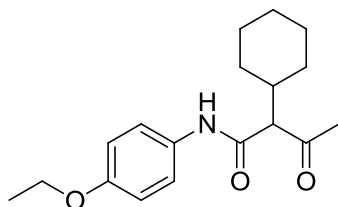

**2-Cyclohexyl-*N*-(4-ethoxyphenyl)-3-oxobutanamide (3k)** white solid, purification by flash column chromatography (eluent: Petroleum ether/EtOAc = 15/1), 636 mg (42% yield).  $^1H$  NMR (600 MHz,  $CDCl_3$ ):  $\delta$  8.15 (brs, 1H), 7.41-7.39 (m, 2H), 6.85-6.83 (m, 2H), 4.00 (q,  $J = 7.2$  Hz, 2H), 3.34 (d,  $J = 9.6$  Hz, 1H), 2.31 (s, 3H), 2.08-2.02 (m, 1H), 1.75-1.65 (m, 4H), 1.39 (t,  $J = 7.2$  Hz, 3H), 1.34-1.05 (m, 6H) ppm.  $^{13}C$  NMR (150 MHz,  $CDCl_3$ ):  $\delta$  209.4, 165.5, 155.9, 130.6, 121.6, 114.8, 68.8, 63.7, 41.3, 31.8, 31.4, 30.6, 26.0, 25.9, 25.8, 14.8 ppm. HRMS (ESI)  $m/z$ :  $[M + Na]^+$  Calcd for  $C_{18}H_{25}NNaO_3$  326.1732; Found 326.1734.

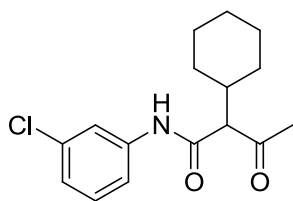

***N*-(3-Chlorophenyl)-2-cyclohexyl-3-oxobutanamide (3l)** white solid, purification by flash column chromatography (eluent: Petroleum ether/EtOAc = 15/1), 702 mg (48% yield).  $^1\text{H}$  NMR (600 MHz,  $\text{CDCl}_3$ ):  $\delta$  8.43 (brs, 1H), 7.67 (t,  $J = 1.8$  Hz, 1H), 7.34 (dd,  $J_1 = 8.4$  Hz,  $J_2 = 1.2$  Hz, 1H), 7.23 (t,  $J = 7.8$  Hz, 1H), 7.09-7.04 (m, 1H), 3.39 (d,  $J = 9.6$  Hz, 1H), 2.33 (s, 3H), 2.05-2.00 (m, 1H), 1.75-1.64 (m, 4H), 1.30-1.07 (m, 6H) ppm.  $^{13}\text{C}$  NMR (150 MHz,  $\text{CDCl}_3$ ):  $\delta$  209.6, 165.8, 138.7, 134.7, 130.0, 124.5, 120.0, 117.8, 68.5, 41.7, 32.3, 31.4, 30.6, 26.0, 25.9, 25.8 ppm. HRMS (ESI)  $m/z$ :  $[\text{M} + \text{Na}]^+$  Calcd for  $\text{C}_{16}\text{H}_{20}\text{ClNNaO}_2$  316.1080; Found 316.1078.

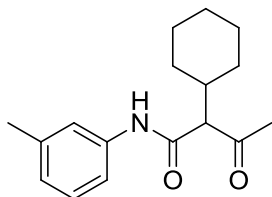

**2-Cyclohexyl-3-oxo-*N*-(*m*-tolyl)butanamide (3m)** white solid, purification by flash column chromatography (eluent: Petroleum ether/EtOAc = 15/1), 628 mg (46% yield).  $^1\text{H}$  NMR (600 MHz,  $\text{CDCl}_3$ ):  $\delta$  8.27 (brs, 1H), 7.38 (s, 1H), 7.30 (d,  $J = 7.8$  Hz, 1H), 7.19 (t,  $J = 7.8$  Hz, 1H), 6.92 (d,  $J = 7.2$  Hz, 1H), 3.36 (d,  $J = 9.6$  Hz, 1H), 2.33 (s, 3H), 2.31 (s, 3H), 2.07-2.05 (m, 1H), 1.75-1.65 (m, 4H), 1.28-1.07 (m, 6H) ppm.  $^{13}\text{C}$  NMR (150 MHz,  $\text{CDCl}_3$ ):  $\delta$  209.3, 165.7, 139.0, 137.5, 128.8, 125.3, 120.5, 116.9, 69.0, 41.3, 31.8, 31.4, 30.6, 26.0, 25.9, 25.8, 21.5 ppm. HRMS (ESI)  $m/z$ :  $[\text{M} + \text{Na}]^+$  Calcd for  $\text{C}_{17}\text{H}_{23}\text{NNaO}_2$  296.1626; Found 296.1628.



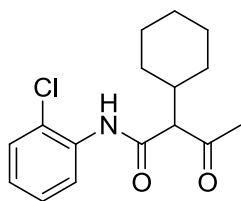

***N*-(2-Chlorophenyl)-2-cyclohexyl-3-oxobutanamide (3n)** white solid, purification by flash column chromatography (eluent: Petroleum ether/EtOAc = 15/1), 731 mg (50% yield). <sup>1</sup>H NMR (600 MHz, CDCl<sub>3</sub>): δ 8.83 (brs, 1H), 8.29 (dd, *J*<sub>1</sub> = 7.8 Hz, *J*<sub>2</sub> = 1.2 Hz, 1H), 7.37 (dd, *J*<sub>1</sub> = 7.8 Hz, *J*<sub>2</sub> = 1.2 Hz, 1H), 7.26-7.24 (m, 1H), 7.06-7.04 (m, 1H), 3.43 (d, *J* = 9.6 Hz, 1H), 2.40 (s, 3H), 2.11-2.05 (m, 1H), 1.76-1.63 (m, 4H), 1.33-1.08 (m, 6H) ppm. <sup>13</sup>C NMR (150 MHz, CDCl<sub>3</sub>): δ 208.7, 165.9, 134.4, 129.1, 127.6, 124.9, 123.5, 121.7, 68.8, 41.7, 32.3, 31.4, 30.6, 26.0, 25.9, 25.8 ppm. HRMS (ESI) *m/z*: [M + Na]<sup>+</sup> Calcd for C<sub>16</sub>H<sub>20</sub>ClNNaO<sub>2</sub> 316.1080; Found 316.1079.

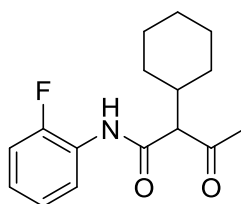

**2-Cyclohexyl-*N*-(2-fluorophenyl)-3-oxobutanamide (3o)** white solid, purification by flash column chromatography (eluent: Petroleum ether/EtOAc = 15/1), 734 mg (53% yield). <sup>1</sup>H NMR (600 MHz, CDCl<sub>3</sub>): δ 8.56 (brs, 1H), 8.25-8.22 (m, 1H), 7.12-7.04 (m, 3H), 3.41 (d, *J* = 9.6 Hz, 1H), 2.33 (s, 3H), 2.10-2.05 (m, 1H), 1.80-1.65 (m, 5H), 1.30-1.08 (m, 5H) ppm. <sup>13</sup>C NMR (150 MHz, CDCl<sub>3</sub>): δ 208.7, 165.9, 152.8 (d, *J*<sub>C-F</sub> = 242.9 Hz), 126.0 (d, *J*<sub>C-F</sub> = 10.4 Hz), 125.0 (d, *J*<sub>C-F</sub> = 7.8 Hz), 124.5 (d, *J*<sub>C-F</sub> = 4.1 Hz), 121.8, 115.0 (d, *J*<sub>C-F</sub> = 19.2 Hz), 68.7, 41.5, 32.0, 31.4, 30.6, 25.9, 25.8, 25.7 ppm. HRMS (ESI) *m/z*: [M + Na]<sup>+</sup> Calcd for C<sub>16</sub>H<sub>20</sub>FNNaO<sub>2</sub> 300.1376; Found 300.1378.

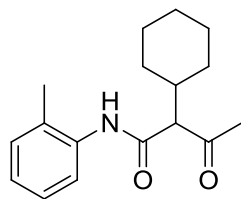

**2-Cyclohexyl-3-oxo-N-(o-tolyl)butanamide (3p)** white solid, purification by flash column chromatography (eluent: Petroleum ether/EtOAc = 15/1), 682 mg (50% yield).  $^1\text{H}$  NMR (600 MHz,  $\text{CDCl}_3$ ):  $\delta$  8.34 (brs, 1H), 7.88 (d,  $J = 7.8$  Hz, 1H), 7.20-7.16 (m, 2H), 7.06-7.03 (m, 2H), 3.43 (d,  $J = 9.6$  Hz, 1H), 2.33 (s, 3H), 2.28 (s, 3H), 2.08-2.01 (m, 1H), 1.83-1.70 (m, 4H), 1.29-1.08 (m, 6H) ppm.  $^{13}\text{C}$  NMR (150 MHz,  $\text{CDCl}_3$ ):  $\delta$  209.9, 165.7, 135.6, 130.5, 128.5, 126.7, 124.9, 122.1, 68.5, 41.9, 32.4, 31.5, 30.6, 26.0, 25.9, 25.8, 17.7 ppm. HRMS (ESI)  $m/z$ :  $[\text{M} + \text{Na}]^+$  Calcd for  $\text{C}_{17}\text{H}_{23}\text{NNaO}_2$  296.1626; Found 296.1625.

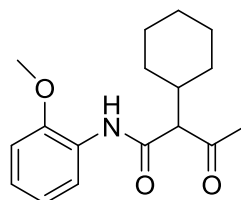

**2-Cyclohexyl-N-(2-methoxyphenyl)-3-oxobutanamide (3q)** white solid, purification by flash column chromatography (eluent: Petroleum ether/EtOAc = 15/1), 665 mg (46% yield).  $^1\text{H}$  NMR (600 MHz,  $\text{CDCl}_3$ ):  $\delta$  8.62 (brs, 1H), 8.33-8.31 (m, 1H), 7.04 (dd,  $J_1 = 7.8$  Hz,  $J_2 = 1.2$  Hz, 1H), 6.95-6.93 (m, 1H), 6.88-6.87 (m, 1H), 3.90 (s, 3H), 3.32 (d,  $J = 9.6$  Hz, 1H), 2.30 (s, 3H), 2.14-2.09 (m, 1H), 1.80-1.65 (m, 4H), 1.32-1.03 (m, 6H) ppm.  $^{13}\text{C}$  NMR (150 MHz,  $\text{CDCl}_3$ ):  $\delta$  208.2, 165.6, 148.2, 127.4, 124.0, 120.9, 119.7, 110.1, 69.8, 55.9, 40.8, 31.3, 31.2, 30.7, 26.0, 25.9, 25.8 ppm. HRMS (ESI)  $m/z$ :  $[\text{M} + \text{Na}]^+$  Calcd for  $\text{C}_{17}\text{H}_{23}\text{NNaO}_3$  312.1576; Found 312.1577.

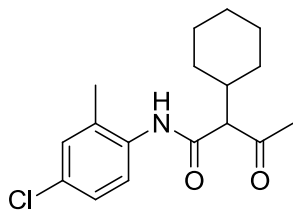

***N*-(4-Chloro-2-methylphenyl)-2-cyclohexyl-3-oxobutanamide (3r)** white solid, purification by flash column chromatography (eluent: Petroleum ether/EtOAc = 15/1), 660 mg (43% yield).  $^1\text{H}$  NMR (600 MHz,  $\text{CDCl}_3$ ):  $\delta$  8.42 (brs, 1H), 7.85-7.84 (m, 1H), 7.15-7.14 (m, 2H), 3.44 (d,  $J = 9.0$  Hz, 1H), 2.33 (s, 3H), 2.25 (s, 3H), 2.05-1.99 (m, 1H), 1.80-1.68 (m, 4H), 1.31-1.10 (m, 6H) ppm.  $^{13}\text{C}$  NMR (150 MHz,  $\text{CDCl}_3$ ):  $\delta$  210.1, 165.8, 134.3, 130.3, 130.2, 130.0, 126.6, 123.2, 68.1, 42.1, 32.6, 31.5, 30.6, 26.0, 25.9, 25.8, 17.6 ppm. HRMS (ESI)  $m/z$ :  $[\text{M} + \text{Na}]^+$  Calcd for  $\text{C}_{17}\text{H}_{22}\text{ClNNaO}_3$  330.1237; Found 330.1238.

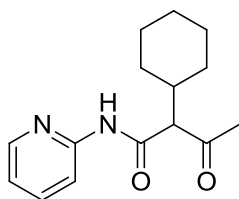

**2-Cyclohexyl-3-oxo-*N*-(pyridin-2-yl)butanamide (3s)** white solid, purification by flash column chromatography (eluent: Petroleum ether/EtOAc = 15/1), 546 mg (42% yield).  $^1\text{H}$  NMR (600 MHz,  $\text{CDCl}_3$ ):  $\delta$  8.67 (brs, 1H), 8.21-8.17 (m, 2H), 7.62-7.59 (m, 1H), 6.92-6.89 (m, 2H), 3.99-3.95 (m, 1H), 2.29 (s, 3H), 1.82-1.80 (m, 2H), 1.68-1.65 (m, 2H), 1.48-1.46 (m, 1H), 1.38-1.23 (m, 2H), 1.22-1.18 (m, 4H) ppm.  $^{13}\text{C}$  NMR (150 MHz,  $\text{CDCl}_3$ ):  $\delta$  170.2, 166.3, 152.7, 147.5, 138.3, 118.8, 114.1, 93.7, 31.1, 25.4, 23.6, 19.6 ppm. HRMS (ESI)  $m/z$ :  $[\text{M} + \text{Na}]^+$  Calcd for  $\text{C}_{15}\text{H}_{20}\text{N}_2\text{NaO}_2$  283.1422; Found 283.1423.

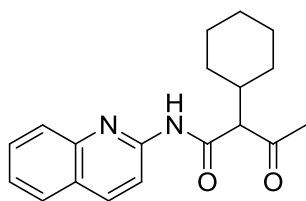

**2-Cyclohexyl-3-oxo-N-(quinolin-2-yl)butanamide (3t)** white solid, purification by flash column chromatography (eluent: Petroleum ether/EtOAc = 15/1), 635 mg (41% yield).  $^1\text{H}$  NMR (600 MHz,  $\text{CDCl}_3$ ):  $\delta$  9.00 (brs, 1H), 8.29 (d,  $J = 9.0$  Hz, 1H), 8.07 (d,  $J = 9.0$  Hz, 1H), 7.77 (d,  $J = 7.2$  Hz, 1H), 7.63 (dd,  $J_1 = 7.8$  Hz,  $J_2 = 1.2$  Hz, 1H), 7.57 (dd,  $J_1 = 7.2$  Hz,  $J_2 = 1.2$  Hz, 1H), 7.37-7.34 (m, 1H), 3.31 (d,  $J = 9.6$  Hz, 1H), 2.24 (s, 3H), 2.17-2.07 (m, 1H), 1.74-1.65 (m, 4H), 1.23-0.95 (m, 6H) ppm.  $^{13}\text{C}$  NMR (150 MHz,  $\text{CDCl}_3$ ):  $\delta$  207.0, 166.9, 150.5, 146.6, 138.6, 130.0, 127.6, 127.5, 126.4, 125.3, 114.1, 69.5, 40.6, 31.4, 31.3, 30.7, 25.9, 25.8, 25.1 ppm. HRMS (ESI)  $m/z$ :  $[\text{M} + \text{Na}]^+$  Calcd for  $\text{C}_{19}\text{H}_{23}\text{N}_2\text{O}_2$  311.1760; Found 311.1761.

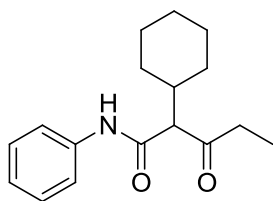

**2-Cyclohexyl-3-oxo-N-phenylpentanamide (3u)** white solid, purification by flash column chromatography (eluent: Petroleum ether/EtOAc = 15/1), 586 mg (43% yield).  $^1\text{H}$  NMR (600 MHz,  $\text{CDCl}_3$ ):  $\delta$  8.41 (brs, 1H), 7.53 (d,  $J = 7.8$  Hz, 2H), 7.31 (t,  $J = 7.8$  Hz, 2H), 7.10 (t,  $J = 7.8$  Hz, 1H), 3.40 (d,  $J = 9.6$  Hz, 1H), 2.70-2.56 (m, 2H), 2.06-2.00 (m, 1H), 1.80-1.62 (m, 4H), 1.28-1.06 (m, 9H) ppm.  $^{13}\text{C}$  NMR (150 MHz,  $\text{CDCl}_3$ ):  $\delta$  212.2, 165.8, 137.6, 129.0, 124.4, 119.8, 68.1, 41.9, 38.8, 31.5, 30.7, 26.0, 25.9, 25.8, 7.2 ppm. HRMS (ESI)  $m/z$ :  $[\text{M} + \text{Na}]^+$  Calcd for  $\text{C}_{17}\text{H}_{23}\text{NNaO}_2$  296.1626; Found 296.1627.

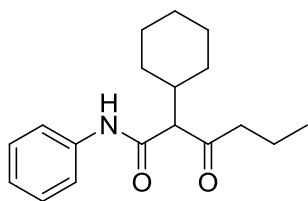

**2-Cyclohexyl-3-oxo-N-phenylhexanamide (3v)** white solid, purification by flash column chromatography (eluent: Petroleum ether/EtOAc = 15/1), 560 mg (39% yield).  $^1\text{H}$  NMR (600 MHz,  $\text{CDCl}_3$ ):  $\delta$  8.31 (brs, 1H), 7.45 (d,  $J = 7.8$  Hz, 2H), 7.24 (t,  $J = 7.8$  Hz, 2H), 7.03 (t,  $J = 7.8$  Hz, 1H), 3.32 (d,  $J = 10.2$  Hz, 1H), 2.60-2.44 (m, 2H), 1.99-1.93 (m, 1H), 1.72-1.53 (m, 7H), 1.20-0.99 (m, 5H), 0.85 (t,  $J = 7.8$  Hz, 3H) ppm.  $^{13}\text{C}$  NMR (150 MHz,  $\text{CDCl}_3$ ):  $\delta$  211.7, 165.8, 137.6, 129.0, 124.4, 120.0, 68.2, 47.3, 41.8, 31.5, 30.6, 26.0, 25.9, 25.8, 16.6, 13.6 ppm. HRMS (ESI)  $m/z$ :  $[\text{M} + \text{Na}]^+$  Calcd for  $\text{C}_{18}\text{H}_{25}\text{NNaO}_2$  310.1783; Found 310.1782.

## 2.2. General procedure for the synthesis of substrates

### 2.2.1 General procedure A (1b as an example):

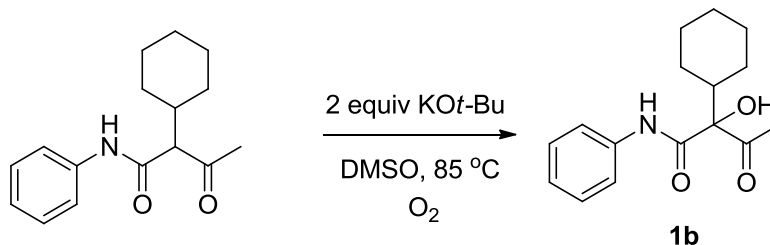

To a solution of 2-cyclohexyl-3-oxo-N-phenylbutanamide (259 mg, 1.0 mmol) in DMSO (10 mL), KO $t$ Bu (224 mg, 2.0 mmol) was added under oxygen atmosphere. The resulting solution was stirred at 85 °C for 30 min. After completion of the reaction, 30 mL water was added and the mixture was cooled gradually to room temperature. And the solution was extracted with dichloromethane. The organic layer was washed with saturated brine, then dried over sodium sulfate. The solvent was removed under reduced pressure. The obtained residue was purified by column chromatography to give the compound as white solid (138 mg, 50%).

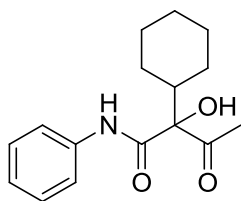

**2-Cyclohexyl-2-hydroxy-3-oxo-N-phenylbutanamide (1b)** white solid, purification by flash column chromatography (eluent: Petroleum ether/EtOAc = 10/1), 138 mg (50% yield).  $^1\text{H}$  NMR (400 MHz,  $\text{CDCl}_3$ ):  $\delta$  8.86 (brs, 1H), 7.54 (d,  $J = 7.6$  Hz, 2H), 7.34 (t,  $J = 7.6$  Hz, 2H), 7.13 (t,  $J = 7.6$  Hz, 1H), 4.84 (brs, 1H), 2.51 (s, 3H), 1.78-1.74 (m, 2H), 1.67-1.65 (m, 2H), 1.33-1.10 (m, 7H) ppm.  $^{13}\text{C}$  NMR (150 MHz,  $\text{CDCl}_3$ ):  $\delta$  208.0, 167.4, 136.9, 129.1, 124.8, 119.7, 88.4, 44.2, 26.4, 26.2, 26.1, 26.0, 25.8, 25.0 ppm. HRMS (EI+)  $m/z$ : Calcd for  $\text{C}_{16}\text{H}_{21}\text{NO}_3$  275.1521; Found 275.1519.

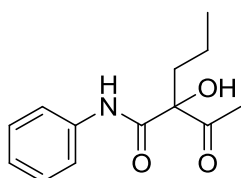

**2-Acetyl-2-hydroxy-N-phenylpentanamide (1a)** white solid, purification by flash column chromatography (eluent: Petroleum ether/EtOAc = 10/1), 141 mg (60% yield).  $^1\text{H}$  NMR (400 MHz,  $\text{CDCl}_3$ ):  $\delta$  8.84 (brs, 1H), 7.54 (d,  $J = 8.0$  Hz, 2H), 7.34 (t,  $J = 8.0$  Hz, 2H), 7.13 (t,  $J = 7.2$  Hz, 1H), 4.94 (brs, 1H), 2.52 (s, 3H), 2.22-2.15 (m, 1H), 1.97-1.89 (m, 1H), 1.46-1.35 (m, 2H), 0.95 (t,  $J = 7.6$  Hz, 3H) ppm.  $^{13}\text{C}$  NMR (150 MHz,  $\text{CDCl}_3$ ):  $\delta$  207.5, 167.5, 136.9, 129.1, 124.8, 119.7, 85.3, 39.6, 24.8, 16.9, 14.0 ppm. HRMS (EI+)  $m/z$ : Calcd for  $\text{C}_{13}\text{H}_{16}\text{NO}_3$  235.1208; Found 235.1191.

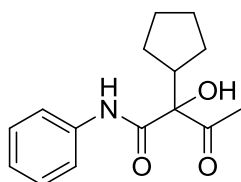

**2-Cyclopentyl-2-hydroxy-3-oxo-N-phenylbutanamide (1c)** white solid, purification by flash column chromatography (eluent: Petroleum ether/EtOAc = 10/1), 120 mg (46% yield).  $^1\text{H}$  NMR (600 MHz,  $\text{CDCl}_3$ ):  $\delta$  8.78 (brs, 1H), 7.46 (d,  $J = 7.8$  Hz, 2H), 7.26 (t,

$J = 7.8$  Hz, 2H), 7.06 (t,  $J = 7.2$  Hz, 1H), 4.82 (brs, 1H), 2.96-2.90 (m, 1H), 2.46 (s, 3H), 1.70-1.64 (m, 1H), 1.58-1.54 (m, 2H), 1.50-1.42 (m, 3H), 1.39-1.34 (m, 1H), 1.13-1.06 (m, 1H) ppm.  $^{13}\text{C}$  NMR (150 MHz,  $\text{CDCl}_3$ ):  $\delta$  207.3, 167.6, 137.0, 129.1, 124.8, 119.8, 86.4, 45.5, 26.8, 25.8, 25.5, 25.4, 24.9 ppm. HRMS (ESI)  $m/z$ :  $[\text{M} + \text{Na}]^+ \text{C}_{15}\text{H}_{19}\text{NO}_3\text{Na}$  284.1263; Found 284.1264.

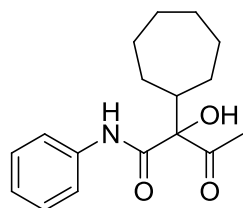

**2-Cycloheptyl-2-hydroxy-3-oxo-N-phenylbutanamide (1d)** white solid, purification by flash column chromatography (eluent: Petroleum ether/EtOAc = 10/1), 118 mg (41% yield).  $^1\text{H}$  NMR (400 MHz,  $\text{CDCl}_3$ ):  $\delta$  8.86 (brs, 1H), 7.54 (d,  $J = 7.6$  Hz, 2H), 7.34 (t,  $J = 7.6$  Hz, 2H), 7.13 (t,  $J = 7.6$  Hz, 1H), 4.88 (brs, 1H), 2.72-2.68 (m, 1H), 2.51 (s, 3H), 1.72-1.70 (m, 2H), 1.59-1.43 (m, 7H), 1.34-1.20 (m, 3H) ppm.  $^{13}\text{C}$  NMR (150 MHz,  $\text{CDCl}_3$ ):  $\delta$  207.9, 167.6, 136.9, 129.1, 124.8, 119.7, 89.7, 45.0, 28.6, 28.2, 28.1, 27.9, 26.9, 26.8, 24.9 ppm. HRMS (ESI)  $m/z$ :  $[\text{M} + \text{H}]^+ \text{C}_{17}\text{H}_{24}\text{NO}_3$  290.1756; Found 290.1752.

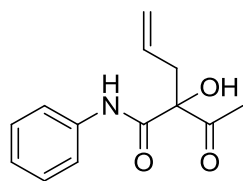

**2-Acetyl-2-hydroxy-N-phenylpent-4-enamide (1e)**, yellow solid, purification by flash column chromatography (eluent: Petroleum ether/EtOAc = 20/1), 142 mg (61% yield).  $^1\text{H}$  NMR (400 MHz,  $\text{CDCl}_3$ ):  $\delta$  8.80 (brs, 1H), 7.53 (d,  $J = 8.0$  Hz, 2H), 7.34 (t,  $J = 8.0$  Hz, 2H), 7.14 (t,  $J = 7.6$  Hz, 1H), 5.76-5.65 (m, 1H), 5.25-5.16 (m, 2H), 4.98 (brs, 1H), 2.94-2.81 (m, 2H), 2.52 (s, 3H) ppm.  $^{13}\text{C}$  NMR (150 MHz,  $\text{CDCl}_3$ ):  $\delta$  206.7, 166.9, 136.8, 130.5, 129.1, 124.9, 120.2, 119.8, 84.8, 41.7, 25.0 ppm. HRMS (ESI)  $m/z$ :

$[M + H]^+$  C<sub>13</sub>H<sub>16</sub>NO<sub>3</sub> 234.1130; Found 234.1120.

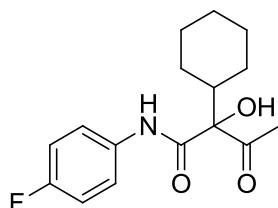

**2-Cyclohexyl-N-(4-fluorophenyl)-2-hydroxy-3-oxobutanamide (1g)** white solid, purification by flash column chromatography (eluent: Petroleum ether/EtOAc = 10/1), 137 mg (46% yield). <sup>1</sup>H NMR (400 MHz, CDCl<sub>3</sub>): δ 8.85 (brs, 1H), 7.52-7.49 (m, 2H), 7.04-7.00 (m, 2H), 4.83 (brs, 1H), 2.51 (s, 3H), 1.78-1.75 (m, 2H), 1.68-1.62 (m, 2H), 1.33-1.12 (m, 7H) ppm. <sup>13</sup>C NMR (150 MHz, CDCl<sub>3</sub>): δ 207.8, 167.4, 160.0 (d, *J*<sub>C-F</sub> = 240.2 Hz), 133.0 (d, *J*<sub>C-F</sub> = 3.2 Hz), 121.5 (d, *J*<sub>C-F</sub> = 7.4 Hz), 115.7 (d, *J*<sub>C-F</sub> = 22.5 Hz), 83.3, 44.1, 26.4, 26.0, 26.0, 25.8, 25.0, 22.7 ppm. HRMS (EI+) *m/z*: Calcd for C<sub>16</sub>H<sub>20</sub>FNO<sub>3</sub> 293.1427; Found 293.1425.

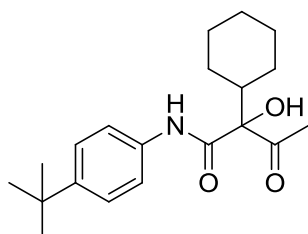

**N-(4-(tert-Butyl)phenyl)-2-cyclohexyl-2-hydroxy-3-oxobutanamide (1i)** white solid, purification by flash column chromatography (eluent: Petroleum ether/EtOAc = 10/1), 175 mg (53% yield). <sup>1</sup>H NMR (400 MHz, CDCl<sub>3</sub>): δ 8.74 (brs, 1H), 7.39 (d, *J* = 8.8 Hz, 2H), 7.27 (d, *J* = 8.8 Hz, 2H), 4.76 (brs, 1H), 2.43 (s, 3H), 1.69-1.67 (m, 2H), 1.60-1.56 (m, 2H), 1.22 (s, 9H), 1.18-1.02 (m, 7H) ppm. <sup>13</sup>C NMR (150 MHz, CDCl<sub>3</sub>): δ 208.2, 167.3, 147.8, 134.3, 125.9, 119.5, 88.3, 44.2, 34.4, 31.3, 26.4, 26.2, 26.1, 26.0, 25.8, 25.1 ppm. HRMS (ESI) *m/z*:  $[M + H]^+$  Calcd for C<sub>20</sub>H<sub>30</sub>NO<sub>3</sub> 332.2226; Found 332.2216.



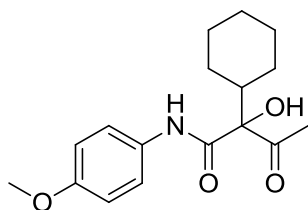

**2-Cyclohexyl-2-hydroxy-N-(4-methoxyphenyl)-3-oxobutanamide (1j)** yellow solid, purification by flash column chromatography (eluent: Petroleum ether/EtOAc = 10/1), 159 mg (52% yield).  $^1\text{H}$  NMR (400 MHz,  $\text{CDCl}_3$ ):  $\delta$  8.68 (brs, 1H), 7.37 (d,  $J$  = 9.2 Hz, 2H), 6.78 (d,  $J$  = 9.2 Hz, 2H), 4.75 (brs, 1H), 3.71 (s, 3H), 2.43 (s, 3H), 1.70-1.67 (m, 2H), 1.58-1.57 (m, 2H), 1.25-1.02 (m, 7H) ppm.  $^{13}\text{C}$  NMR (150 MHz,  $\text{CDCl}_3$ ):  $\delta$  208.2, 167.1, 156.7, 130.1, 121.4, 114.2, 88.3, 55.5, 44.1, 26.4, 26.1, 26.0, 25.8, 25.1 ppm. HRMS (ESI)  $m/z$ :  $[\text{M} + \text{H}]^+$  Calcd for  $\text{C}_{17}\text{H}_{24}\text{NO}_4$  306.1705; Found 306.1709.

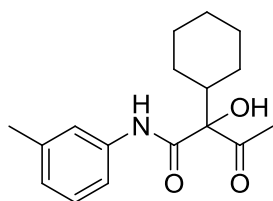

**2-Cyclohexyl-2-hydroxy-3-oxo-N-(m-tolyl)butanamide (1m)** yellow oil, purification by flash column chromatography (eluent: Petroleum ether/EtOAc = 10/1), 159 mg (55% yield).  $^1\text{H}$  NMR (600 MHz,  $\text{CDCl}_3$ ):  $\delta$  8.74 (brs, 1H), 7.35 (s, 1H), 7.22 (d,  $J$  = 7.8 Hz, 1H), 7.14 (t,  $J$  = 7.8 Hz, 1H), 6.87 (d,  $J$  = 7.8 Hz, 1H), 4.76 (brs, 1H), 2.44 (s, 3H), 2.27 (s, 3H), 1.70-1.67 (m, 2H), 1.60-1.57 (m, 2H), 1.27-1.03 (m, 7H) ppm.  $^{13}\text{C}$  NMR (150 MHz,  $\text{CDCl}_3$ ):  $\delta$  208.0, 167.4, 139.1, 136.8, 128.9, 125.6, 120.3, 116.8, 88.3, 44.1, 26.4, 26.1, 25.9, 25.8, 25.0, 21.5 ppm. HRMS (ESI+)  $m/z$ : Calcd for  $\text{C}_{17}\text{H}_{23}\text{NO}_3\text{Na}$  312.1576; Found 312.1579.

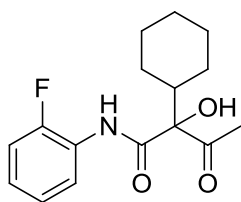

**2-Cyclohexyl-N-(2-fluorophenyl)-2-hydroxy-3-oxobutanamide (1o)** white solid, purification by flash column chromatography (eluent: Petroleum ether/EtOAc =

10/1), 137 mg (46% yield).  $^1\text{H}$  NMR (400 MHz,  $\text{CDCl}_3$ ):  $\delta$  9.16 (brs, 1H), 8.31-8.27 (m, 1H), 7.15-7.06 (m, 3H), 4.85 (brs, 1H), 2.51 (s, 3H), 1.78-1.75 (m, 2H), 1.68-1.64 (m, 2H), 1.36-1.11 (m, 7H) ppm.  $^{13}\text{C}$  NMR (150 MHz,  $\text{CDCl}_3$ ):  $\delta$  207.4, 167.8, 152.7 (d,  $J_{\text{C-F}} = 243.3$  Hz), 125.5 (d,  $J_{\text{C-F}} = 10.4$  Hz), 125.0 (d,  $J_{\text{C-F}} = 7.8$  Hz), 124.5 (d,  $J_{\text{C-F}} = 4.1$  Hz), 121.2, 115.1 (d,  $J_{\text{C-F}} = 19.1$  Hz), 88.6, 44.2, 26.4, 26.1, 26.0, 25.9, 25.8, 24.9 ppm. HRMS (ESI)  $m/z$ :  $[\text{M} + \text{H}]^+$  Calcd for  $\text{C}_{16}\text{H}_{21}\text{FNO}_3$  294.1515; Found 294.1513.

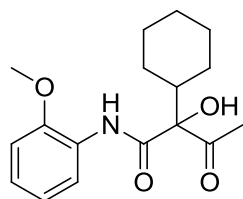

**2-Cyclohexyl-2-hydroxy-N-(2-methoxyphenyl)-3-oxobutanamide (1q)** white solid, purification by flash column chromatography (eluent: Petroleum ether/EtOAc = 10/1), 159 mg (52% yield).  $^1\text{H}$  NMR (400 MHz,  $\text{CDCl}_3$ ):  $\delta$  9.39 (brs, 1H), 8.28 (d,  $J = 8.0$  Hz, 1H), 7.02-6.98 (m, 1H), 6.88 (t,  $J = 8.0$  Hz, 1H), 6.81 (d,  $J = 8.0$  Hz, 1H), 4.76 (brs, 1H), 3.81 (s, 1H), 2.44 (s, 3H), 1.70-1.67 (m, 2H), 1.60-1.57 (m, 2H), 1.25-1.08 (m, 7H) ppm.  $^{13}\text{C}$  NMR (150 MHz,  $\text{CDCl}_3$ ):  $\delta$  208.1, 167.3, 148.5, 126.8, 124.4, 120.9, 119.3, 110.1, 88.6, 55.7, 44.2, 26.4, 26.2, 26.1, 26.0, 25.9, 25.0 ppm. HRMS (ESI)  $m/z$ :  $[\text{M} + \text{H}]^+$  Calcd for  $\text{C}_{17}\text{H}_{24}\text{NO}_4$  306.1705; Found 306.1701.

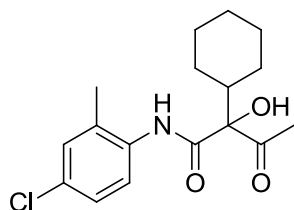

**N-(4-Chloro-2-methylphenyl)-2-cyclohexyl-2-hydroxy-3-oxobutanamide (1r)** white solid, purification by flash column chromatography (eluent: Petroleum ether/EtOAc = 10/1), 164 mg (50% yield).  $^1\text{H}$  NMR (400 MHz,  $\text{CDCl}_3$ ):  $\delta$  8.83 (brs, 1H), 7.92 (d,  $J = 8.8$  Hz, 1H), 7.19-7.17 (m, 2H), 4.86 (brs, 1H), 2.51 (s, 3H), 2.22 (s, 3H), 1.77-1.75 (m, 2H), 1.64-1.63 (m, 2H), 1.32-1.13 (m, 7H) ppm.  $^{13}\text{C}$  NMR (150 MHz,  $\text{CDCl}_3$ ):  $\delta$  208.0, 167.4, 133.6, 130.3, 130.1, 130.0, 126.8, 122.6, 88.6, 44.2, 26.4,

26.0, 25.9, 25.8, 17.4 ppm. HRMS (ESI)  $m/z$ :  $[M + H]^+$   $C_{17}H_{23}NO_3Cl$  324.1366; Found 324.1357.

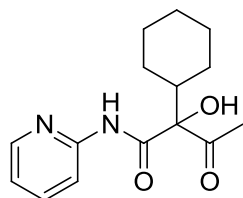

**2-Cyclohexyl-2-hydroxy-3-oxo-N-(pyridin-3-yl)butanamide (1s)** yellow solid, purification by flash column chromatography (eluent: Petroleum ether/EtOAc = 10/1), 132 mg (48% yield).  $^1H$  NMR (400 MHz,  $CDCl_3$ ):  $\delta$  9.44 (brs, 1H), 8.31 (d,  $J$  = 4.0 Hz, 1H), 8.20 (d,  $J$  = 8.4 Hz, 1H), 7.73-7.69 (m, 1H), 7.08-7.05 (m, 1H), 4.93 (brs, 1H), 2.50 (s, 3H), 1.75-1.63 (m, 4H), 1.37-1.13 (m, 7H) ppm.  $^{13}C$  NMR (150 MHz,  $CDCl_3$ ):  $\delta$  207.1, 168.4, 150.4, 148.2, 138.3, 120.3, 113.7, 88.4, 44.2, 26.4, 26.1, 26.0, 25.9, 25.8, 24.9 ppm. HRMS (ESI)  $m/z$ :  $[M + H]^+$   $C_{15}H_{21}N_2O_3$  277.1552; Found 277.1556.

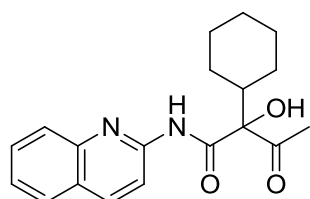

**2-Cyclohexyl-2-hydroxy-3-oxo-N-(quinolin-2-yl)butanamide (1t)** yellow solid, purification by flash column chromatography (eluent: Petroleum ether/EtOAc = 5/1), 146 mg (45% yield).  $^1H$  NMR (400 MHz,  $CDCl_3$ ):  $\delta$  9.65 (brs, 1H), 8.40 (d,  $J$  = 8.8 Hz, 1H), 8.18 (d,  $J$  = 8.8 Hz, 1H), 7.86 (d,  $J$  = 8.4 Hz, 1H), 7.78 (d,  $J$  = 8.4 Hz, 1H), 7.63 (t,  $J$  = 8.0 Hz, 1H), 7.46 (t,  $J$  = 8.0 Hz, 1H), 4.92 (brs, 1H), 2.53 (s, 3H), 1.76-1.65 (m, 4H), 1.38-1.11 (m, 7H) ppm.  $^{13}C$  NMR (150 MHz,  $CDCl_3$ ):  $\delta$  207.0, 168.8, 149.8, 146.7, 138.6, 130.1, 127.7, 127.5, 126.5, 125.5, 113.7, 88.5, 44.3, 26.5, 26.1, 26.0, 25.9, 25.8, 24.9 ppm. HRMS (ESI)  $m/z$ :  $[M + H]^+$   $C_{19}H_{23}N_2O_3$  327.1709; Found 327.1693.

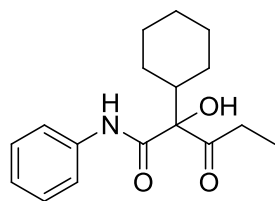

**2-Cyclohexyl-2-hydroxy-3-oxo-N-phenylpentanamide (1u)** white solid, purification by flash column chromatography (eluent: Petroleum ether/EtOAc = 10/1), 124 mg (43% yield). <sup>1</sup>H NMR (400 MHz, CDCl<sub>3</sub>): δ 8.87 (brs, 1H), 7.54 (d, *J* = 8.0 Hz, 2H), 7.33 (t, *J* = 8.0 Hz, 2H), 7.13 (t, *J* = 7.6 Hz, 1H), 4.90 (brs, 1H), 3.18-3.08 (m, 1H), 2.79-2.68 (m, 1H), 2.51-2.44 (m, 1H), 1.32-1.26 (m, 6H), 1.21-1.07 (m, 7H) ppm. <sup>13</sup>C NMR (150 MHz, CDCl<sub>3</sub>): δ 210.9, 167.7, 137.0, 129.1, 124.8, 119.7, 88.0, 26.5, 26.1, 26.0, 25.9, 25.8, 7.6 ppm. HRMS (ESI) *m/z*: [M + Na]<sup>+</sup> C<sub>17</sub>H<sub>23</sub>NO<sub>3</sub>Na 312.1576; Found 312.1566.

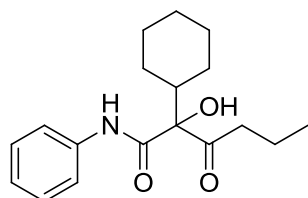

**2-Cyclohexyl-2-hydroxy-3-oxo-N-phenylhexanamide (1v)** white solid, purification by flash column chromatography (eluent: Petroleum ether/EtOAc = 10/1), 121 mg (40% yield). <sup>1</sup>H NMR (400 MHz, CDCl<sub>3</sub>): δ 8.86 (brs, 1H), 7.54 (d, *J* = 7.6 Hz, 2H), 7.33 (t, *J* = 8.0 Hz, 2H), 7.13 (t, *J* = 7.6 Hz, 1H), 4.90 (brs, 1H), 3.15-3.07 (m, 1H), 2.71-2.62 (m, 1H), 2.51-2.49 (m, 1H), 1.67-1.61 (m, 5H), 1.37-1.21 (m, 6H), 0.94 (t, *J* = 7.2 Hz, 3H) ppm. <sup>13</sup>C NMR (150 MHz, CDCl<sub>3</sub>): δ 210.2, 167.6, 137.0, 129.1, 124.7, 119.7, 88.1, 44.5, 38.9, 26.5, 26.2, 26.1, 26.0, 25.8, 16.8, 13.6 ppm. HRMS (ESI) *m/z*: [M + Na]<sup>+</sup> C<sub>18</sub>H<sub>25</sub>NO<sub>3</sub>Na 326.1732; Found 326.1732.

### 2.2.2 General procedure B (1n as an example)<sup>[1]</sup>:

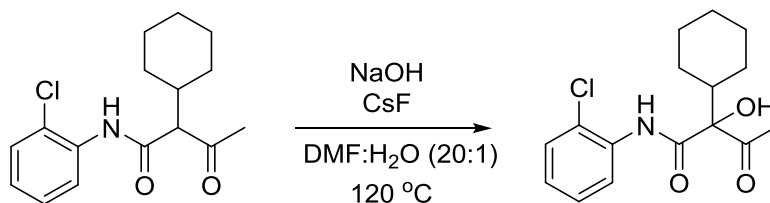

To a solution of *N*-(2-chlorophenyl)-2-cyclohexyl-3-oxobutanamide (293 mg, 1.0 mmol) in 10 mL of DMF and 0.5 mL of water, sodium hydroxide (8 mg, 0.2 mmol) and cesium fluoride (15.2 mg, 0.1 mmol) was added slowly. After the completion of the reaction monitored by TLC. 30 mL CH<sub>2</sub>Cl<sub>2</sub> was added and the solution was extracted with water (30 mL×3). The organic layer was washed with saturated brine, then dried over sodium sulfate. The solvent was removed under reduced pressure. The obtained residue was purified by column chromatography to give the compound as white soild (170 mg, 53%).

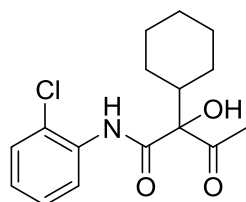

***N*-(2-Chlorophenyl)-2-cyclohexyl-2-hydroxy-3-oxobutanamide (1n)** yellow soild, purification by flash column chromatography (eluent: Petroleum ether/EtOAc = 10/1), 158 mg (51% yield). <sup>1</sup>H NMR (400 MHz, CDCl<sub>3</sub>): δ 9.52 (brs, 1H), 8.37 (dd, *J*<sub>1</sub> = 8.4 Hz, *J*<sub>2</sub> = 1.6 Hz, 1H), 7.38 (dd, *J*<sub>1</sub> = 8.0 Hz, *J*<sub>2</sub> = 1.2 Hz, 1H), 7.27 (m, 1H), 7.06 (m, 1H), 4.89 (brs, 3H), 2.52 (s, 3H), 1.77-1.75 (m, 2H), 1.68-1.63 (m, 2H), 1.36-1.14 (m, 7H) ppm. <sup>13</sup>C NMR (150 MHz, CDCl<sub>3</sub>): δ 207.4, 167.8, 133.9, 129.2, 127.6, 125.1, 123.6, 121.0, 88.7, 44.2, 26.4, 26.1, 26.0, 25.9, 25.8, 24.9 ppm. HRMS (ESI) *m/z*: [M + H]<sup>+</sup> Calcd for C<sub>16</sub>H<sub>21</sub>NO<sub>3</sub>Cl 310.1210; Found 310.1200.

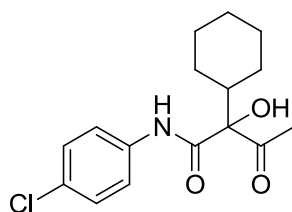

***N*-(4-Chlorophenyl)-2-cyclohexyl-2-hydroxy-3-oxobutanamide (1f)** white soild, purification by flash column chromatography (eluent: Petroleum ether/EtOAc = 10/1), 151 mg (49% yield). <sup>1</sup>H NMR (400 MHz, CDCl<sub>3</sub>): δ 8.89 (brs, 1H), 7.50 (d, *J* =

8.8 Hz, 2H), 7.29 (d,  $J = 8.8$  Hz, 2H), 4.84 (brs, 1H), 2.50 (s, 3H), 1.78-1.74 (m, 2H), 1.64-1.60 (m, 2H), 1.31-1.10 (m, 7H) ppm.  $^{13}\text{C}$  NMR (150 MHz,  $\text{CDCl}_3$ ):  $\delta$  207.6, 167.5, 135.5, 129.8, 129.1, 120.9, 88.4, 44.1, 26.4, 26.1, 26.0, 25.8, 24.9 ppm. HRMS (EI+)  $m/z$ : Calcd for  $\text{C}_{16}\text{H}_{20}\text{ClNO}_3$  309.1132; Found 309.1131.

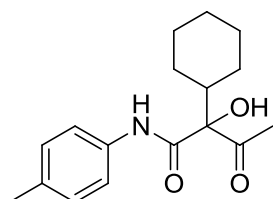

**2-Cyclohexyl-2-hydroxy-3-oxo-N-(p-tolyl)butanamide (1h)** yellow solid, purification by flash column chromatography (eluent: Petroleum ether/EtOAc = 10/1), 141 mg (49% yield).  $^1\text{H}$  NMR (400 MHz,  $\text{CDCl}_3$ ):  $\delta$  8.80 (brs, 1H), 7.42 (d,  $J = 8.4$  Hz, 2H), 7.13 (t,  $J = 8.4$  Hz, 2H), 4.83 (brs, 1H), 2.50 (s, 3H), 2.31 (s, 3H), 1.77-1.73 (m, 2H), 1.67-1.64 (m, 2H), 1.32-1.09 (m, 7H) ppm.  $^{13}\text{C}$  NMR (100 MHz,  $\text{CDCl}_3$ ):  $\delta$  208.1, 167.2, 134.5, 134.4, 129.6, 119.7, 88.3, 44.2, 26.4, 24.0, 26.0, 26.0, 25.8, 25.1, 20.9 ppm. HRMS (EI+)  $m/z$ : Calcd for  $\text{C}_{17}\text{H}_{23}\text{NO}_3$  289.1678; Found 289.1676.

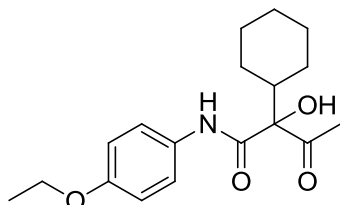

**2-Cyclohexyl-N-(4-ethoxyphenyl)-2-hydroxy-3-oxobutanamide (1k)** white solid, purification by flash column chromatography (eluent: Petroleum ether/EtOAc = 5/1), 147 mg (46% yield).  $^1\text{H}$  NMR (400 MHz,  $\text{CDCl}_3$ ):  $\delta$  8.67 (brs, 1H), 7.36 (d,  $J = 8.8$  Hz, 2H), 6.78 (d,  $J = 8.8$  Hz, 2H), 4.74 (brs, 1H), 3.93 (q,  $J = 6.8$  Hz, 2H), 2.43 (s, 3H), 1.70-1.68 (m, 2H), 1.59-1.57 (m, 2H), 1.32 (t,  $J = 6.8$  Hz, 3H), 1.25-1.03 (m, 7H) ppm.  $^{13}\text{C}$  NMR (150 MHz,  $\text{CDCl}_3$ ):  $\delta$  208.2, 167.1, 156.0, 130.0, 121.4, 114.8, 88.3, 63.7, 44.1, 26.4, 26.1, 26.0, 25.9, 25.8, 25.1, 14.8 ppm. HRMS (ESI)  $m/z$ :  $[\text{M} + \text{H}]^+$  Calcd for  $\text{C}_{18}\text{H}_{26}\text{NO}_4$  320.1862; Found 320.1857.

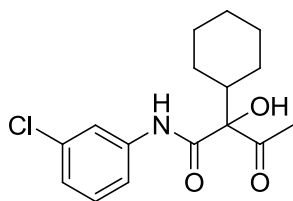

***N*-(3-Chlorophenyl)-2-cyclohexyl-2-hydroxy-3-oxobutanamide (1l)** colorless oil, purification by flash column chromatography (eluent: Petroleum ether/EtOAc = 10/1), 169 mg (55% yield).  $^1\text{H}$  NMR (400 MHz,  $\text{CDCl}_3$ ):  $\delta$  8.88 (brs, 1H), 7.73 (d,  $J$  = 2.0 Hz, 1H), 7.36-7.33 (m, 1H), 7.26-7.23 (m, 1H), 7.12-7.10 (m, 1H), 4.84 (brs, 1H), 2.50 (s, 3H), 1.78-1.75 (m, 2H), 1.68-1.60 (m, 2H), 1.35-1.09 (m, 7H) ppm.  $^{13}\text{C}$  NMR (150 MHz,  $\text{CDCl}_3$ ):  $\delta$  207.5, 167.7, 138.0, 134.8, 130.0, 124.8, 119.8, 117.7, 88.4, 44.2, 26.4, 26.1, 26.0, 25.9, 25.8, 24.9 ppm. HRMS (ESI)  $m/z$ :  $[\text{M} + \text{H}]^+$  Calcd for  $\text{C}_{16}\text{H}_{21}\text{NO}_3\text{Cl}$  310.1210; Found 310.1201.

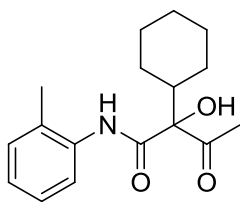

**2-Cyclohexyl-2-hydroxy-3-oxo-*N*-(*o*-tolyl)butanamide (1p)** white solid, purification by flash column chromatography (eluent: Petroleum ether/EtOAc = 10/1), 168 mg (58% yield).  $^1\text{H}$  NMR (400 MHz,  $\text{CDCl}_3$ ):  $\delta$  8.85 (brs, 1H), 7.95 (d,  $J$  = 8.0 Hz, 1H), 7.20 (m, 2H), 7.07 (t,  $J$  = 7.6 Hz, 1H), 4.87 (brs, 1H), 2.51 (s, 3H), 2.25 (s, 3H), 1.77-1.75 (m, 2H), 1.68-1.66 (m, 2H), 1.32-1.11 (m, 7H) ppm.  $^{13}\text{C}$  NMR (150 MHz,  $\text{CDCl}_3$ ):  $\delta$  208.4, 167.3, 135.0, 130.5, 128.3, 126.8, 125.1, 121.5, 88.6, 44.3, 26.4, 26.1, 26.0, 25.9, 25.8, 25.2, 17.6 ppm. HRMS (EI+)  $m/z$ : Calcd for  $\text{C}_{17}\text{H}_{23}\text{NO}_3$  289.1678; Found 289.1676.

### 3. Optimization of multiple C-C bond cleavage conditions by employing **1a** or **1b** as substrates

Table S1. Optimization of multiple C-C bond cleavage conditions by employing **1a** as substrate<sup>a</sup>

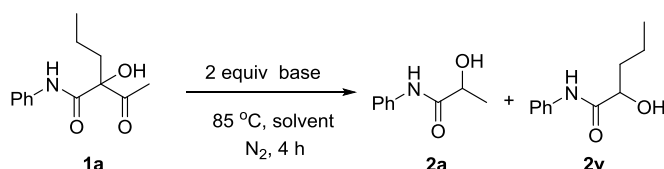

| entry           | base   | time (h) | solvent                              | <b>2a</b><br>yield<br>(%) <sup>b</sup> | <b>2v</b> yield<br>(%) <sup>b</sup> |
|-----------------|--------|----------|--------------------------------------|----------------------------------------|-------------------------------------|
| 1               | KOtBu  | 4        | DMSO                                 | 29                                     | 35                                  |
| 2 <sup>c</sup>  | KOtBu  | 4        | DMSO                                 | 26                                     | 40                                  |
| 3 <sup>d</sup>  | KOtBu  | 4        | DMSO                                 | 18                                     | 33                                  |
| 4 <sup>e</sup>  | KOtBu  | 4        | DMSO                                 | 20                                     | 37                                  |
| 5               | KOtBu  | 2        | DMSO                                 | 16                                     | 30                                  |
| 6               | KOtBu  | 6        | DMSO                                 | 27                                     | 45                                  |
| 7               | KOtBu  | 4        | DMF                                  | N.R.                                   | N.R.                                |
| 8               | KOtBu  | 4        | toluene                              | N.R.                                   | N.R.                                |
| 9               | KOtBu  | 4        | ClCH <sub>2</sub> CH <sub>2</sub> Cl | N.R.                                   | N.R.                                |
| 10              | LiOtBu | 4        | <i>t</i> BuOH                        | N.R.                                   | N.R.                                |
| 11 <sup>f</sup> | KOtBu  | 4        | DMSO                                 | 11                                     | 36                                  |
| 12              | TBD    | 4        | DMSO                                 | N.R.                                   | N.R.                                |
| 13              | DABCO  | 4        | DMSO                                 | N.R.                                   | N.R.                                |
| 14              | None   | 4        | DMSO                                 | N.R.                                   | N.R.                                |

<sup>a</sup> Reaction Conditions: **1a** (0.2 mmol) and base (0.4 mmol) in solvent (2 mL) was stirred at 85 °C under N<sub>2</sub> atmosphere. <sup>b</sup> Isolated yield. <sup>c</sup> 3 equiv of KOtBu was used. <sup>d</sup> The reaction was carried out at 100 °C with 1 equiv KOtBu. <sup>e</sup> The reaction was carried out at 70 °C. <sup>f</sup> 2 equiv 1,10-phenanthroline as the additive.



Table S2. Optimization of multiple C-C bond cleavage conditions by employing **1b** as substrate<sup>a</sup>

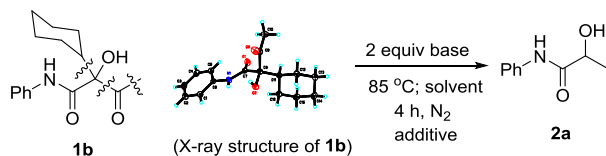

| entry           | base                | solvent                     | yield (%) <sup>b</sup> |
|-----------------|---------------------|-----------------------------|------------------------|
| 1 <sup>c</sup>  | KO <i>t</i> Bu      | DMSO                        | 65                     |
| <b>2</b>        | <b>KO<i>t</i>Bu</b> | <b>DMSO</b>                 | <b>71</b>              |
| 3 <sup>d</sup>  | KO <i>t</i> Bu      | DMSO                        | 33                     |
| 4 <sup>e</sup>  | KO <i>t</i> Bu      | DMSO                        | 43                     |
| 5 <sup>f</sup>  | KO <i>t</i> Bu      | DMSO                        | 66                     |
| 6 <sup>g</sup>  | KO <i>t</i> Bu      | DMSO                        | 45                     |
| 7 <sup>h</sup>  | KO <i>t</i> Bu      | DMSO                        | 61                     |
| 8               | KO <i>t</i> Bu      | toluene                     | <10                    |
| 9               | KO <i>t</i> Bu      | DCE                         | trace                  |
| 10              | KO <i>t</i> Bu      | <i>t</i> -BuOH              | trace                  |
| 11              | KO <i>t</i> Bu      | DMSO: <i>t</i> -BuOH= 5:1   | 14                     |
| 12              | KO <i>t</i> Bu      | tetrahydrothiophene 1-oxide | 42                     |
| 13              | TBD                 | DMSO                        | trace                  |
| 14              | DABCO               | DMSO                        | trace                  |
| 15              | DBU                 | DMSO                        | trace                  |
| 16              | NaO <i>t</i> Bu     | DMSO                        | 40                     |
| 17              | LiO <i>t</i> Bu     | DMSO                        | 55                     |
| 18 <sup>i</sup> | KO <i>t</i> Bu      | DMSO                        | 29                     |
| 19 <sup>j</sup> | KO <i>t</i> Bu      | DMSO                        | 61                     |

<sup>a</sup>reaction Conditions: **1b** (0.2 mmol) and base (0.4 mmol) in solvent (2 mL) was stirred at 85 °C under N<sub>2</sub> atmosphere for 4 h. <sup>b</sup> Isolated yield. <sup>c</sup> 3 equiv of KO*t*Bu was used. <sup>d</sup> 1 equiv of KO*t*Bu was used. <sup>e</sup>The reaction was carried out for 2 h. <sup>f</sup>The reaction was carried out for 6 h. <sup>g</sup> The reaction was carried out at 70 °C. <sup>h</sup>The reaction was carried out at 100 °C. <sup>i</sup>1,10-phenanthroline as the additive. <sup>j</sup> The reaction was carried out under air atmosphere.

## 4. Synthesis of $\alpha$ -hydroxy acylamide via C-C bond cleavages

### 4.1 Typical procedure for preparing products (2a as example):

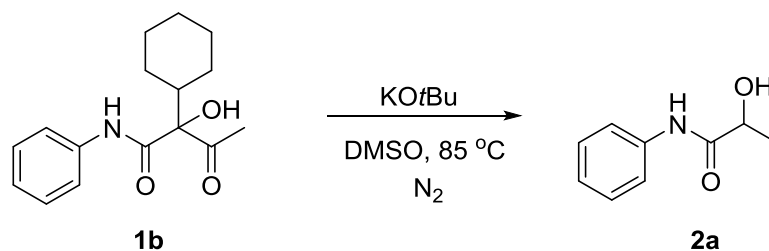

Under N<sub>2</sub> atmosphere, KO<sup>t</sup>Bu (44.8 mg, 0.4 mmol) was dissolved in 2 mL DMSO. Substrate **1b** (55 mg, 0.2 mmol) was added into the solution. When the reaction finished in 4 h monitored by TLC, the reaction was quenched with 10 mL H<sub>2</sub>O. Then the mixture was extracted with CH<sub>2</sub>Cl<sub>2</sub> (25 mL × 3), washed sequentially with saturated sodium chloride solution (50 mL). The combined organic phase was dried over MgSO<sub>4</sub>, filtered and evaporated under reduced pressure. The resulting residue was purified by flash chromatography over silica gel (Petroleum ether/ EtOAc = 2:1) to give **2a** as a white solid (23 mg, 71% yield).

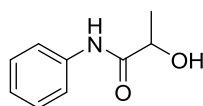

**2-Hydroxy-N-phenylpropanamide (2a)**,<sup>[2]</sup> white solid, purification by flash column chromatography (eluent: Petroleum ether/EtOAc = 2/1), 23 mg (70% yield). <sup>1</sup>H NMR (400 MHz, CDCl<sub>3</sub>):  $\delta$  8.66 (brs, 1H), 7.51 (d,  $J$  = 7.6 Hz, 2H), 7.30 (m, 2H), 7.11 (t,  $J$  = 7.6 Hz, 1H), 4.29 (d,  $J$  = 5.2 Hz, 1H), 4.09 (brs, 1H), 1.47 (d,  $J$  = 6.8 Hz, 3H) ppm. <sup>13</sup>C NMR (100 MHz, CDCl<sub>3</sub>):  $\delta$  173.3, 137.0, 129.1, 124.7, 120.0, 68.7, 21.1 ppm.

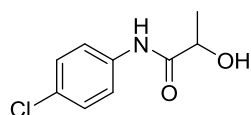

**N-(4-Chlorophenyl)-2-hydroxypropanamide (2f)**,<sup>[3]</sup> yellow solid, purification by flash column chromatography (eluent: Petroleum ether/EtOAc = 2/1), 25 mg (62% yield). <sup>1</sup>H NMR (400 MHz, CDCl<sub>3</sub>):  $\delta$  8.51 (brs, 1H), 7.42 (d,  $J$  = 8.8 Hz, 2H), 7.20 (d,

$J = 8.8$  Hz, 2H), 4.27 (q,  $J = 6.8$  Hz, 1H), 3.33 (brs, 1H), 1.43 (d,  $J = 6.8$  Hz, 3H) ppm.  
 $^{13}\text{C}$  NMR (100 MHz,  $\text{CDCl}_3$ ):  $\delta$  172.9, 135.7, 129.7, 129.1, 121.1, 68.8, 21.1 ppm.

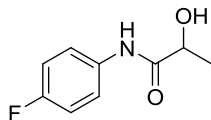

***N*-(4-Fluorophenyl)-2-hydroxypropanamide (2g)**,<sup>[2]</sup> white solid, purification by flash column chromatography (eluent: Petroleum ether/EtOAc = 2/1), 23 mg (61% yield).  $^1\text{H}$  NMR (400 MHz,  $\text{CDCl}_3$ ):  $\delta$  8.56 (brs, 1H), 7.52-7.48 (m, 2H), 7.03-6.99 (m, 2H), 4.37-4.31 (m, 1H), 3.42 (brs, 1H), 1.50 (d,  $J = 6.8$  Hz, 3H) ppm.  $^{13}\text{C}$  NMR (150 MHz,  $\text{CDCl}_3$ ):  $\delta$  172.7, 159.5 (d,  $J_{\text{C-F}} = 242.4$  Hz), 133.2 (d,  $J_{\text{C-F}} = 3.3$  Hz), 121.6 (d,  $J_{\text{C-F}} = 8.1$  Hz), 115.8 (d,  $J_{\text{C-F}} = 22.5$  Hz), 68.8, 21.1 ppm.

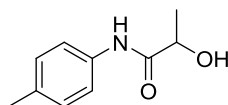

**2-Hydroxy-*N*-(p-tolyl)propanamide (2h)**,<sup>[2]</sup> yellow solid, purification by flash column chromatography (eluent: Petroleum ether/EtOAc = 2/1), 26 mg (72% yield).  $^1\text{H}$  NMR (400 MHz,  $\text{CDCl}_3$ ):  $\delta$  8.54 (brs, 1H), 7.40 (d,  $J = 8.4$  Hz, 2H), 7.10 (d,  $J = 8.4$  Hz, 2H), 4.30 (q,  $J = 6.8$  Hz, 1H), 3.81 (brs, 1H), 2.30 (s, 3H), 1.47 (d,  $J = 6.8$  Hz, 3H) ppm.  $^{13}\text{C}$  NMR (100 MHz,  $\text{CDCl}_3$ ):  $\delta$  173.1, 134.5, 134.3, 129.5, 120.0, 68.8, 21.1, 20.9 ppm.

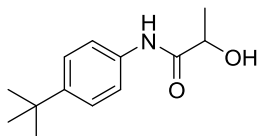

***N*-(4-(tert-Butyl)phenyl)-2-hydroxypropanamide (2i)**, white solid, purification by flash column chromatography (eluent: Petroleum ether/EtOAc = 2/1), 31 mg (69% yield).  $^1\text{H}$  NMR (400 MHz,  $\text{CDCl}_3$ ):  $\delta$  8.61 (brs, 1H), 7.44 (d,  $J = 8.8$  Hz, 2H), 4.30 (q,  $J = 6.8$  Hz, 1H), 4.07 (brs, 1H), 1.47 (d,  $J = 6.8$  Hz, 3H), 1.29 (s, 9H) ppm.  $^{13}\text{C}$  NMR (150 MHz,  $\text{CDCl}_3$ ):  $\delta$  173.2, 147.7, 134.5, 125.9, 119.8, 68.7, 34.4, 31.4, 21.1 ppm.

HRMS (ESI)  $m/z$ :  $[M + H]^+$   $C_{13}H_{20}NO_2$  222.1494; Found 222.1489.

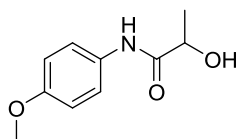

**2-Hydroxy-N-(4-methoxyphenyl)propanamide (2j)**,<sup>[3]</sup> yellow solid, purification by flash column chromatography (eluent: Petroleum ether/EtOAc = 2/1), 25 mg (63% yield).  $^1H$  NMR (400 MHz,  $CDCl_3$ ):  $\delta$  8.50 (brs, 1H), 7.42 (d,  $J = 8.8$  Hz, 2H), 6.84 (d,  $J = 8.8$  Hz, 2H), 4.33-4.27 (m, 1H), 3.77-3.75 (m, 4H), 1.48 (d,  $J = 6.8$  Hz, 3H) ppm.  $^{13}C$  NMR (100 MHz,  $CDCl_3$ ):  $\delta$  172.8, 156.6, 130.2, 121.7, 114.2, 68.7, 55.5, 21.1 ppm.

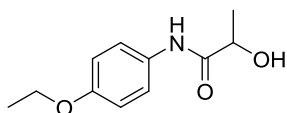

**N-(4-Ethoxyphenyl)-2-hydroxypropanamide (2k)**,<sup>[4]</sup> white solid, purification by flash column chromatography (eluent: Petroleum ether/EtOAc = 2/1), 27 mg (65% yield).  $^1H$  NMR (400 MHz,  $CDCl_3$ ):  $\delta$  8.53 (brs, 1H), 7.40 (d,  $J = 8.8$  Hz, 2H), 6.82 (d,  $J = 9.2$  Hz, 2H), 4.28 (q,  $J = 6.8$  Hz, 1H), 3.98 (q,  $J = 7.2$  Hz, 2H), 1.46 (d,  $J = 6.8$  Hz, 3H), 1.39 (d,  $J = 6.8$  Hz, 3H) ppm.  $^{13}C$  NMR (150 MHz,  $CDCl_3$ ):  $\delta$  173.0, 156.0, 130.1, 121.7, 114.8, 68.7, 63.7, 21.1, 14.8 ppm.

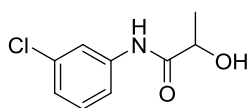

**N-(3-Chlorophenyl)-2-hydroxypropanamide (2l)**,<sup>[3]</sup> white oil, purification by flash column chromatography (eluent: Petroleum ether/EtOAc = 2/1), 23 mg (58% yield).  $^1H$  NMR (400 MHz,  $CDCl_3$ ):  $\delta$  8.63 (brs, 1H), 7.67 (s, 1H), 7.38 (d,  $J = 8.0$  Hz, 1H), 7.23 (t,  $J = 8.0$  Hz, 1H), 7.09 (d,  $J = 8.0$  Hz, 1H), 4.35 (q,  $J = 6.8$  Hz, 1H), 3.45 (brs, 1H), 1.51 (d,  $J = 6.8$  Hz, 3H) ppm.  $^{13}C$  NMR (150 MHz,  $CDCl_3$ ):  $\delta$  173.0, 138.3, 134.7, 130.1, 124.7, 120.0, 117.9, 68.8, 21.1 ppm.

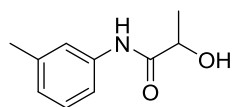

**2-Hydroxy-N-(m-tolyl)propanamide (2m)**, white solid, purification by flash column chromatography (eluent: Petroleum ether/EtOAc = 2/1), 22 mg (62% yield).  $^1\text{H}$  NMR (600 MHz,  $\text{CDCl}_3$ ):  $\delta$  8.43 (brs, 1H), 7.30 (s, 1H), 7.24 (d,  $J = 7.8$  Hz, 1H), 7.12 (t,  $J = 7.8$  Hz, 1H), 6.86 (d,  $J = 7.8$  Hz, 1H), 4.24 (q,  $J = 7.2$  Hz, 1H), 3.39 (brs, 1H), 2.25 (s, 3H), 1.42 (d,  $J = 7.2$  Hz, 3H) ppm.  $^{13}\text{C}$  NMR (150 MHz,  $\text{CDCl}_3$ ):  $\delta$  172.7, 139.0, 137.1, 128.9, 125.4, 120.5, 117.0, 68.8, 21.5, 21.2 ppm. HRMS (EI+)  $m/z$ : Calcd for  $\text{C}_{10}\text{H}_{13}\text{NO}_2$  179.0946; Found 179.0945.

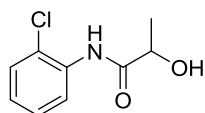

**N-(2-Chlorophenyl)-2-hydroxypropanamide (2n)**,<sup>[3]</sup> yellow solid, purification by flash column chromatography (eluent: Petroleum ether/EtOAc = 2/1), 27 mg (68% yield).  $^1\text{H}$  NMR (400 MHz,  $\text{CDCl}_3$ ):  $\delta$  9.14 (brs, 1H), 8.39 (dd,  $J_1 = 8.4$  Hz,  $J_2 = 1.2$  Hz, 1H), 7.37 (dd,  $J_1 = 8.0$  Hz,  $J_2 = 1.6$  Hz, 1H), 7.29-7.25 (m, 1H), 7.07-7.03 (m, 1H), 4.42 (q,  $J = 2.8$  Hz, 1H), 3.28 (brs, 1H), 1.55 (d,  $J = 6.8$  Hz, 3H) ppm.  $^{13}\text{C}$  NMR (100 MHz,  $\text{CDCl}_3$ ):  $\delta$  172.8, 134.1, 129.1, 127.7, 124.9, 123.3, 121.3, 69.2, 21.1 ppm.

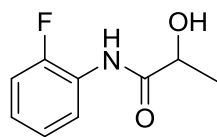

**N-(2-Fluorophenyl)-2-hydroxypropanamide (2o)**, white solid, purification by flash column chromatography (eluent: Petroleum ether/EtOAc = 2/1), 21 mg (58% yield).  $^1\text{H}$  NMR (400 MHz,  $\text{CDCl}_3$ ):  $\delta$  8.77 (brs, 1H), 8.32 (t,  $J = 8.0$  Hz, 1H), 7.15-7.05 (m, 3H), 4.40 (q,  $J = 6.8$  Hz, 1H), 3.07 (brs, 1H), 1.55 (d,  $J = 6.8$  Hz, 3H) ppm.  $^{13}\text{C}$  NMR (150 MHz,  $\text{CDCl}_3$ ):  $\delta$  172.7, 152.7 (d,  $J_{\text{C-F}} = 242.4$  Hz), 125.7 (d,  $J_{\text{C-F}} = 10.4$  Hz), 124.7 (d,  $J_{\text{C-F}} = 7.8$  Hz), 124.6 (d,  $J_{\text{C-F}} = 4.1$  Hz), 121.5, 114.9 (d,  $^2J_{\text{C-F}} = 19.2$  Hz), 69.0, 21.1 ppm. HRMS (ESI)  $m/z$ :  $[\text{M} + \text{H}]^+$   $\text{C}_9\text{H}_{10}\text{FNO}_2$  184.0774; Found 184.0765.

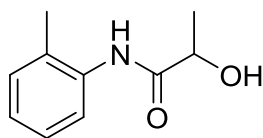

**2-Hydroxy-N-(o-tolyl)propanamide (2p)**, yellow oil, purification by flash column chromatography (eluent: Petroleum ether/EtOAc = 2/1), 23 mg (65% yield).  $^1\text{H}$  NMR (400 MHz,  $\text{CDCl}_3$ ):  $\delta$  8.44 (brs, 1H), 7.92 (d,  $J = 7.6$  Hz, 1H), 7.23-7.17 (m, 2H), 7.07 (t,  $J = 7.6$  Hz, 1H), 4.37 (q,  $J = 3.2$  Hz, 1H), 3.26 (brs, 1H), 2.26 (s, 3H), 1.53 (d,  $J = 6.8$  Hz, 3H) ppm.  $^{13}\text{C}$  NMR (100 MHz,  $\text{CDCl}_3$ ):  $\delta$  172.7, 135.1, 130.5, 128.7, 126.8, 125.1, 122.2, 69.0, 21.3, 17.5 ppm. HRMS (EI+)  $m/z$ : Calcd for  $\text{C}_{10}\text{H}_{13}\text{NO}_2$  179.0946; Found 179.0947.

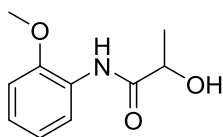

**2-Hydroxy-N-(2-methoxyphenyl)propanamide (2q)**, white soild, purification by flash column chromatography (eluent: Petroleum ether/EtOAc = 2/1), 24 mg (61% yield).  $^1\text{H}$  NMR (400 MHz,  $\text{CDCl}_3$ ):  $\delta$  8.96 (brs, 1H), 8.28 (dd,  $J_1 = 8.0$  Hz,  $J_2 = 1.6$  Hz, 1H), 6.99-6.96 (m, 1H), 6.89-6.85 (m, 1H), 6.80 (dd,  $J_1 = 8.0$  Hz,  $J_2 = 0.8$  Hz, 1H), 4.28 (q,  $J = 6.8$  Hz, 1H), 3.78 (s, 3H), 3.44 (brs, 1H), 1.44 (d,  $J = 6.8$  Hz, 3H) ppm.  $^{13}\text{C}$  NMR (100 MHz,  $\text{CDCl}_3$ ):  $\delta$  172.8, 148.3, 126.9, 124.1, 120.9, 119.7, 110.0, 69.1, 55.7, 21.2 ppm. HRMS (EI+)  $m/z$ : Calcd for  $\text{C}_{10}\text{H}_{13}\text{NO}_3$  195.0895; Found 195.0896.

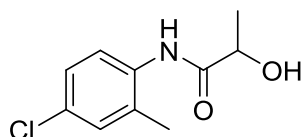

**N-(4-Chloro-2-methylphenyl)-2-hydroxypropanamide (2r)**, white soild, purification by flash column chromatography (eluent: Petroleum ether/EtOAc = 2/1), 25 mg (59% yield).  $^1\text{H}$  NMR (400 MHz,  $\text{CDCl}_3$ ):  $\delta$  8.46 (s, 1H), 7.88 (s,  $J = 9.2$  Hz, 1H), 7.17 (m, 2H), 4.37 (q,  $J = 6.8$  Hz, 1H), 2.23 (s, 3H), 1.52 (d,  $J = 6.4$  Hz, 3H)

ppm.  $^{13}\text{C}$  NMR (150 MHz,  $\text{CDCl}_3$ ):  $\delta$  172.7, 133.7, 130.4, 130.2, 130.0, 126.8, 123.2, 69.0, 21.2, 17.4 ppm. HRMS (ESI)  $m/z$ :  $[\text{M} + \text{H}]^+$   $\text{C}_{10}\text{H}_{13}\text{NO}_2\text{Cl}$  214.0635; Found 214.0631.

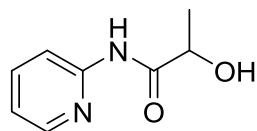

**2-Hydroxy-N-(pyridin-2-yl)propanamide (2s)**, yellow oil, purification by flash column chromatography (eluent: Petroleum ether/EtOAc = 2/1), 18 mg (52% yield).  $^1\text{H}$  NMR (400 MHz,  $\text{CDCl}_3$ ):  $\delta$  9.68 (brs, 1H), 8.31 (d,  $J = 8.4$  Hz, 1H), 8.24 (d,  $J = 4.8$  Hz, 1H), 7.77-7.73 (m, 1H), 7.10-7.07 (m, 1H), 6.41 (brs, 1H), 4.46 (q,  $J = 6.8$  Hz, 1H), 1.57 (d,  $J = 6.8$  Hz, 3H) ppm.  $^{13}\text{C}$  NMR (100 MHz,  $\text{CDCl}_3$ ):  $\delta$  173.8, 150.9, 147.0, 139.1, 120.0, 114.3, 68.5, 21.1 ppm. HRMS (EI+)  $m/z$ : Calcd for  $\text{C}_8\text{H}_{10}\text{N}_2\text{O}_2$  166.0742; Found 166.0741.

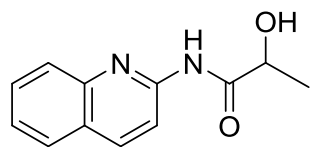

**2-Hydroxy-N-(quinolin-2-yl)propanamide (2t)**, white solid, purification by flash column chromatography (eluent: Petroleum ether/EtOAc = 2/1), 24 mg (56% yield).  $^1\text{H}$  NMR (600 MHz,  $\text{CDCl}_3$ ):  $\delta$  9.66 (brs, 1H), 8.51 (d,  $J = 8.4$  Hz, 1H), 8.22 (d,  $J = 8.0$  Hz, 1H), 7.84-7.80 (m, 2H), 7.72-7.69 (m, 1H), 7.50-7.47 (m, 1H), 5.10 (brs, 1H), 4.53 (q,  $J = 6.6$  Hz, 1H), 1.63 (d,  $J = 6.6$  Hz, 3H) ppm.  $^{13}\text{C}$  NMR (150 MHz,  $\text{CDCl}_3$ ):  $\delta$  173.7, 150.6, 146.1, 139.2, 130.4, 127.7, 126.9, 126.4, 125.5, 114.2, 68.7, 21.4 ppm. HRMS (ESI)  $m/z$ :  $[\text{M} + \text{H}]^+$   $\text{C}_{12}\text{H}_{13}\text{N}_2\text{O}_2$  217.0949; Found 217.0932.

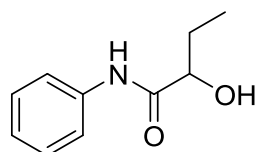

**2-Hydroxy-N-phenylbutanamide (2u)**,<sup>[5]</sup> white solid, purification by flash column

chromatography (eluent: Petroleum ether/EtOAc = 2/1), 18 mg (51% yield).  $^1\text{H}$  NMR (400 MHz,  $\text{CDCl}_3$ ):  $\delta$  8.47 (brs, 1H), 7.55 (d,  $J = 7.6$  Hz, 2H), 7.32 (t,  $J = 7.6$  Hz, 2H), 7.12 (t,  $J = 7.6$  Hz, 1H), 4.20 (q,  $J = 4.0$  Hz, 1H), 2.98 (brs, 1H), 2.01-1.91 (m, 1H), 1.84-1.73 (m, 1H), 1.03 (t,  $J = 7.6$  Hz, 3H) ppm.  $^{13}\text{C}$  NMR (100 MHz,  $\text{CDCl}_3$ ):  $\delta$  172.0, 137.2, 129.1, 124.6, 119.8, 73.5, 27.8, 9.2 ppm.

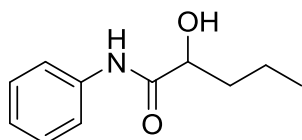

**2-Hydroxy-N-phenylpentanamide (2v)**, white solid, purification by flash column chromatography (eluent: Petroleum ether/EtOAc = 2/1), 19 mg (48% yield).  $^1\text{H}$  NMR (400 MHz,  $\text{CDCl}_3$ ):  $\delta$  8.45 (brs, 1H), 7.56 (d,  $J = 7.6$  Hz, 2H), 7.33 (t,  $J = 8.4$  Hz, 2H), 7.12 (t,  $J = 7.6$  Hz, 1H), 4.27-4.23 (m, 1H), 2.88 (brs, 1H), 1.95-1.87 (m, 1H), 1.78-1.70 (m, 1H), 1.55-1.47 (m, 2H), 0.97 (t,  $J = 7.2$  Hz, 3H) ppm.  $^{13}\text{C}$  NMR (150 MHz,  $\text{CDCl}_3$ ):  $\delta$  172.6, 137.2, 129.0, 124.6, 119.9, 72.3, 36.8, 18.3, 13.8 ppm. HRMS (ESI)  $m/z$ :  $[\text{M} + \text{Na}]^+$   $\text{C}_{11}\text{H}_{15}\text{NNaO}_2$  216.1000; Found 216.0995.

## 5. Synthesis of deuterated $\alpha$ -hydroxy acylamide via C-C bond cleavages

Typical procedure for preparing deuterated products (**2a'** as example):

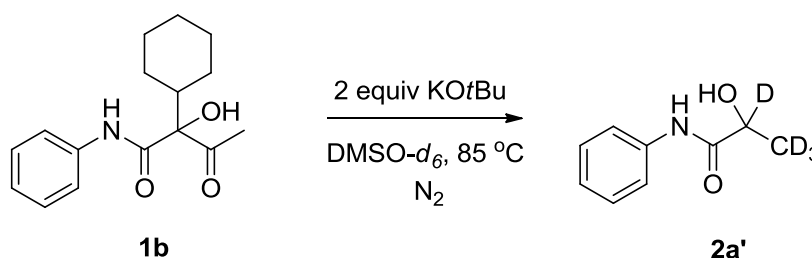

Under  $\text{N}_2$  atmosphere,  $\text{KOtBu}$  (44.8 mg, 0.4 mmol) was dissolved in 1 mL  $\text{DMSO-}d_6$ . Substrate **1b** (55 mg, 0.2 mmol) in 1 mL  $\text{DMSO-}d_6$  was added into the solution. When the reaction finished in 4 h monitored by TLC, the reaction was quenched with 10 mL  $\text{H}_2\text{O}$ . Then the mixture was extracted with  $\text{CH}_2\text{Cl}_2$  (25 mL  $\times$  3), washed sequentially



with saturated sodium chloride solution (50 mL). The combined organic phase was dried over MgSO<sub>4</sub>, filtered and evaporated under reduced pressure. The resulting residue was purified by flash chromatography over silica gel (Petroleum ether/ EtOAc = 2:1) to give **2a'** as a white solid (24 mg, 72% yield).

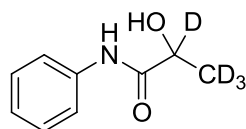

**2-Hydroxy-N-phenyl-2,3-d<sub>4</sub>-propanamide (2a')**, white solid, purification by flash column chromatography (eluent: Petroleum ether/EtOAc = 2/1), 25 mg (72% yield). <sup>1</sup>H NMR (600 MHz, CDCl<sub>3</sub>): 8.45 (brs, 1H), 7.60-7.58 (m, 2H), 7.38-7.34 (m, 2H), 7.17-7.14 (m, 1H), 4.40 (m, 0.07H), 2.67 (brs, 1H), 1.53 (m, 0.07H) ppm. <sup>13</sup>C NMR (150 MHz, CDCl<sub>3</sub>): δ 172.2, 137.2, 129.1, 124.5, 119.8, 68.6 (m), 20.3 (m) ppm. HRMS (ESI) m/z: [M + H]<sup>+</sup> C<sub>9</sub>H<sub>8</sub>D<sub>4</sub>NO<sub>2</sub> 170.1119; Found 170.1113.

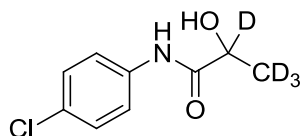

**N-(4-Chlorophenyl)-2-hydroxy-2,3-d<sub>4</sub>-propanamide (2f')**, yellow solid, purification by flash column chromatography (eluent: Petroleum ether/EtOAc = 2/1), 25 mg (60% yield). <sup>1</sup>H NMR (400 MHz, CDCl<sub>3</sub>): δ 8.59 (brs, 1H), 7.49 (d, *J* = 8.4 Hz, 2H), 7.27 (d, *J* = 8.4 Hz, 2H), 4.33 (m, 0.07H), 3.37 (brs, 1H), 1.46 (m, 0.08H) ppm. <sup>13</sup>C NMR (150 MHz, CDCl<sub>3</sub>): δ 172.9, 135.7, 129.6, 129.1, 121.1, 68.5 (m), 20.4 (m) ppm. HRMS (ESI) m/z: [M + H]<sup>+</sup> C<sub>9</sub>H<sub>7</sub>D<sub>4</sub>ClNO<sub>2</sub> 204.0729; Found 204.0722.

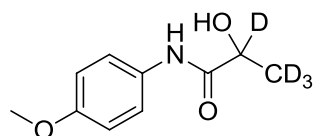

**2-Hydroxy-N-(4-methoxyphenyl)-2,3-d<sub>4</sub>-propanamide (2j')**, yellow solid, purification by flash column chromatography (eluent: Petroleum ether/EtOAc = 2/1),

26 mg (64% yield).  $^1\text{H}$  NMR (400 MHz,  $\text{CDCl}_3$ ):  $\delta$  8.43 (brs, 1H), 7.44 (d,  $J = 8.8$  Hz, 2H), 6.85 (d,  $J = 8.8$  Hz, 2H), 4.31 (m, 0.05H), 3.78 (s, 3H), 3.33 (brs, 1H), 1.46 (m, 0.1H) ppm.  $^{13}\text{C}$  NMR (150 MHz,  $\text{CDCl}_3$ ):  $\delta$  172.6, 156.6, 130.3, 121.6, 114.1, 68.4 (m), 55.5, 20.3 (m) ppm. HRMS (ESI)  $m/z$ :  $[\text{M} + \text{H}]^+$   $\text{C}_{10}\text{H}_{10}\text{D}_4\text{NO}_2$  200.1225; Found 200.1229.

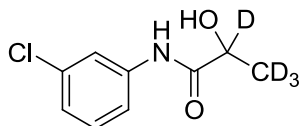

***N*-(3-Chlorophenyl)-2-hydroxy-2,3-*d*<sub>4</sub>-propanamide (2l')**, white solid, purification by flash column chromatography (eluent: Petroleum ether/EtOAc = 2/1), 23 mg (55% yield).  $^1\text{H}$  NMR (400 MHz,  $\text{CDCl}_3$ ):  $\delta$  8.51 (brs, 1H), 7.71 (t,  $J = 1.2$  Hz, 1H), 7.41 (d,  $J = 6.0$  Hz, 1H), 7.25 (t,  $J = 6.8$  Hz, 1H), 7.10 (d,  $J = 6.0$  Hz, 1H), 4.38 (m, 0.09H), 2.73 (brs, 1H), 1.50 (m, 0.12H) ppm.  $^{13}\text{C}$  NMR (150 MHz,  $\text{CDCl}_3$ ):  $\delta$  172.3, 138.3, 134.7, 130.0, 124.5, 119.8, 117.6, 68.6 (m), 20.2 (m) ppm. HRMS (ESI)  $m/z$ :  $[\text{M} + \text{H}]^+$   $\text{C}_9\text{H}_7\text{D}_4\text{ClNO}_2$  204.0729; Found 204.0719.

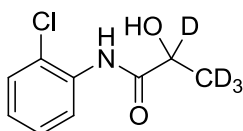

***N*-(2-Chlorophenyl)-2-hydroxy-2,3-*d*<sub>4</sub>-propanamide (2n')**, yellow solid, purification by flash column chromatography (eluent: Petroleum ether/EtOAc = 2/1), 28 mg (69% yield).  $^1\text{H}$  NMR (400 MHz,  $\text{CDCl}_3$ ):  $\delta$  9.10 (s, 1H), 8.41 (dd,  $J_1 = 8.0$  Hz,  $J_2 = 1.2$  Hz, 1H), 7.38 (dd,  $J_1 = 8.0$  Hz,  $J_2 = 1.2$  Hz, 1H), 7.30-7.26 (m, 1H), 7.08-7.03 (m, 1H), 4.42 (m, 0.09H), 2.85 (s, 1H), 1.56 (m, 0.04H) ppm.  $^{13}\text{C}$  NMR (150 MHz,  $\text{CDCl}_3$ ):  $\delta$  172.5, 134.1, 129.1, 127.7, 124.9, 123.2, 121.2, 68.8 (m), 20.3 (m) ppm. HRMS (ESI)  $m/z$ :  $[\text{M} + \text{H}]^+$   $\text{C}_9\text{H}_7\text{D}_4\text{ClNO}_2$  204.0729; Found 204.0723.

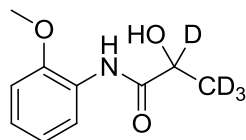

**2-Hydroxy-N-(2-methoxyphenyl)-2,3-*d*<sub>4</sub>-propanamide (2q')**, white solid, purification by flash column chromatography (eluent: Petroleum ether/EtOAc = 2/1), 25 mg (62% yield). <sup>1</sup>H NMR (400 MHz, CDCl<sub>3</sub>): 9.04 (brs, 1H), 8.36-8.33 (m, 1H), 7.07-7.03 (m, 1H), 6.96-6.92 (m, 1H), 6.88-6.85 (m, 1H), 4.37 (m, 0.04H), 3.85 (s, 3H), 3.53 (brs, 1H), 1.47 (s, 0.05H) ppm. <sup>13</sup>C NMR (150 MHz, CDCl<sub>3</sub>): δ 172.9, 148.4, 126.9, 124.2, 121.0, 120.0, 110.0, 68.7 (m), 55.7, 20.4 (m) ppm. HRMS (ESI) m/z: [M + H]<sup>+</sup> C<sub>10</sub>H<sub>10</sub>D<sub>4</sub>NO<sub>2</sub> 200.1225; Found 200.1222.

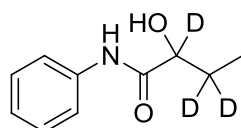

**2-Hydroxy-N-phenyl-2,3-*d*<sub>3</sub>-butanamide (2v')**, white solid, purification by flash column chromatography (eluent: Petroleum ether/EtOAc = 2/1), 18 mg (49% yield). <sup>1</sup>H NMR (400 MHz, CDCl<sub>3</sub>): 8.40 (brs, 1H), 7.57 (d, *J* = 7.6 Hz, 2H), 7.34 (t, *J* = 8.0 Hz, 2H), 7.13 (t, *J* = 7.6 Hz, 1H), 4.22 (m, 0.07H), 2.64 (brs, 1H), 2.24-2.20 (m, 0.08H), 2.02-2.00 (m, 0.1H), 1.02 (s, 3H) ppm. <sup>13</sup>C NMR (150 MHz, CDCl<sub>3</sub>): δ 171.6, 137.2, 129.1, 124.5, 119.8, 73.1 (m), 27.1 (m), 8.9 ppm. HRMS (ESI) m/z: [M + Na]<sup>+</sup> C<sub>10</sub>H<sub>10</sub>D<sub>3</sub>NO<sub>2</sub>Na 205.1032; Found 205.1041.

## 6. Mechanistic Study

### 6.1 TEMPO as additive

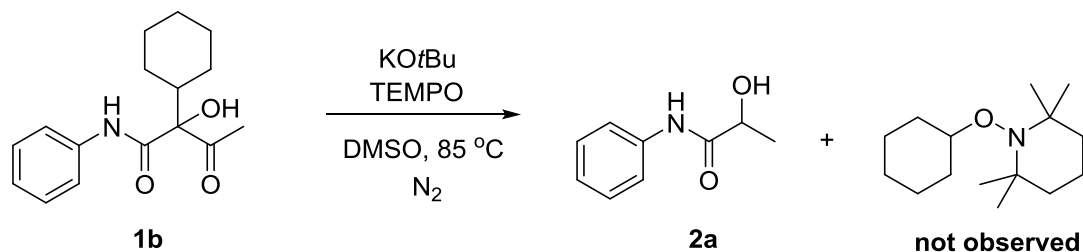

Under N<sub>2</sub> atmosphere, KO<sup>t</sup>Bu (44.8 mg, 0.4 mmol) and TEMPO (62.5 mg, 0.4 mmol) were dissolved in 2 mL DMSO. Substrate **1b** (55 mg, 0.2 mmol) was added into the solution. When the reaction finished in 4 h, the reaction was quenched with 10 mL H<sub>2</sub>O. Then the mixture was extracted with CH<sub>2</sub>Cl<sub>2</sub> (25 mL × 3), washed sequentially with saturated sodium chloride solution (50 mL). The combined organic phase was dried over MgSO<sub>4</sub>, filtered and evaporated under reduced pressure. The resulting residue was purified by flash chromatography over silica gel (Petroleum ether/ EtOAc = 2:1) to give **2a** as a white solid (16.5 mg, 51% yield), and no 1-(cyclohexyloxy)-2,2,6,6-tetramethylpiperidine was found in the reaction system by EI-MS.<sup>[6]</sup>

## 6.2 Ethene-1,1-diylidibenzene as additive

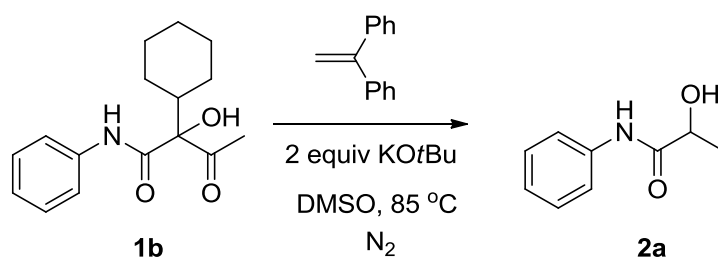

Under N<sub>2</sub> atmosphere, KO<sup>t</sup>Bu (44.8 mg, 0.4 mmol) and ethene-1,1-diylidibenzene (108 mg, 0.6 mmol) were dissolved in 2 mL DMSO. Substrate **1b** (55 mg, 0.2 mmol) was added into the solution. When the reaction finished in 4 h, the reaction was quenched with 10 mL H<sub>2</sub>O. Then the mixture was extracted with CH<sub>2</sub>Cl<sub>2</sub> (25 mL × 3), washed sequentially with saturated sodium chloride solution (50 mL). The combined organic phase was dried over MgSO<sub>4</sub>, filtered and evaporated under reduced pressure. The resulting residue was purified by flash chromatography over silica gel (Petroleum ether/ EtOAc = 2:1) to give **2a** as a white solid (20 mg, 61% yield). It showed no effect on the yield.

### 6.3 EPR experiments

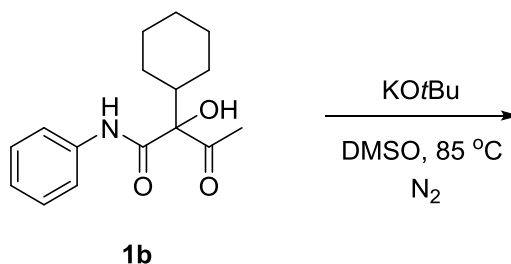

The two oven-dried schlenk tubes equipped with a stir bar were loaded with DMSO (2 mL), and KO $t$ Bu (44.8 mg, 0.4 mmol) and substrate **1b** (55 mg, 0.2 mmol), respectively. The two mixtures were stirred under standard condition for 2 hours, followed by the addition of 5,5-dimethyl 1-pyridine  $N$ -oxide (DMPO) (45 mg, 0.4 mmol) to the second solution. Two solutions were stirred for another five minutes with sampling and analyzing by EPR respectively.

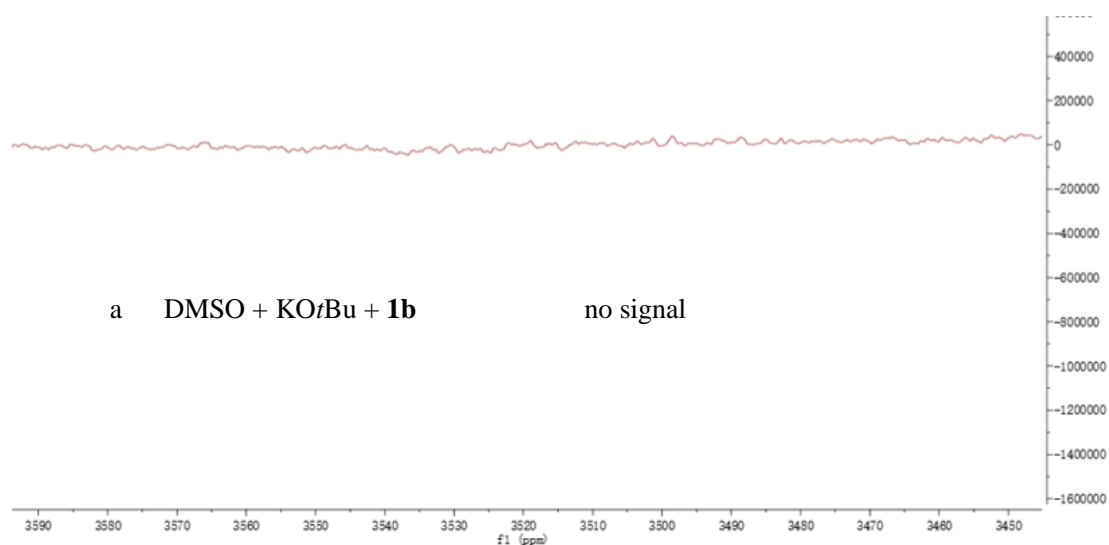

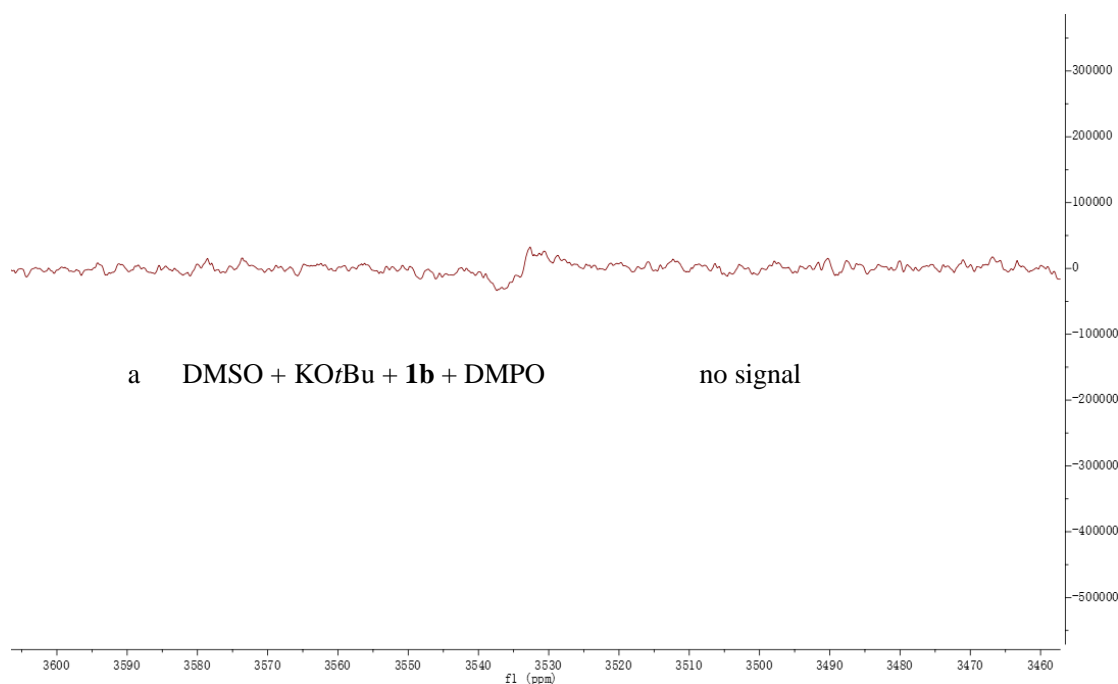

**Figure S1.** The EPR spectrum.

#### 6.4 H<sub>2</sub><sup>18</sup>O as additive

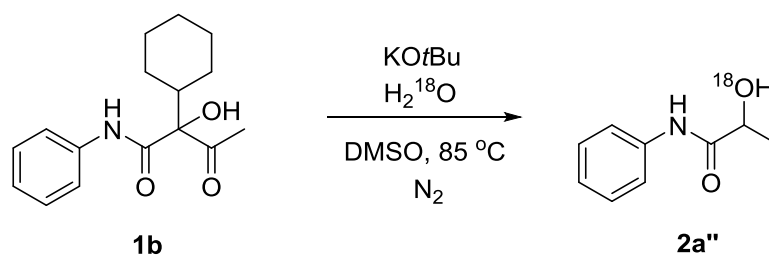

Under N<sub>2</sub> atmosphere, KO<sup>t</sup>Bu (44.8 mg, 0.4 mmol) and H<sub>2</sub><sup>18</sup>O (12 mg, 0.6 mmol) were dissolved in 2 mL DMSO. Substrate **1b** (55 mg, 0.2 mmol) was added into the solution. When the reaction finished in 4 h monitored by TLC, the reaction was quenched with 10 mL H<sub>2</sub>O. Then the mixture was extracted with CH<sub>2</sub>Cl<sub>2</sub> (25 mL × 3), washed sequentially with saturated sodium chloride solution (50 mL). The combined organic phase was dried over MgSO<sub>4</sub>, filtered and evaporated under reduced pressure. The resulting residue was purified by flash chromatography over silica gel (Petroleum ether/ EtOAc = 2:1) to give **2a''** as a white solid.

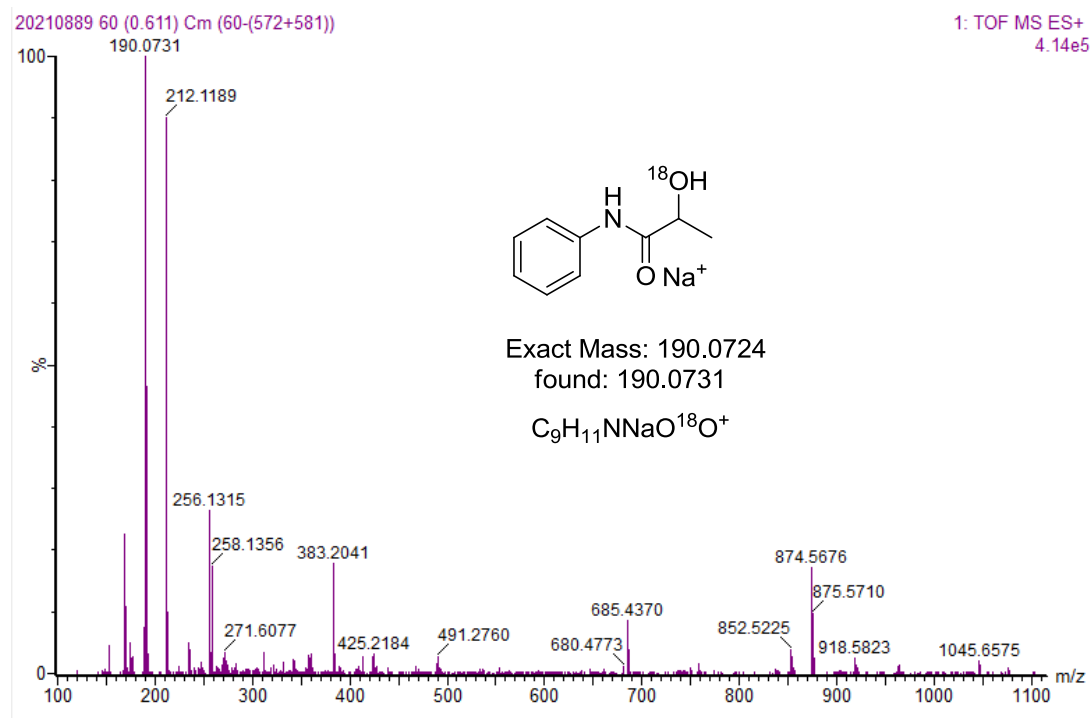

**Figure S2.** ESI-MS spectrum of **2a''**.

## 6.5 GC-MS study

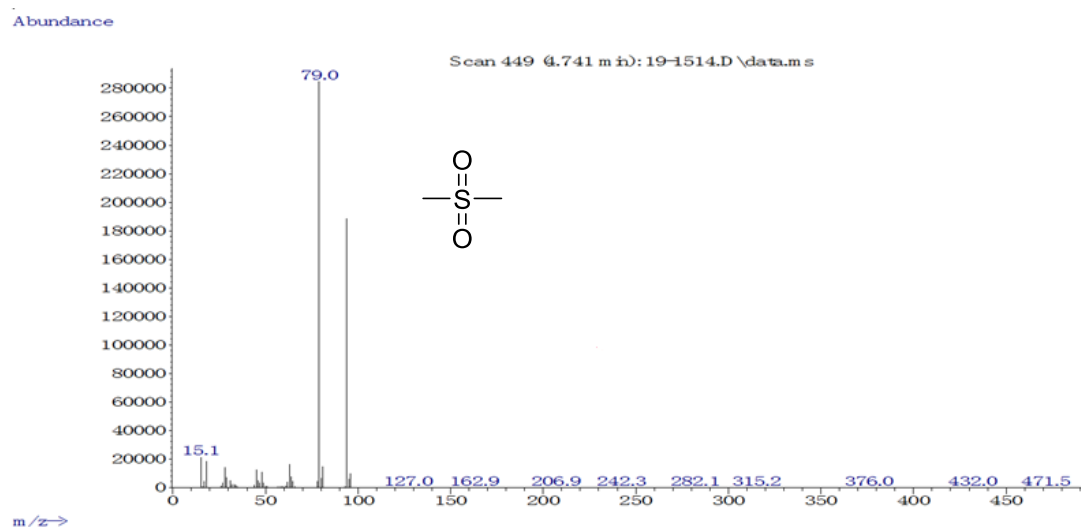

**Figure S3.** (Methylsulfonyl)methane and leaving unit detected by GC-MS

## 6.6 Crossover experiment

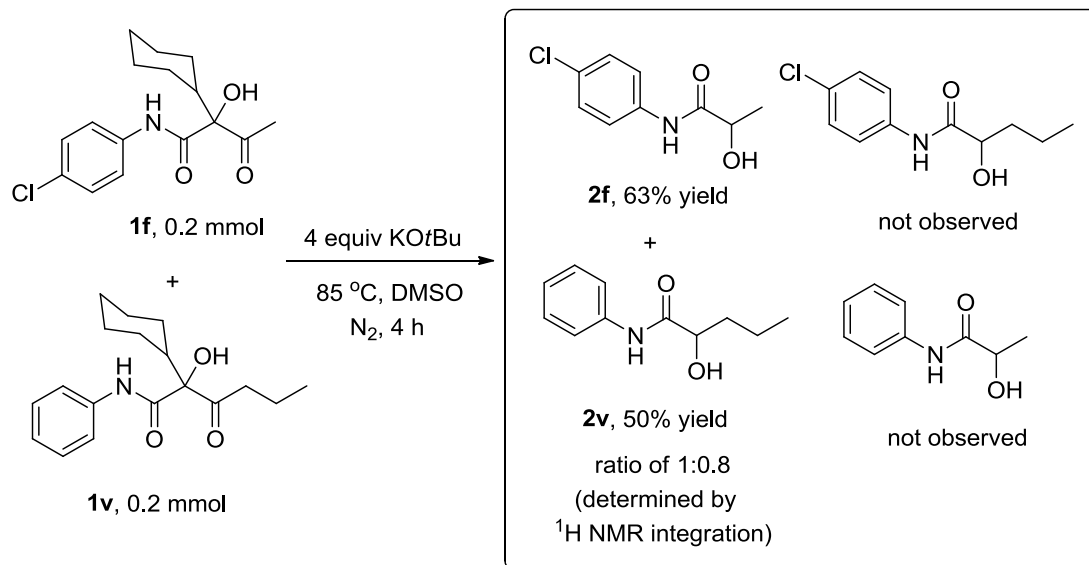

Under N<sub>2</sub> atmosphere, KOtBu (89 mg, 0.8 mmol), **1f** (62 mg, 0.2 mmol) and **1v** (61 mg, 0.2 mmol) were dissolved in 2 mL DMSO. The mixtures were stirred under standard condition for 4 h. After that, the reaction was quenched with 10 mL H<sub>2</sub>O. Then the mixture was extracted with CH<sub>2</sub>Cl<sub>2</sub> (25 mL × 3), washed sequentially with saturated sodium chloride solution (50 mL). The combined organic phase was dried over MgSO<sub>4</sub>, filtered and evaporated under reduced pressure. The resulting residue was purified by flash chromatography over silica gel (Petroleum ether/ EtOAc = 2:1) to give the mixture of **2f** and **2v**. The yields of **2f** and **2v** were determined by <sup>1</sup>H NMR analysis.



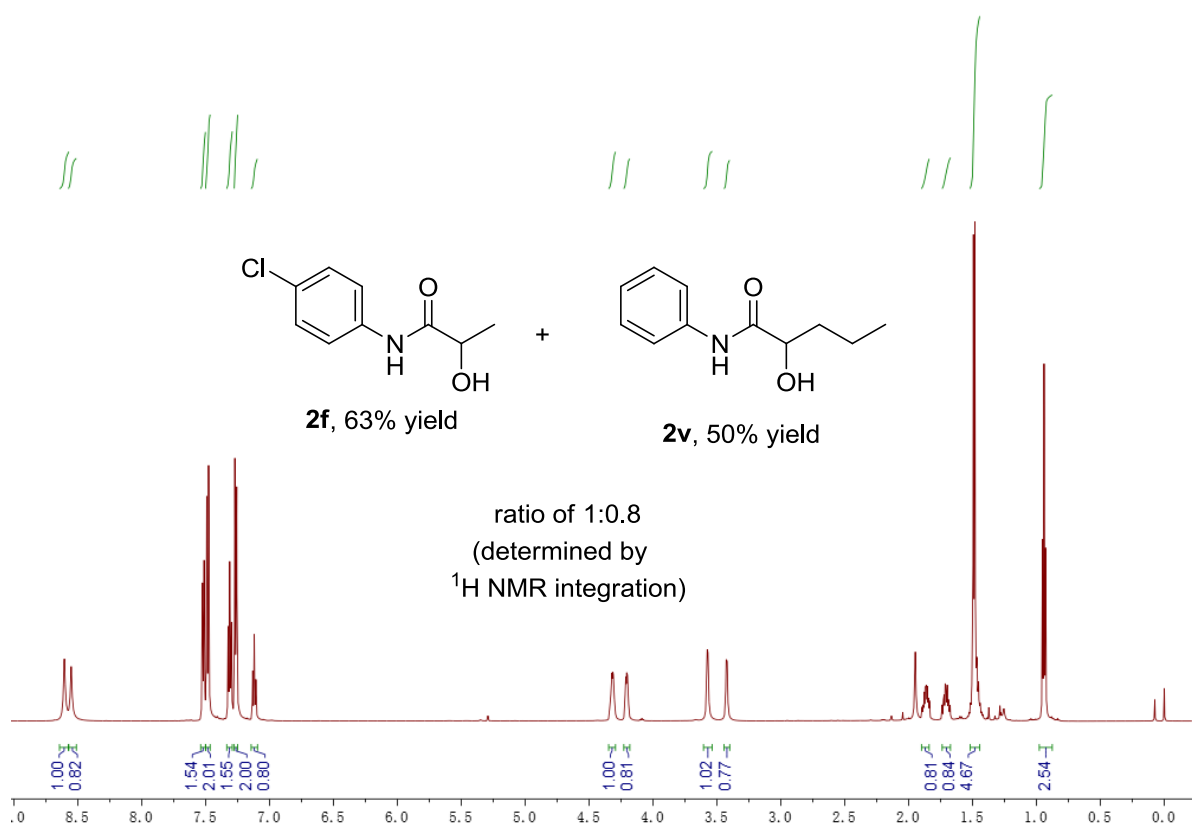

**Figure S4.**  $^1\text{H}$  NMR analysis of the mixture of **2f** and

## 7. X-ray structure of 1b.

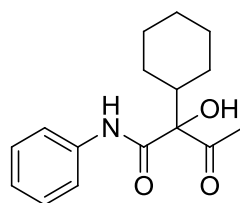

**1b**

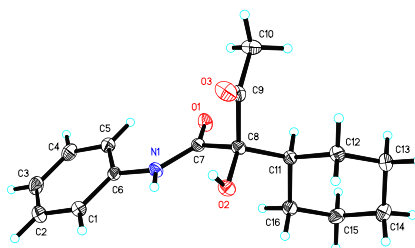

Table 1. Crystal data and structure refinement for d8v20635.

|                                 |                                                  |                    |
|---------------------------------|--------------------------------------------------|--------------------|
| Identification code             | d8v20635                                         |                    |
| Empirical formula               | C <sub>16</sub> H <sub>21</sub> N O <sub>3</sub> |                    |
| Formula weight                  | 275.34                                           |                    |
| Temperature                     | 193(2) K                                         |                    |
| Wavelength                      | 0.71073 Å                                        |                    |
| Crystal system                  | Monoclinic                                       |                    |
| Space group                     | P 2 <sub>1</sub> /c                              |                    |
| Unit cell dimensions            | a = 17.3280(6) Å                                 | α = 90°.           |
|                                 | b = 5.5386(2) Å                                  | β = 115.7840(10)°. |
|                                 | c = 17.0245(6) Å                                 | γ = 90°.           |
| Volume                          | 1471.22(9) Å <sup>3</sup>                        |                    |
| Z                               | 4                                                |                    |
| Density (calculated)            | 1.243 Mg/m <sup>3</sup>                          |                    |
| Absorption coefficient          | 0.085 mm <sup>-1</sup>                           |                    |
| F(000)                          | 592                                              |                    |
| Crystal size                    | 0.200 x 0.140 x 0.120 mm <sup>3</sup>            |                    |
| Theta range for data collection | 2.801 to 25.998°.                                |                    |
| Index ranges                    | -21 ≤ h ≤ 16, -6 ≤ k ≤ 6, -17 ≤ l ≤ 20           |                    |
| Reflections collected           | 6846                                             |                    |
| Independent reflections         | 2873 [R(int) = 0.0220]                           |                    |
| Completeness to theta = 25.242° | 98.8 %                                           |                    |

|                                   |                                             |
|-----------------------------------|---------------------------------------------|
| Absorption correction             | Semi-empirical from equivalents             |
| Max. and min. transmission        | 0.7456 and 0.6747                           |
| Refinement method                 | Full-matrix least-squares on F <sup>2</sup> |
| Data / restraints / parameters    | 2873 / 0 / 184                              |
| Goodness-of-fit on F <sup>2</sup> | 1.025                                       |
| Final R indices [I>2sigma(I)]     | R1 = 0.0371, wR2 = 0.0891                   |
| R indices (all data)              | R1 = 0.0443, wR2 = 0.0952                   |
| Extinction coefficient            | 0.034(6)                                    |
| Largest diff. peak and hole       | 0.241 and -0.175 e.Å <sup>-3</sup>          |

Table 2. Atomic coordinates ( $\times 10^4$ ) and equivalent isotropic displacement parameters ( $\text{\AA}^2 \times 10^3$ ) for d8v20635.  $U(\text{eq})$  is defined as one third of the trace of the orthogonalized  $U^{ij}$  tensor.

|       | x       | y        | z       | U(eq) |
|-------|---------|----------|---------|-------|
| O(1)  | 2485(1) | 10165(2) | 1690(1) | 33(1) |
| O(2)  | 2409(1) | 4451(2)  | 2619(1) | 29(1) |
| O(3)  | 988(1)  | 4023(2)  | 1228(1) | 39(1) |
| N(1)  | 3231(1) | 6654(2)  | 1867(1) | 25(1) |
| C(1)  | 4515(1) | 5641(2)  | 1752(1) | 31(1) |
| C(2)  | 5155(1) | 6128(3)  | 1497(1) | 41(1) |
| C(3)  | 5145(1) | 8250(3)  | 1065(1) | 43(1) |
| C(4)  | 4478(1) | 9858(3)  | 877(1)  | 39(1) |
| C(5)  | 3828(1) | 9402(2)  | 1127(1) | 31(1) |
| C(6)  | 3854(1) | 7286(2)  | 1575(1) | 25(1) |
| C(7)  | 2608(1) | 8039(2)  | 1904(1) | 24(1) |
| C(8)  | 2025(1) | 6657(2)  | 2231(1) | 24(1) |
| C(9)  | 1172(1) | 6114(2)  | 1420(1) | 27(1) |
| C(10) | 614(1)  | 8137(3)  | 907(1)  | 37(1) |
| C(11) | 1872(1) | 8228(2)  | 2899(1) | 24(1) |
| C(12) | 1203(1) | 7141(3)  | 3158(1) | 33(1) |
| C(13) | 1055(1) | 8802(3)  | 3794(1) | 42(1) |
| C(14) | 1885(1) | 9280(3)  | 4606(1) | 44(1) |
| C(15) | 2571(1) | 10288(3) | 4369(1) | 38(1) |
| C(16) | 2711(1) | 8674(3)  | 3716(1) | 32(1) |

Table 3. Bond lengths [ $\text{\AA}$ ] and angles [ $^\circ$ ] for d8v20635.

---

|              |            |
|--------------|------------|
| O(1)-C(7)    | 1.2233(15) |
| O(2)-C(8)    | 1.4112(14) |
| O(2)-H(2)    | 0.8400     |
| O(3)-C(9)    | 1.2078(15) |
| N(1)-C(7)    | 1.3475(15) |
| N(1)-C(6)    | 1.4156(15) |
| N(1)-H(1)    | 0.8800     |
| C(1)-C(2)    | 1.3825(19) |
| C(1)-C(6)    | 1.3892(17) |
| C(1)-H(1A)   | 0.9500     |
| C(2)-C(3)    | 1.382(2)   |
| C(2)-H(2A)   | 0.9500     |
| C(3)-C(4)    | 1.381(2)   |
| C(3)-H(3)    | 0.9500     |
| C(4)-C(5)    | 1.3891(19) |
| C(4)-H(4)    | 0.9500     |
| C(5)-C(6)    | 1.3886(18) |
| C(5)-H(5)    | 0.9500     |
| C(7)-C(8)    | 1.5516(16) |
| C(8)-C(11)   | 1.5426(16) |
| C(8)-C(9)    | 1.5505(17) |
| C(9)-C(10)   | 1.4895(18) |
| C(10)-H(10A) | 0.9800     |
| C(10)-H(10B) | 0.9800     |
| C(10)-H(10C) | 0.9800     |
| C(11)-C(12)  | 1.5329(16) |
| C(11)-C(16)  | 1.5330(17) |
| C(11)-H(11)  | 1.0000     |
| C(12)-C(13)  | 1.5252(19) |
| C(12)-H(12A) | 0.9900     |
| C(12)-H(12B) | 0.9900     |
| C(13)-C(14)  | 1.523(2)   |
| C(13)-H(13A) | 0.9900     |
| C(13)-H(13B) | 0.9900     |
| C(14)-C(15)  | 1.518(2)   |
| C(14)-H(14A) | 0.9900     |
| C(14)-H(14B) | 0.9900     |

|                 |            |
|-----------------|------------|
| C(15)-C(16)     | 1.5251(19) |
| C(15)-H(15A)    | 0.9900     |
| C(15)-H(15B)    | 0.9900     |
| C(16)-H(16A)    | 0.9900     |
| C(16)-H(16B)    | 0.9900     |
| <br>            |            |
| C(8)-O(2)-H(2)  | 109.5      |
| C(7)-N(1)-C(6)  | 128.69(10) |
| C(7)-N(1)-H(1)  | 115.7      |
| C(6)-N(1)-H(1)  | 115.7      |
| C(2)-C(1)-C(6)  | 120.11(13) |
| C(2)-C(1)-H(1A) | 119.9      |
| C(6)-C(1)-H(1A) | 119.9      |
| C(3)-C(2)-C(1)  | 120.44(13) |
| C(3)-C(2)-H(2A) | 119.8      |
| C(1)-C(2)-H(2A) | 119.8      |
| C(4)-C(3)-C(2)  | 119.21(13) |
| C(4)-C(3)-H(3)  | 120.4      |
| C(2)-C(3)-H(3)  | 120.4      |
| C(3)-C(4)-C(5)  | 121.24(13) |
| C(3)-C(4)-H(4)  | 119.4      |
| C(5)-C(4)-H(4)  | 119.4      |
| C(6)-C(5)-C(4)  | 119.03(12) |
| C(6)-C(5)-H(5)  | 120.5      |
| C(4)-C(5)-H(5)  | 120.5      |
| C(5)-C(6)-C(1)  | 119.95(11) |
| C(5)-C(6)-N(1)  | 123.66(11) |
| C(1)-C(6)-N(1)  | 116.39(11) |
| O(1)-C(7)-N(1)  | 124.96(11) |
| O(1)-C(7)-C(8)  | 121.69(10) |
| N(1)-C(7)-C(8)  | 113.34(10) |
| O(2)-C(8)-C(11) | 109.91(9)  |
| O(2)-C(8)-C(9)  | 108.80(9)  |
| C(11)-C(8)-C(9) | 111.31(9)  |
| O(2)-C(8)-C(7)  | 110.26(9)  |
| C(11)-C(8)-C(7) | 109.45(9)  |
| C(9)-C(8)-C(7)  | 107.08(9)  |
| O(3)-C(9)-C(10) | 122.36(12) |

|                     |            |
|---------------------|------------|
| O(3)-C(9)-C(8)      | 117.63(11) |
| C(10)-C(9)-C(8)     | 120.01(10) |
| C(9)-C(10)-H(10A)   | 109.5      |
| C(9)-C(10)-H(10B)   | 109.5      |
| H(10A)-C(10)-H(10B) | 109.5      |
| C(9)-C(10)-H(10C)   | 109.5      |
| H(10A)-C(10)-H(10C) | 109.5      |
| H(10B)-C(10)-H(10C) | 109.5      |
| C(12)-C(11)-C(16)   | 109.81(10) |
| C(12)-C(11)-C(8)    | 112.58(10) |
| C(16)-C(11)-C(8)    | 111.19(10) |
| C(12)-C(11)-H(11)   | 107.7      |
| C(16)-C(11)-H(11)   | 107.7      |
| C(8)-C(11)-H(11)    | 107.7      |
| C(13)-C(12)-C(11)   | 110.46(11) |
| C(13)-C(12)-H(12A)  | 109.6      |
| C(11)-C(12)-H(12A)  | 109.6      |
| C(13)-C(12)-H(12B)  | 109.6      |
| C(11)-C(12)-H(12B)  | 109.6      |
| H(12A)-C(12)-H(12B) | 108.1      |
| C(14)-C(13)-C(12)   | 111.40(11) |
| C(14)-C(13)-H(13A)  | 109.3      |
| C(12)-C(13)-H(13A)  | 109.3      |
| C(14)-C(13)-H(13B)  | 109.3      |
| C(12)-C(13)-H(13B)  | 109.3      |
| H(13A)-C(13)-H(13B) | 108.0      |
| C(15)-C(14)-C(13)   | 111.21(11) |
| C(15)-C(14)-H(14A)  | 109.4      |
| C(13)-C(14)-H(14A)  | 109.4      |
| C(15)-C(14)-H(14B)  | 109.4      |
| C(13)-C(14)-H(14B)  | 109.4      |
| H(14A)-C(14)-H(14B) | 108.0      |
| C(14)-C(15)-C(16)   | 111.69(12) |
| C(14)-C(15)-H(15A)  | 109.3      |
| C(16)-C(15)-H(15A)  | 109.3      |
| C(14)-C(15)-H(15B)  | 109.3      |
| C(16)-C(15)-H(15B)  | 109.3      |
| H(15A)-C(15)-H(15B) | 107.9      |

|                     |            |
|---------------------|------------|
| C(15)-C(16)-C(11)   | 111.54(10) |
| C(15)-C(16)-H(16A)  | 109.3      |
| C(11)-C(16)-H(16A)  | 109.3      |
| C(15)-C(16)-H(16B)  | 109.3      |
| C(11)-C(16)-H(16B)  | 109.3      |
| H(16A)-C(16)-H(16B) | 108.0      |

---

Symmetry transformations used to generate equivalent atoms:

Table 4. Anisotropic displacement parameters ( $\text{\AA}^2 \times 10^3$ ) for d8v20635. The anisotropic displacement factor exponent takes the form:  $-2\pi^2 [ h^2 a^{*2} U^{11} + \dots + 2 h k a^* b^* U^{12} ]$

|       | $U^{11}$ | $U^{22}$ | $U^{33}$ | $U^{23}$ | $U^{13}$ | $U^{12}$ |
|-------|----------|----------|----------|----------|----------|----------|
| O(1)  | 39(1)    | 22(1)    | 46(1)    | 4(1)     | 26(1)    | 5(1)     |
| O(2)  | 31(1)    | 21(1)    | 35(1)    | 4(1)     | 14(1)    | 4(1)     |
| O(3)  | 32(1)    | 27(1)    | 51(1)    | -8(1)    | 11(1)    | -3(1)    |
| N(1)  | 25(1)    | 22(1)    | 30(1)    | 3(1)     | 14(1)    | 2(1)     |
| C(1)  | 30(1)    | 35(1)    | 30(1)    | 1(1)     | 14(1)    | 4(1)     |
| C(2)  | 32(1)    | 55(1)    | 41(1)    | 0(1)     | 19(1)    | 8(1)     |
| C(3)  | 38(1)    | 61(1)    | 40(1)    | -2(1)    | 26(1)    | -4(1)    |
| C(4)  | 47(1)    | 42(1)    | 34(1)    | 2(1)     | 24(1)    | -5(1)    |
| C(5)  | 34(1)    | 33(1)    | 29(1)    | 1(1)     | 15(1)    | 1(1)     |
| C(6)  | 23(1)    | 30(1)    | 22(1)    | -4(1)    | 10(1)    | -1(1)    |
| C(7)  | 24(1)    | 24(1)    | 22(1)    | -2(1)    | 9(1)     | 0(1)     |
| C(8)  | 24(1)    | 20(1)    | 28(1)    | 2(1)     | 11(1)    | 2(1)     |
| C(9)  | 26(1)    | 26(1)    | 30(1)    | -3(1)    | 14(1)    | -1(1)    |
| C(10) | 32(1)    | 33(1)    | 33(1)    | 1(1)     | 4(1)     | 2(1)     |
| C(11) | 24(1)    | 25(1)    | 26(1)    | 1(1)     | 11(1)    | 1(1)     |
| C(12) | 26(1)    | 40(1)    | 34(1)    | 2(1)     | 15(1)    | -1(1)    |
| C(13) | 34(1)    | 60(1)    | 38(1)    | 3(1)     | 22(1)    | 8(1)     |
| C(14) | 47(1)    | 60(1)    | 31(1)    | 0(1)     | 21(1)    | 8(1)     |
| C(15) | 40(1)    | 44(1)    | 27(1)    | -3(1)    | 11(1)    | 0(1)     |
| C(16) | 25(1)    | 40(1)    | 29(1)    | -2(1)    | 11(1)    | -2(1)    |

Table 5. Hydrogen coordinates ( $\times 10^4$ ) and isotropic displacement parameters ( $\text{\AA}^2 \times 10^3$ ) for d8v20635.

|        | x    | y     | z    | U(eq) |
|--------|------|-------|------|-------|
| H(2)   | 2183 | 3317  | 2266 | 44    |
| H(1)   | 3252 | 5157  | 2048 | 31    |
| H(1A)  | 4526 | 4179  | 2049 | 38    |
| H(2A)  | 5605 | 4997  | 1620 | 50    |
| H(3)   | 5591 | 8597  | 900  | 52    |
| H(4)   | 4464 | 11304 | 571  | 47    |
| H(5)   | 3373 | 10520 | 993  | 38    |
| H(10A) | 150  | 7499  | 374  | 55    |
| H(10B) | 955  | 9288  | 753  | 55    |
| H(10C) | 369  | 8956  | 1257 | 55    |
| H(11)  | 1652 | 9830  | 2620 | 29    |
| H(12A) | 657  | 6903  | 2630 | 40    |
| H(12B) | 1403 | 5545  | 3434 | 40    |
| H(13A) | 813  | 10354 | 3501 | 50    |
| H(13B) | 633  | 8052  | 3966 | 50    |
| H(14A) | 1774 | 10444 | 4987 | 53    |
| H(14B) | 2091 | 7757  | 4935 | 53    |
| H(15A) | 3116 | 10441 | 4904 | 46    |
| H(15B) | 2399 | 11920 | 4115 | 46    |
| H(16A) | 2952 | 7108  | 3996 | 38    |
| H(16B) | 3131 | 9445  | 3546 | 38    |

Table 6. Torsion angles [°] for d8v20635.

|                     |             |
|---------------------|-------------|
| C(6)-C(1)-C(2)-C(3) | 0.0(2)      |
| C(1)-C(2)-C(3)-C(4) | -1.2(2)     |
| C(2)-C(3)-C(4)-C(5) | 1.1(2)      |
| C(3)-C(4)-C(5)-C(6) | 0.1(2)      |
| C(4)-C(5)-C(6)-C(1) | -1.28(18)   |
| C(4)-C(5)-C(6)-N(1) | 179.40(11)  |
| C(2)-C(1)-C(6)-C(5) | 1.23(18)    |
| C(2)-C(1)-C(6)-N(1) | -179.40(12) |
| C(7)-N(1)-C(6)-C(5) | -11.86(19)  |



|                         |             |
|-------------------------|-------------|
| C(7)-N(1)-C(6)-C(1)     | 168.79(11)  |
| C(6)-N(1)-C(7)-O(1)     | -0.80(19)   |
| C(6)-N(1)-C(7)-C(8)     | 177.73(10)  |
| O(1)-C(7)-C(8)-O(2)     | -166.60(11) |
| N(1)-C(7)-C(8)-O(2)     | 14.81(13)   |
| O(1)-C(7)-C(8)-C(11)    | -45.59(15)  |
| N(1)-C(7)-C(8)-C(11)    | 135.82(10)  |
| O(1)-C(7)-C(8)-C(9)     | 75.19(13)   |
| N(1)-C(7)-C(8)-C(9)     | -103.40(11) |
| O(2)-C(8)-C(9)-O(3)     | -2.80(15)   |
| C(11)-C(8)-C(9)-O(3)    | -124.06(12) |
| C(7)-C(8)-C(9)-O(3)     | 116.36(12)  |
| O(2)-C(8)-C(9)-C(10)    | 177.43(11)  |
| C(11)-C(8)-C(9)-C(10)   | 56.17(15)   |
| C(7)-C(8)-C(9)-C(10)    | -63.42(14)  |
| O(2)-C(8)-C(11)-C(12)   | -66.70(12)  |
| C(9)-C(8)-C(11)-C(12)   | 53.90(13)   |
| C(7)-C(8)-C(11)-C(12)   | 172.08(9)   |
| O(2)-C(8)-C(11)-C(16)   | 57.01(13)   |
| C(9)-C(8)-C(11)-C(16)   | 177.62(10)  |
| C(7)-C(8)-C(11)-C(16)   | -64.21(12)  |
| C(16)-C(11)-C(12)-C(13) | 57.46(14)   |
| C(8)-C(11)-C(12)-C(13)  | -178.07(10) |
| C(11)-C(12)-C(13)-C(14) | -57.51(16)  |
| C(12)-C(13)-C(14)-C(15) | 55.45(17)   |
| C(13)-C(14)-C(15)-C(16) | -53.94(17)  |
| C(14)-C(15)-C(16)-C(11) | 55.00(15)   |
| C(12)-C(11)-C(16)-C(15) | -56.41(14)  |
| C(8)-C(11)-C(16)-C(15)  | 178.31(11)  |

---

Symmetry transformations used to generate equivalent atoms:

Table 7. Hydrogen bonds for d8v20635 [Å and °].

---

| D-H...A | d(D-H) | d(H...A) | d(D...A) | <(DHA) |
|---------|--------|----------|----------|--------|
|---------|--------|----------|----------|--------|

---

## 8. Reference

- [1] Z. Li, T. Li, J. Li, L. He, X. Jia and J. Yang, 2-Hydroxylation of 1,3-Diketones with Atmospheric Oxygen, *Synlett*, 2015, **26**, 2863-2865.
- [2] M. Zhang, S. Imm, S. Bähn, L. Neubert, H. Neumann and M. Beller, Efficient Copper(II)-Catalyzed Transamidation of Non-Activated Primary Carboxamides and Ureas with Amines, *Angew. Chem. Int. Ed.*, 2012, **51**, 3905-3909.
- [3] M. Huang, S. Zhong, M. Xu and Y. Liu, Synthesis of  $\alpha$ -Hydroxyl Amides via Direct Amidation of Lactic Acid at Solvent- and Catalyst-Free Conditions, *J. Chem. Res.*, 2015, **39**, 274-276.
- [4] Z. Li, Q. Wen, L. Zhou, X. Deng and Q. Zeng, Synthesis of  $\alpha$ -Hydroxycarboxylic Acid Anilides via Copper-Catalyzed C–N Coupling of  $\alpha$ -Hydroxyamides with Aryl Halides, *Synthesis*, 2015, **47**, 3751-3757.
- [5] M. C. Mamillapalli and G. Sekar, Metal free chemoselective reduction of  $\alpha$ -keto amides using TBAF as catalyst, *RSC Adv.*, 2014, **4**, 61077-61085.
- [6] Z. Yang and R. M. Koenigs, Photoinduced Palladium-Catalyzed Dicarbofunctionalization of Terminal Alkynes, *Chem. Eur. J.*, 2021, **27**, 3694-3699.

## 9. <sup>1</sup>H and <sup>13</sup>C-NMR Spectra Data

### 2-Cyclohexyl-3-oxo-N-phenylbutanamide [<sup>1</sup>H\_NMR\_600MHz\_(CDCl<sub>3</sub>:7.26 ppm)]

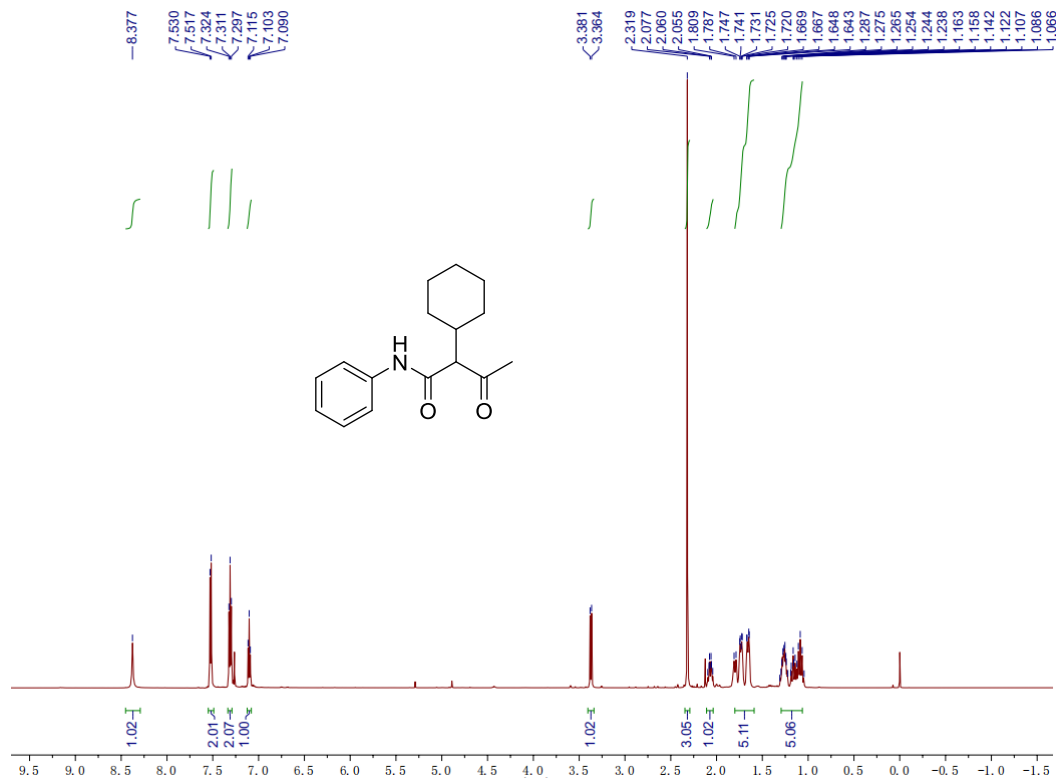

### [<sup>13</sup>C\_NMR\_150MHz\_(CDCl<sub>3</sub>:77.00 ppm)]

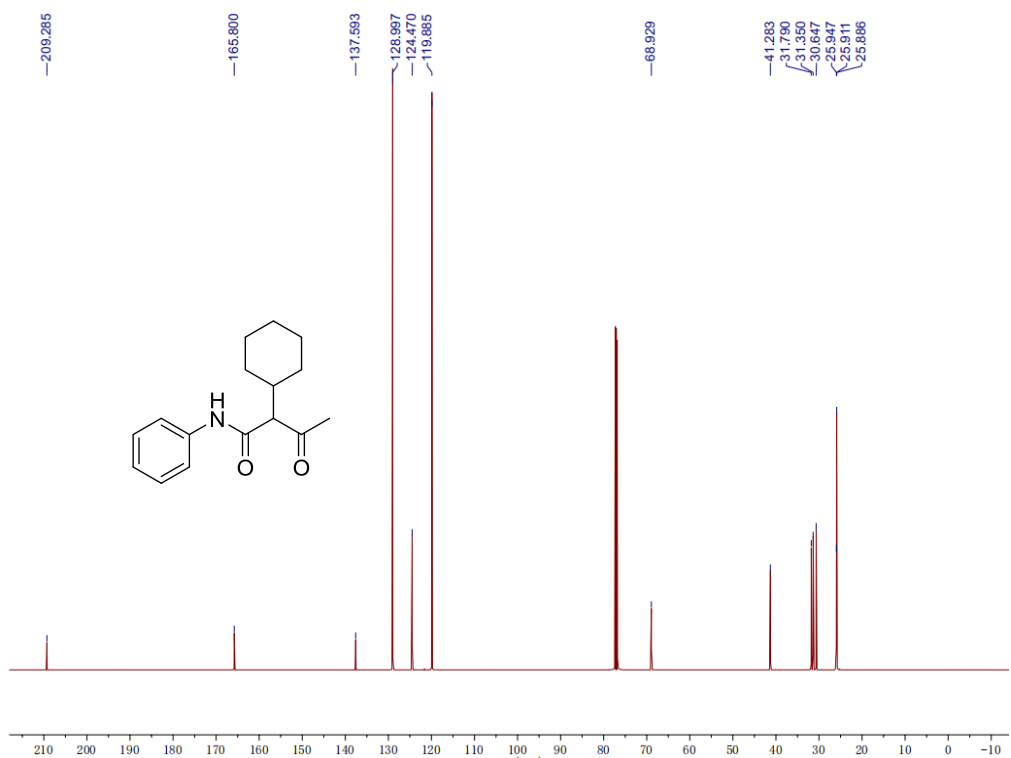

2-Cyclopentyl-3-oxo-N-phenylbutanamide [<sup>1</sup>H\_NMR\_600MHz\_(CDCl<sub>3</sub>:7.26 ppm)]

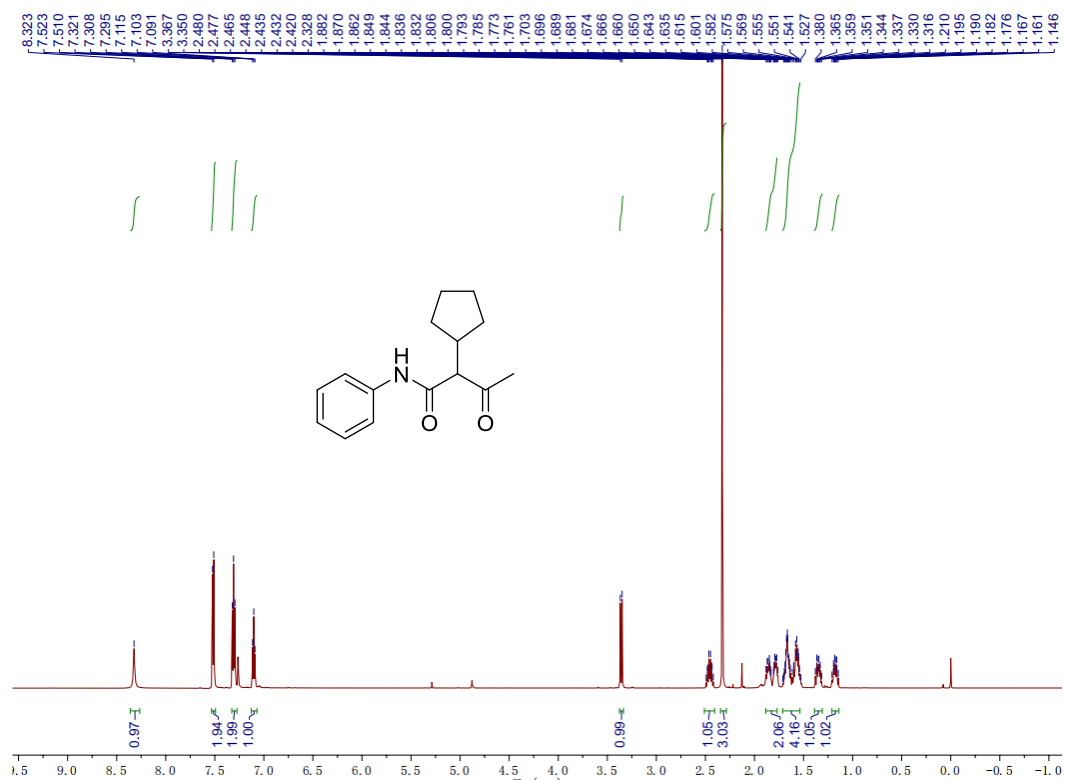

[<sup>13</sup>C\_NMR\_150MHz\_(CDCl<sub>3</sub>:77.00 ppm)]

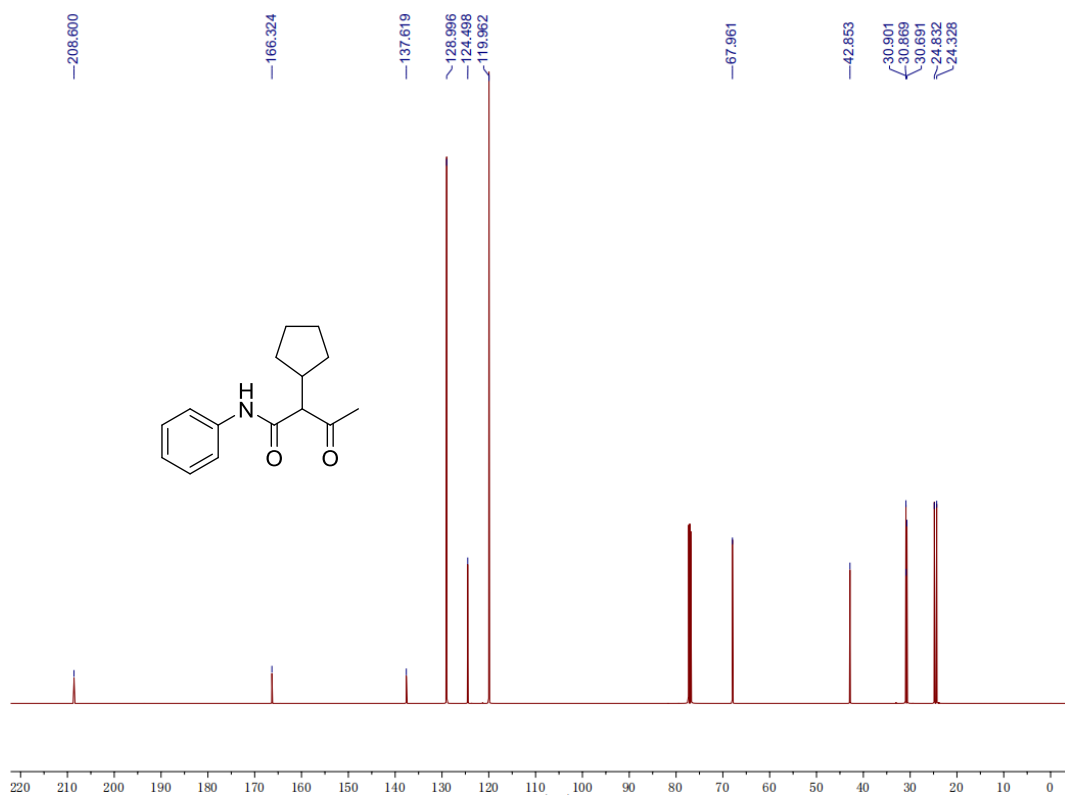

**2-Cycloheptyl-3-oxo-N-phenylbutanamide** [ $^1\text{H\_NMR\_600MHz\_}(\text{CDCl}_3:7.26 \text{ ppm})$ ]

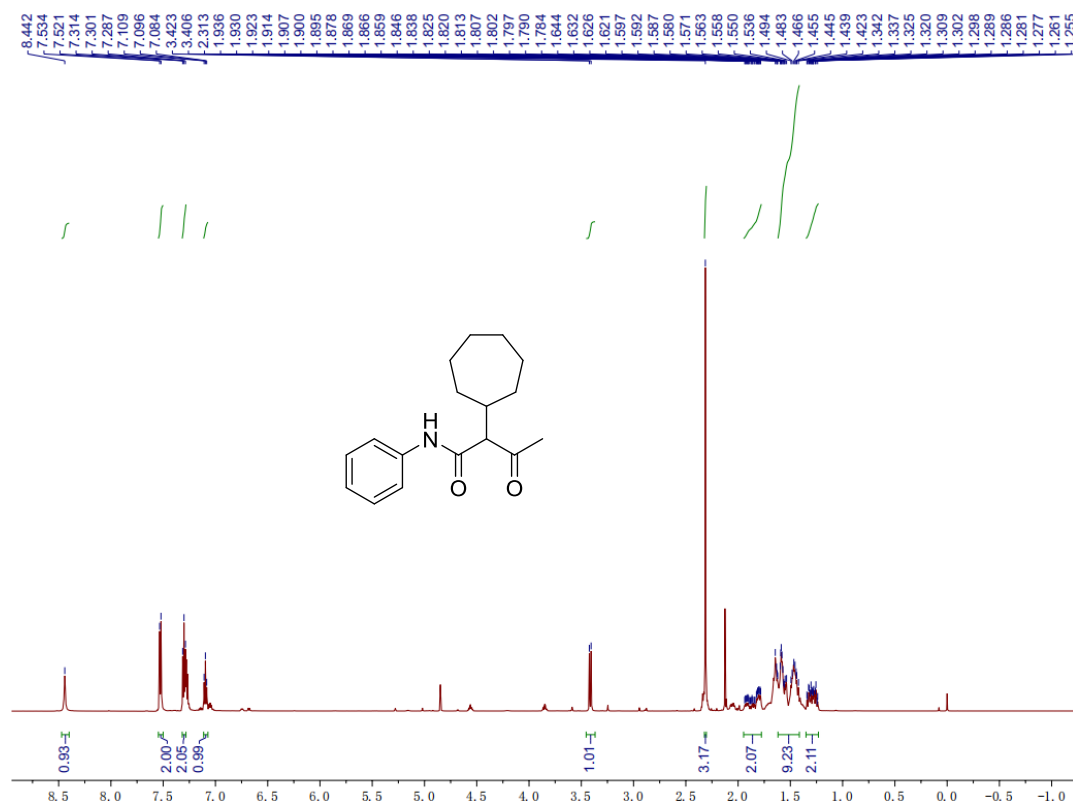

$^{13}\text{C\_NMR\_150MHz\_}(\text{CDCl}_3:77.00 \text{ ppm})$

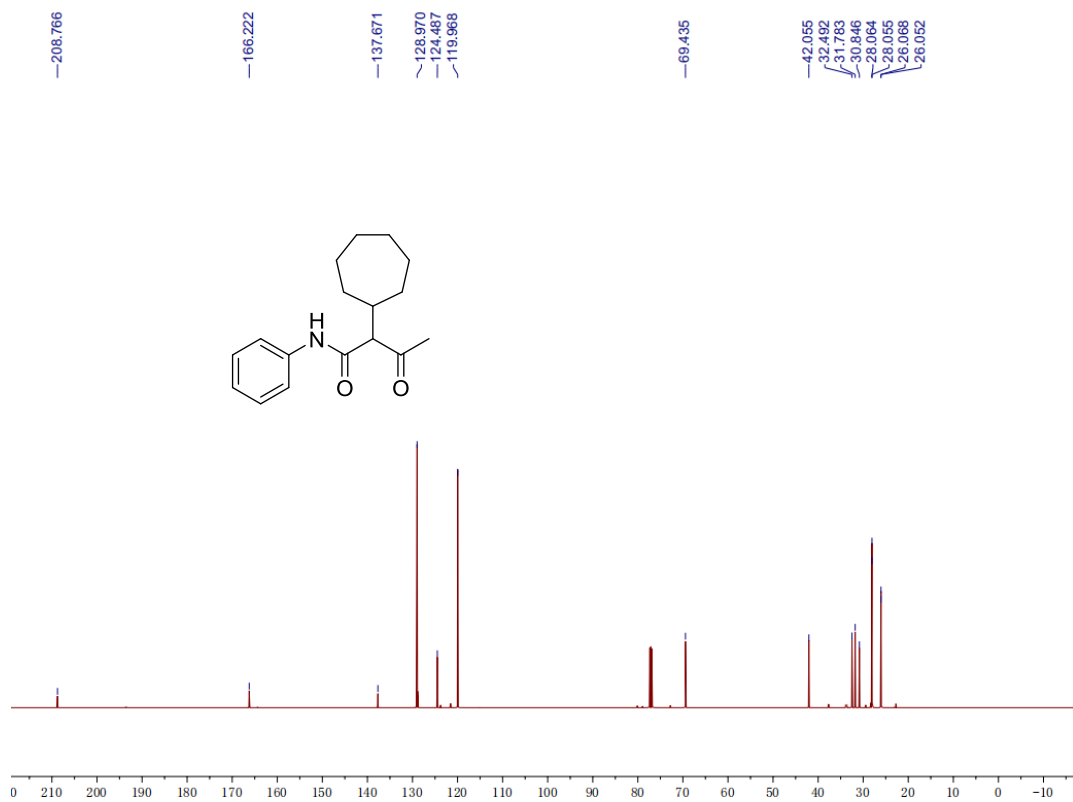

2-Acetyl-N-phenylpent-4-enamide [<sup>1</sup>H\_NMR\_600MHz\_(CDCl<sub>3</sub>:7.26 ppm)]

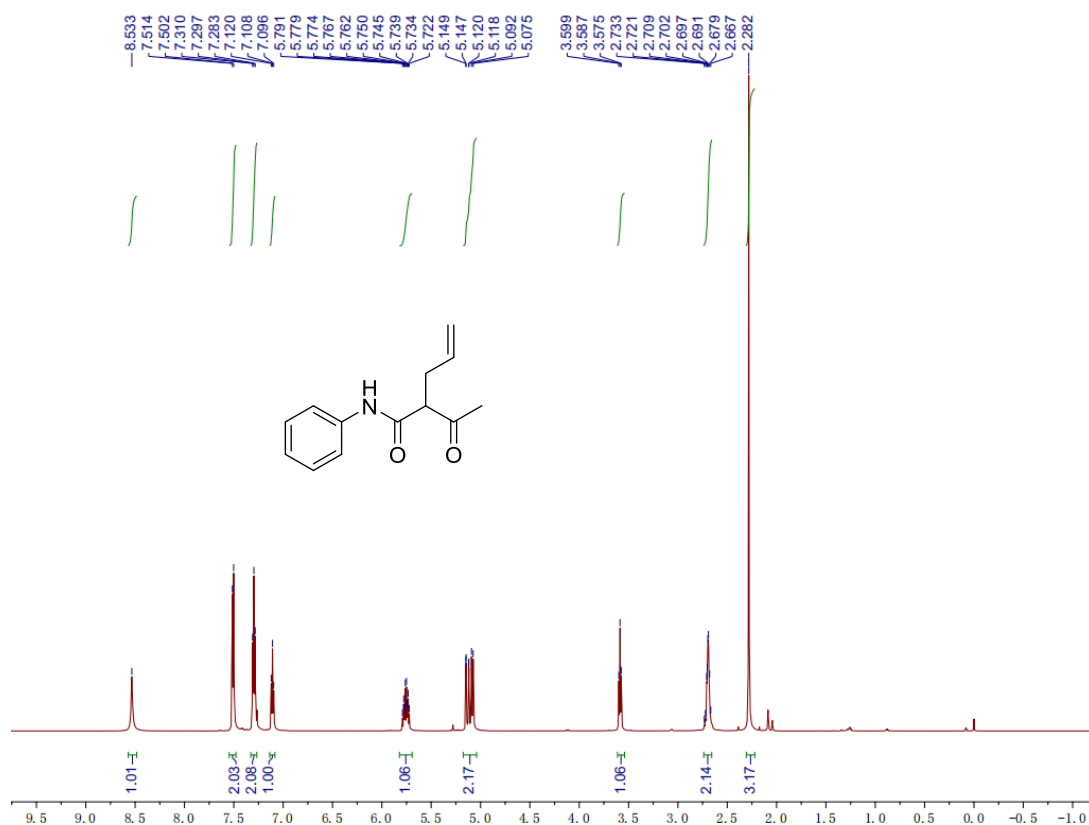

[<sup>13</sup>C\_NMR\_150MHz\_(CDCl<sub>3</sub>:77.00 ppm)]

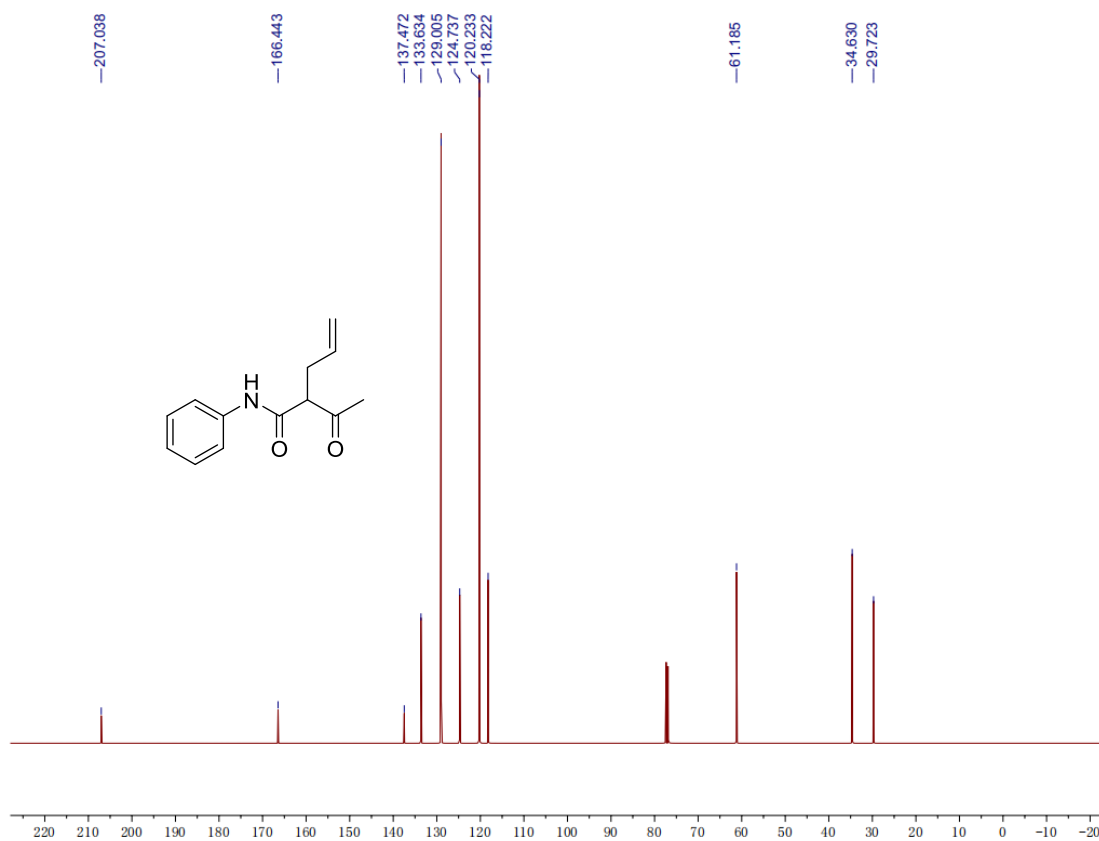

# *N*-(4-Chlorophenyl)-2-cyclohexyl-3-oxobutanamide

[<sup>1</sup>H\_NMR\_600MHz\_(CDCl<sub>3</sub>:7.26 ppm)]

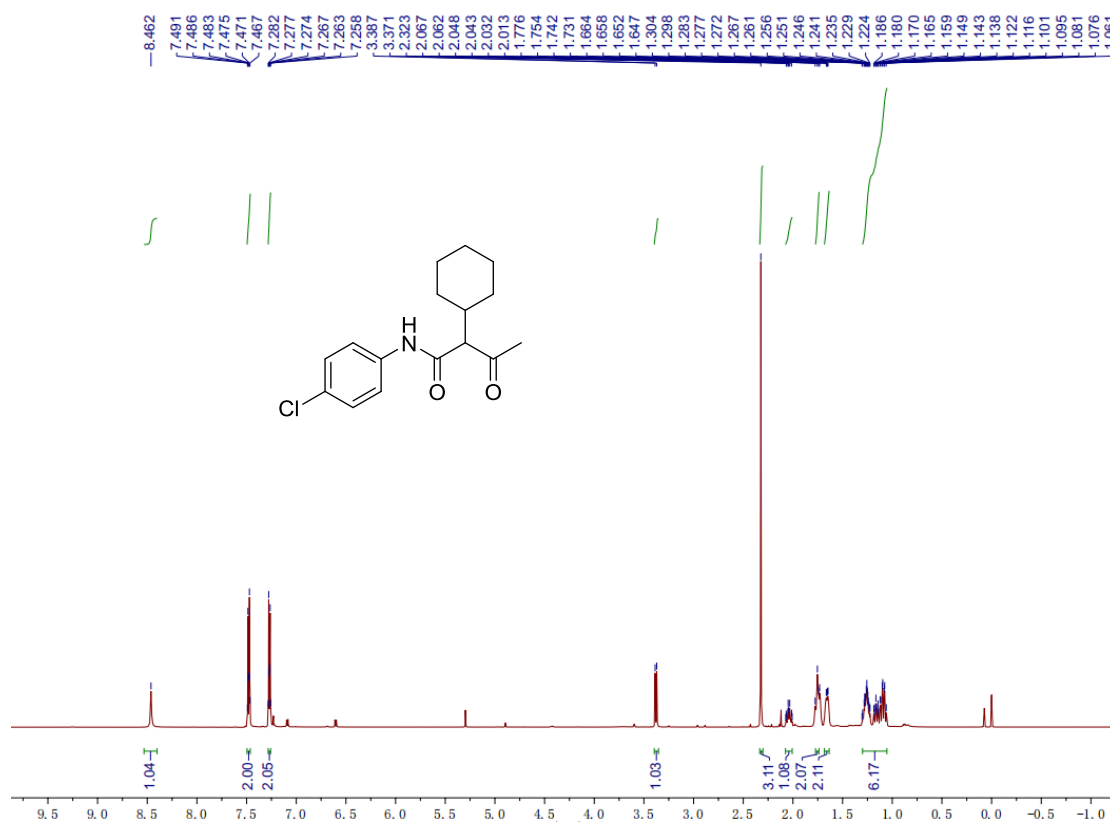

[<sup>13</sup>C\_NMR\_150MHz\_(CDCl<sub>3</sub>:77.00 ppm)]

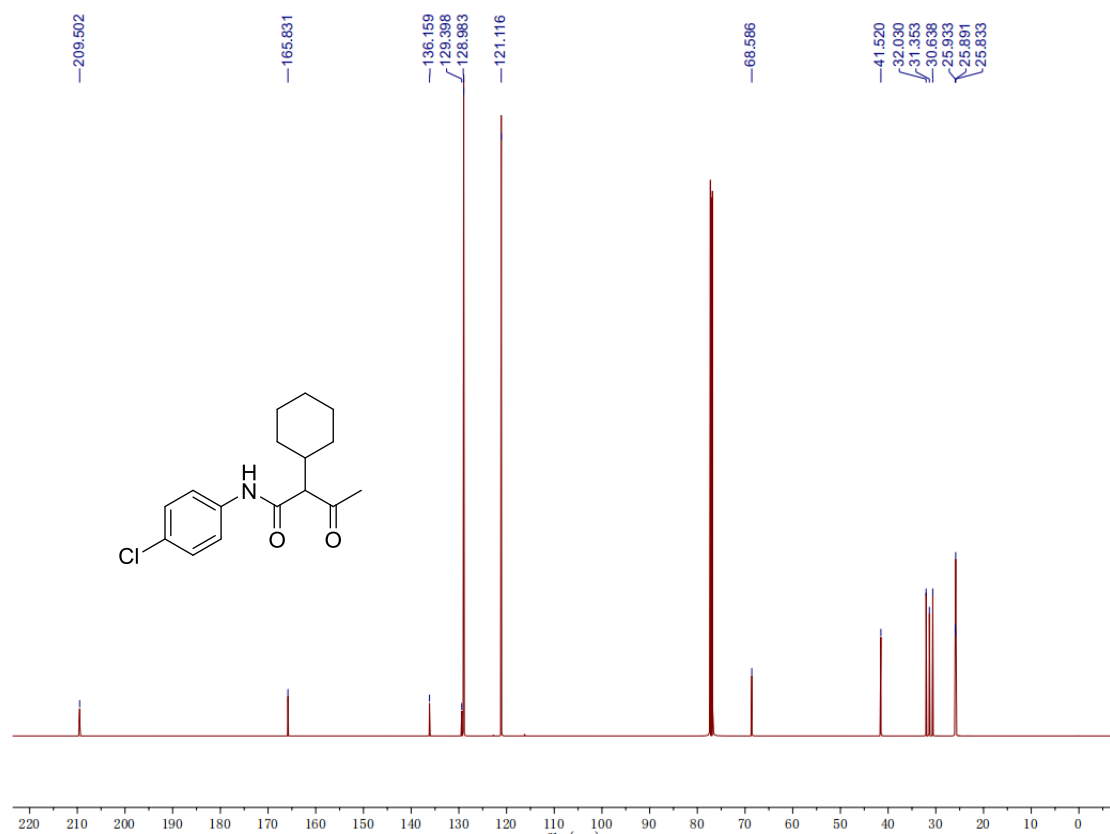

## 2-Cyclohexyl-N-(4-fluorophenyl)-3-oxobutanamide

[<sup>1</sup>H\_NMR\_600MHz\_(CDCl<sub>3</sub>:7.26 ppm)]

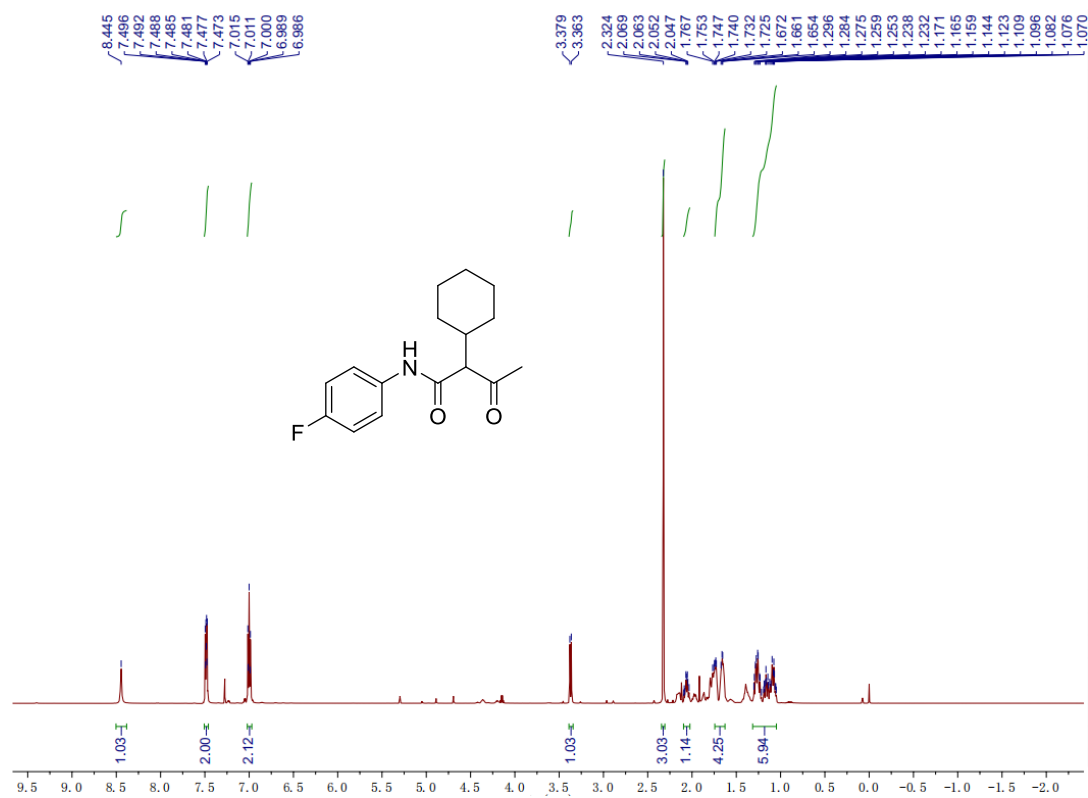

[<sup>13</sup>C\_NMR\_150MHz\_(CDCl<sub>3</sub>:77.00 ppm)]

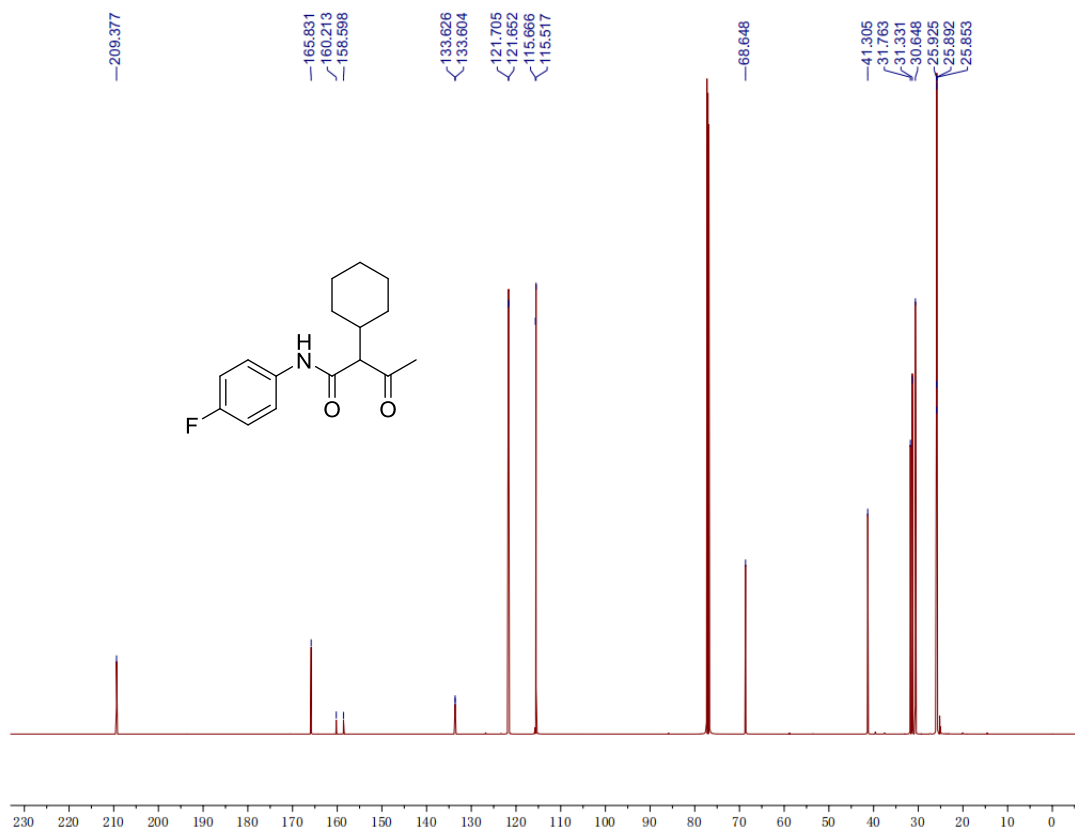



**2-Cyclohexyl-3-oxo-N-(p-tolyl)butanamide** [ $^1\text{H\_NMR\_400MHz\_}(\text{CDCl}_3:7.26 \text{ ppm})$ ]

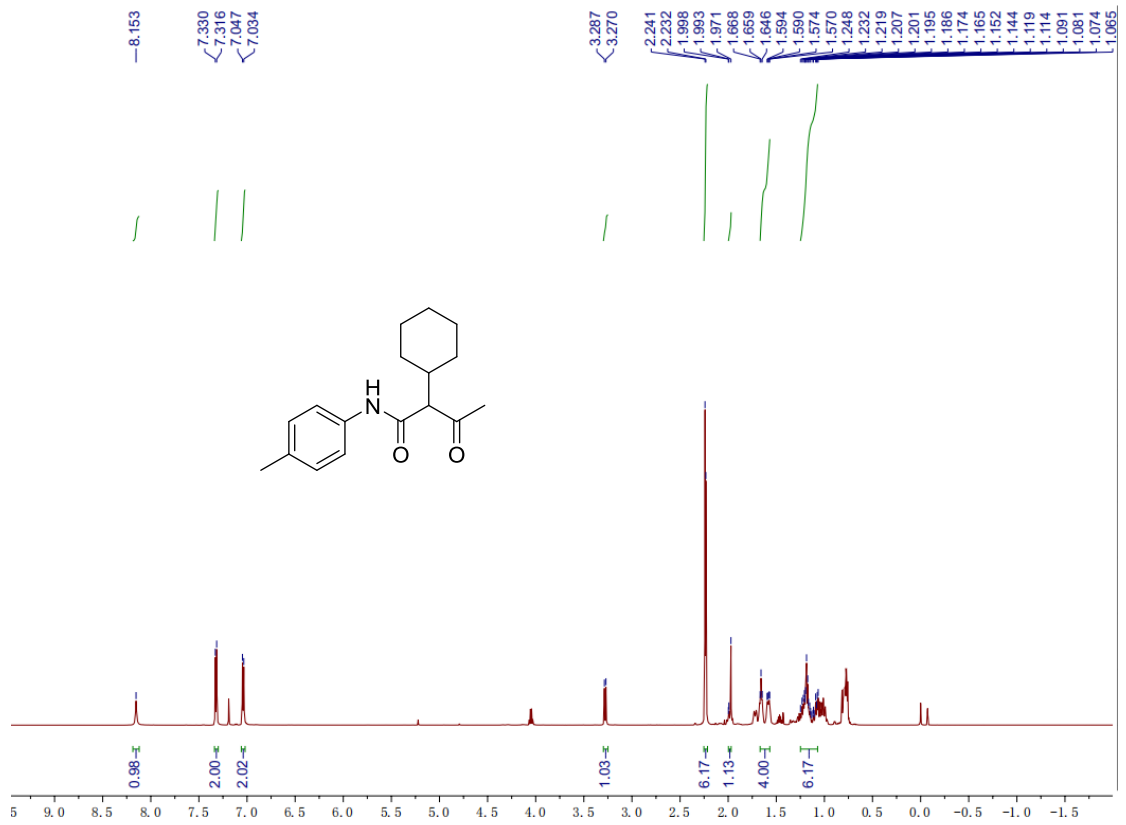

**[ $^{13}\text{C\_NMR\_150MHz\_}(\text{CDCl}_3:77.00 \text{ ppm})$ ]**

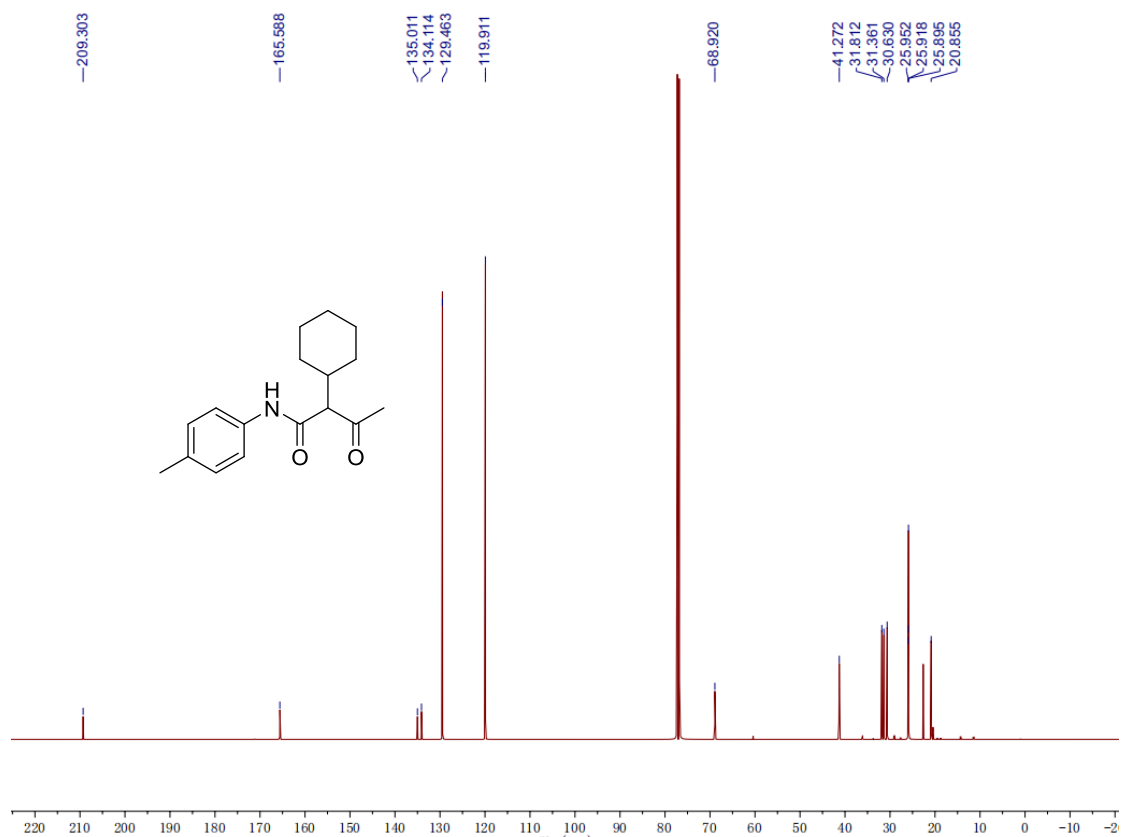

# *N*-(4-(*tert*-Butyl)phenyl)-2-cyclohexyl-3-oxobutanamide

[<sup>1</sup>H\_NMR\_400MHz\_(CDCl<sub>3</sub>:7.26 ppm)]

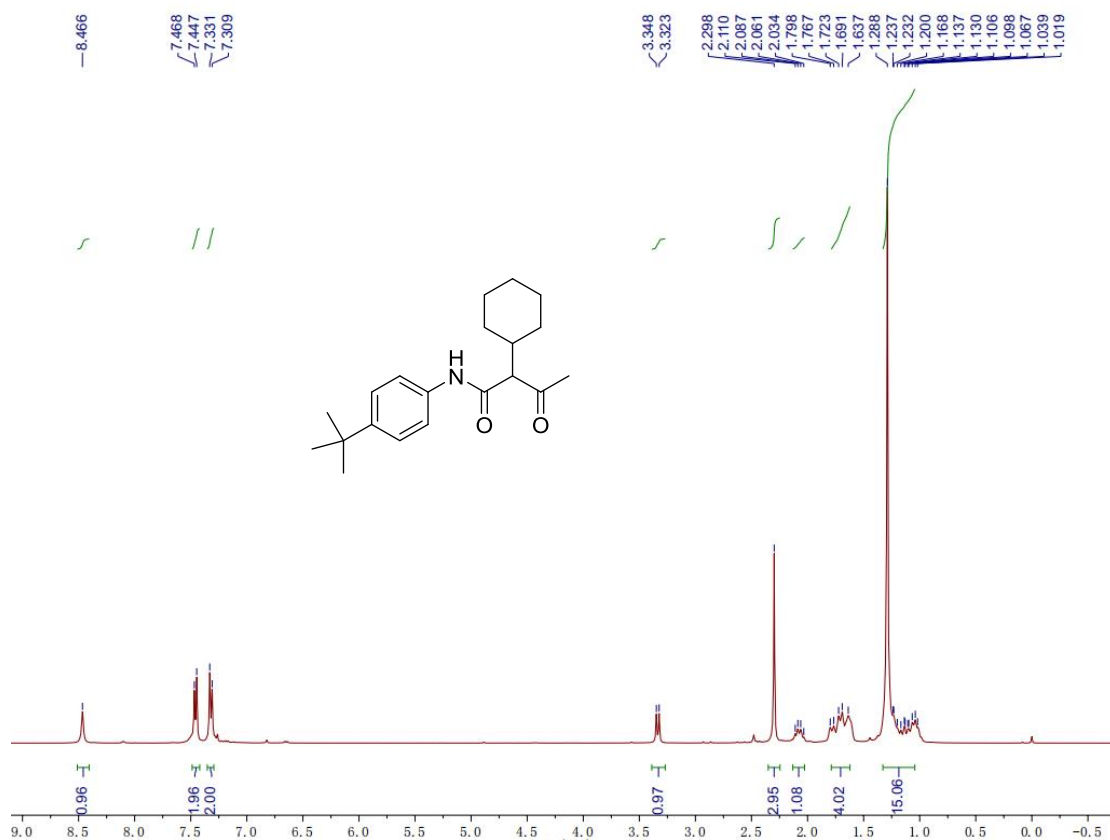

[<sup>13</sup>C\_NMR\_100MHz\_(CDCl<sub>3</sub>:77.00 ppm)]

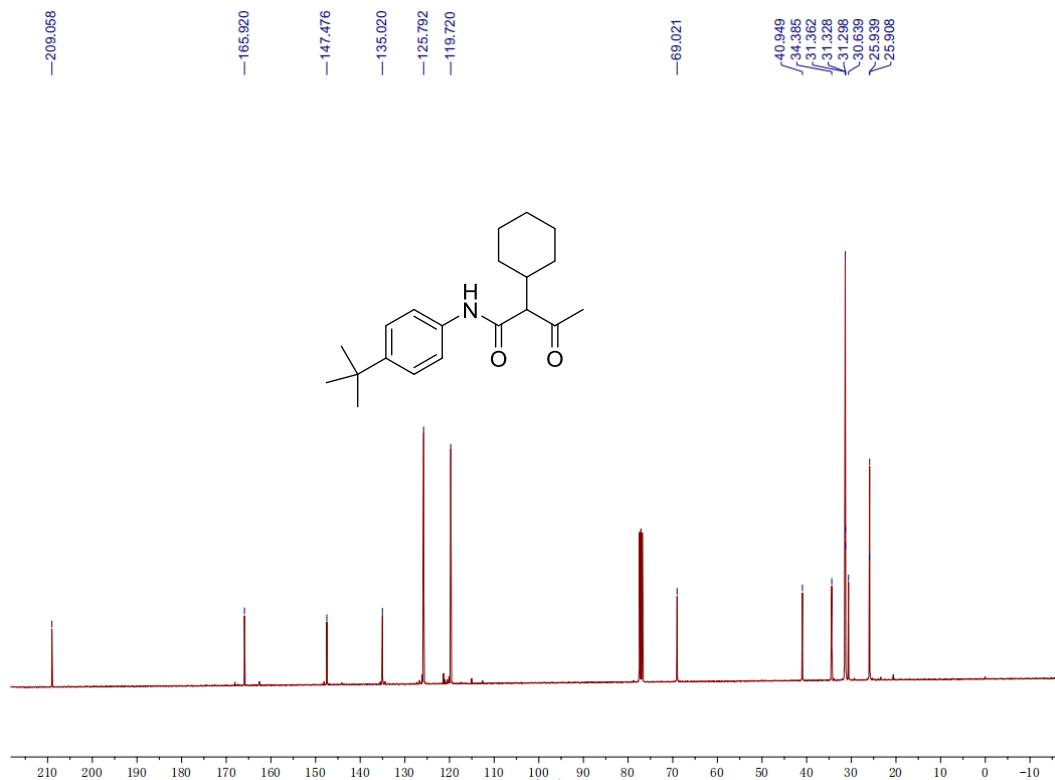

## 2-Cyclohexyl-N-(4-methoxyphenyl)-3-oxobutanamide

[<sup>1</sup>H\_NMR\_600MHz\_(CDCl<sub>3</sub>:7.26 ppm)]

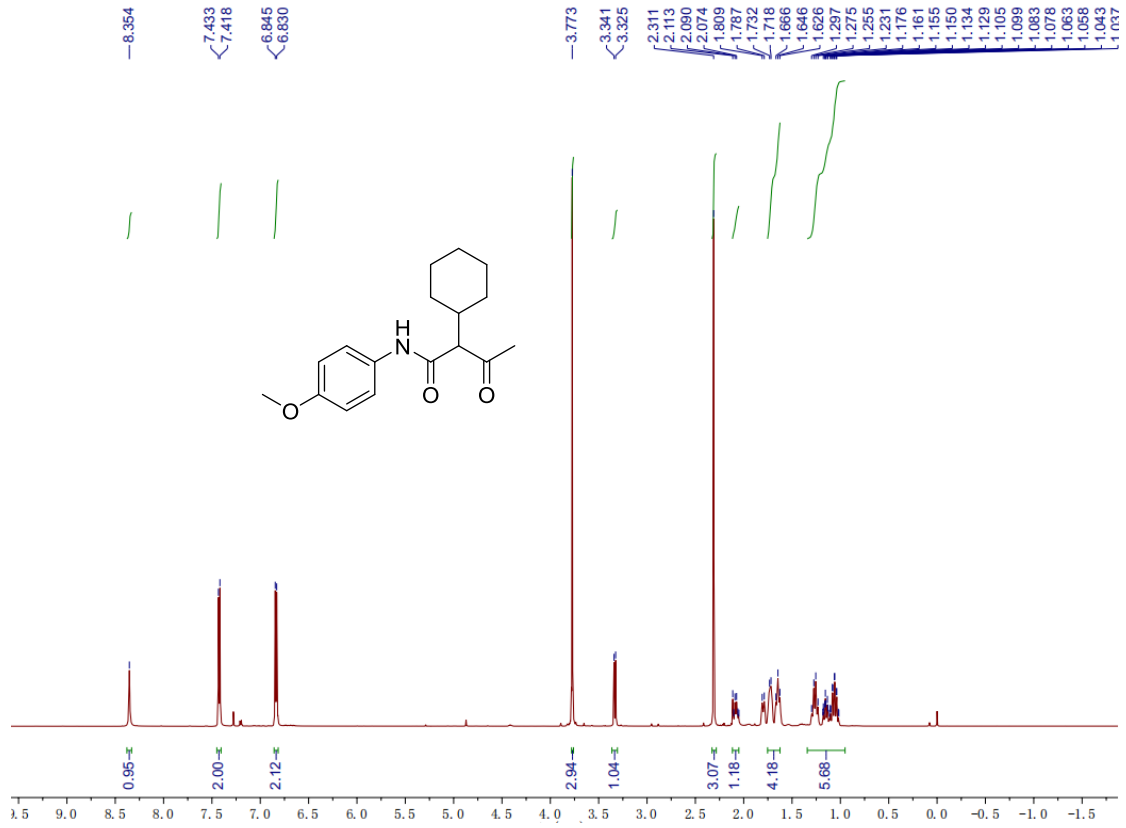

[<sup>13</sup>C\_NMR\_150MHz\_(CDCl<sub>3</sub>:77.00 ppm)]

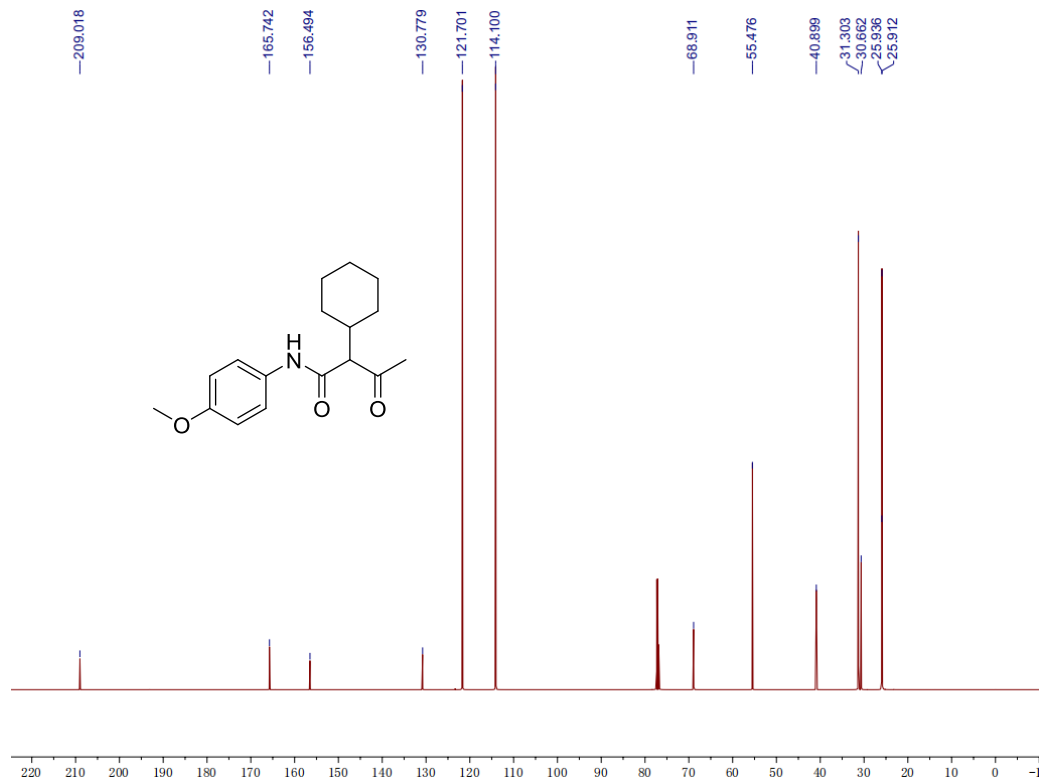

## 2-Cyclohexyl-N-(4-ethoxyphenyl)-3-oxobutanamide

[<sup>1</sup>H\_NMR\_600MHz\_(CDCl<sub>3</sub>:7.26 ppm)]

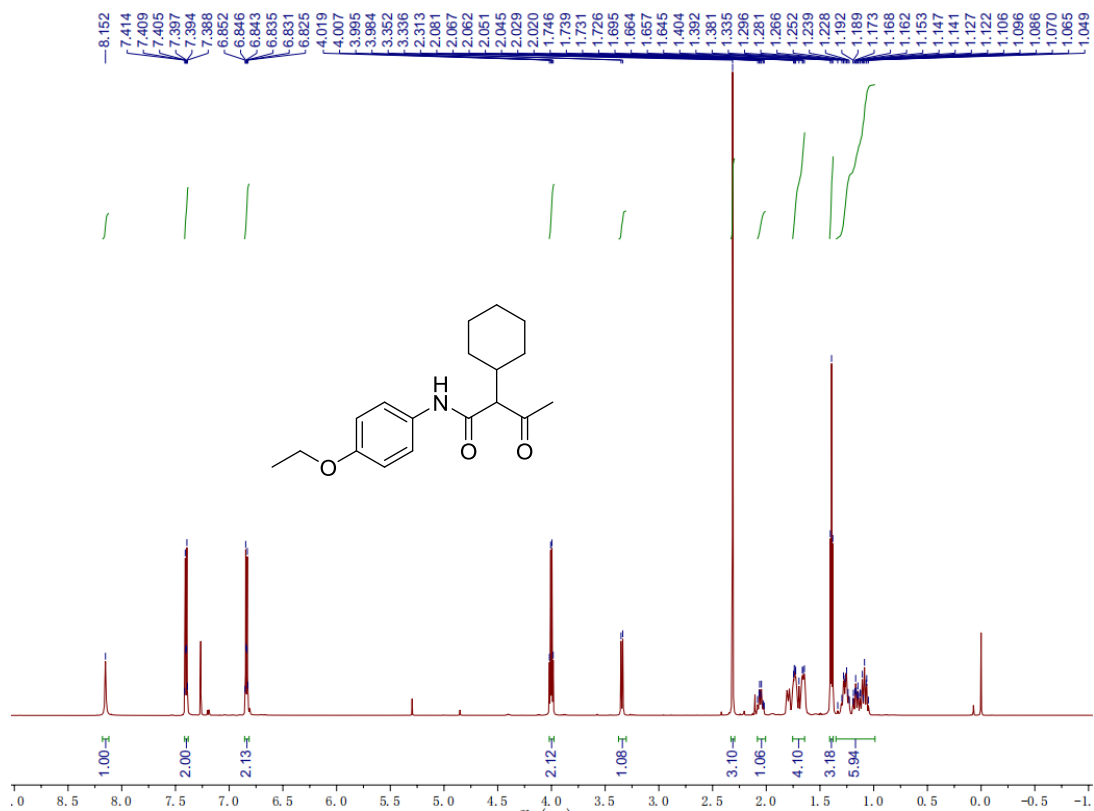

[<sup>13</sup>C\_NMR\_150MHz\_(CDCl<sub>3</sub>:77.00 ppm)]

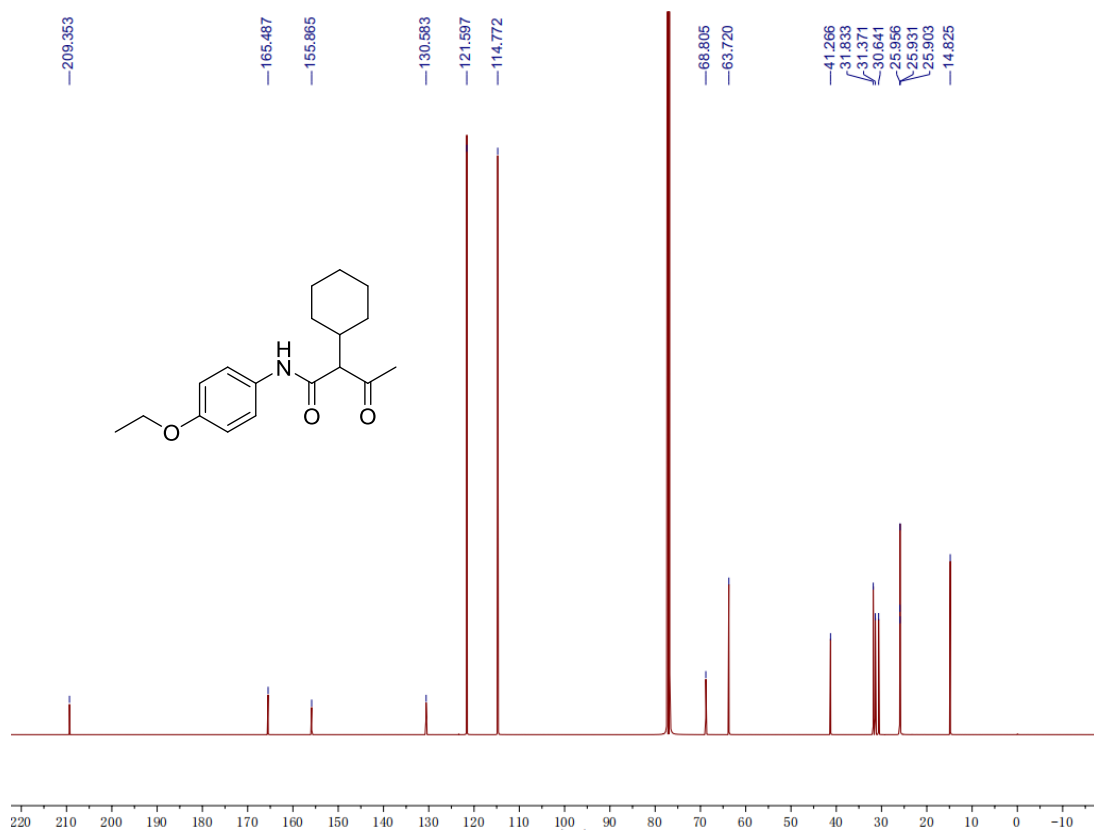

# *N*-(3-Chlorophenyl)-2-cyclohexyl-3-oxobutanamide

[<sup>1</sup>H\_NMR\_600MHz\_(CDCl<sub>3</sub>:7.26 ppm)]

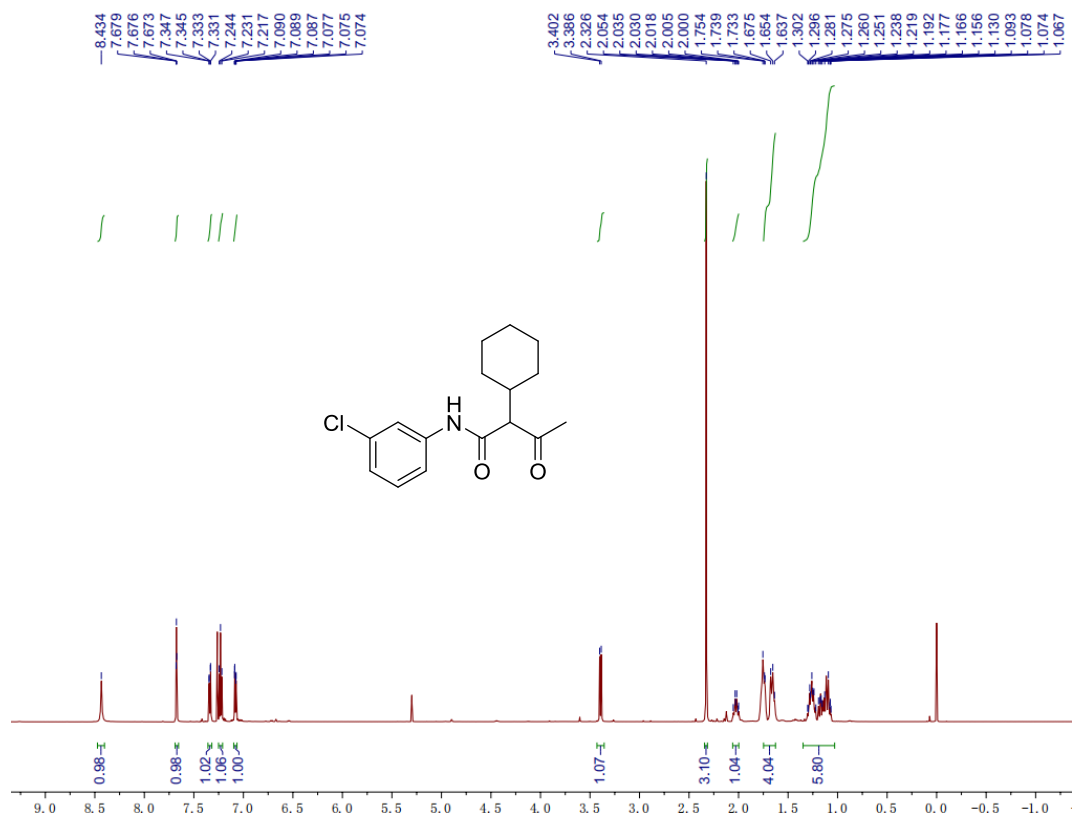

[<sup>13</sup>C\_NMR\_150MHz\_(CDCl<sub>3</sub>:77.00 ppm)]

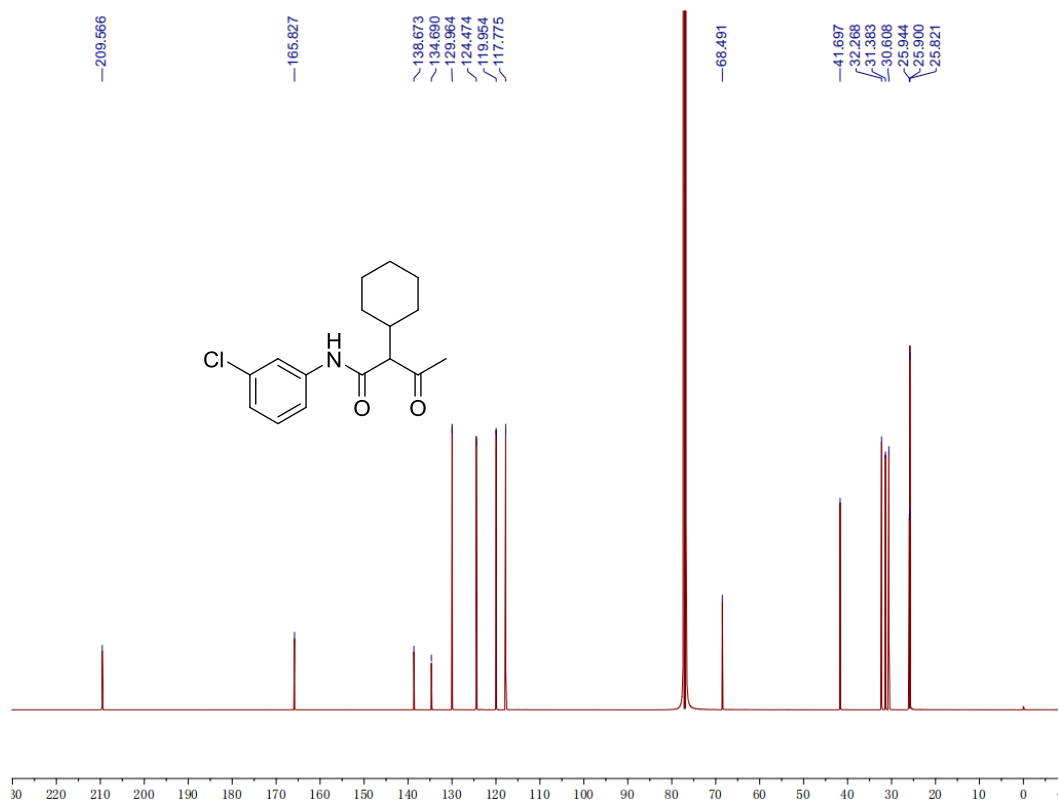

**2-Cyclohexyl-3-oxo-N-(m-tolyl)butanamide** [ $^1\text{H\_NMR\_600MHz\_}(\text{CDCl}_3:7.26 \text{ ppm})$ ]

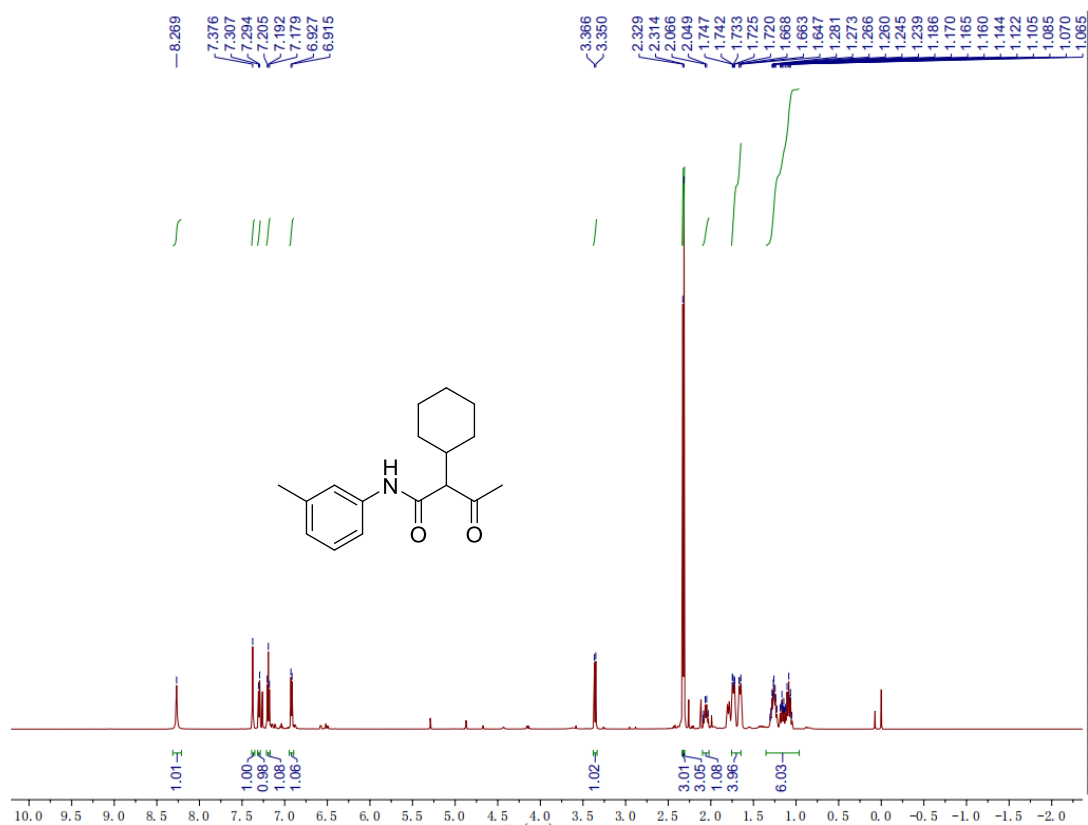

$^{13}\text{C\_NMR\_150MHz\_}(\text{CDCl}_3:77.00 \text{ ppm})$

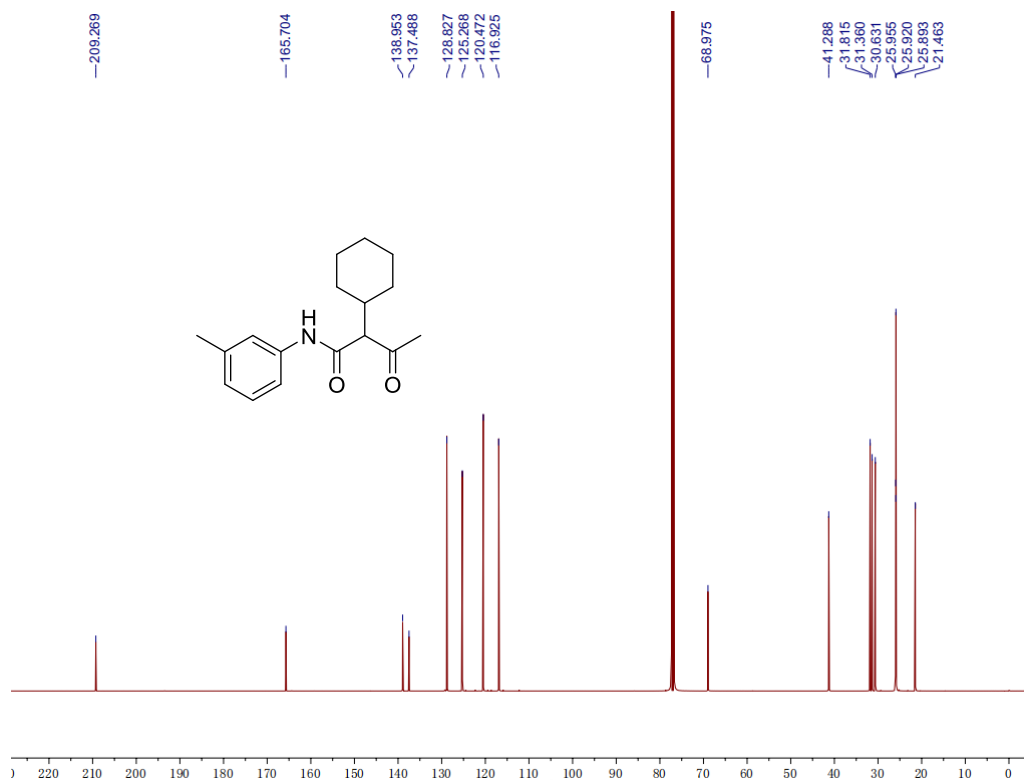

# *N*-(2-Chlorophenyl)-2-cyclohexyl-3-oxobutanamide

[<sup>1</sup>H\_NMR\_600MHz\_(CDCl<sub>3</sub>:7.26 ppm)]

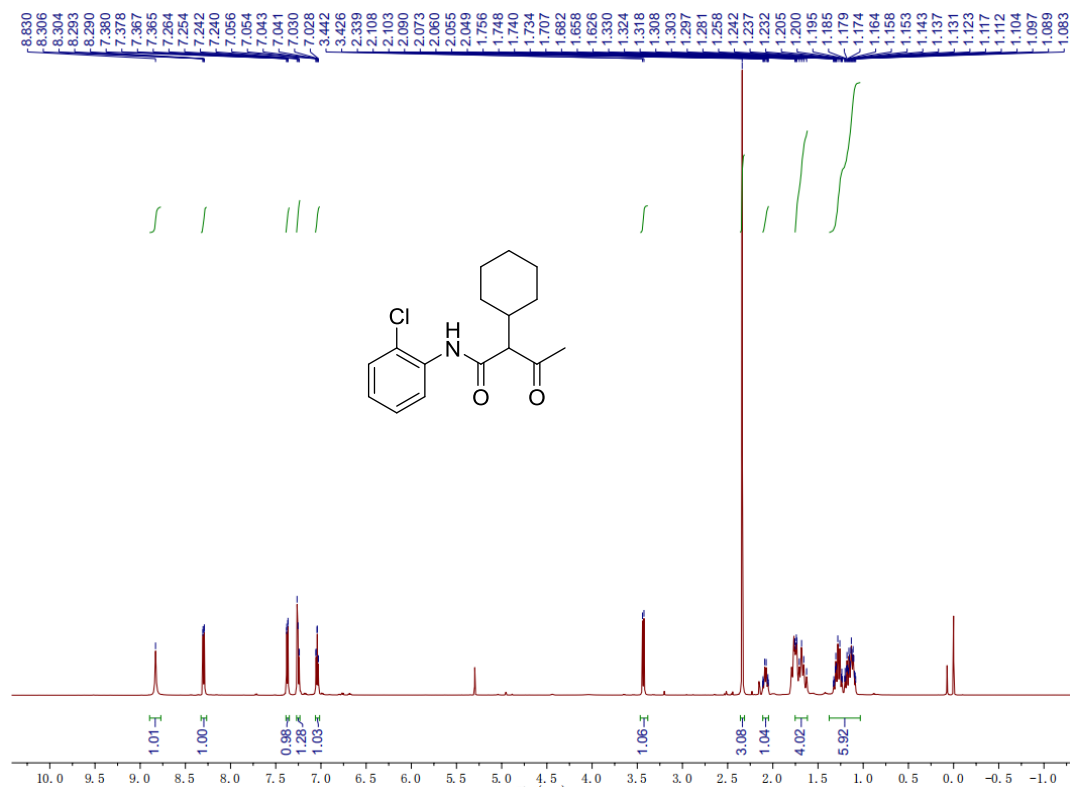

[<sup>13</sup>C\_NMR\_150MHz\_(CDCl<sub>3</sub>:77.00 ppm)]

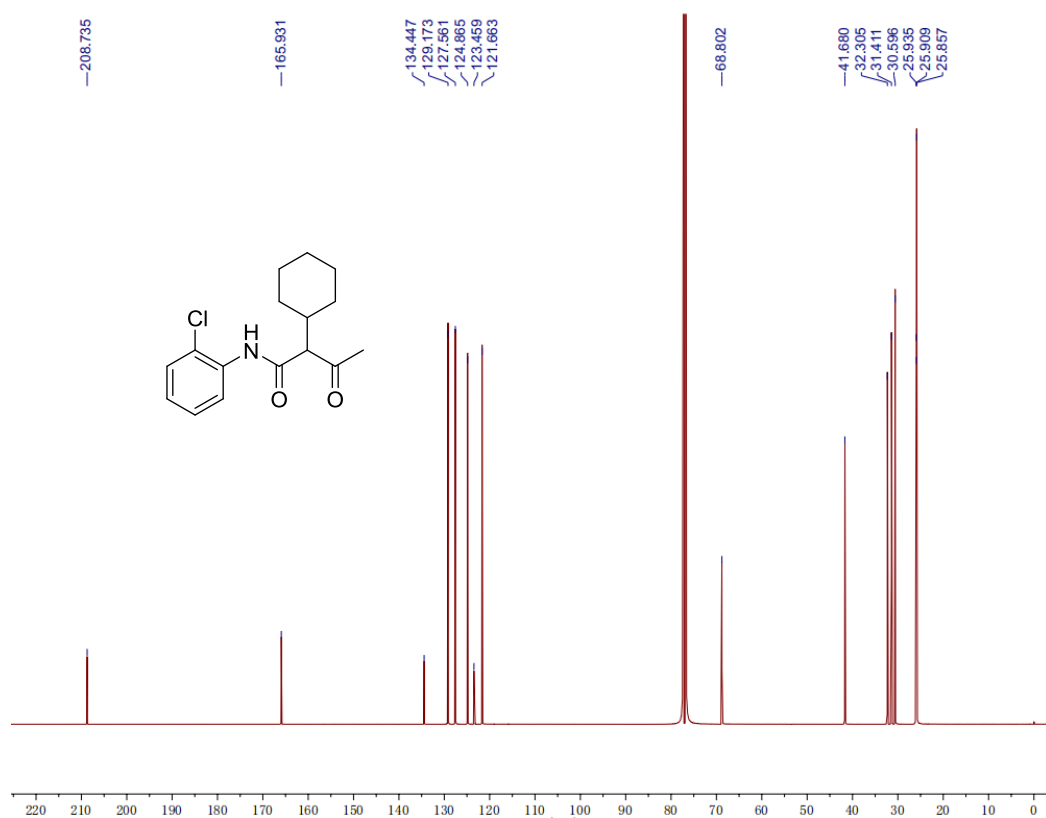

## 2-Cyclohexyl-N-(2-fluorophenyl)-3-oxobutanamide

[<sup>1</sup>H\_NMR\_600MHz\_(CDCl<sub>3</sub>:7.26 ppm)]

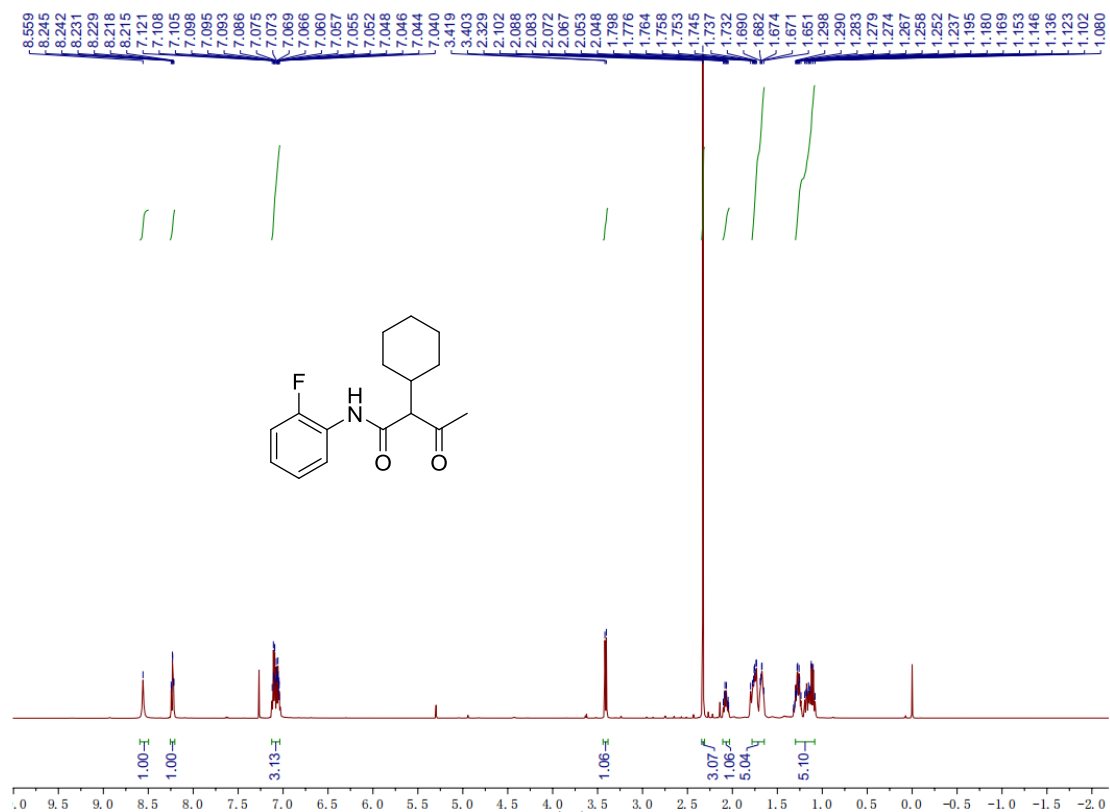

[<sup>13</sup>C\_NMR\_150MHz\_(CDCl<sub>3</sub>:77.00 ppm)]

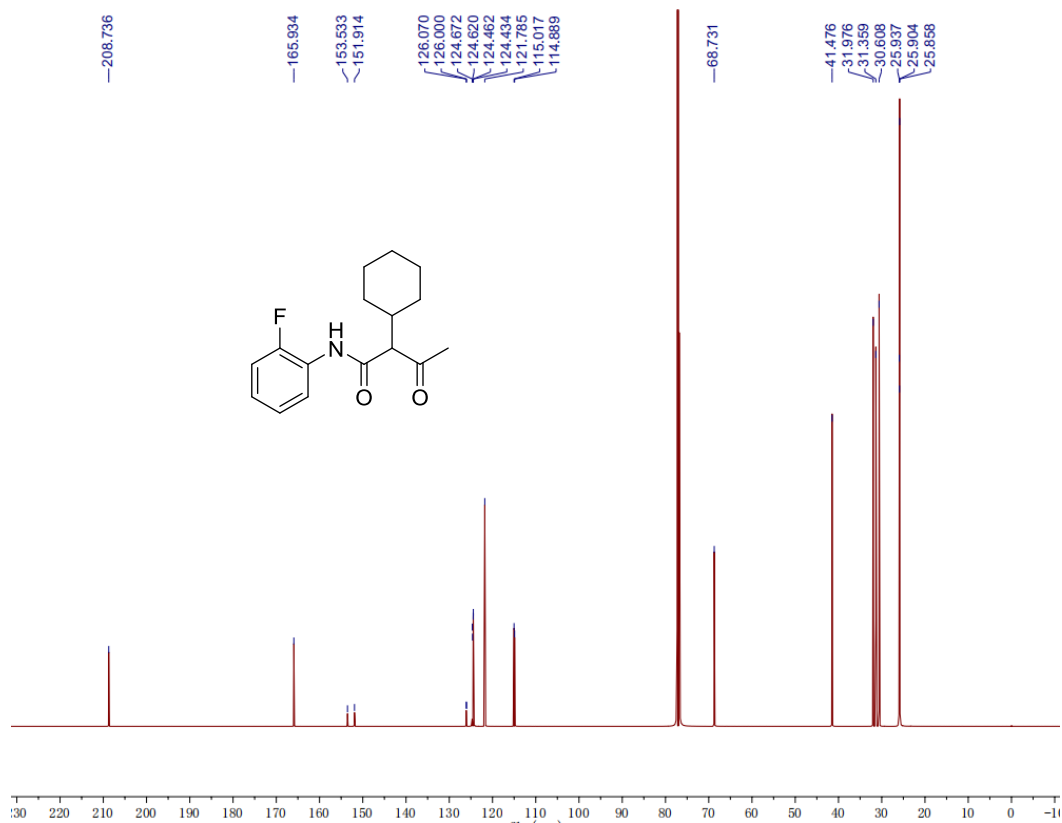



2-Cyclohexyl-3-oxo-N-(o-tolyl)butanamide [<sup>1</sup>H\_NMR\_400MHz\_(CDCl<sub>3</sub>:7.26 ppm)]

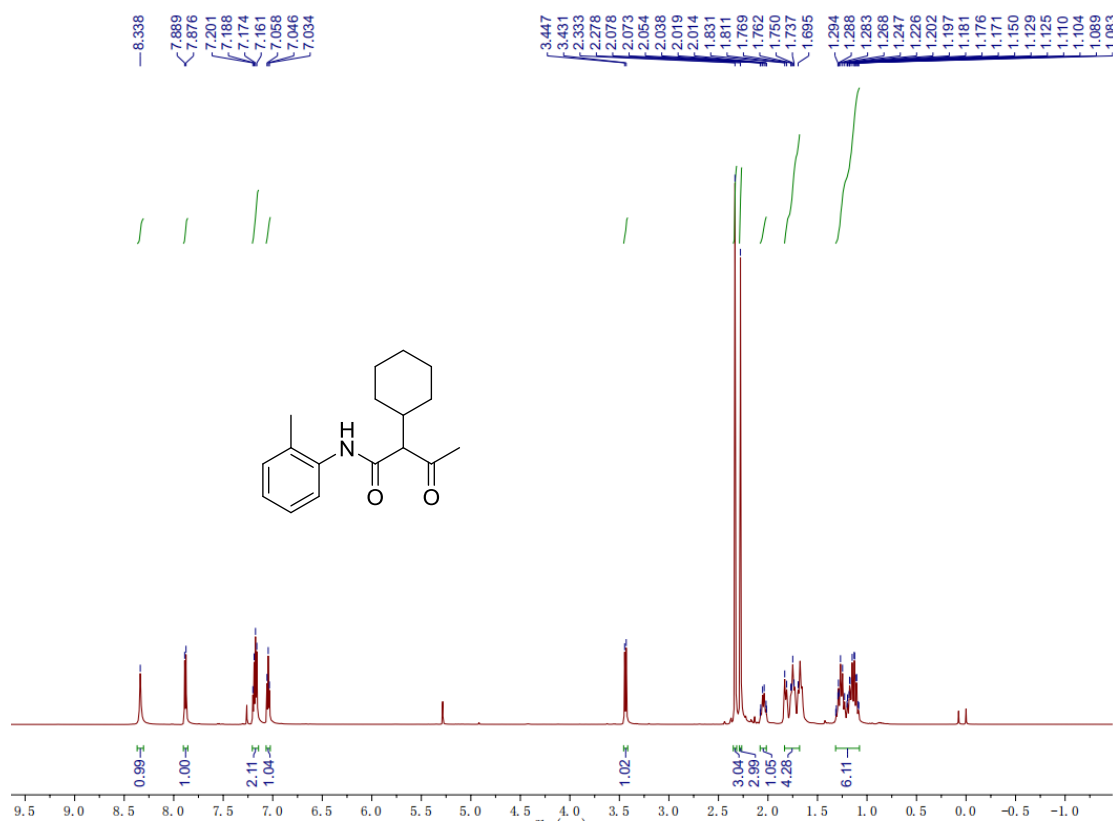

[<sup>13</sup>C\_NMR\_150MHz\_(CDCl<sub>3</sub>:77.00 ppm)]

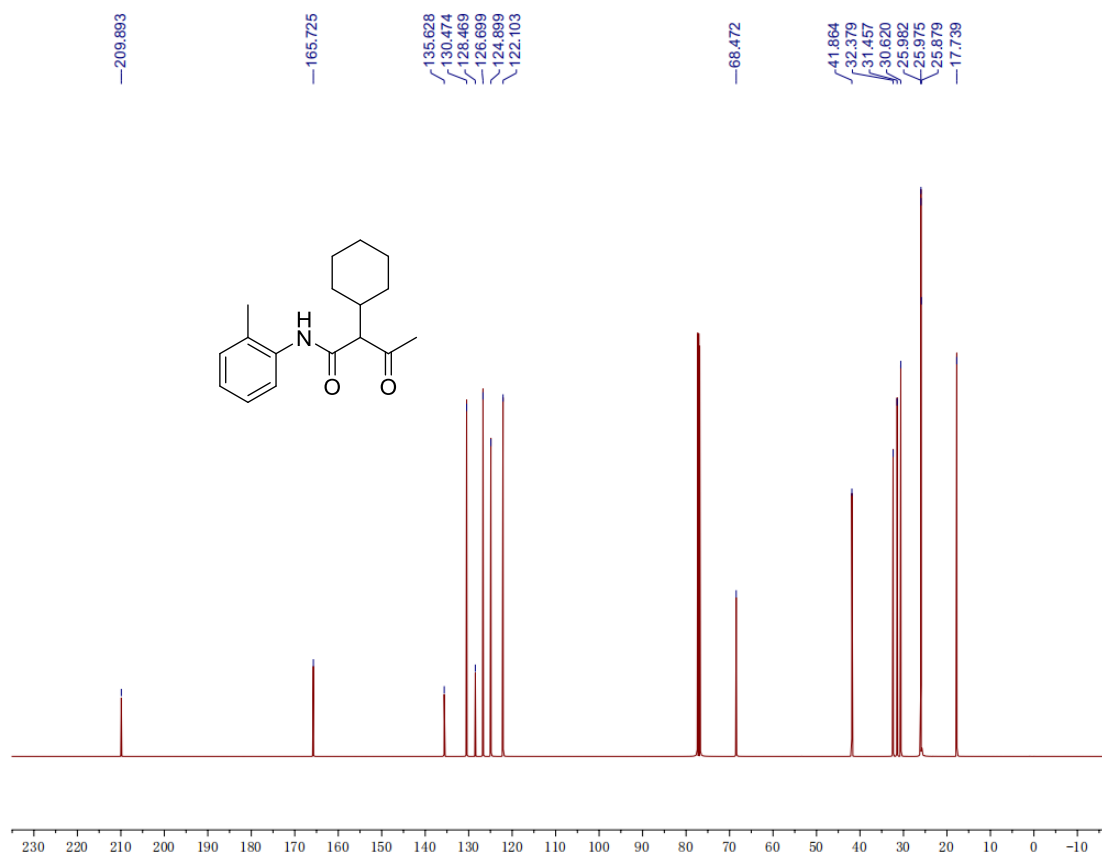

## 2-Cyclohexyl-N-(2-methoxyphenyl)-3-oxobutanamide

[<sup>1</sup>H\_NMR\_600MHz\_(CDCl<sub>3</sub>:7.26 ppm)]

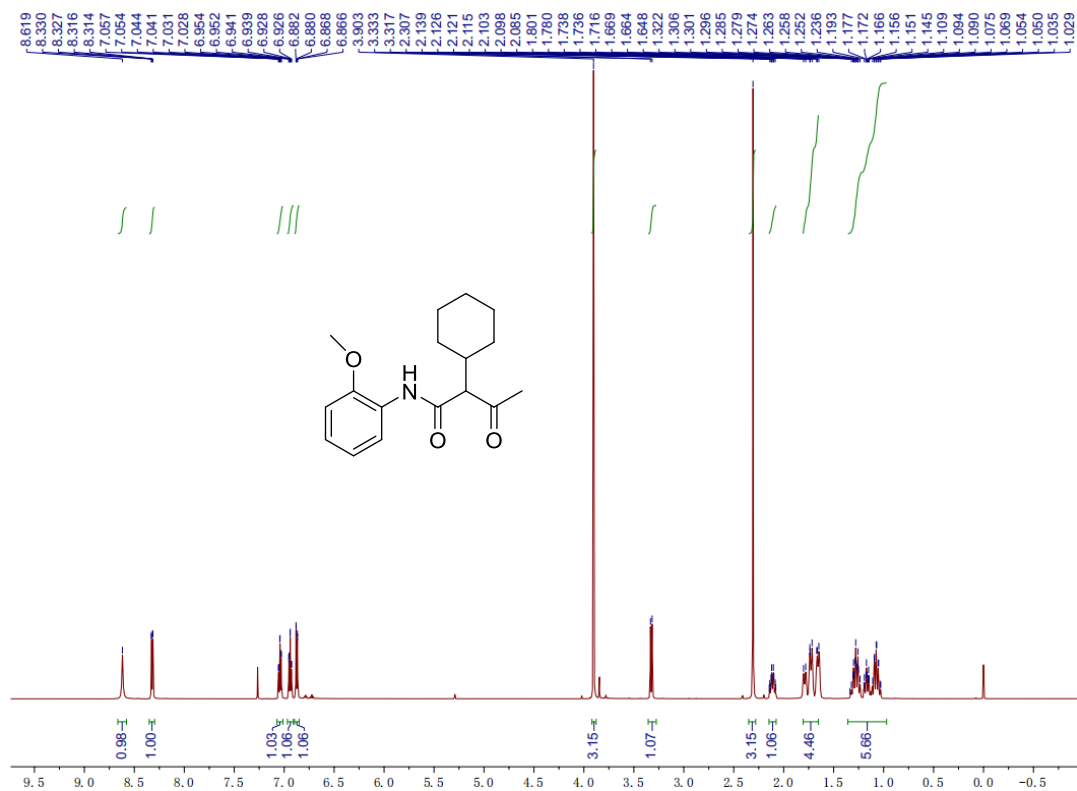

[<sup>13</sup>C\_NMR\_150MHz\_(CDCl<sub>3</sub>:77.00 ppm)]

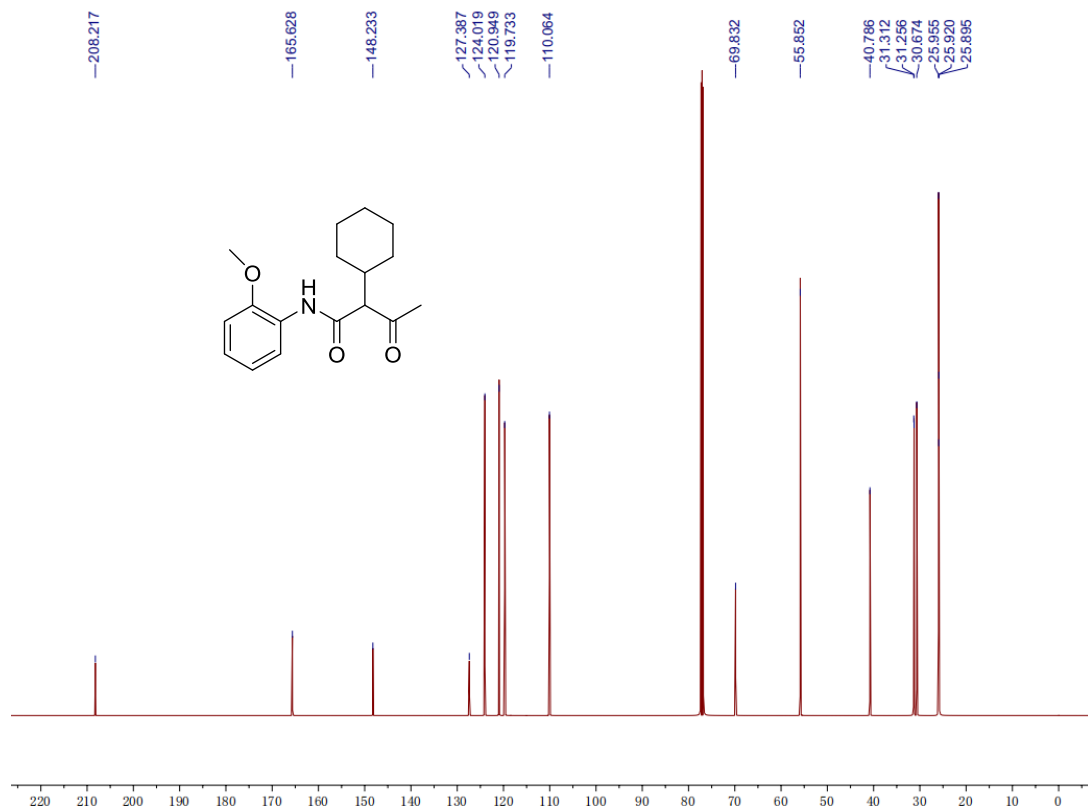

***N*-(4-Chloro-2-methylphenyl)-2-cyclohexyl-3-oxobutanamide**

[<sup>1</sup>H\_NMR\_600MHz\_(CDCl<sub>3</sub>:7.26 ppm)]

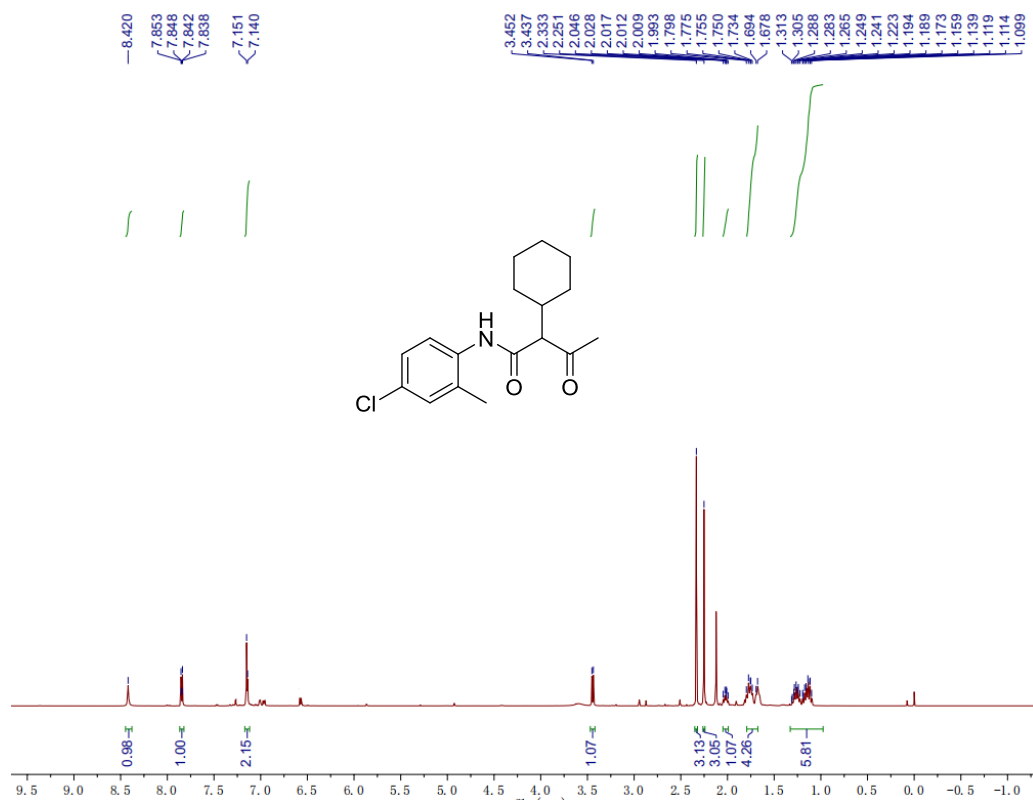

[<sup>13</sup>C\_NMR\_150MHz\_(CDCl<sub>3</sub>:77.00 ppm)]

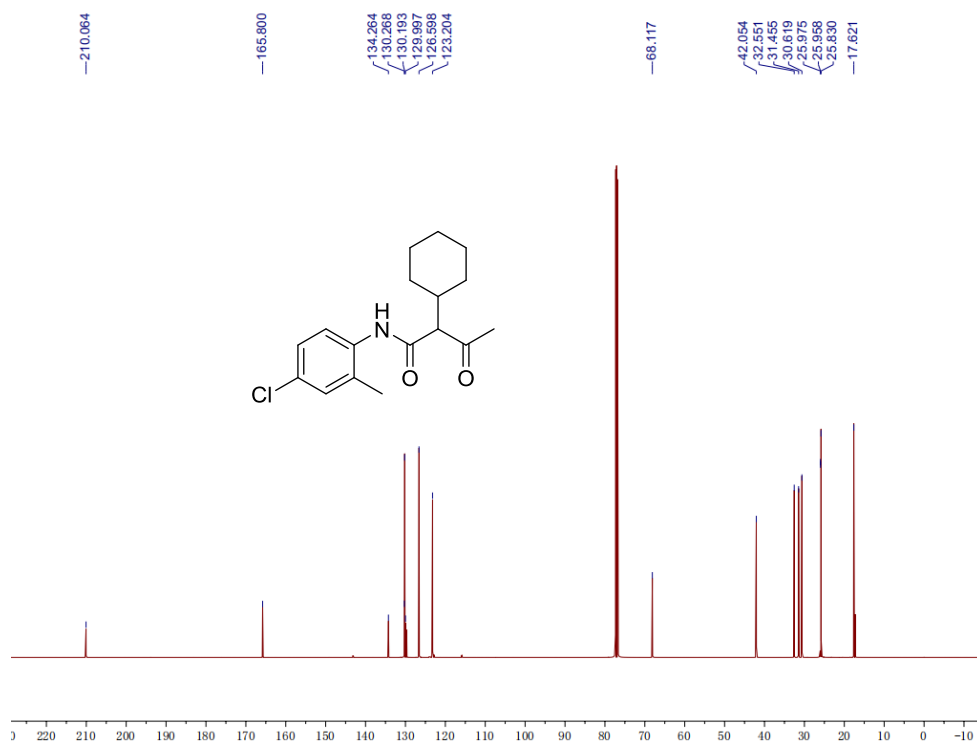

**2-Cyclohexyl-3-oxo-N-(pyridin-2-yl)butanamide** [ $^1\text{H-NMR}_{600\text{MHz}}(\text{CDCl}_3:7.26 \text{ ppm})$ ]

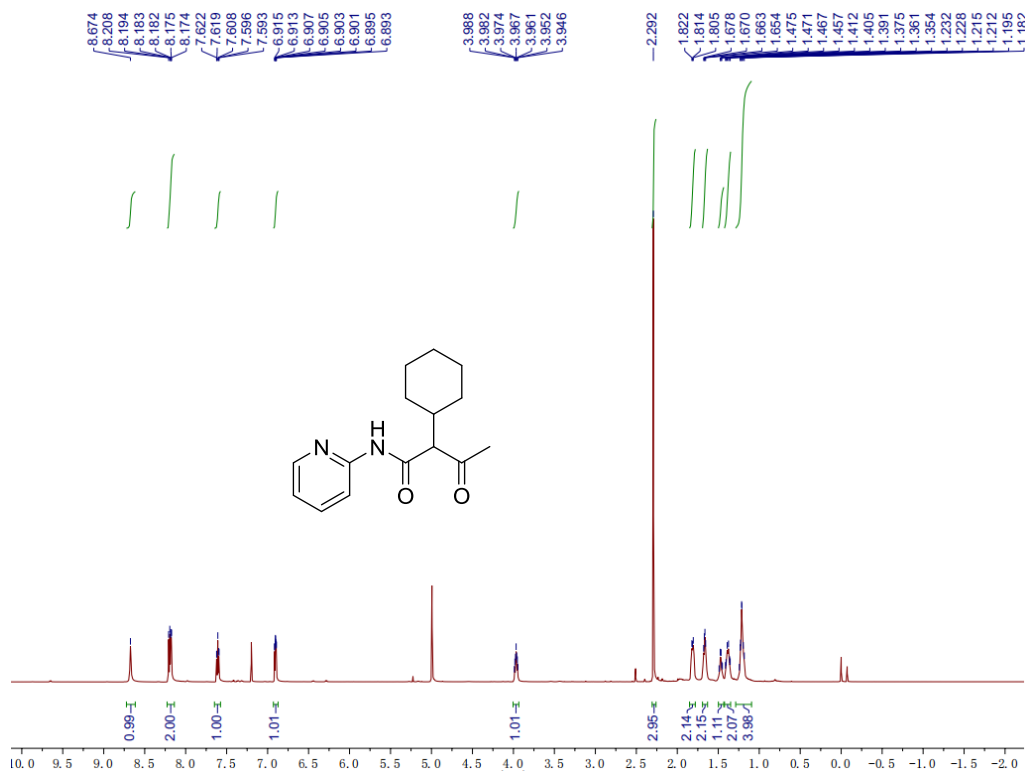

**$^{13}\text{C-NMR}_{150\text{MHz}}(\text{CDCl}_3:77.00 \text{ ppm})$**

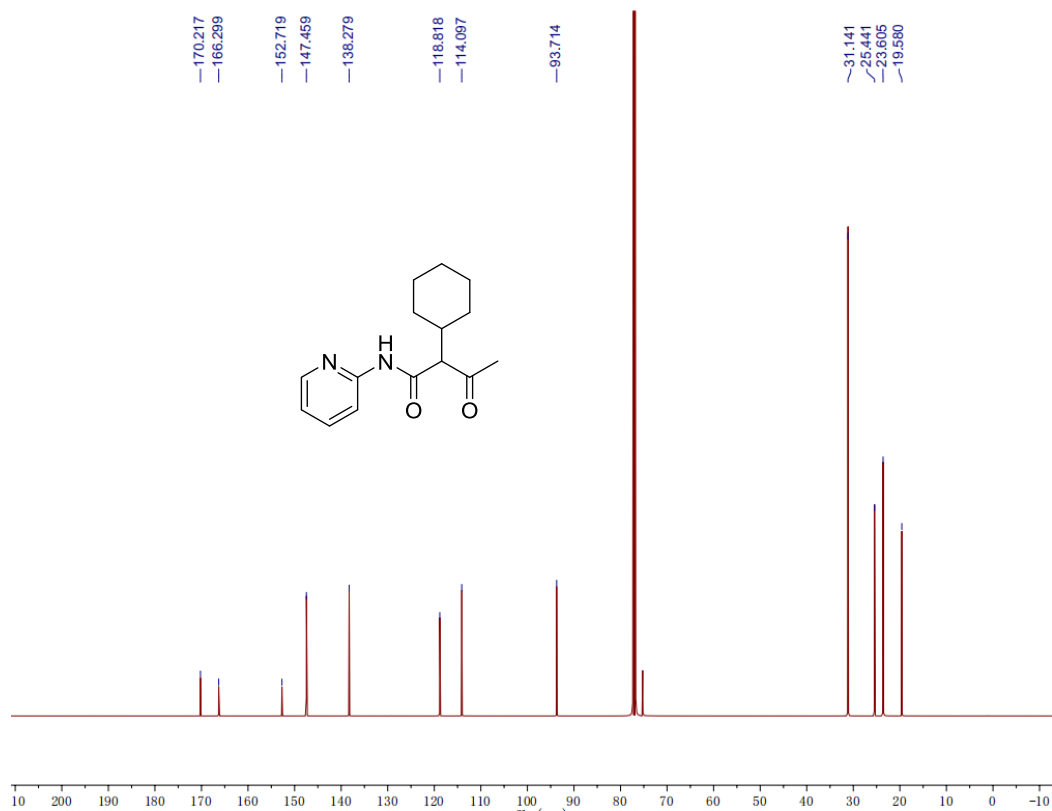

## 2-Cyclohexyl-3-oxo-N-(quinolin-2-yl)butanamide

[<sup>1</sup>H\_NMR\_600MHz\_(CDCl<sub>3</sub>:7.26 ppm)]

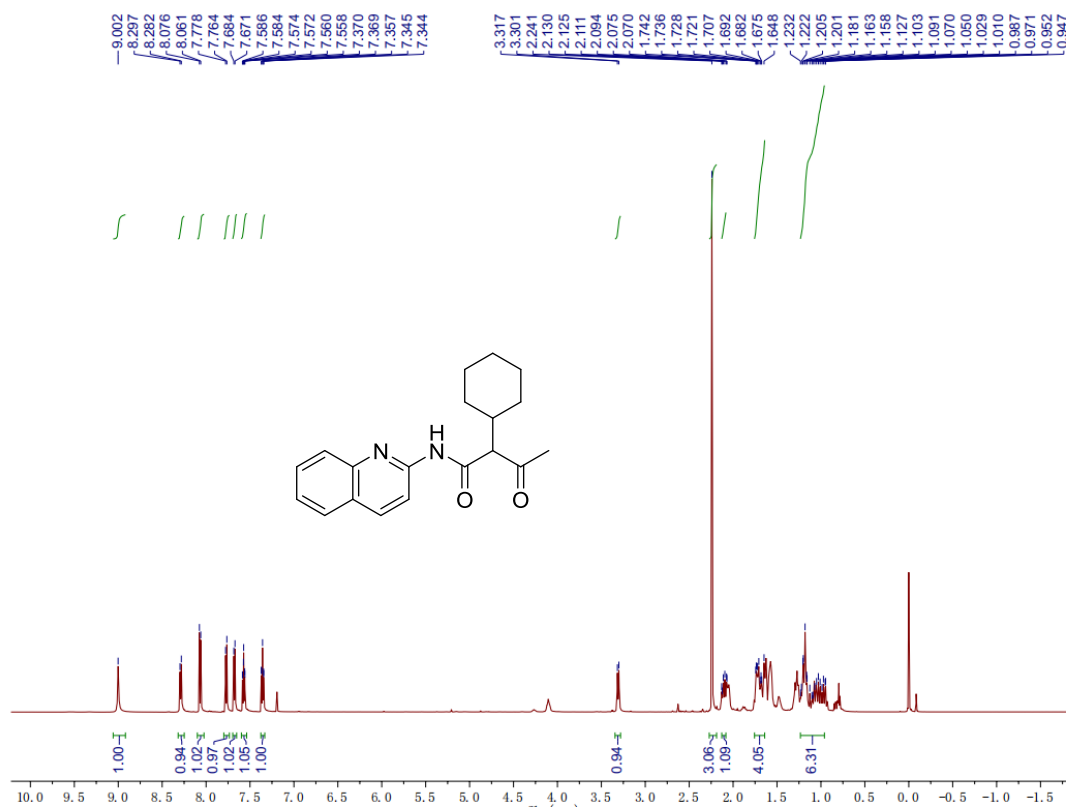

[<sup>13</sup>C\_NMR\_150MHz\_(CDCl<sub>3</sub>:77.00 ppm)]

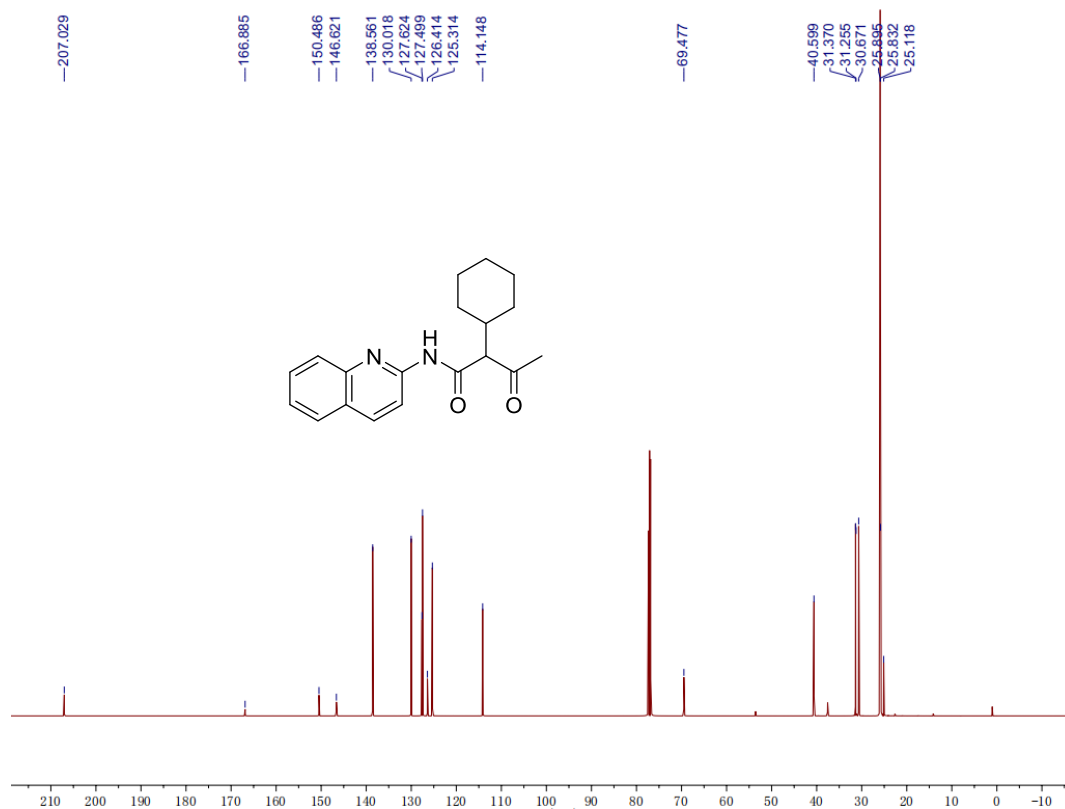

**2-Cyclohexyl-3-oxo-N-phenylpentanamide** [ $^1\text{H\_NMR\_600MHz\_}(\text{CDCl}_3:7.26 \text{ ppm})$ ]

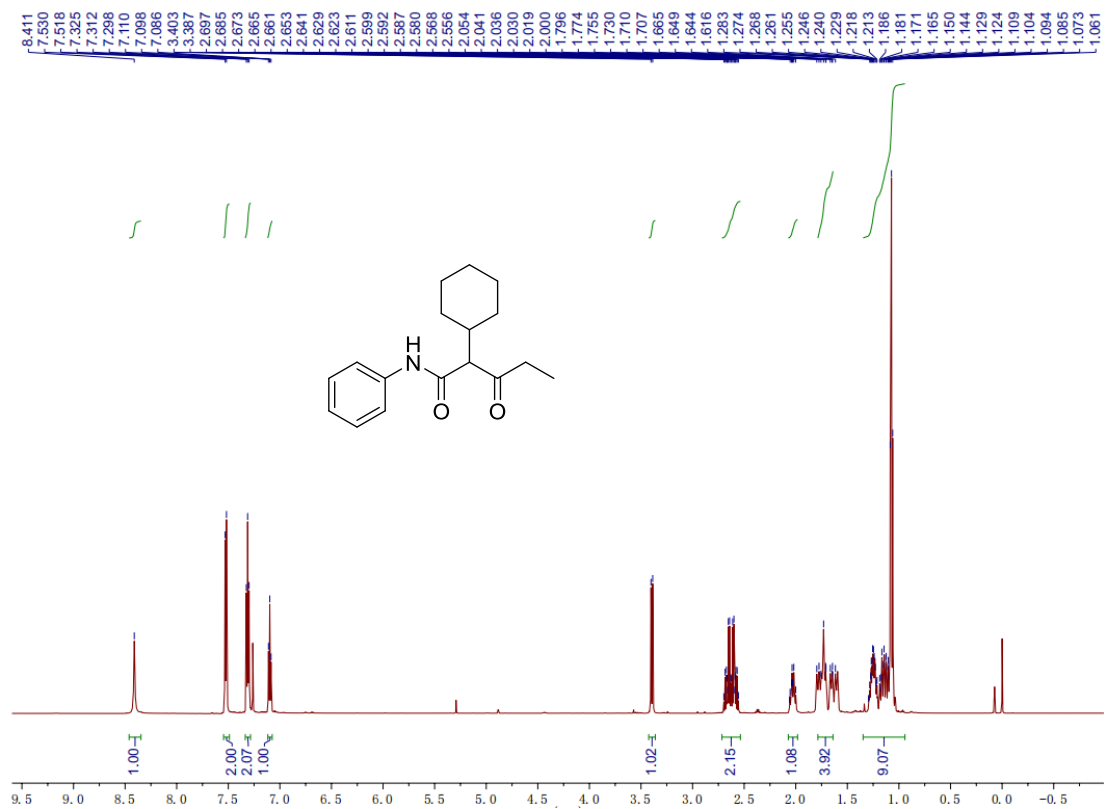

$^{13}\text{C\_NMR\_150MHz\_}(\text{CDCl}_3:77.00 \text{ ppm})$

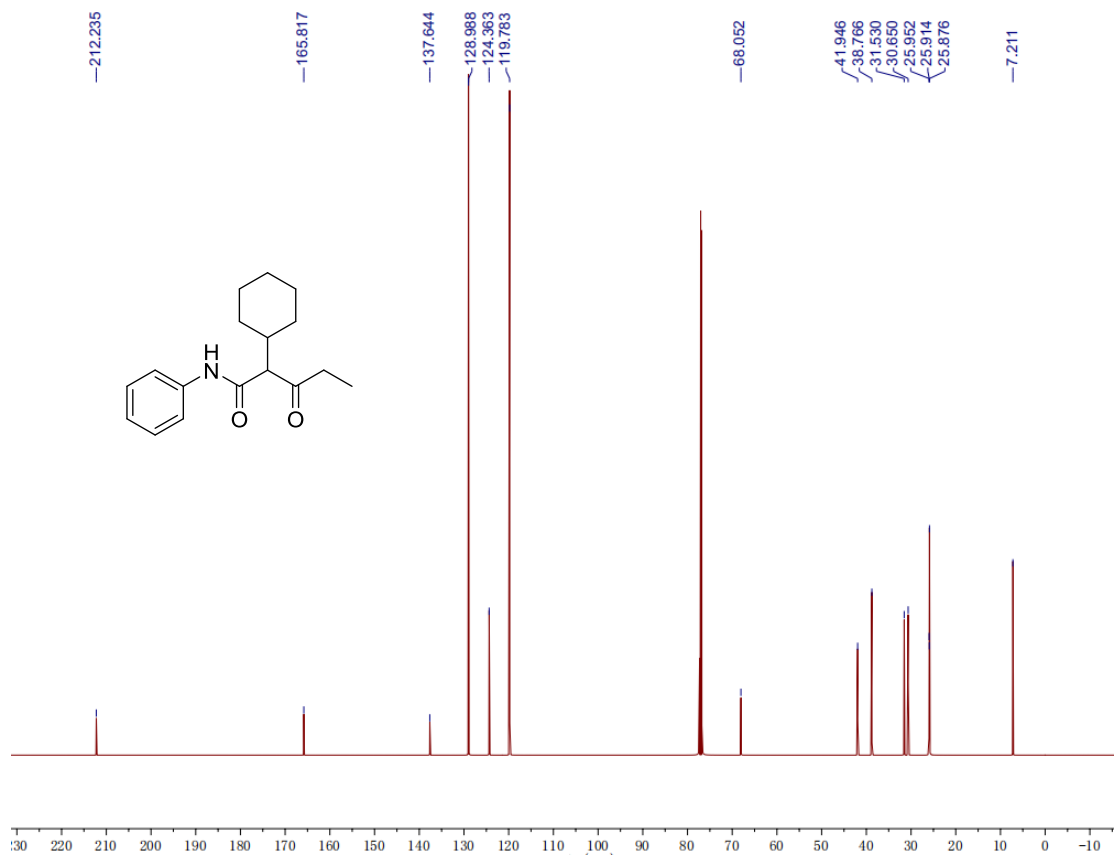

**2-Cyclohexyl-3-oxo-N-phenylhexanamide** [ $^1\text{H-NMR}$ \_600MHz\_( $\text{CDCl}_3$ :7.26 ppm)]

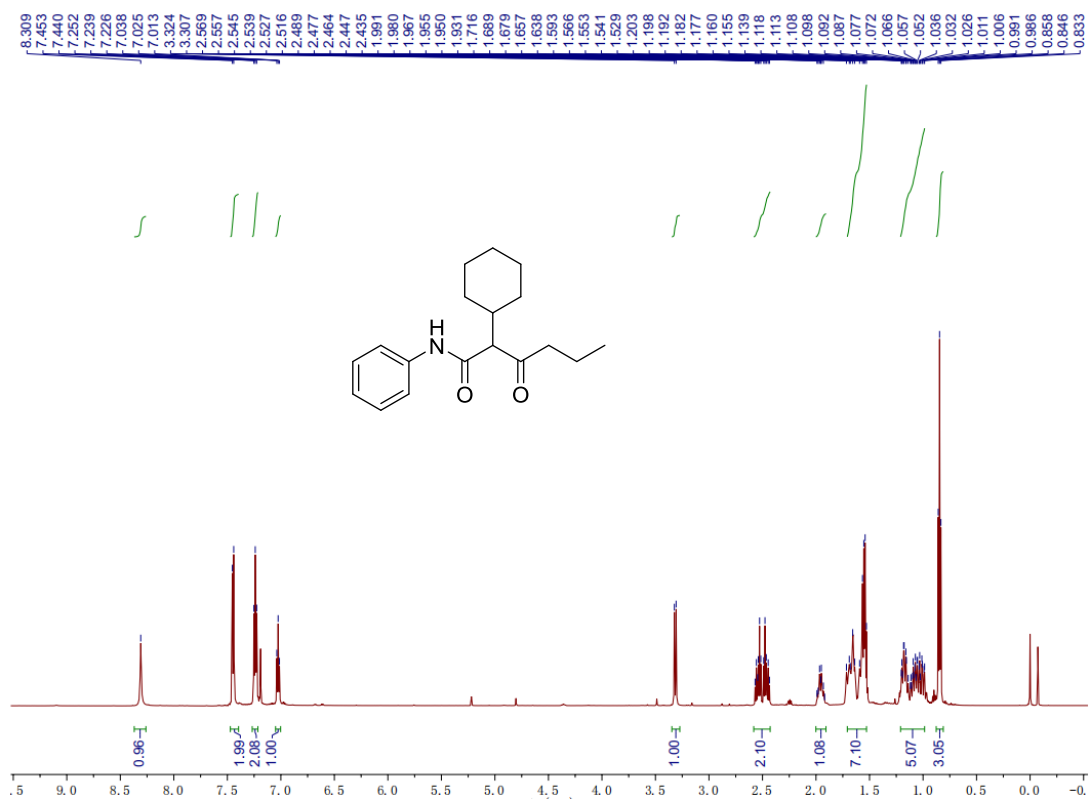

**2-Cyclohexyl-3-oxo-N-phenylhexanamide** [ $^{13}\text{C-NMR}$ \_150MHz\_( $\text{CDCl}_3$ :77.00 ppm)]

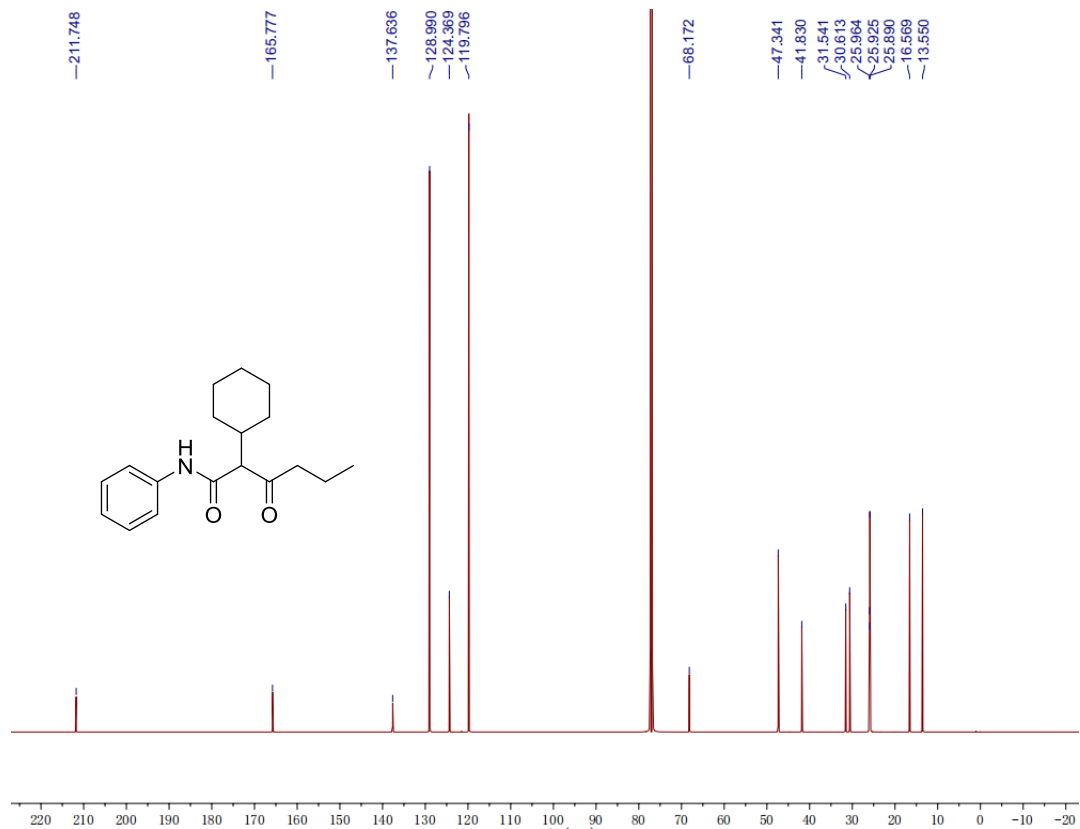

**2-Acetyl-2-hydroxy-N-phenylpentanamide** [ $^1\text{H-NMR}$ \_400MHz\_( $\text{CDCl}_3$ :7.26 ppm)]

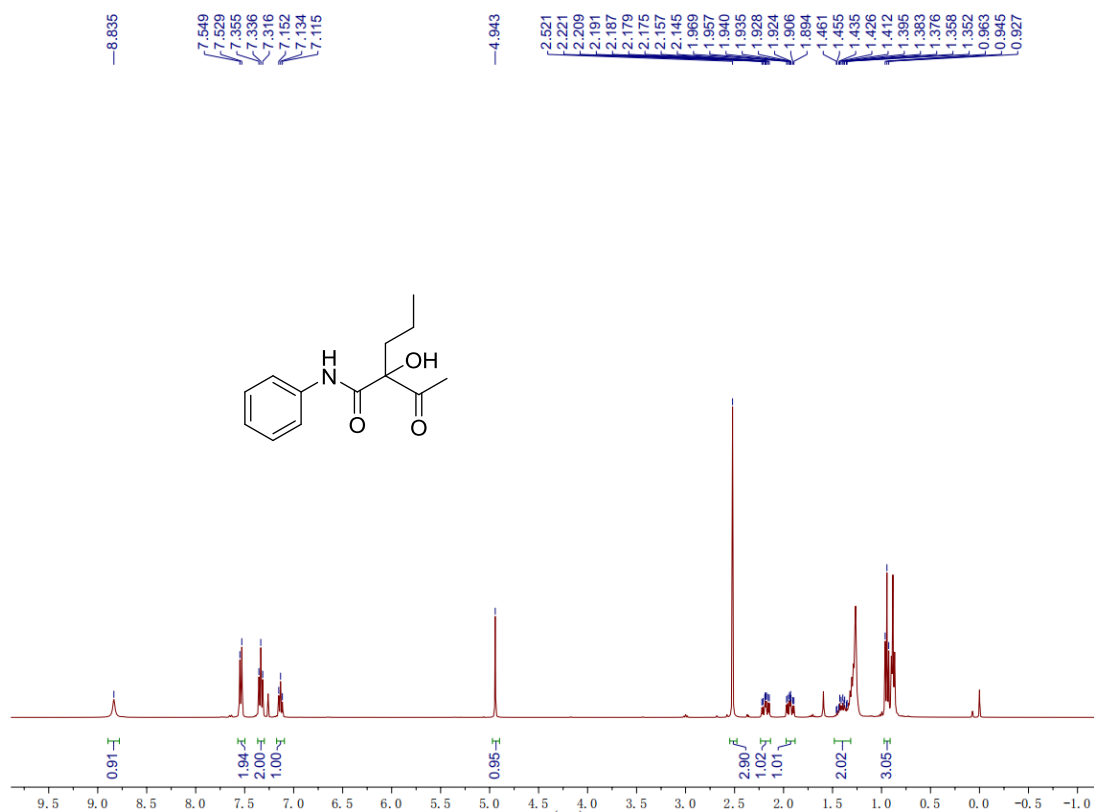

**[ $^{13}\text{C-NMR}$ \_150MHz\_( $\text{CDCl}_3$ :77.00 ppm)]**

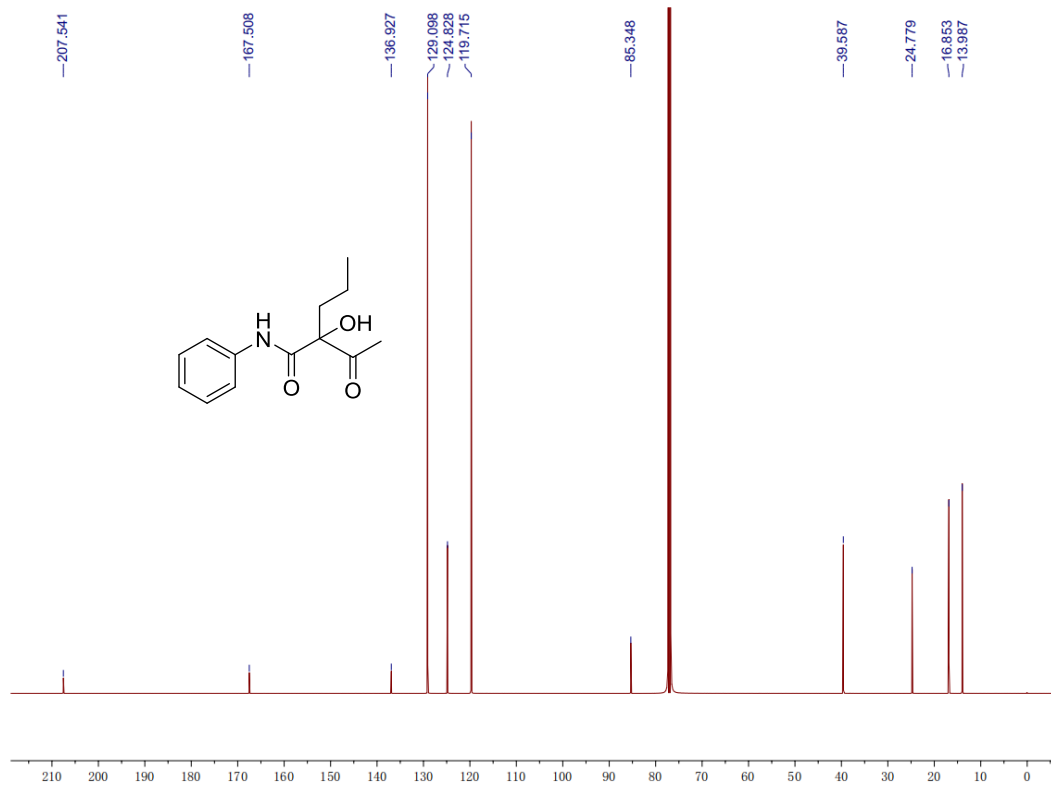



**2-Cyclohexyl-2-hydroxy-3-oxo-N-phenylbutanamide**[<sup>1</sup>H\_NMR\_400MHz\_(CDCl<sub>3</sub>:7.26 ppm)]

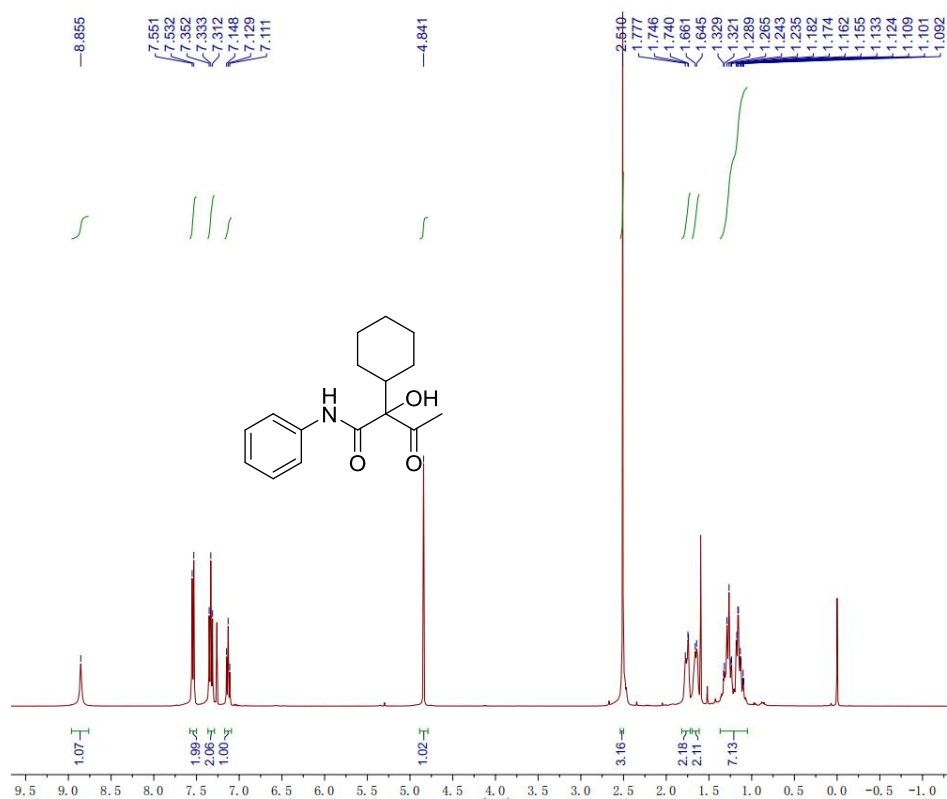

[<sup>13</sup>C\_NMR\_150MHz\_(CDCl<sub>3</sub>:77.00 ppm)]

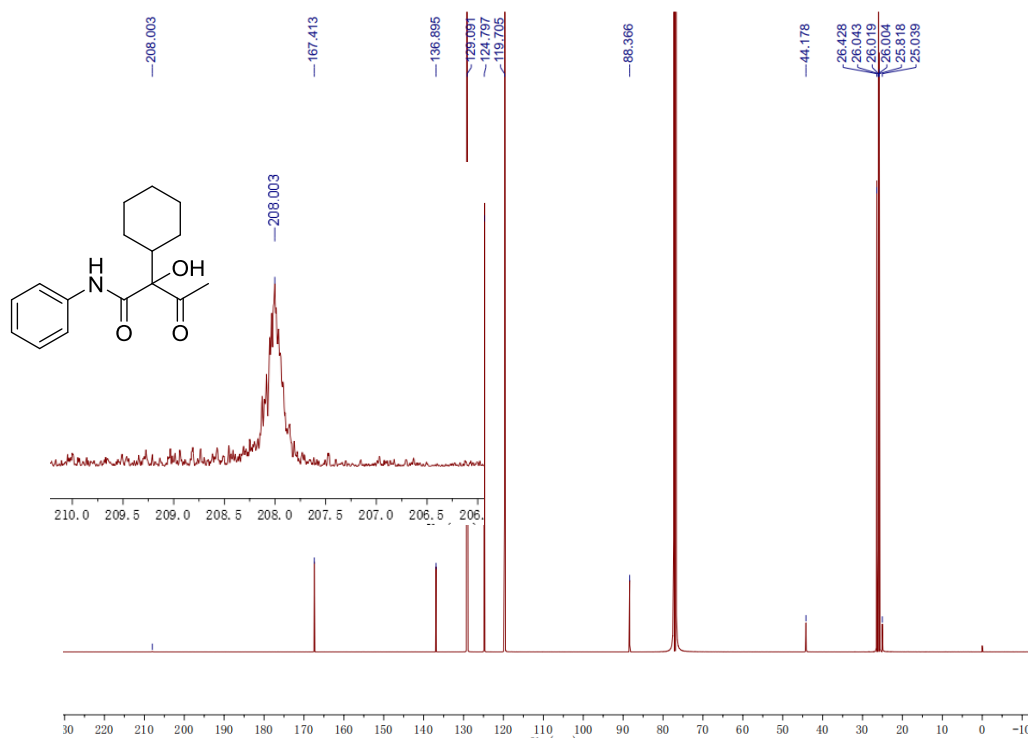

**2-Cyclopentyl-2-hydroxy-3-oxo-N-phenylbutanamide** [ $^1\text{H-NMR}_{600\text{MHz}}(\text{CDCl}_3:7.26 \text{ ppm})$ ]

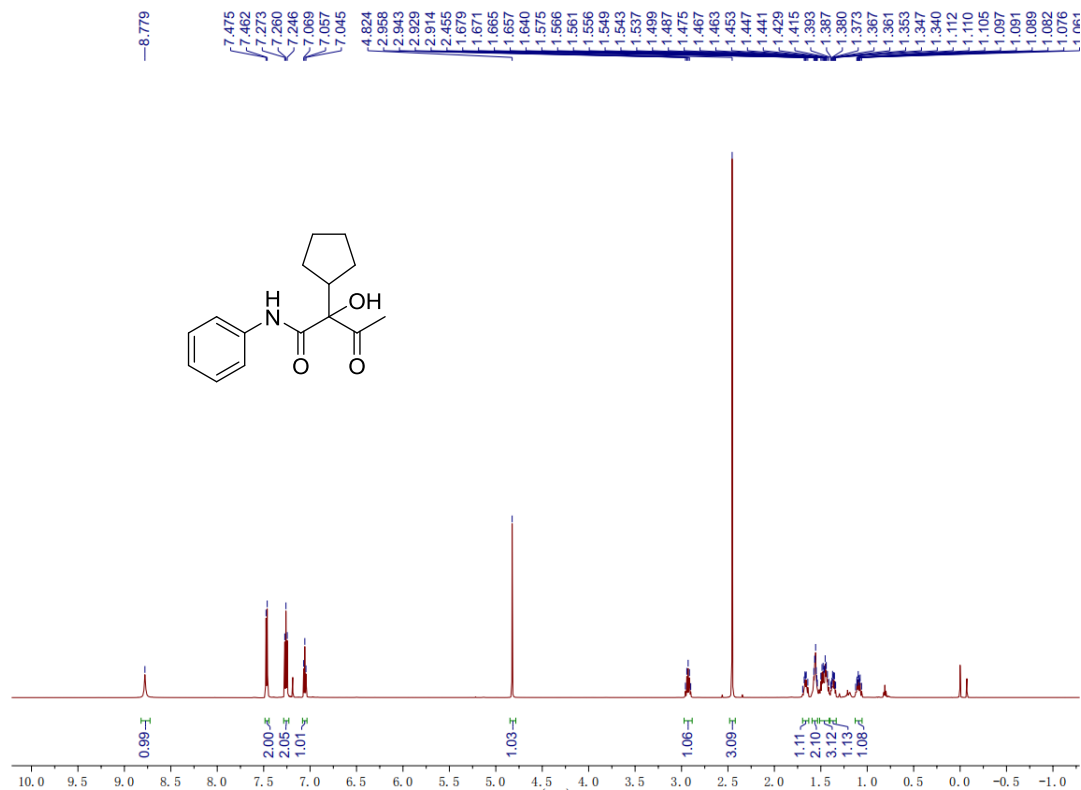

$^{13}\text{C-NMR}_{150\text{MHz}}(\text{CDCl}_3:77.00 \text{ ppm})$

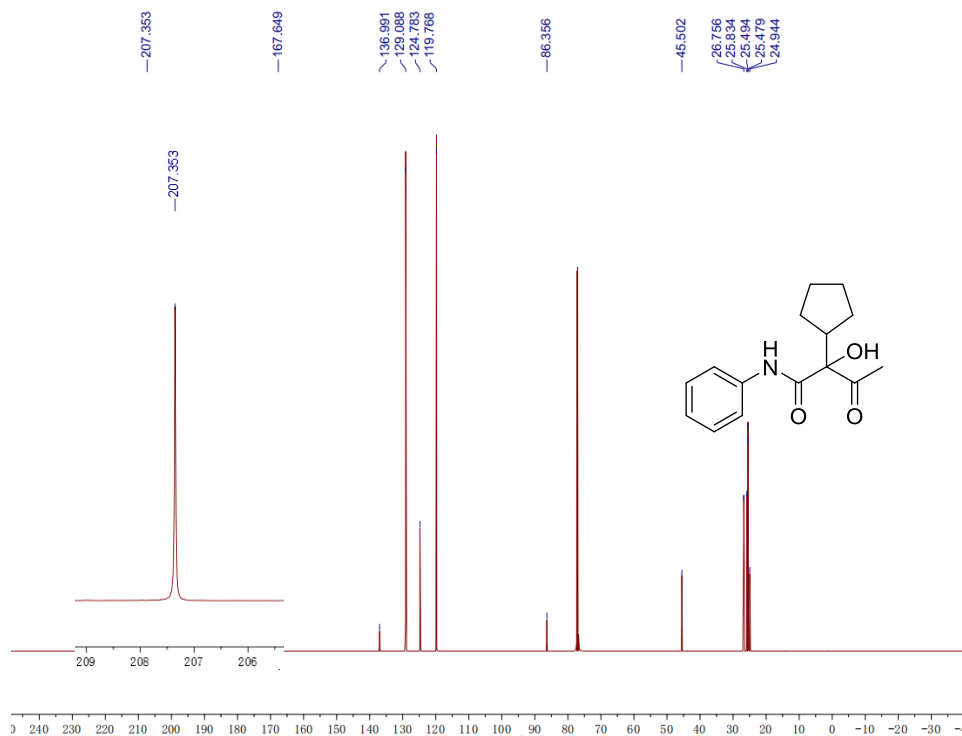

# 2-Cycloheptyl-2-hydroxy-3-oxo-N-phenylbutanamide

[<sup>1</sup>H\_NMR\_400MHz\_(CDCl<sub>3</sub>:7.26 ppm)]

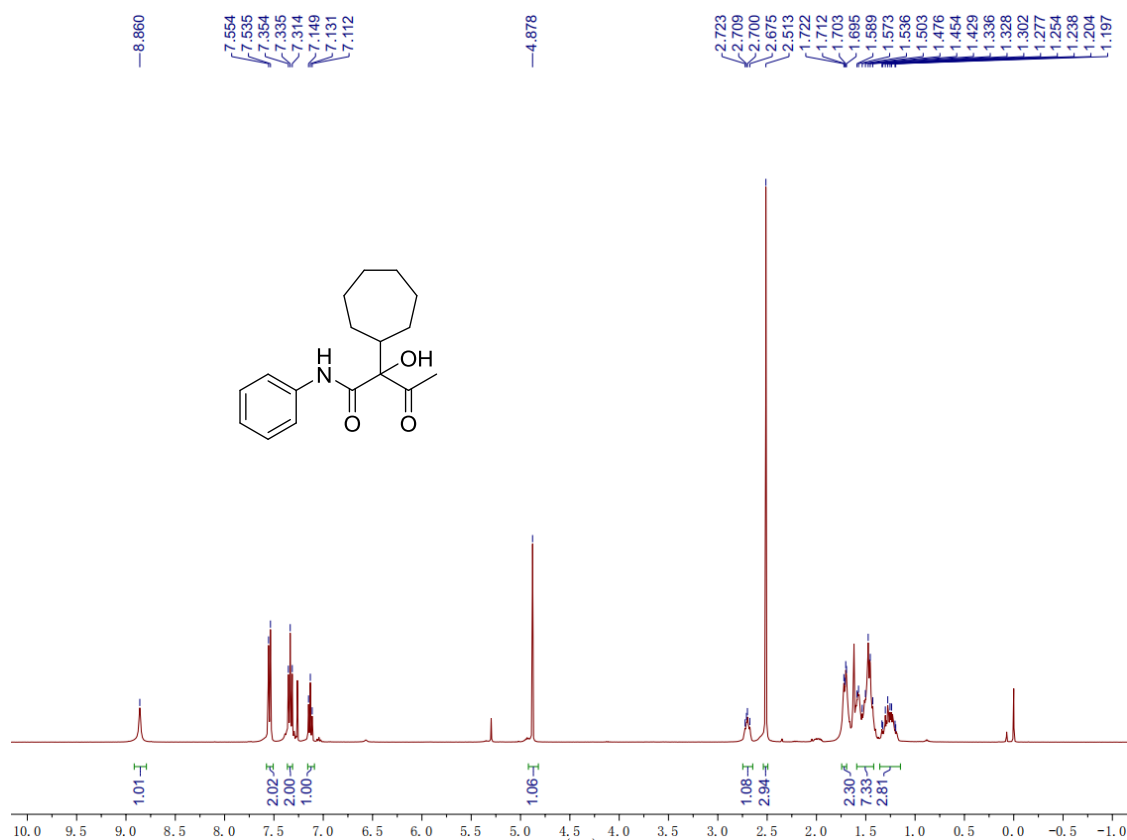

[<sup>13</sup>C\_NMR\_150MHz\_(CDCl<sub>3</sub>:77.00 ppm)]

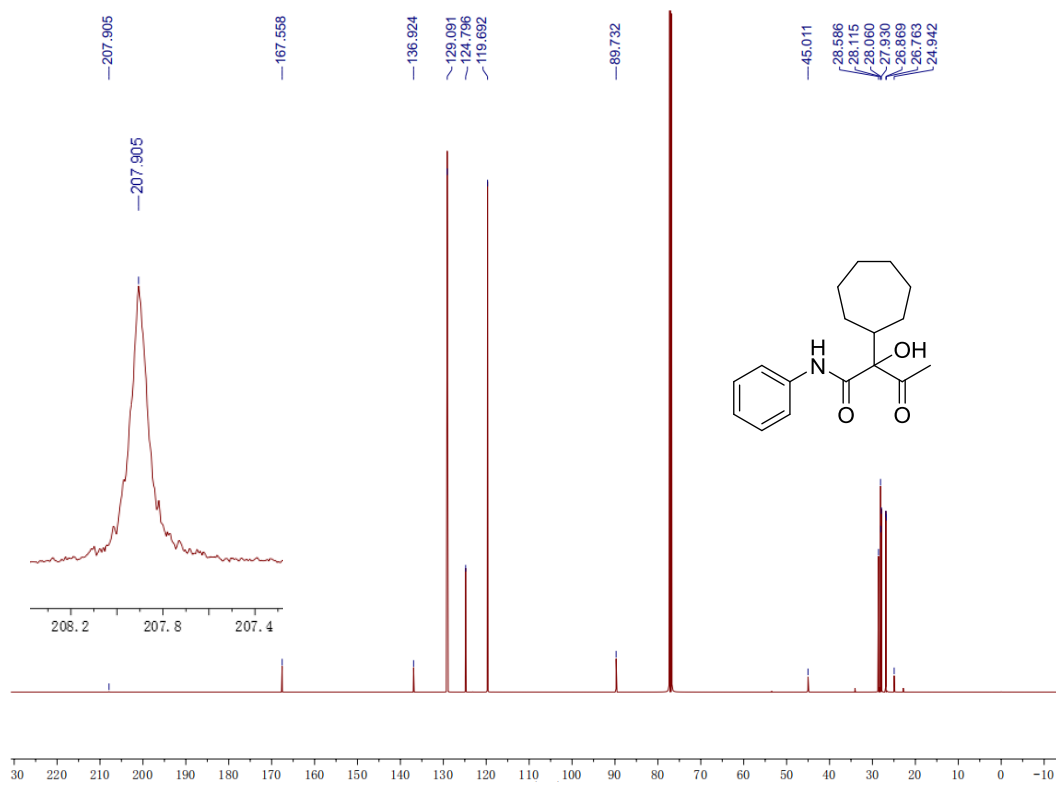

**2-Acetyl-2-hydroxy-N-phenylpent-4-enamide** [ $^1\text{H\_NMR\_400MHz\_}(\text{CDCl}_3:7.26 \text{ ppm})$ ]

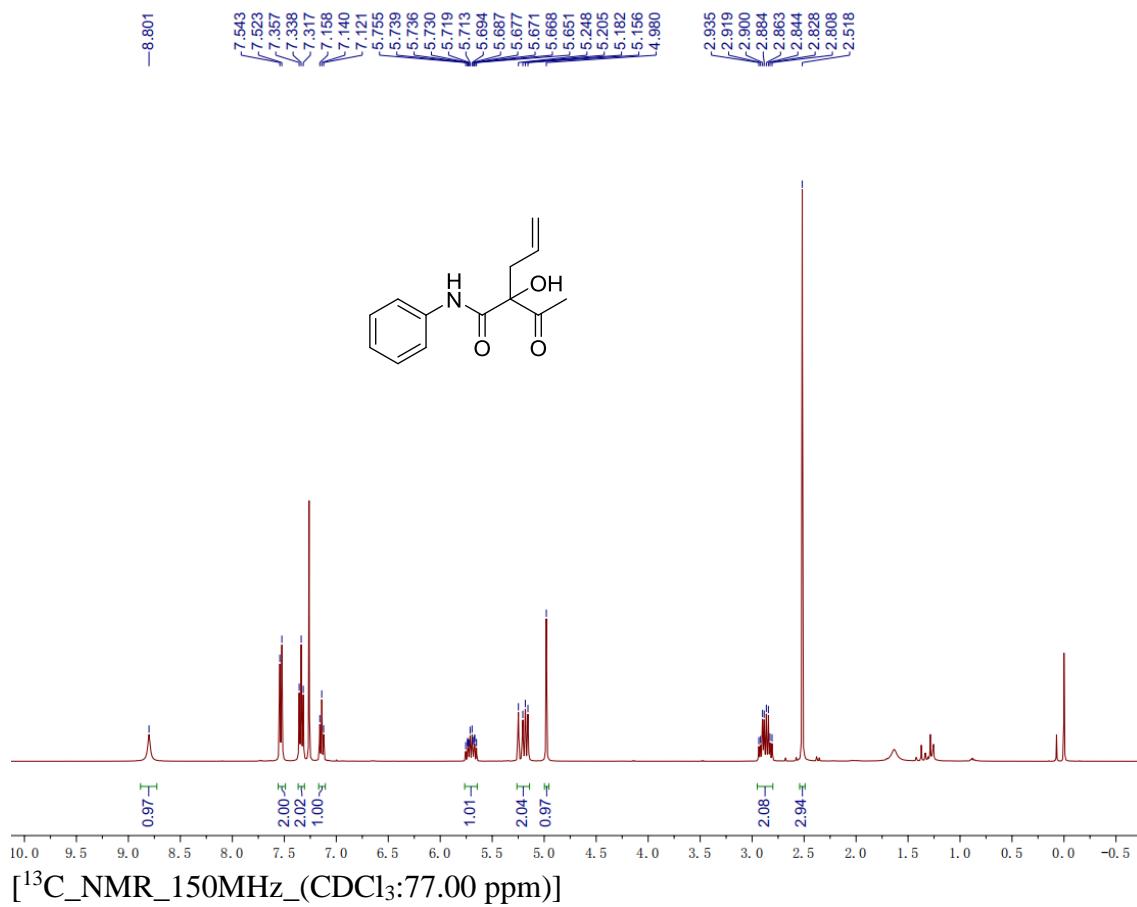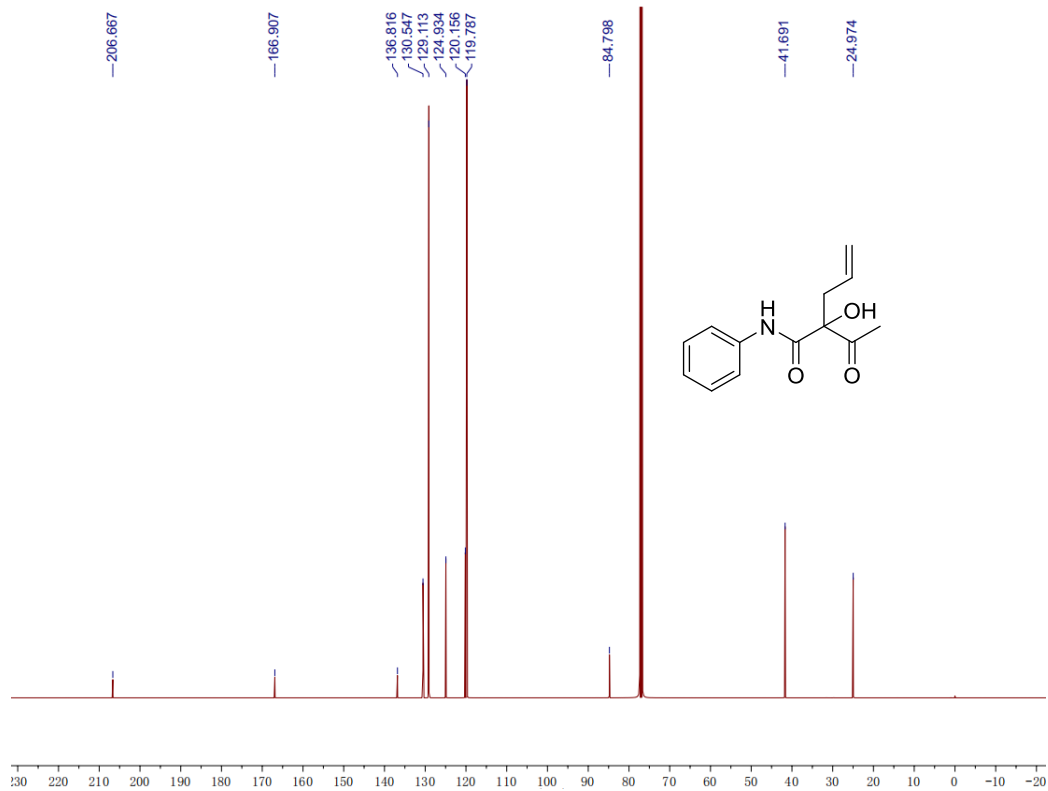

***N*-(4-Chlorophenyl)-2-cyclohexyl-2-hydroxy-3-oxobutanamide** [<sup>1</sup>H\_NMR\_400MHz\_(CDCl<sub>3</sub>:7.26 ppm)]

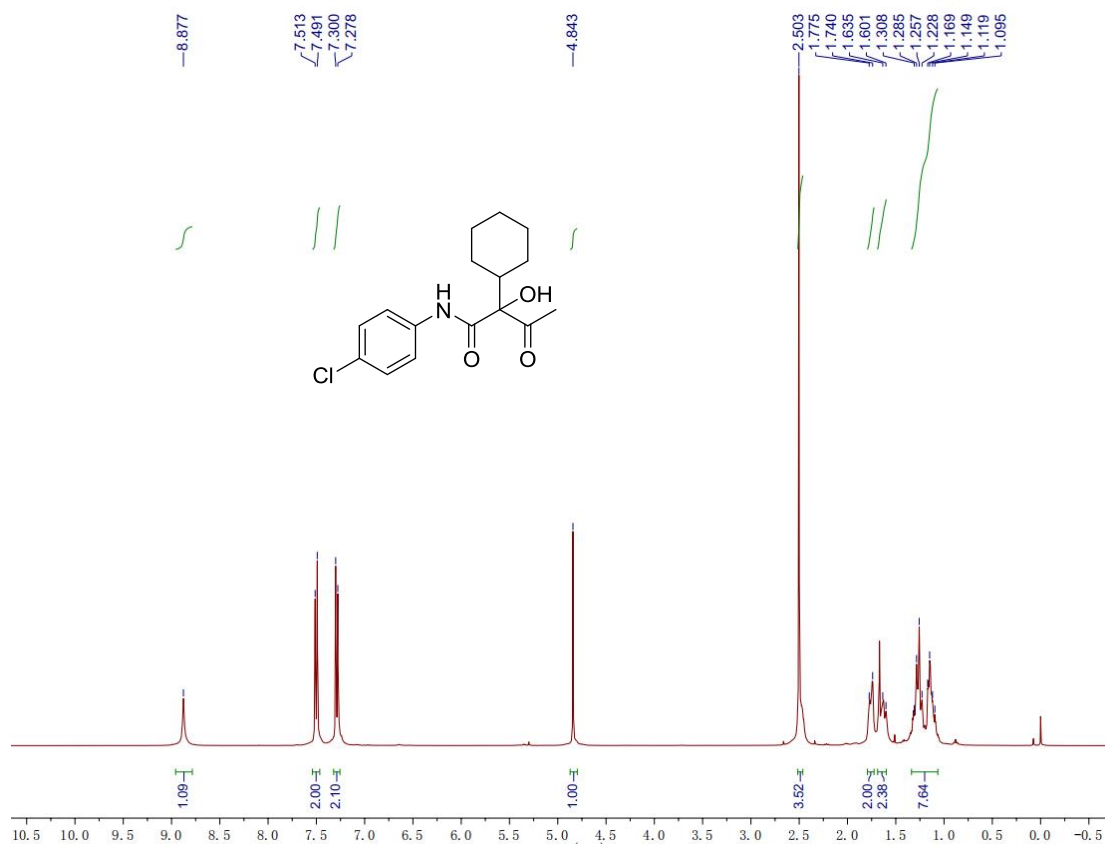

***N*-(4-Chlorophenyl)-2-cyclohexyl-2-hydroxy-3-oxobutanamide** [<sup>13</sup>C\_NMR\_150MHz\_(CDCl<sub>3</sub>:77.00 ppm)]

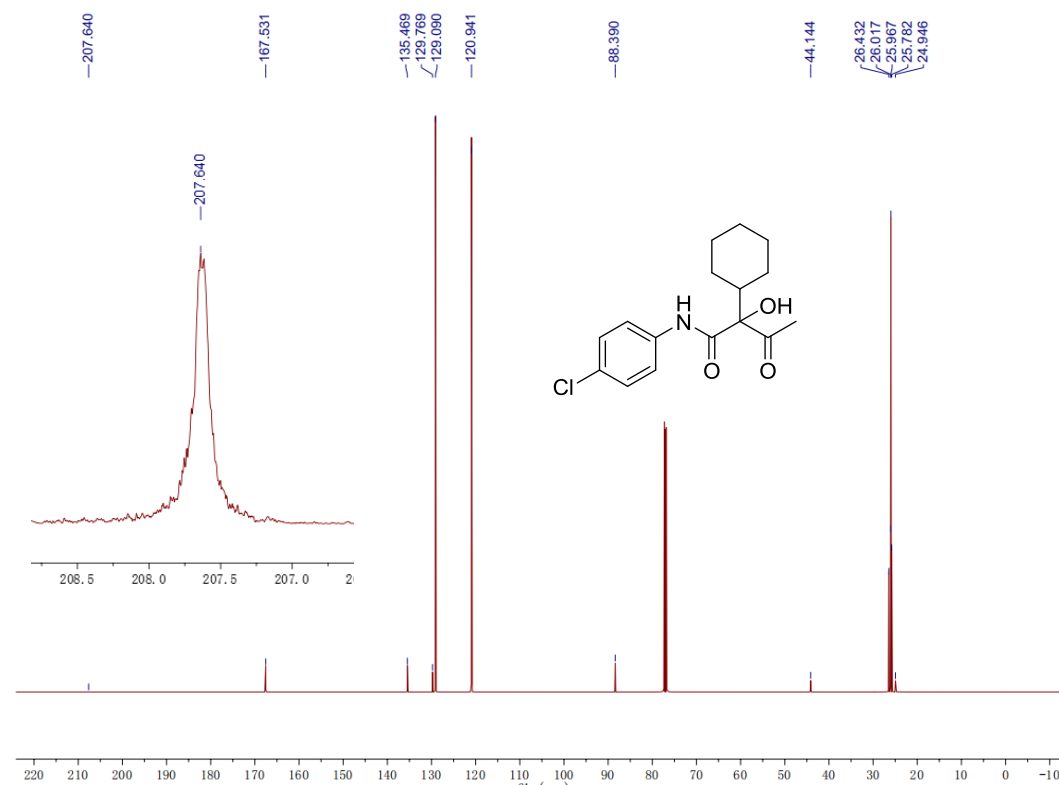

**2-Cyclohexyl-N-(4-fluorophenyl)-2-hydroxy-3-oxobutanamide** [ $^1\text{H\_NMR\_400MHz\_}(\text{CDCl}_3:7.26 \text{ ppm})$ ]

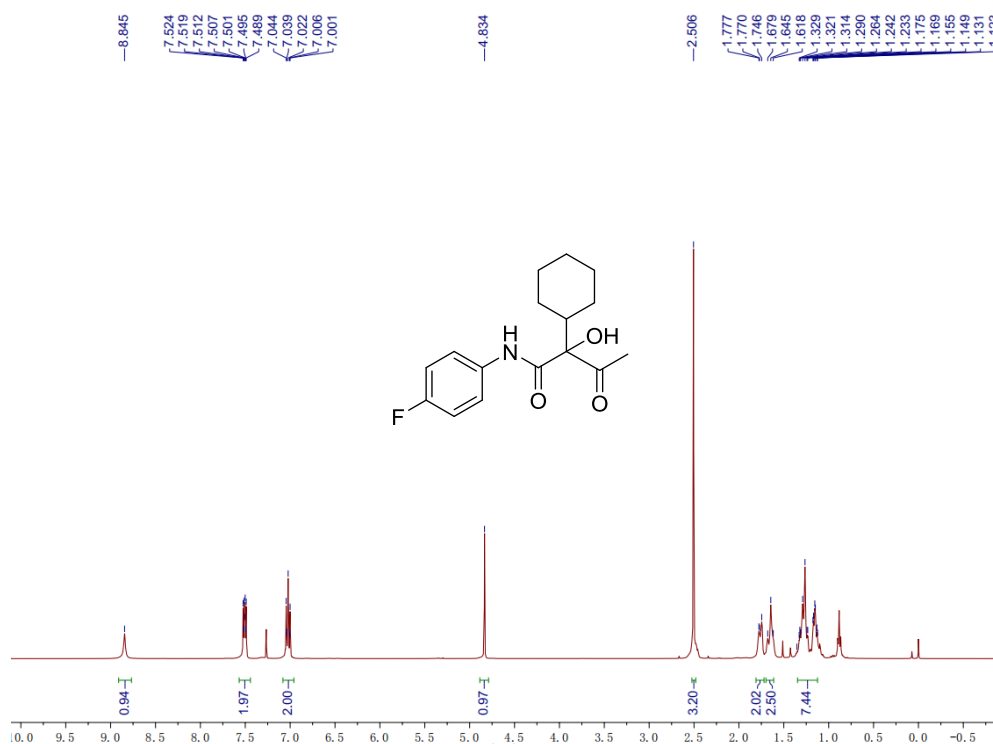

[ $^{13}\text{C\_NMR\_150MHz\_}(\text{CDCl}_3:77.00 \text{ ppm})$ ]

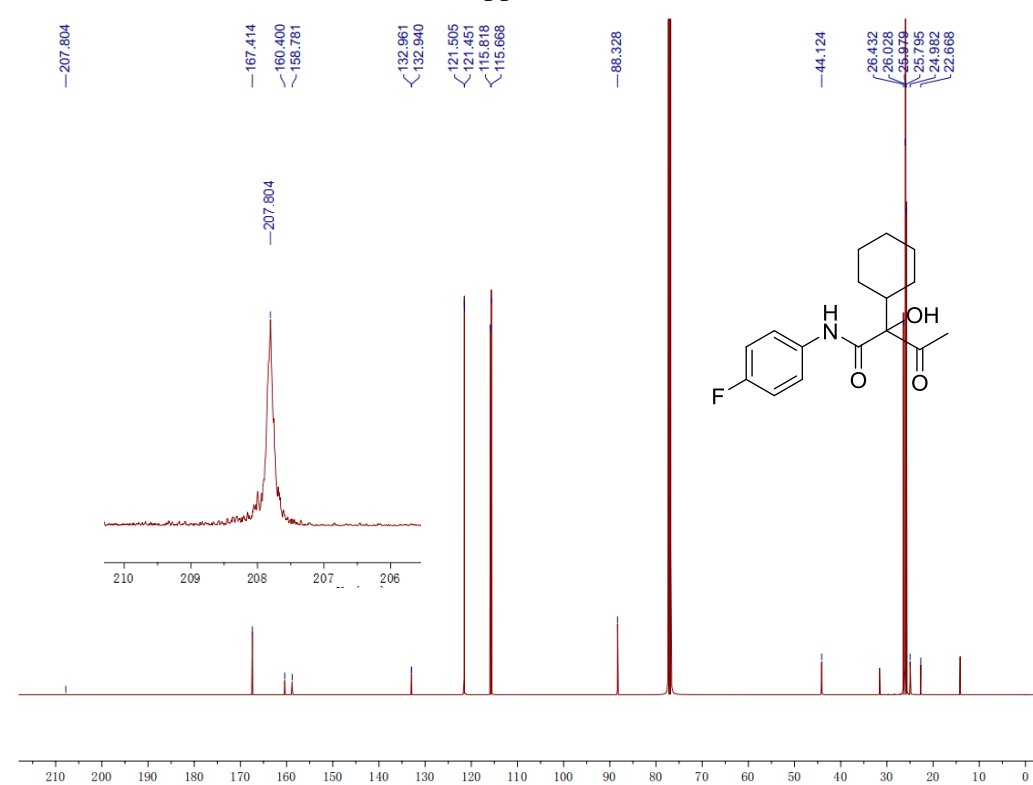

**2-Cyclohexyl-2-hydroxy-3-oxo-N-(p-tolyl)butanamide** [ $^1\text{H\_NMR\_400MHz\_}(\text{CDCl}_3:7.26 \text{ ppm})$ ]

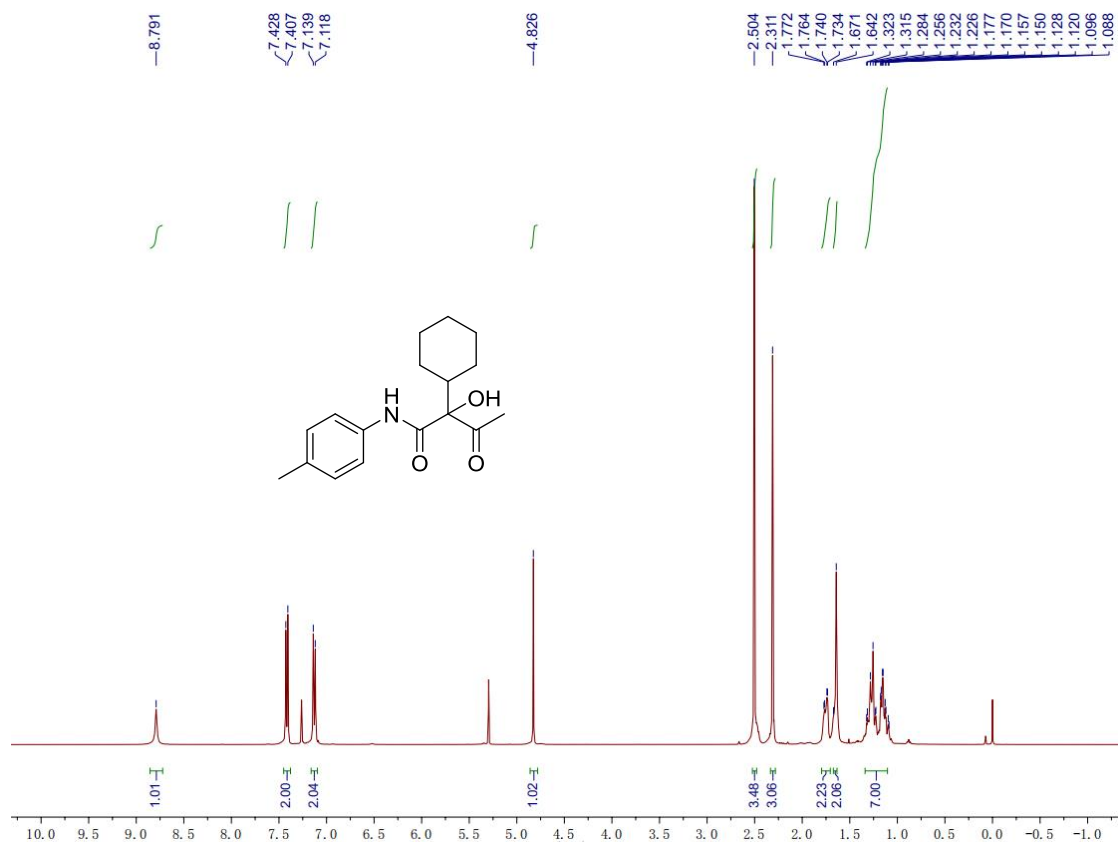

$^{13}\text{C\_NMR}$  150MHz ( $\text{CDCl}_3:77.00 \text{ ppm}$ )

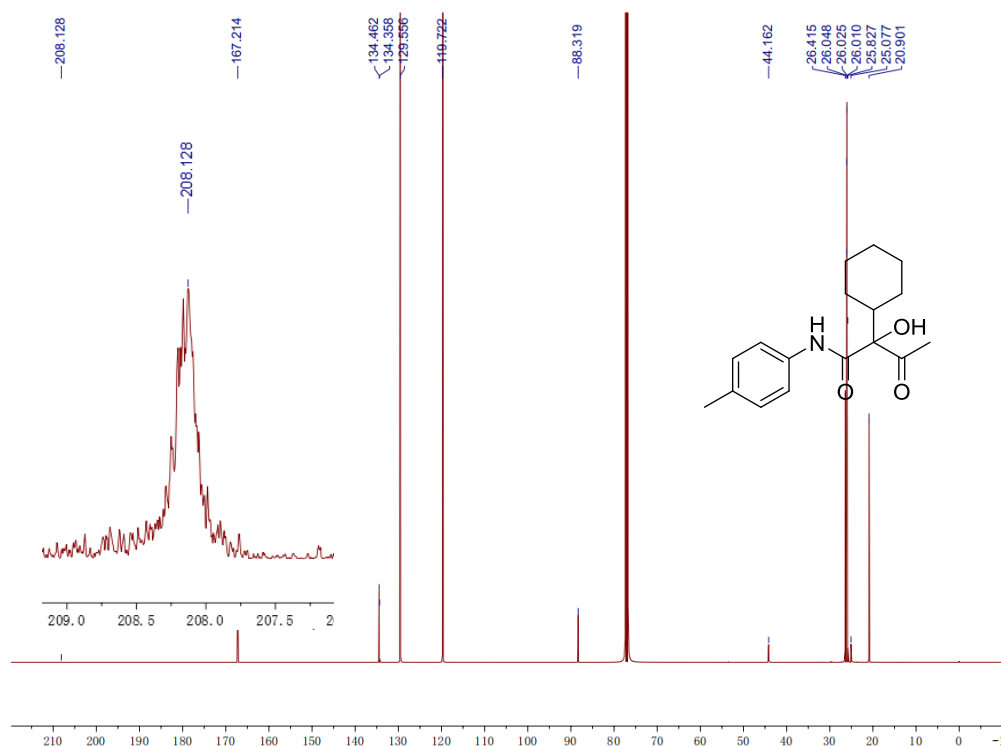

***N*-(4-(tert-Butyl)phenyl)-2-cyclohexyl-2-hydroxy-3-oxobutanamide** [<sup>1</sup>H\_NMR\_400MHz\_(CDCl<sub>3</sub>:7.26 ppm)]

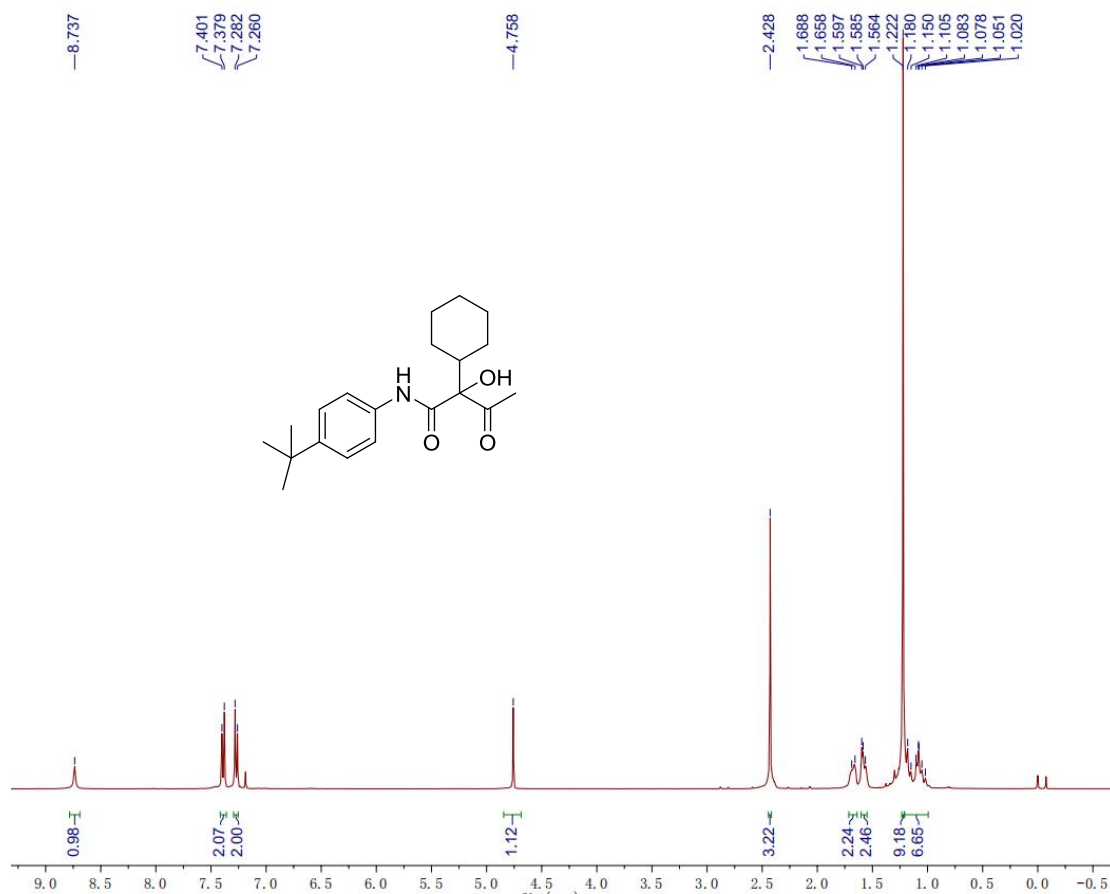

[<sup>13</sup>C\_NMR\_150MHz\_(CDCl<sub>3</sub>:77.00 ppm)]

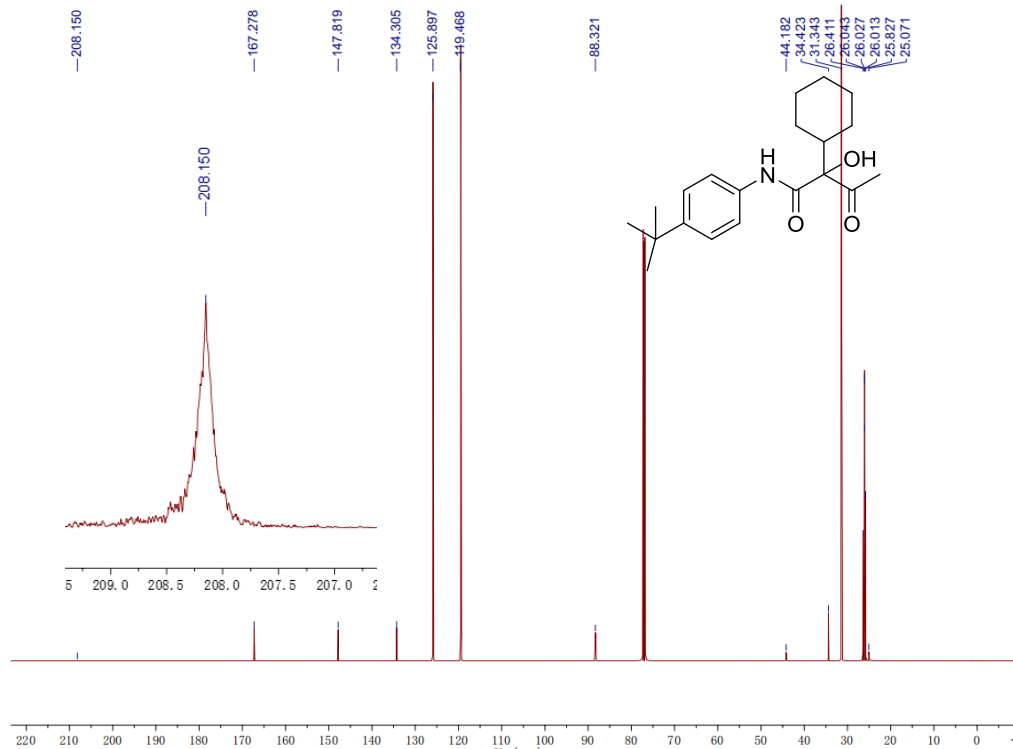



**2-Cyclohexyl-2-hydroxy-N-(4-methoxyphenyl)-3-oxobutanamide** [<sup>1</sup>H\_NMR\_400MHz\_(CDCl<sub>3</sub>:7.26 ppm)]

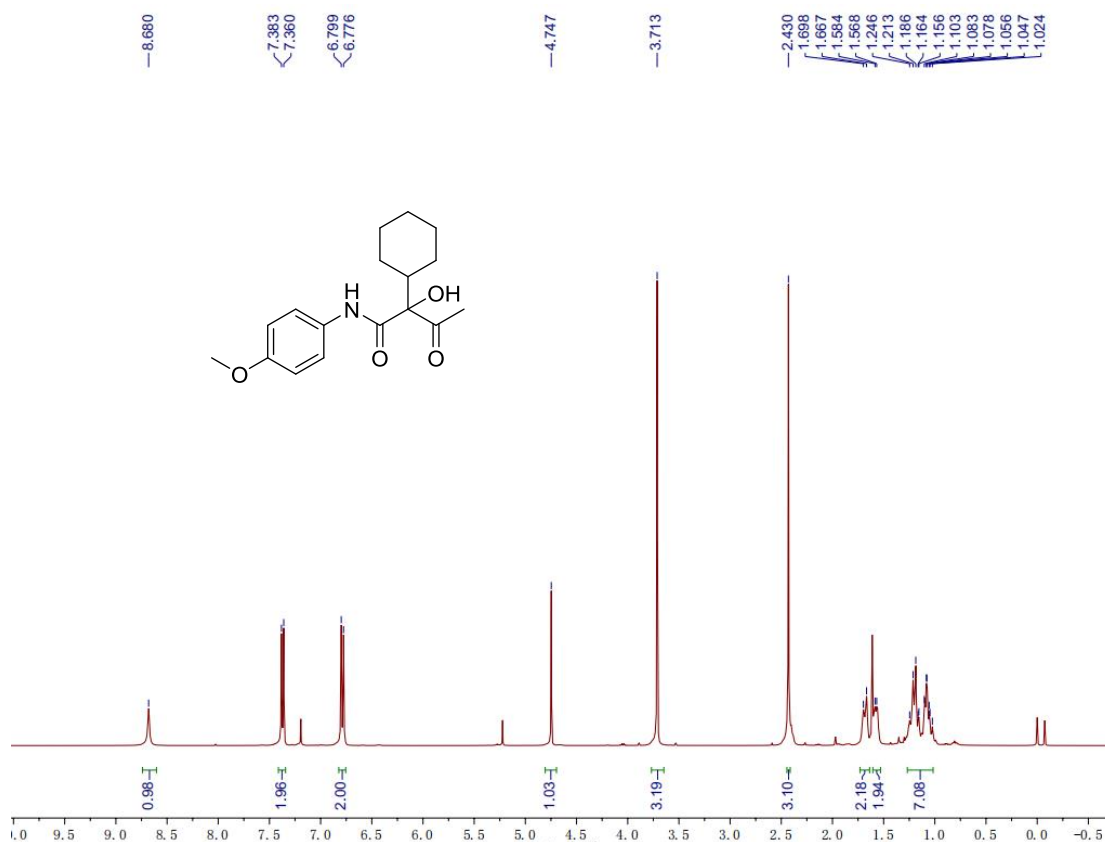

[<sup>13</sup>C\_NMR\_150MHz\_(CDCl<sub>3</sub>:77.00 ppm)]

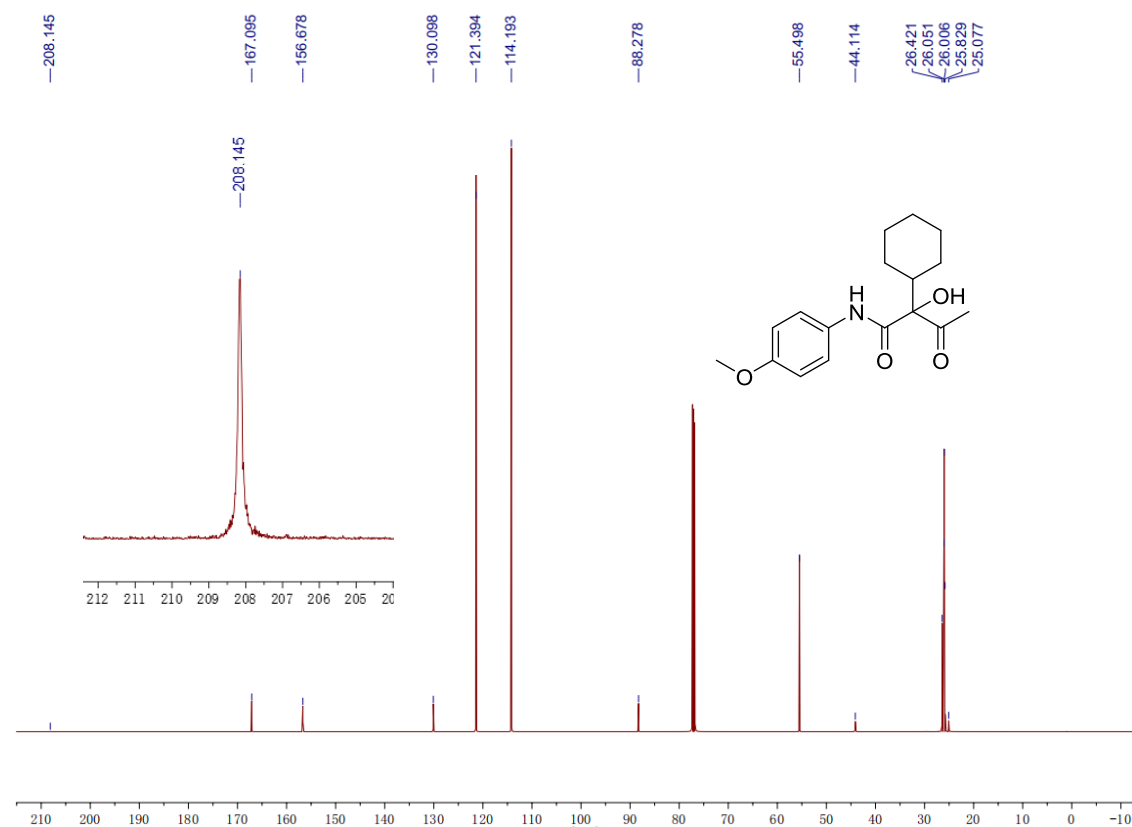

**2-Cyclohexyl-N-(4-ethoxyphenyl)-2-hydroxy-3-oxobutanamide** [<sup>1</sup>H\_NMR\_400MHz\_(CDCl<sub>3</sub>:7.26 ppm)]

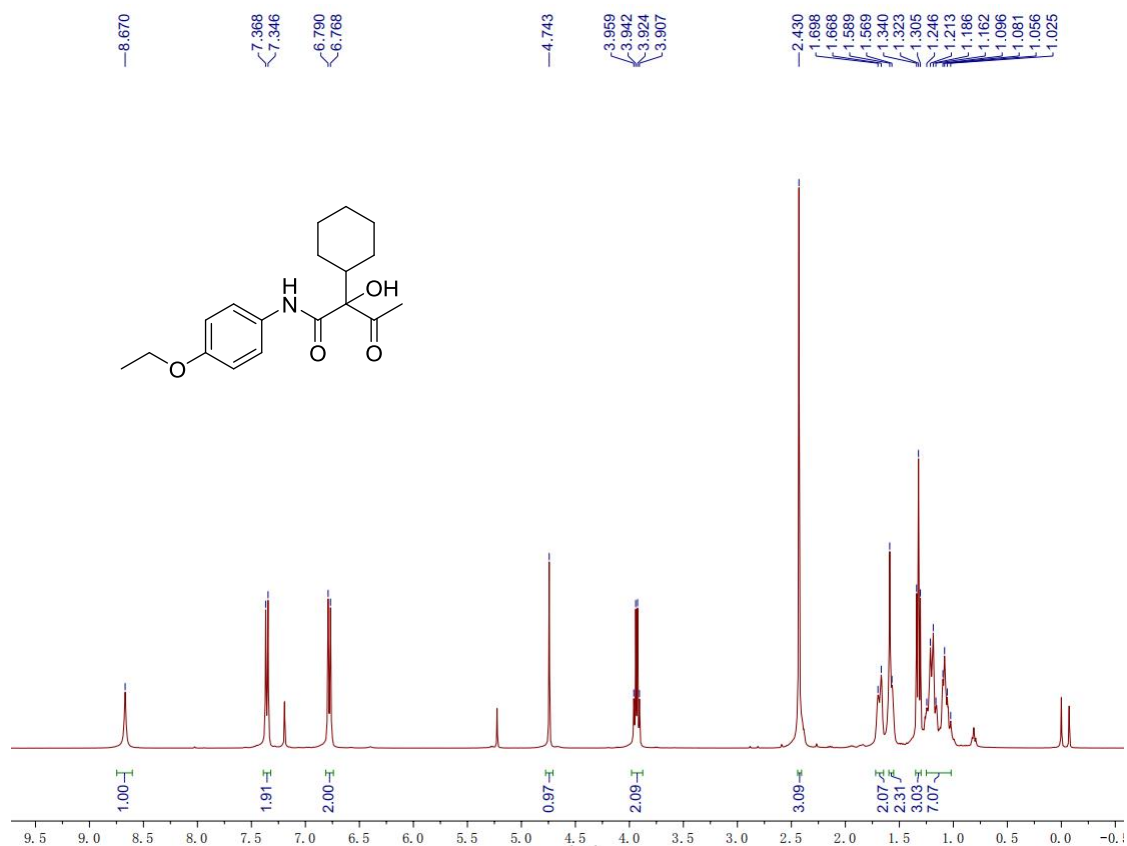

**[<sup>13</sup>C\_NMR\_150MHz\_(CDCl<sub>3</sub>:77.00 ppm)]**

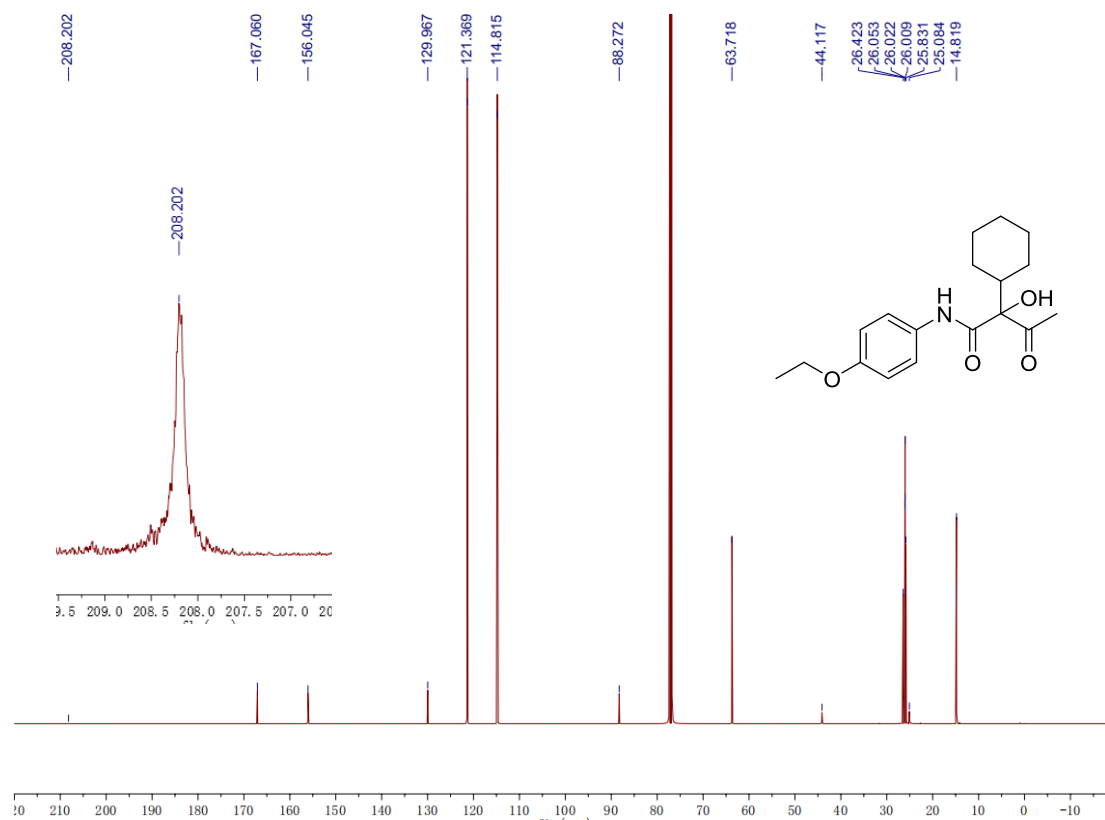

***N*-(3-Chlorophenyl)-2-cyclohexyl-2-hydroxy-3-oxobutanamide** [<sup>1</sup>H\_NMR\_400MHz\_(CDCl<sub>3</sub>:7.26 ppm)]

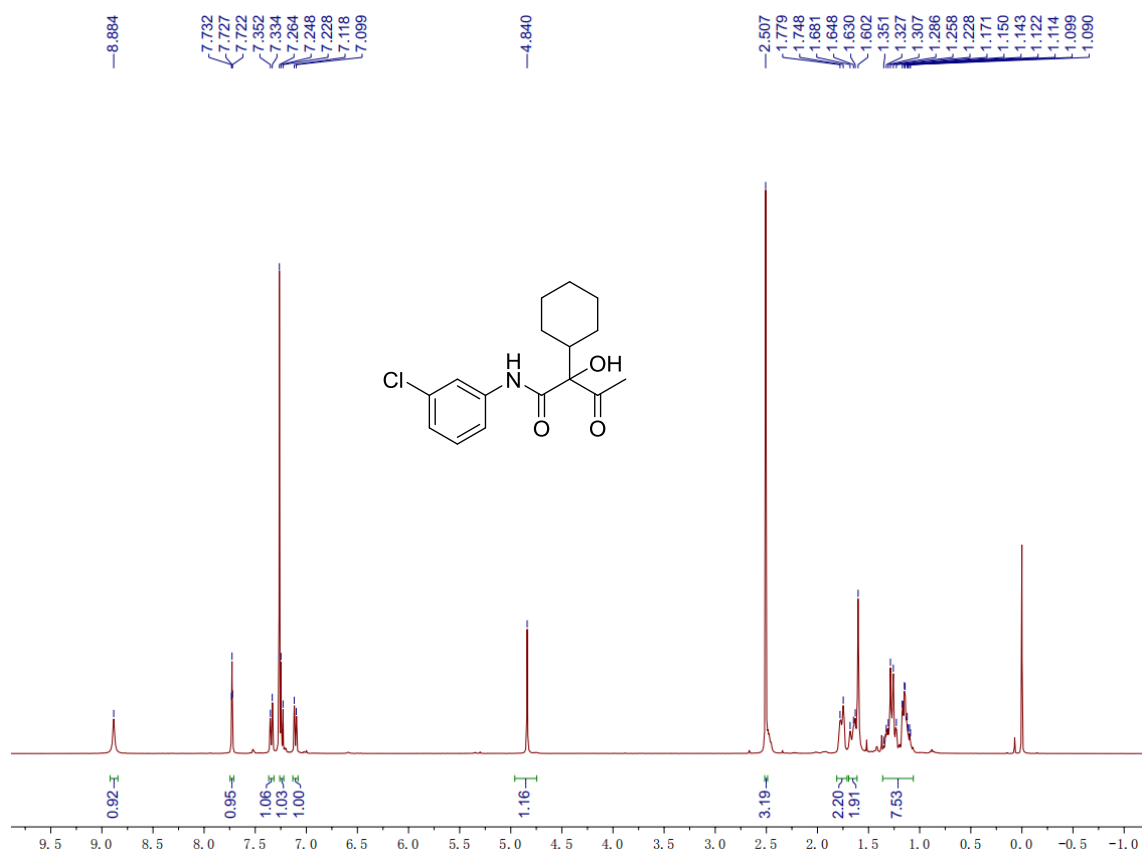

[<sup>13</sup>C\_NMR\_150MHz\_(CDCl<sub>3</sub>:77.00 ppm)]

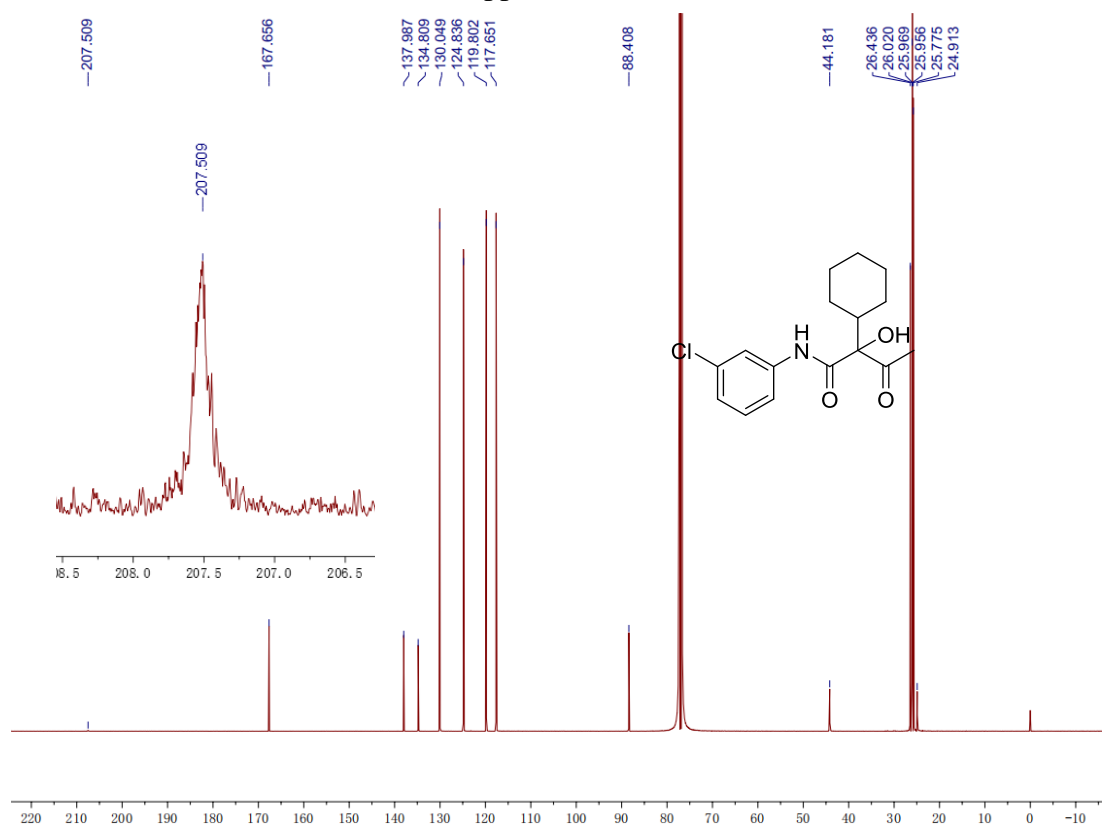

**2-Cyclohexyl-2-hydroxy-3-oxo-N-(m-tolyl)butanamide** [ $^1\text{H-NMR}$ \_600MHz\_( $\text{CDCl}_3$ :7.26 ppm)]

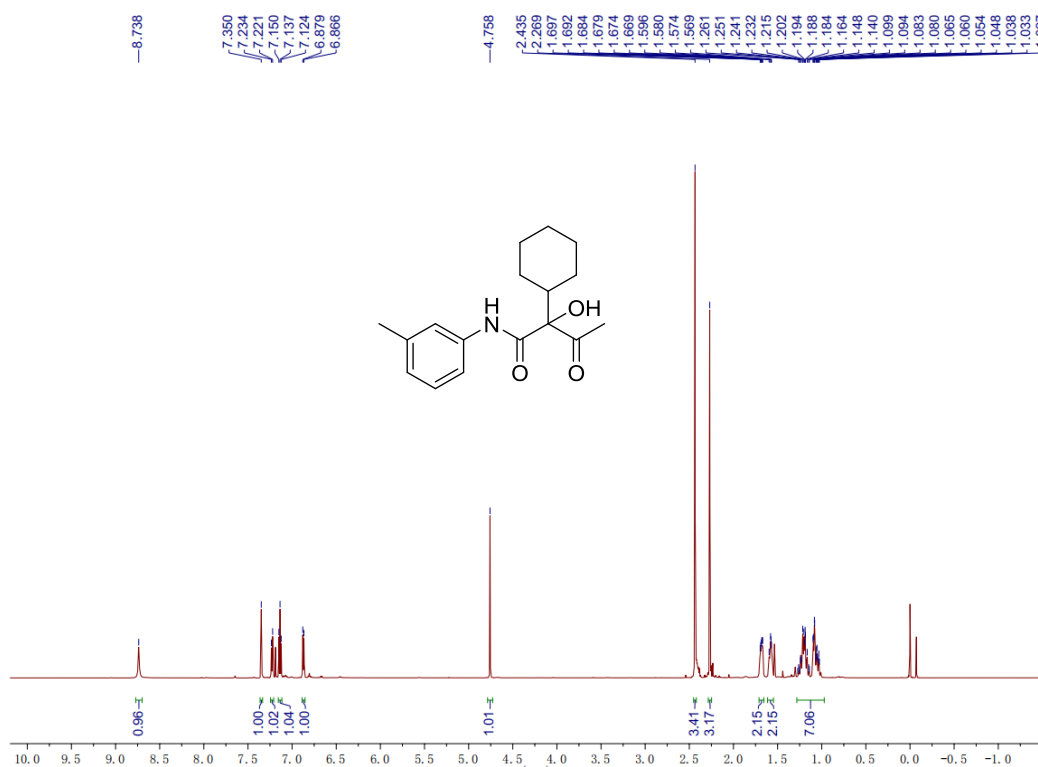

$^{13}\text{C-NMR}$ \_150MHz\_( $\text{CDCl}_3$ :77.00 ppm)]

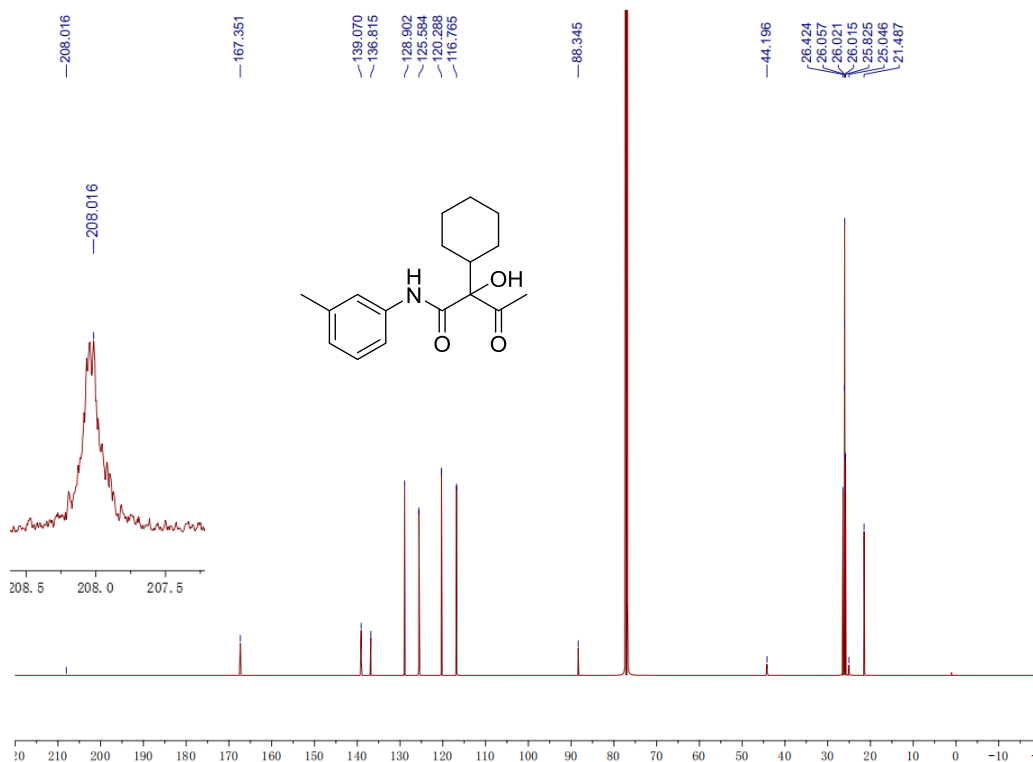

***N*-(2-Chlorophenyl)-2-cyclohexyl-2-hydroxy-3-oxobutanamide** [ $^1\text{H-NMR}_{400\text{MHz}}(\text{CDCl}_3:7.26 \text{ ppm})$ ]

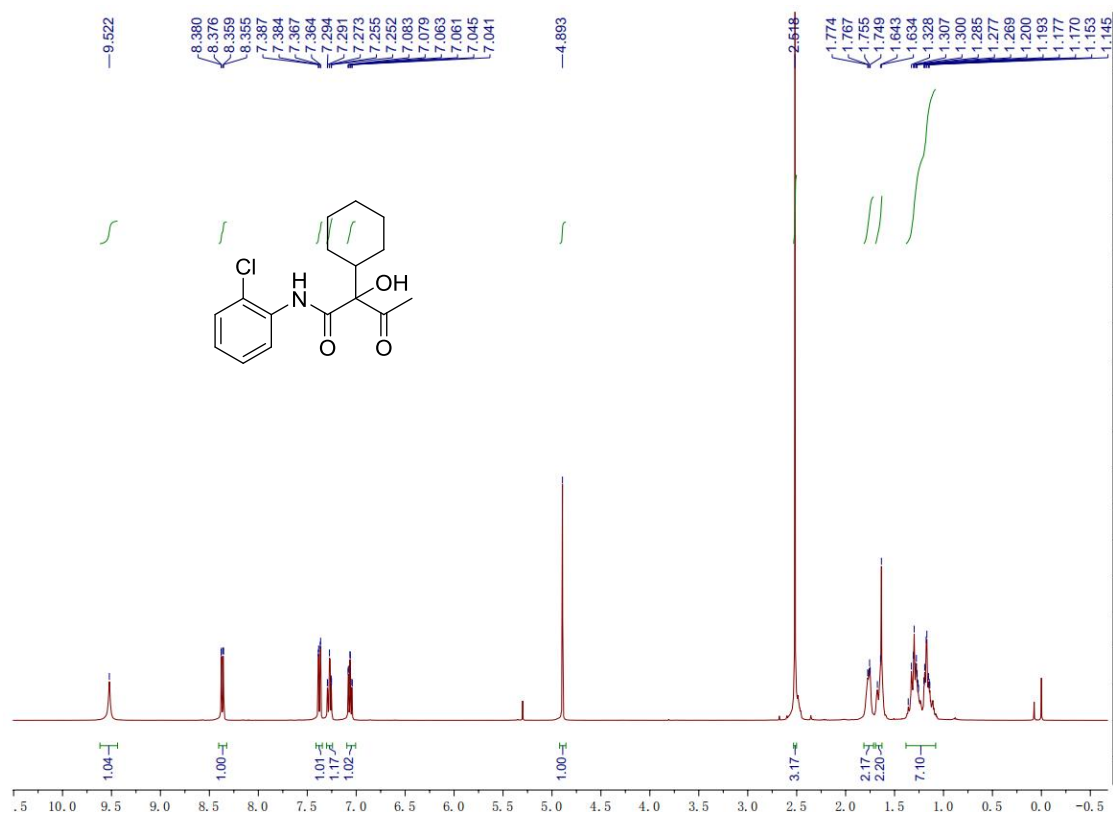

$^{13}\text{C-NMR}_{150\text{MHz}}(\text{CDCl}_3:77.00 \text{ ppm})$

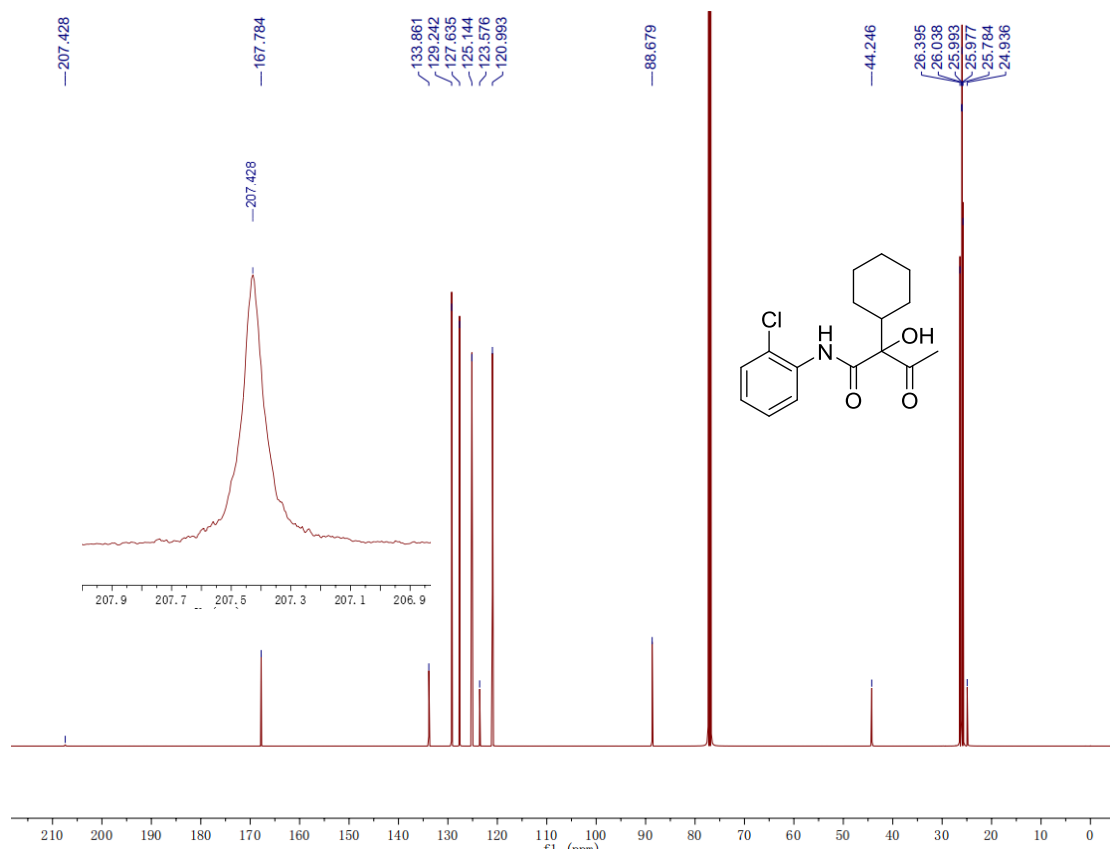

**2-Cyclohexyl-N-(2-fluorophenyl)-2-hydroxy-3-oxobutanamide** [ $^1\text{H\_NMR\_400MHz\_}(\text{CDCl}_3:7.26 \text{ ppm})$ ]

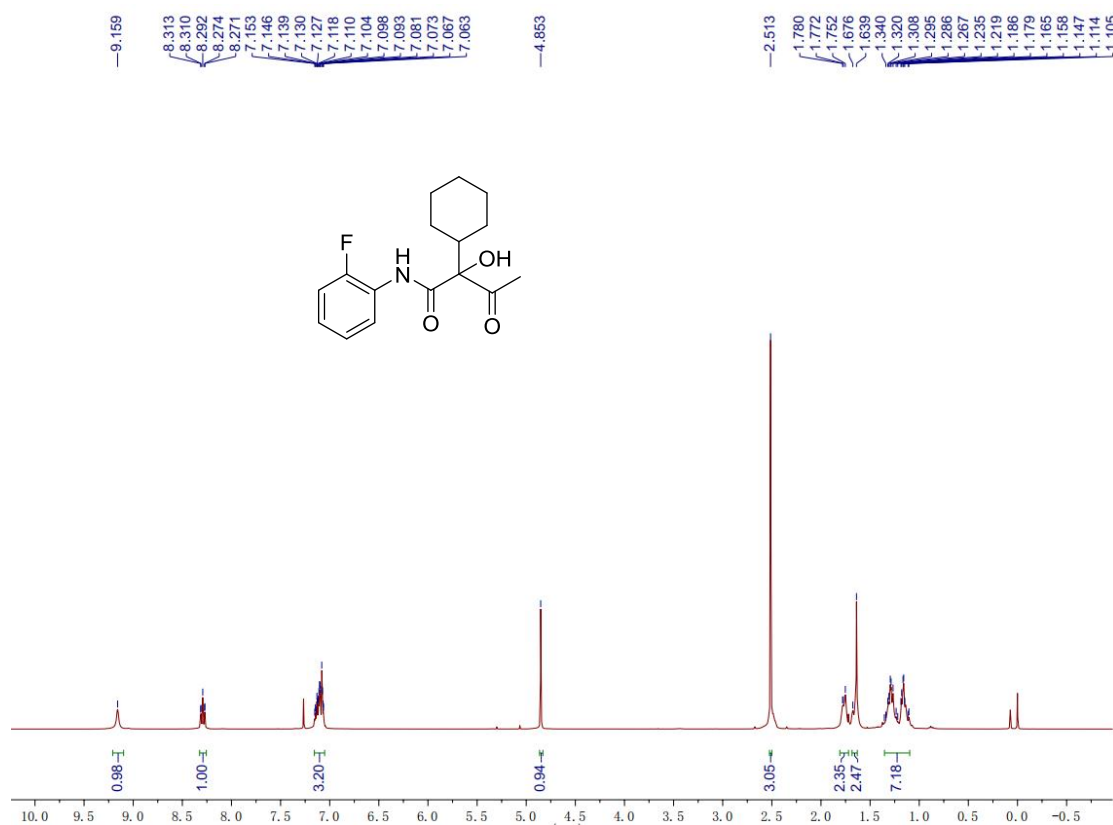

**[ $^{13}\text{C\_NMR\_150MHz\_}(\text{CDCl}_3:77.00 \text{ ppm})$ ]**

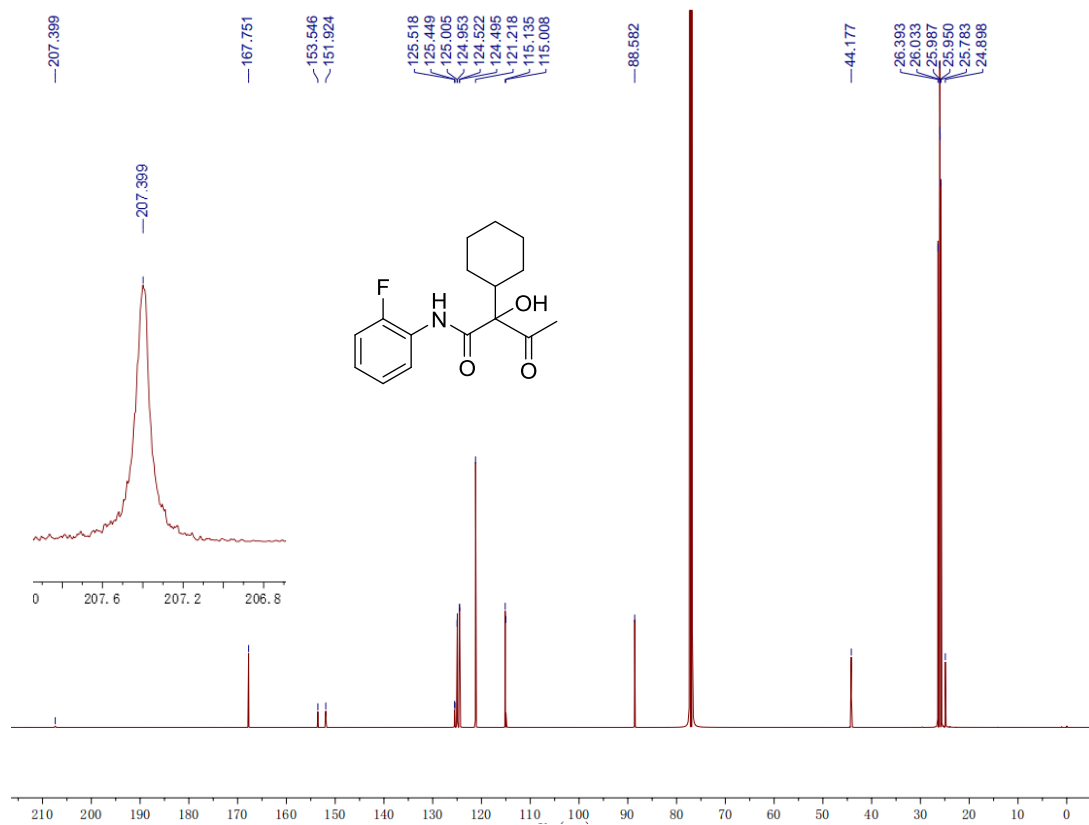

**2-Cyclohexyl-2-hydroxy-3-oxo-N-(o-tolyl)butanamide** [ $^1\text{H\_NMR\_400MHz\_}(\text{CDCl}_3:7.26 \text{ ppm})$ ]

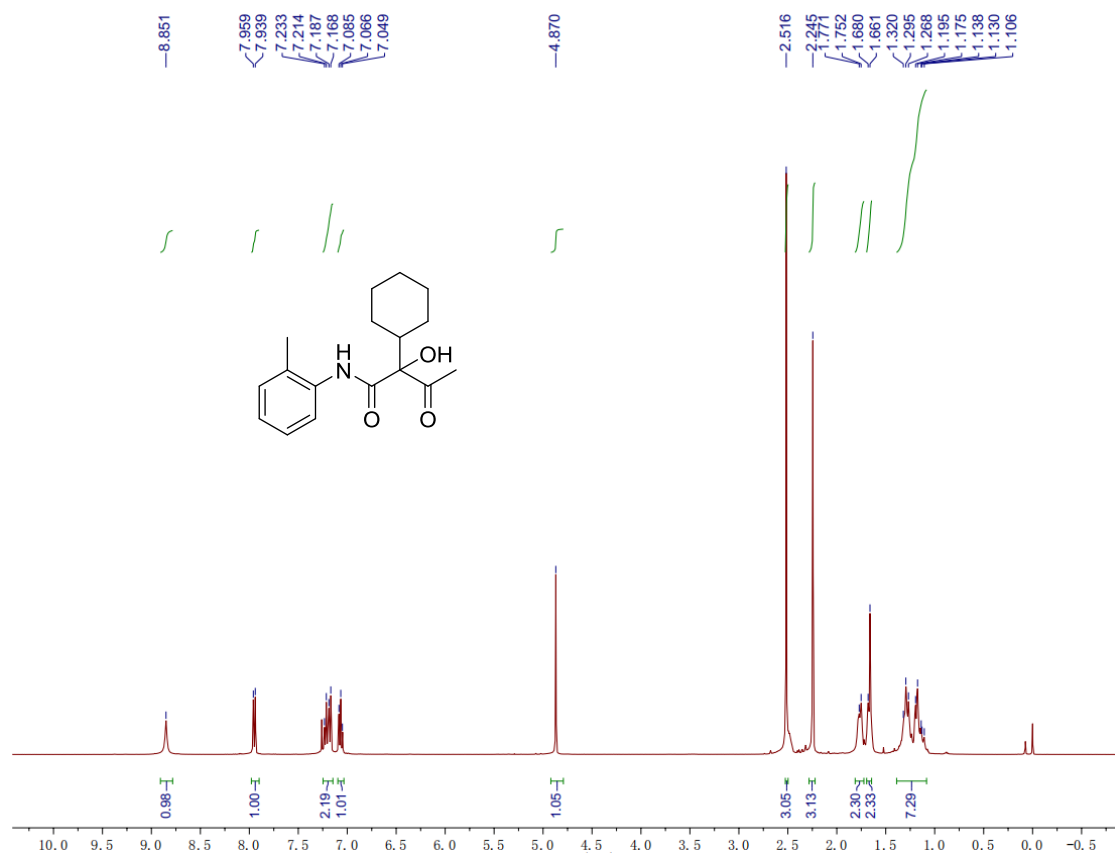

$^{13}\text{C\_NMR}$  150MHz ( $\text{CDCl}_3:77.00 \text{ ppm}$ )

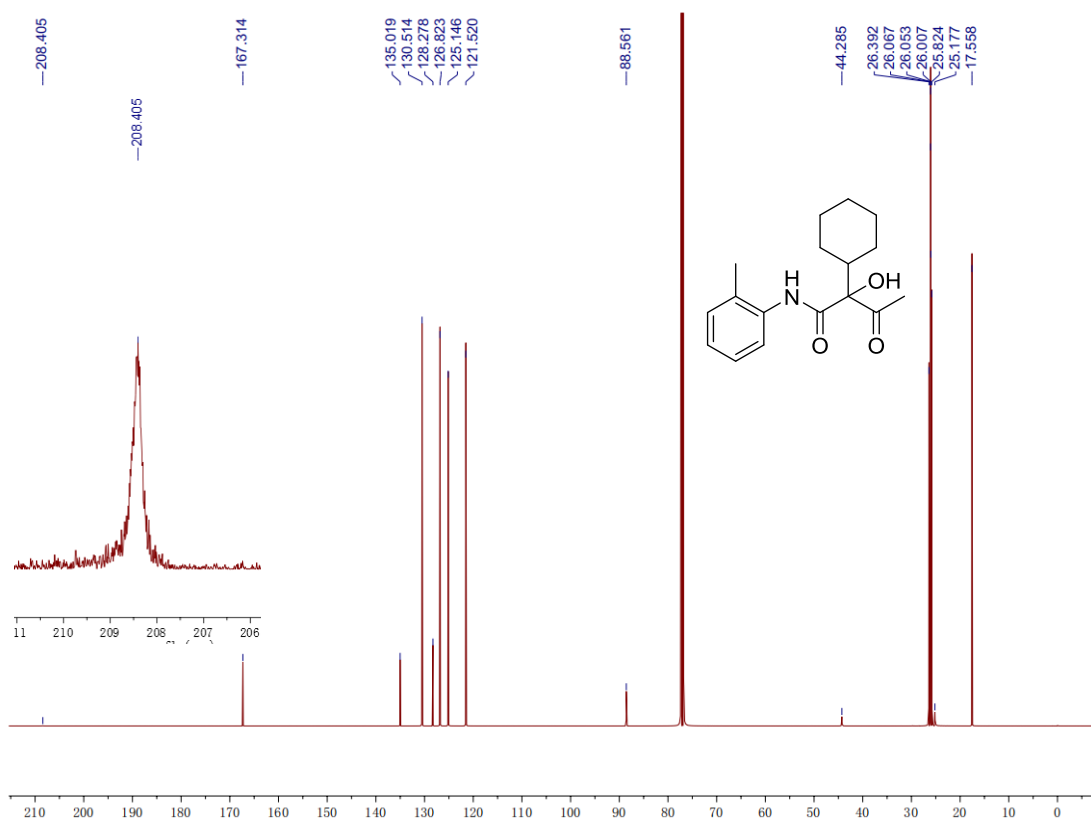

**2-Cyclohexyl-2-hydroxy-N-(2-methoxyphenyl)-3-oxobutanamide** [<sup>1</sup>H\_NMR\_400MHz\_(CDCl<sub>3</sub>:7.26 ppm)]

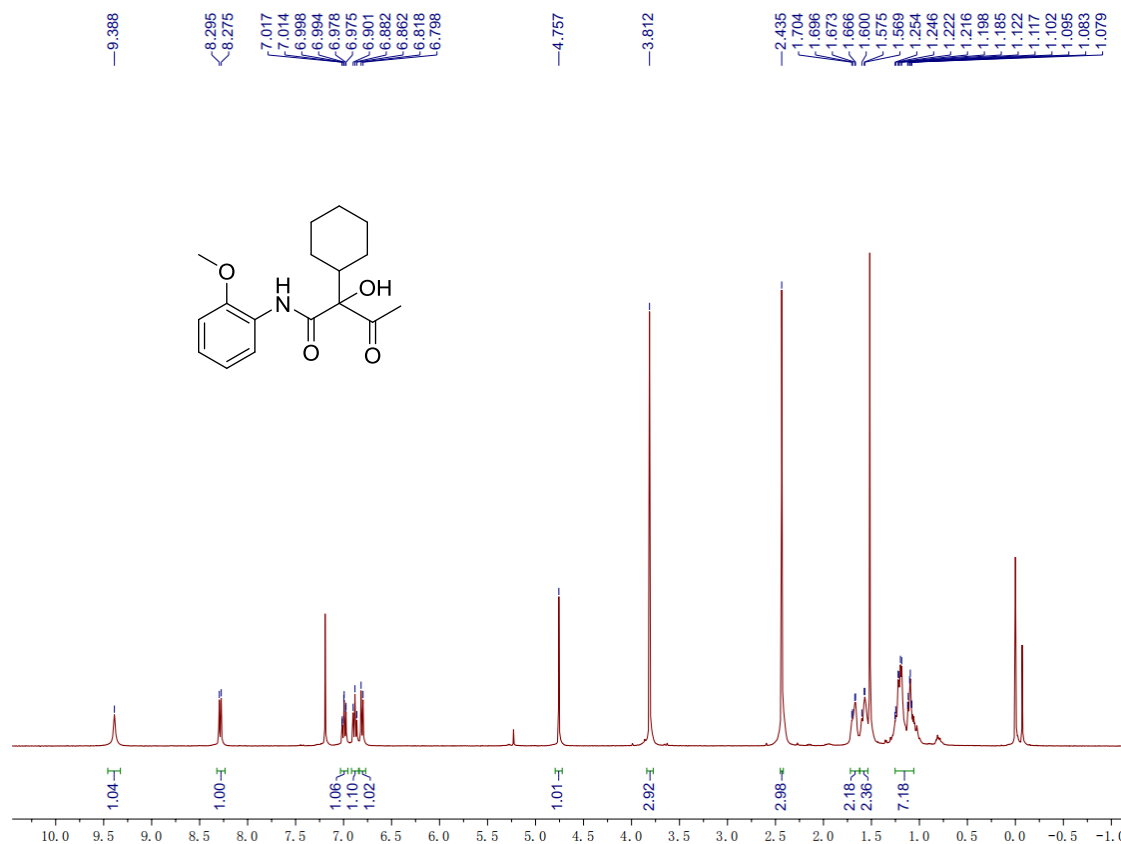

**[<sup>13</sup>C\_NMR\_150MHz\_(CDCl<sub>3</sub>:77.00 ppm)]**

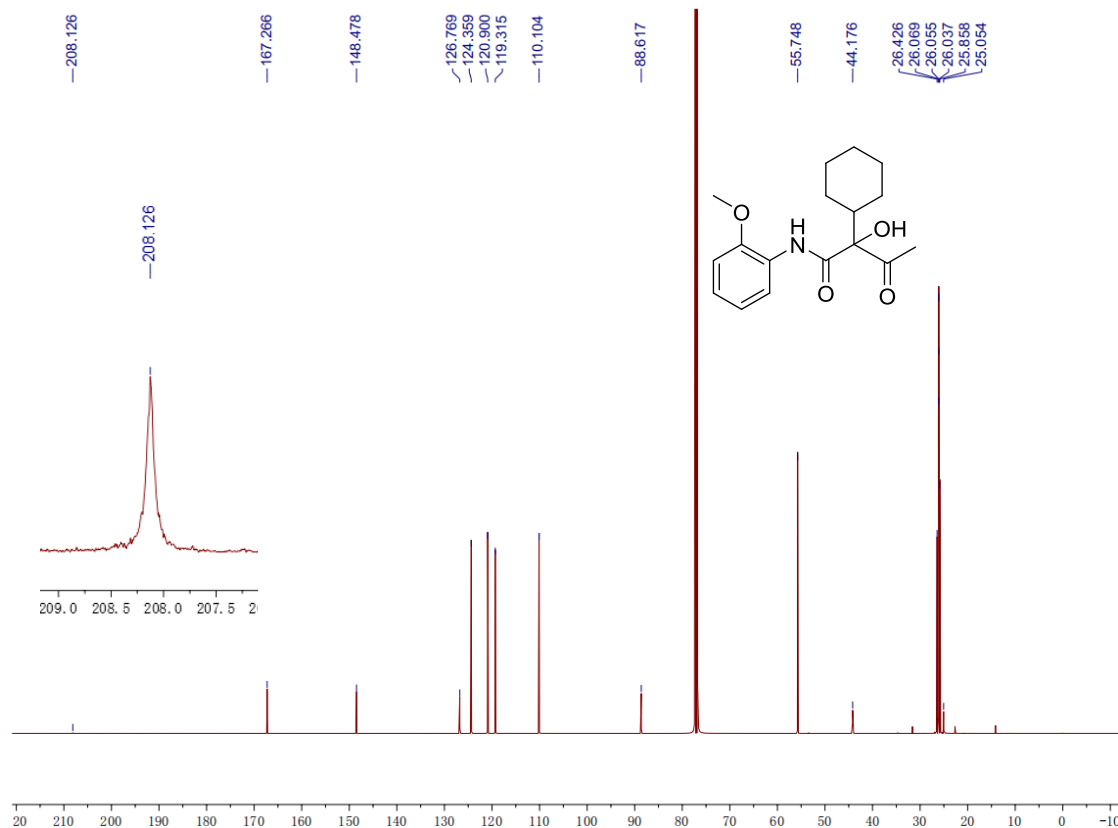



***N*-(4-Chloro-2-methylphenyl)-2-cyclohexyl-2-hydroxy-3-oxobutanamide** [<sup>1</sup>H\_NMR\_400MHz\_(CDCl<sub>3</sub>:7.26 ppm)]

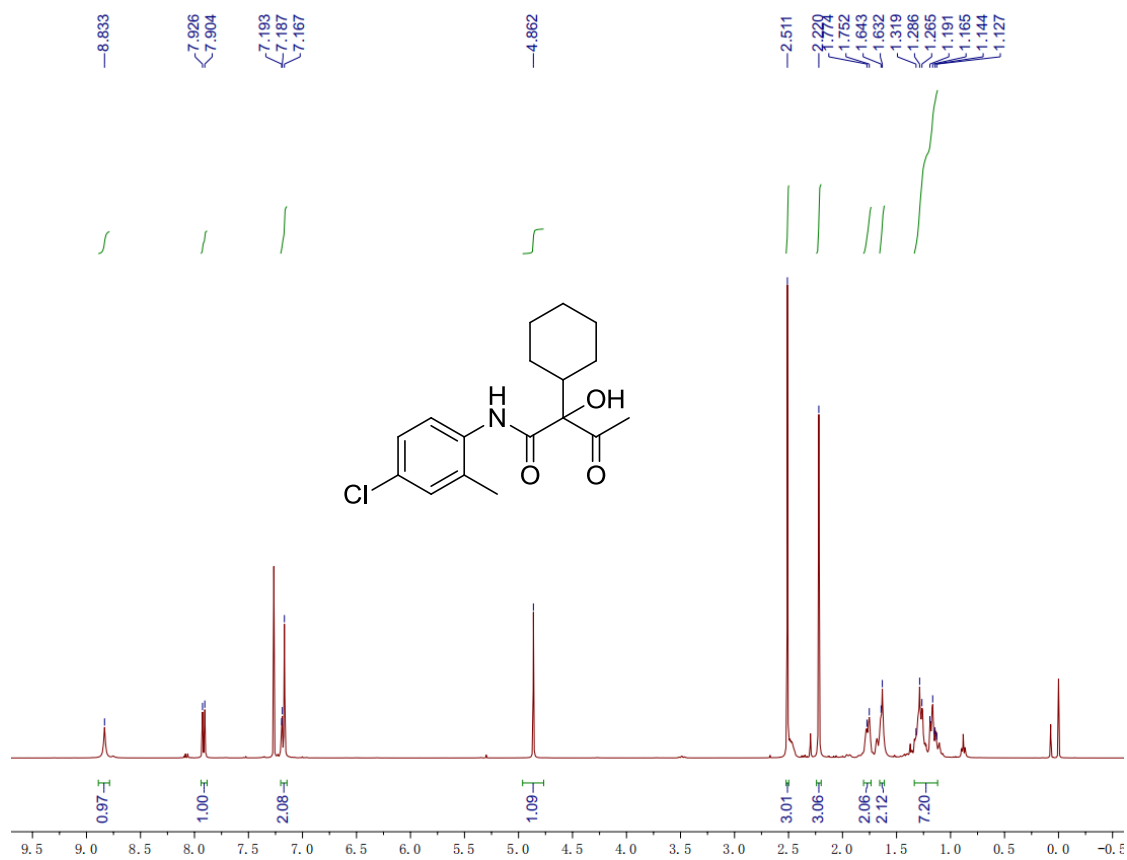

**[<sup>13</sup>C\_NMR\_150MHz\_(CDCl<sub>3</sub>:77.00 ppm)]**

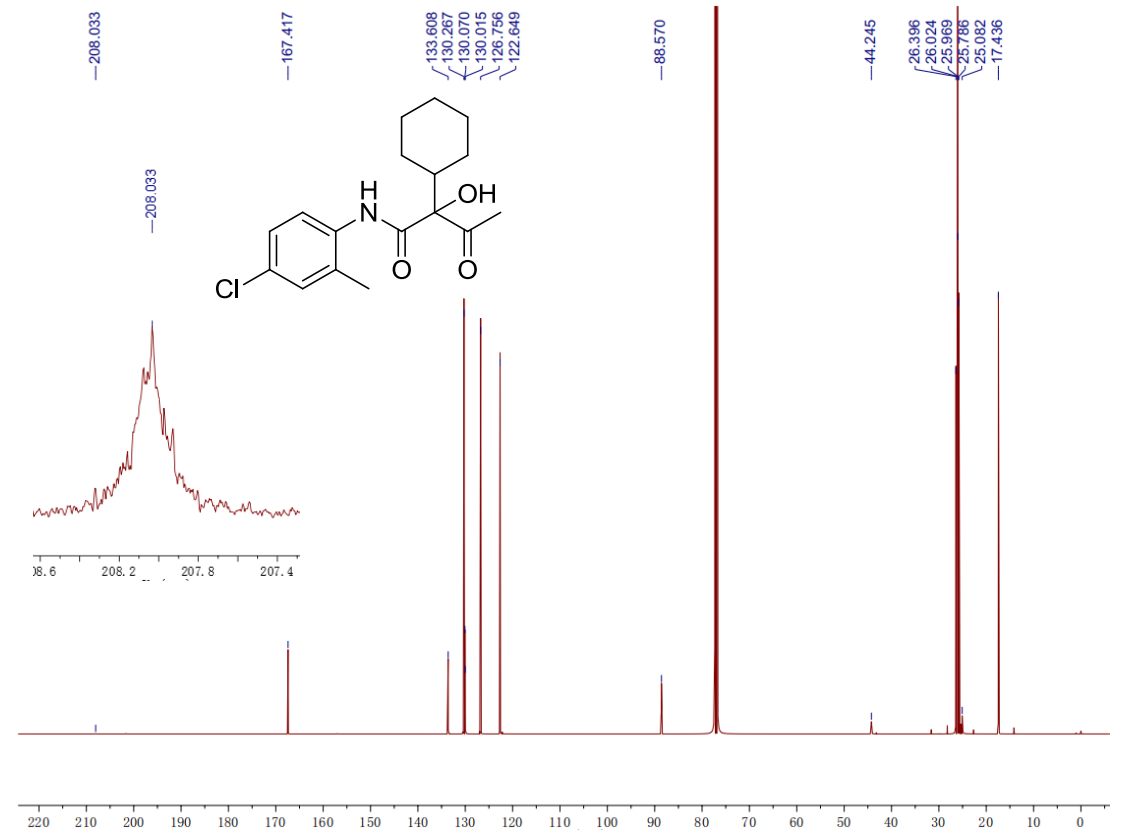

**2-Cyclohexyl-2-hydroxy-3-oxo-N-(pyridin-3-yl)butanamide** [ $^1\text{H\_NMR\_400MHz\_}(\text{CDCl}_3:7.26 \text{ ppm})$ ]

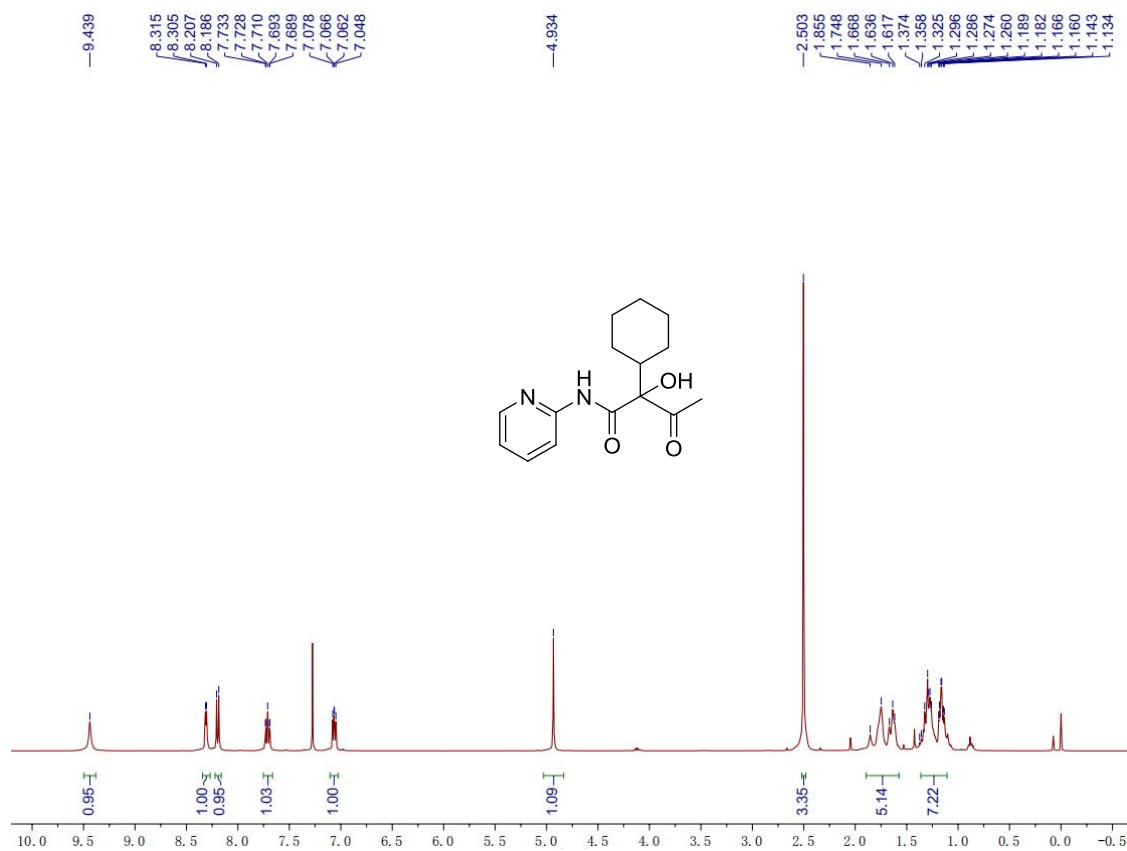

$^{13}\text{C\_NMR}$  150MHz ( $\text{CDCl}_3:77.00 \text{ ppm}$ )

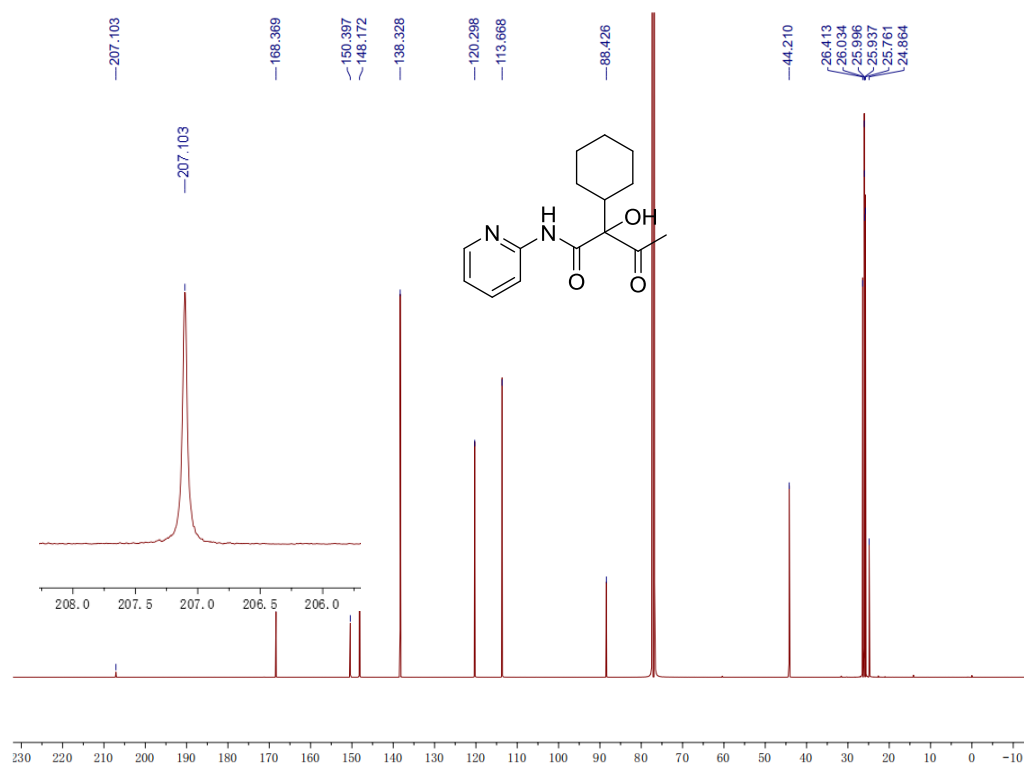

**2-Cyclohexyl-2-hydroxy-3-oxo-N-(quinolin-2-yl)butanamide** [<sup>1</sup>H\_NMR\_400MHz\_(CDCl<sub>3</sub>:7.26 ppm)]

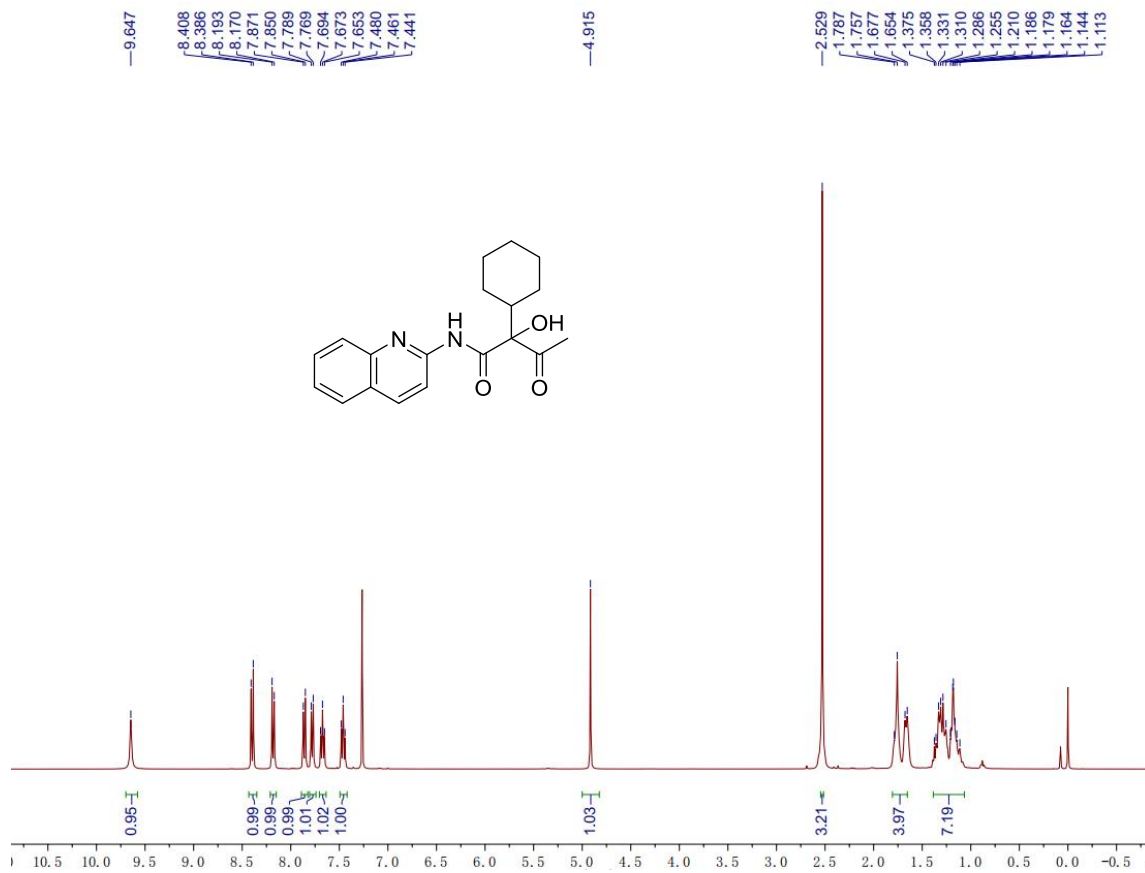

[<sup>13</sup>C\_NMR\_150MHz\_(CDCl<sub>3</sub>:77.00 ppm)]

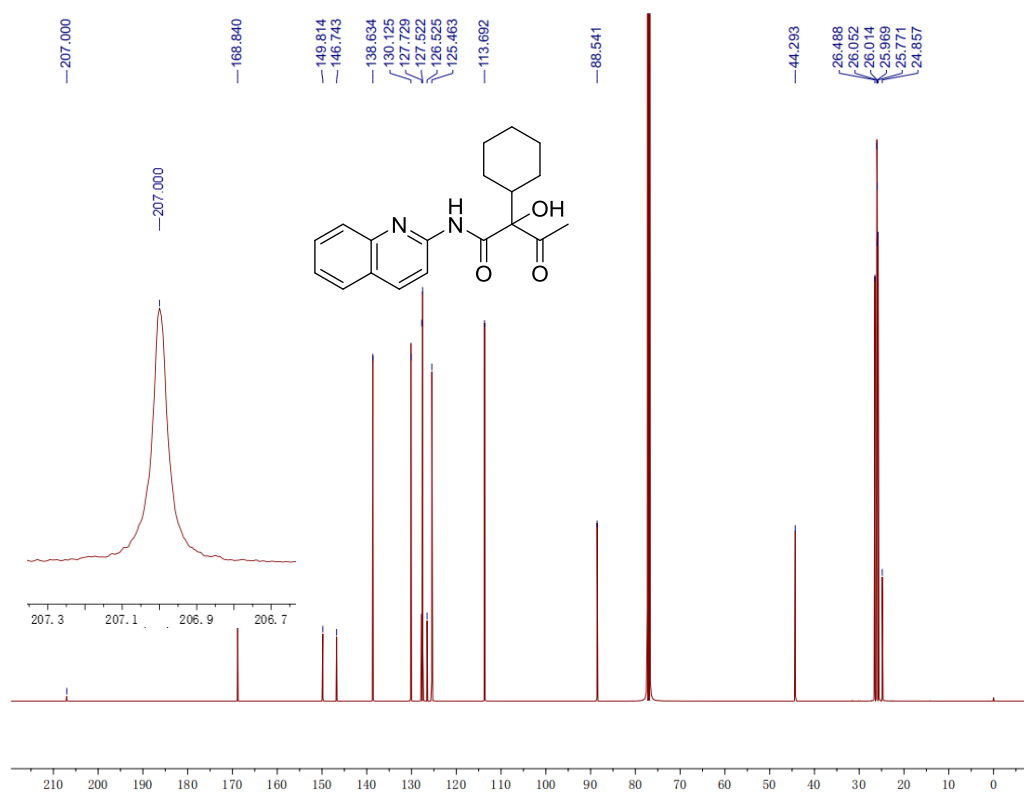

**2-Cyclohexyl-2-hydroxy-3-oxo-N-phenylpentanamide** [<sup>1</sup>H\_NMR\_400MHz\_(CDCl<sub>3</sub>:7.26 ppm)]

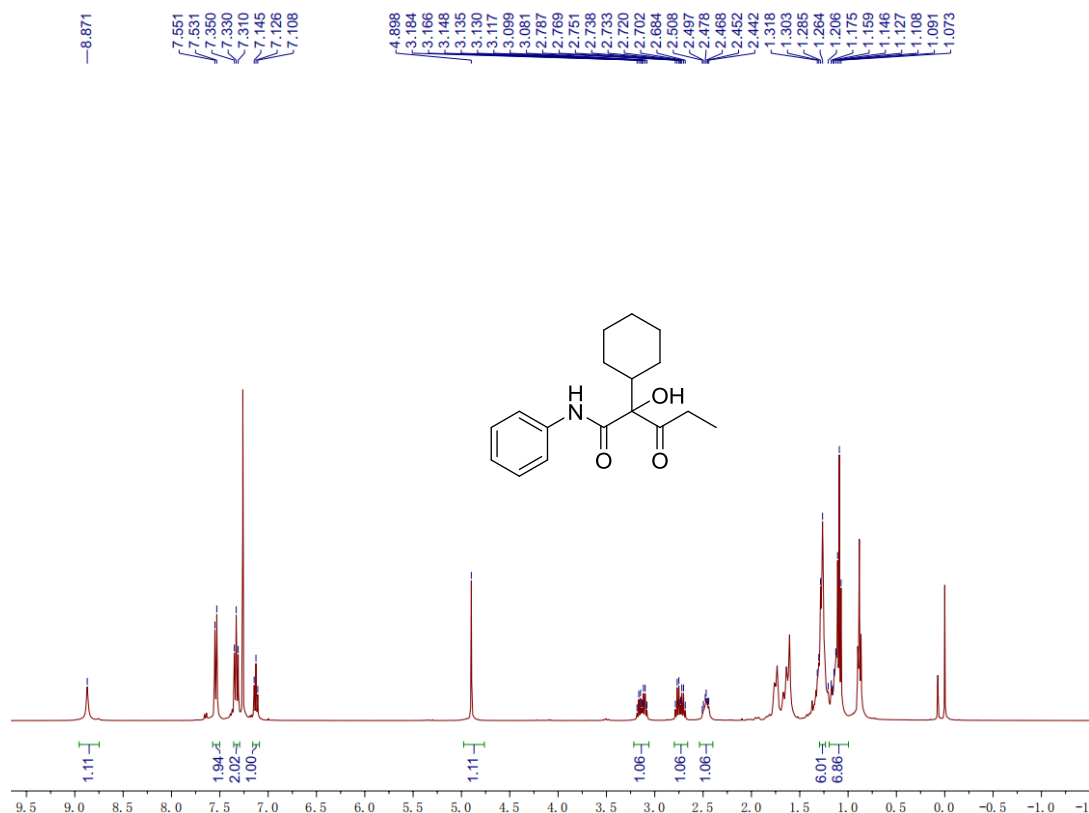

[<sup>13</sup>C\_NMR\_150MHz\_(CDCl<sub>3</sub>:77.00 ppm)]

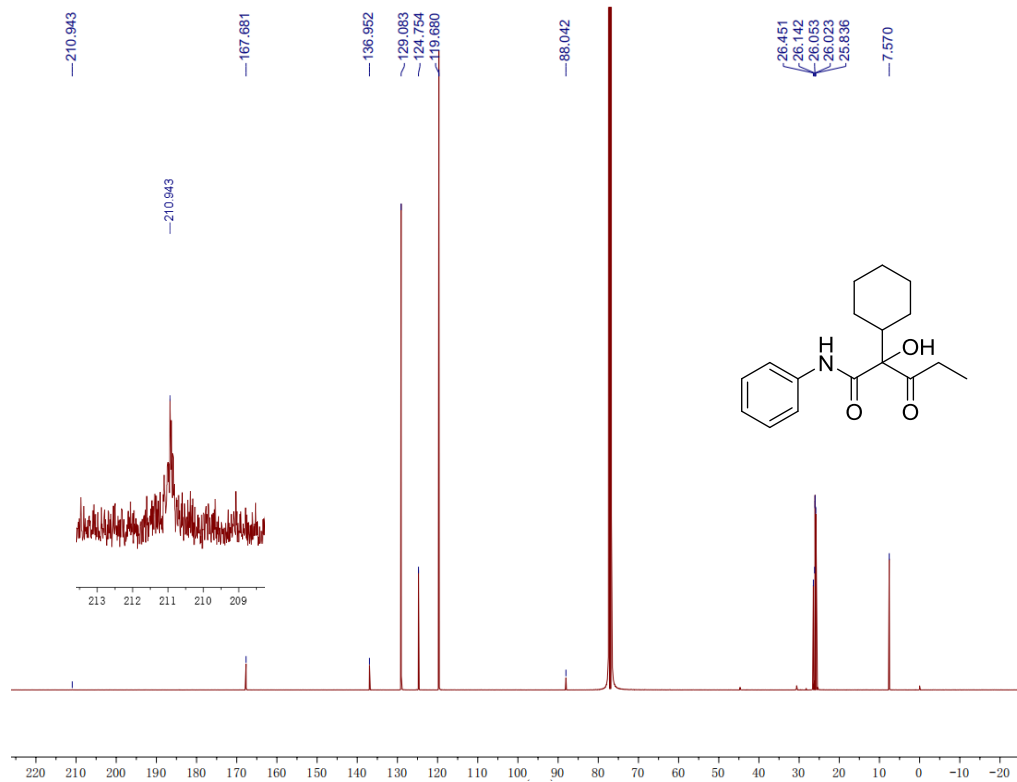

**2-Cyclohexyl-2-hydroxy-3-oxo-N-phenylhexanamide** [ $^1\text{H\_NMR\_400MHz\_}(\text{CDCl}_3:7.26 \text{ ppm})$ ]

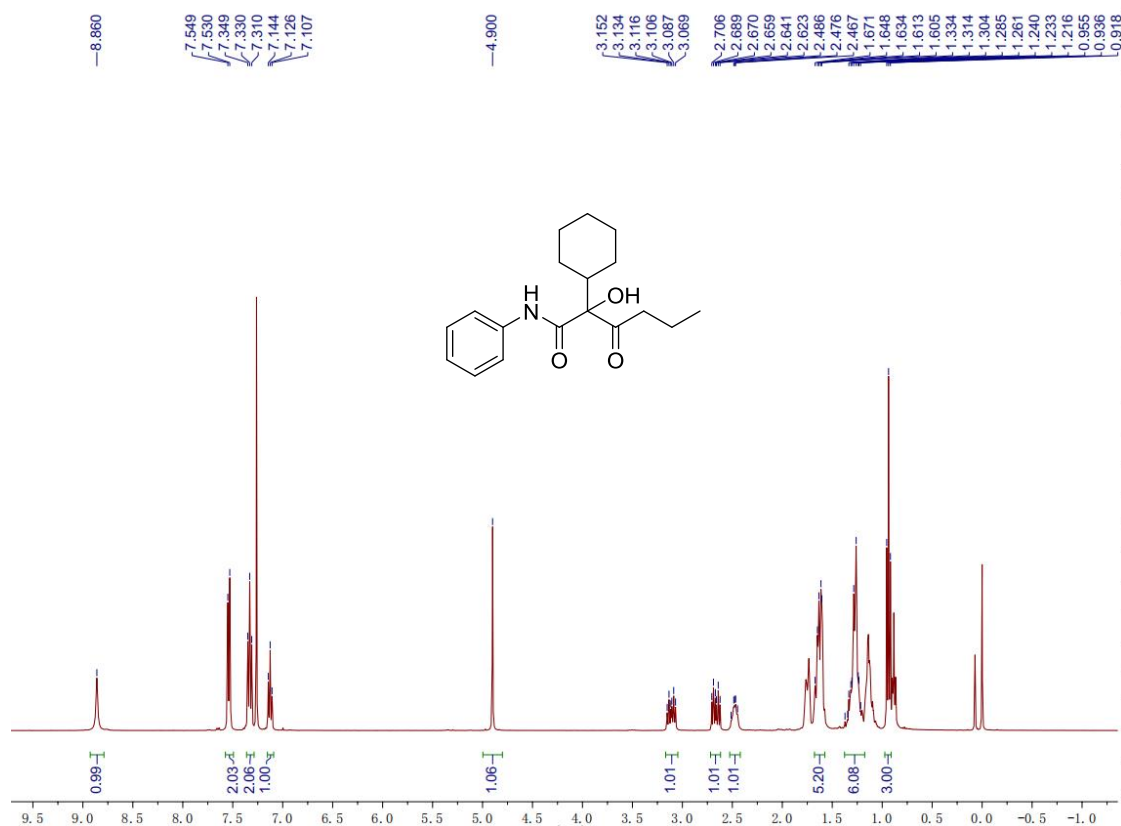

**[ $^{13}\text{C\_NMR\_150MHz\_}(\text{CDCl}_3:77.00 \text{ ppm})$ ]**

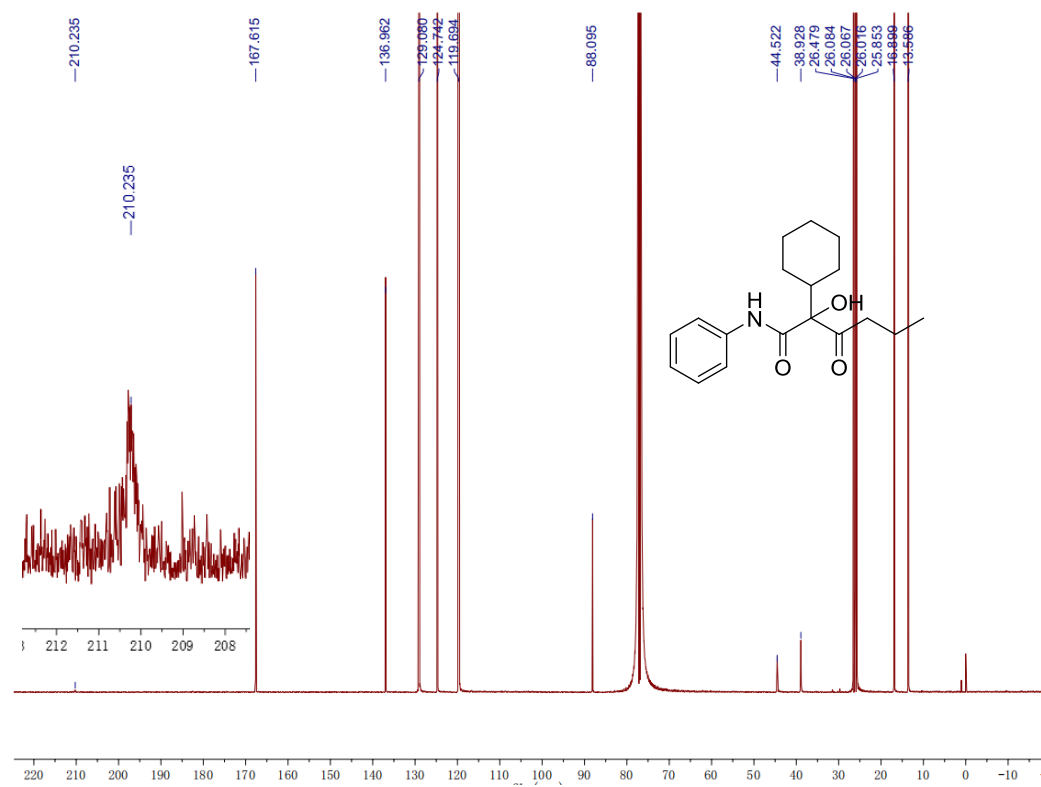

**2-Hydroxy-N-phenylpropanamide** [ $^1\text{H\_NMR\_400MHz\_}(\text{CDCl}_3:7.26 \text{ ppm})$ ]

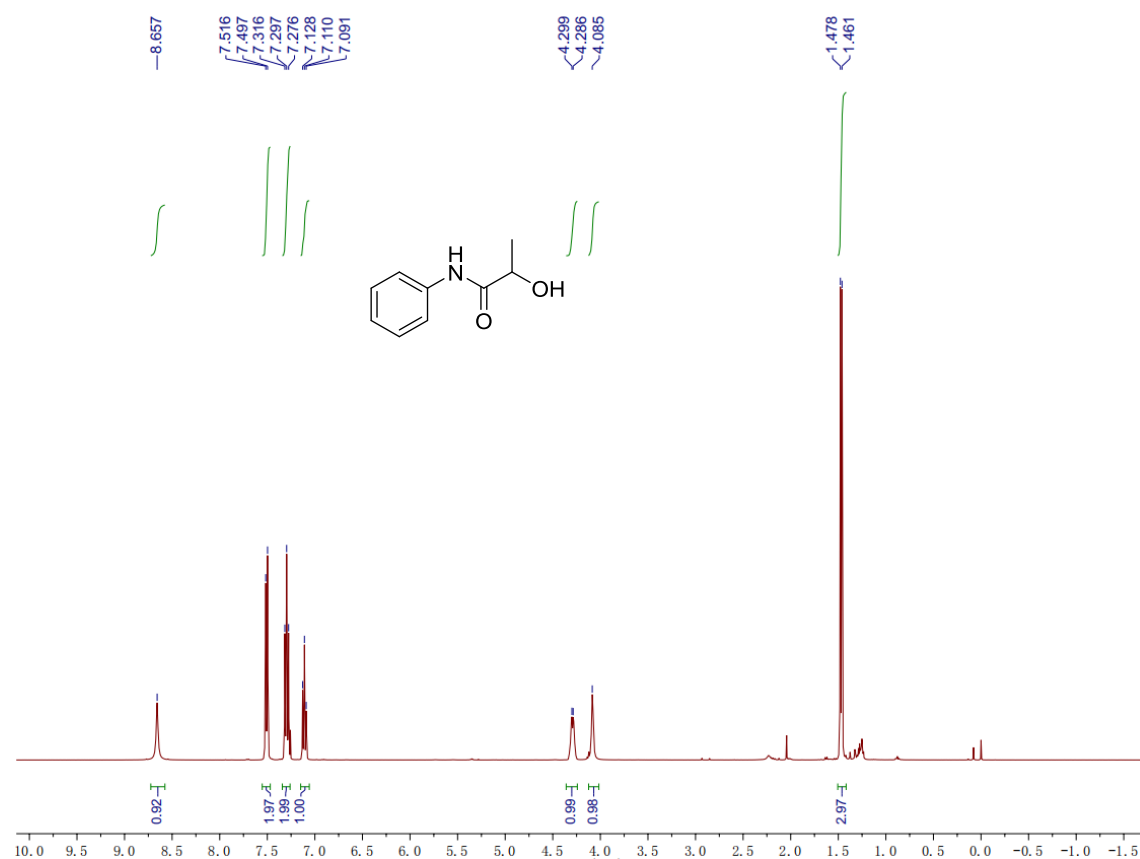

$^{13}\text{C\_NMR\_100MHz\_}(\text{CDCl}_3:77.00 \text{ ppm})$

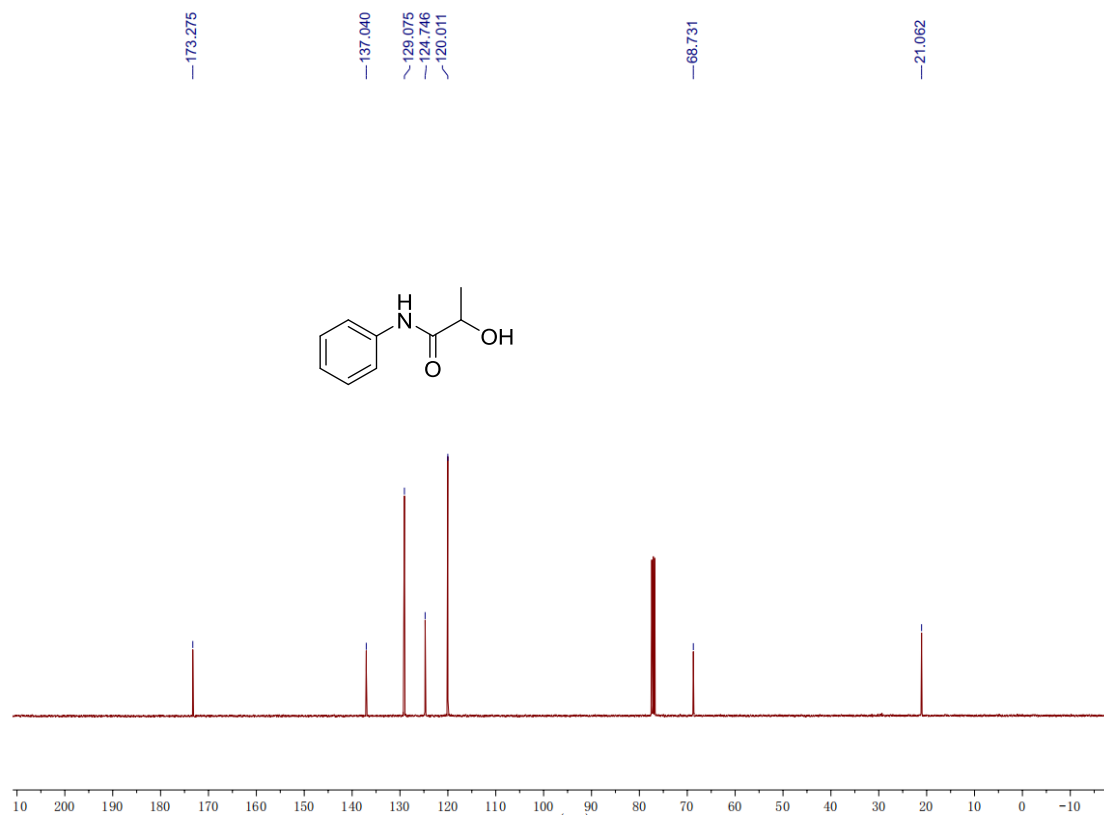

***N*-(4-Chlorophenyl)-2-hydroxypropanamide** [ $^1\text{H-NMR}$ \_400MHz\_( $\text{CDCl}_3$ :7.26 ppm)]

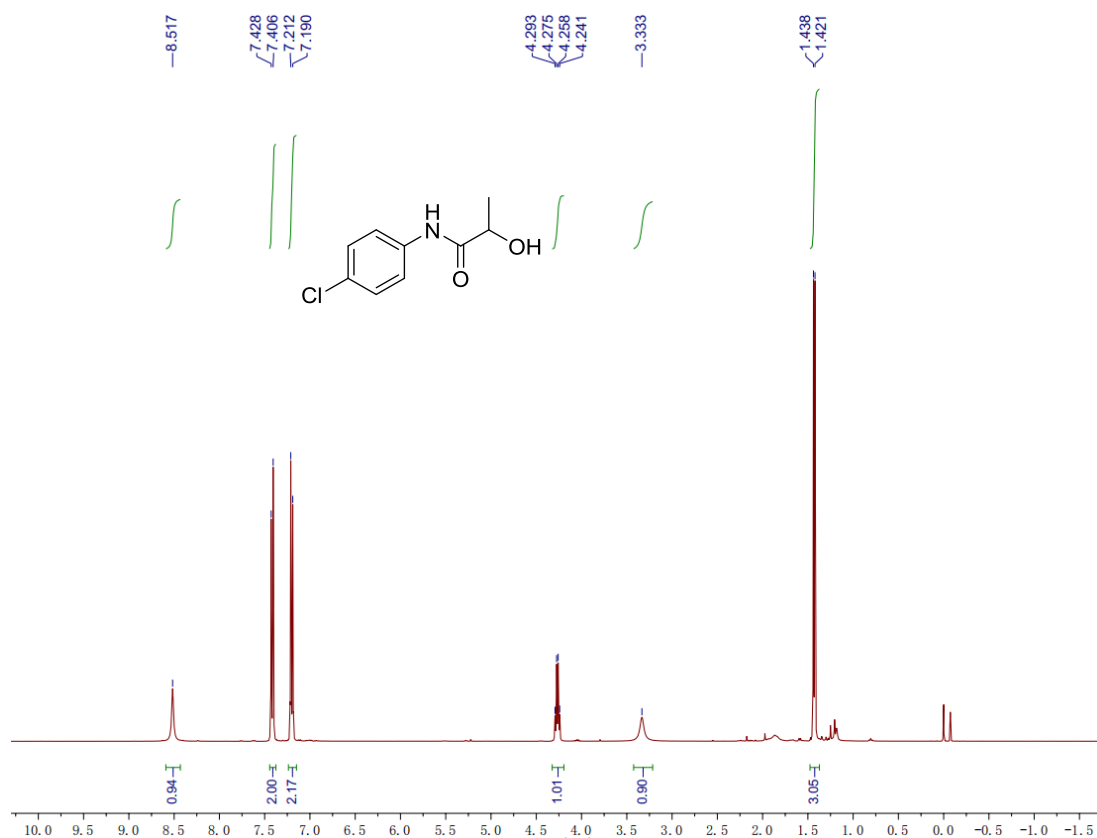

***N*-(4-Chlorophenyl)-2-hydroxypropanamide** [ $^{13}\text{C-NMR}$ \_100MHz\_( $\text{CDCl}_3$ :77.00 ppm)]

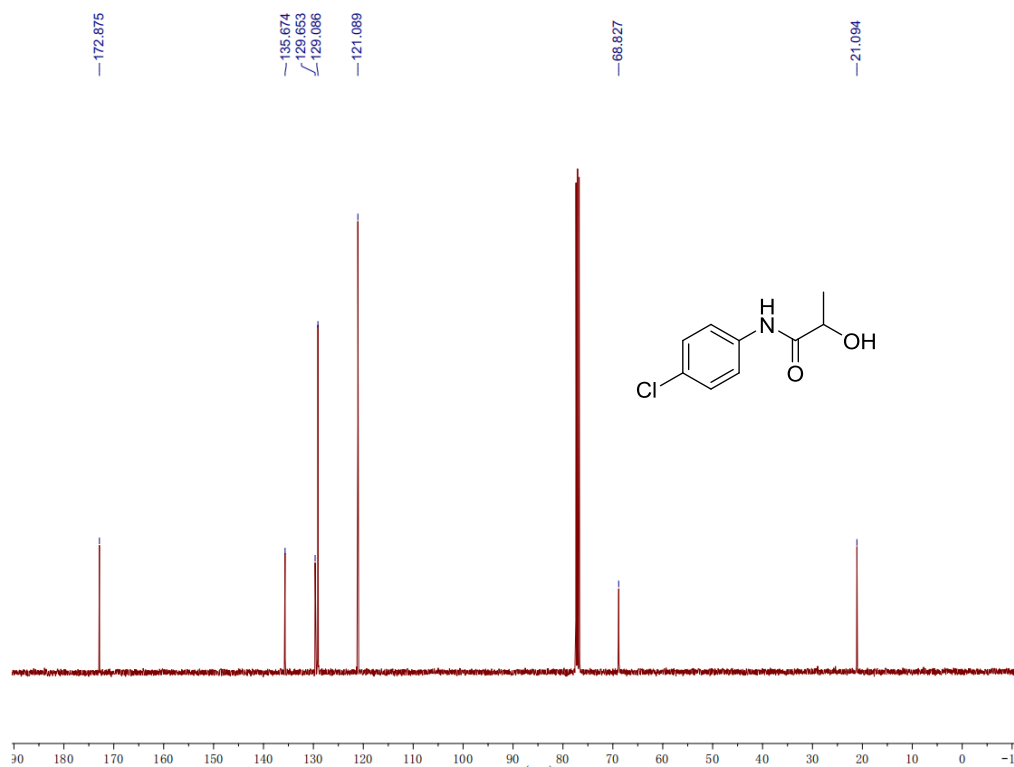

***N*-(4-Fluorophenyl)-2-hydroxypropanamide** [<sup>1</sup>H\_NMR\_400MHz\_(CDCl<sub>3</sub>:7.26 ppm)]

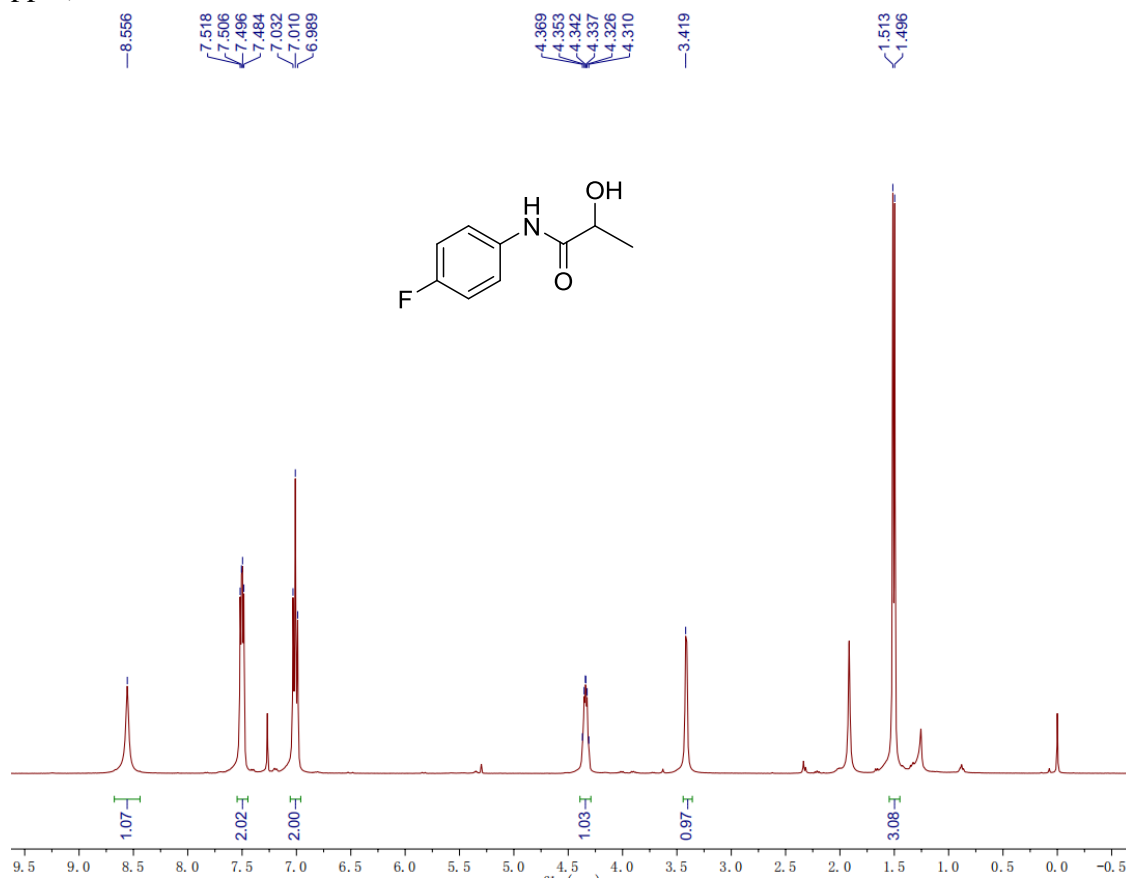

[<sup>13</sup>C\_NMR\_150MHz\_(CDCl<sub>3</sub>:77.00 ppm)]

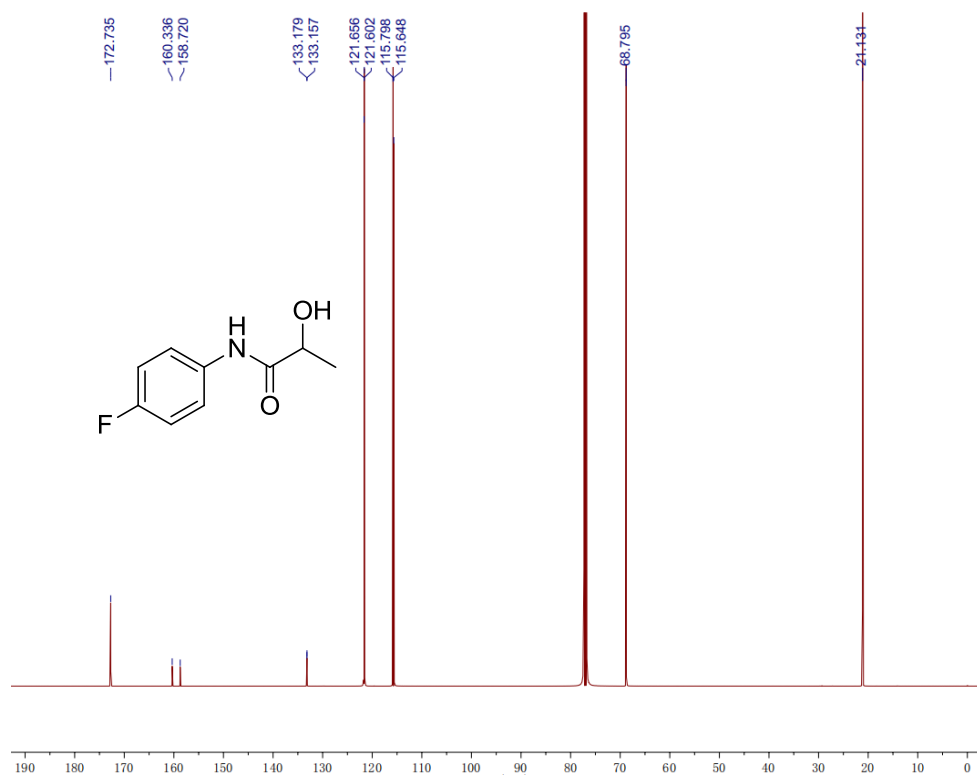



**2-Hydroxy-N-(p-tolyl)propanamide** [ $^1\text{H\_NMR\_400MHz\_}(\text{CDCl}_3:7.26 \text{ ppm})$ ]

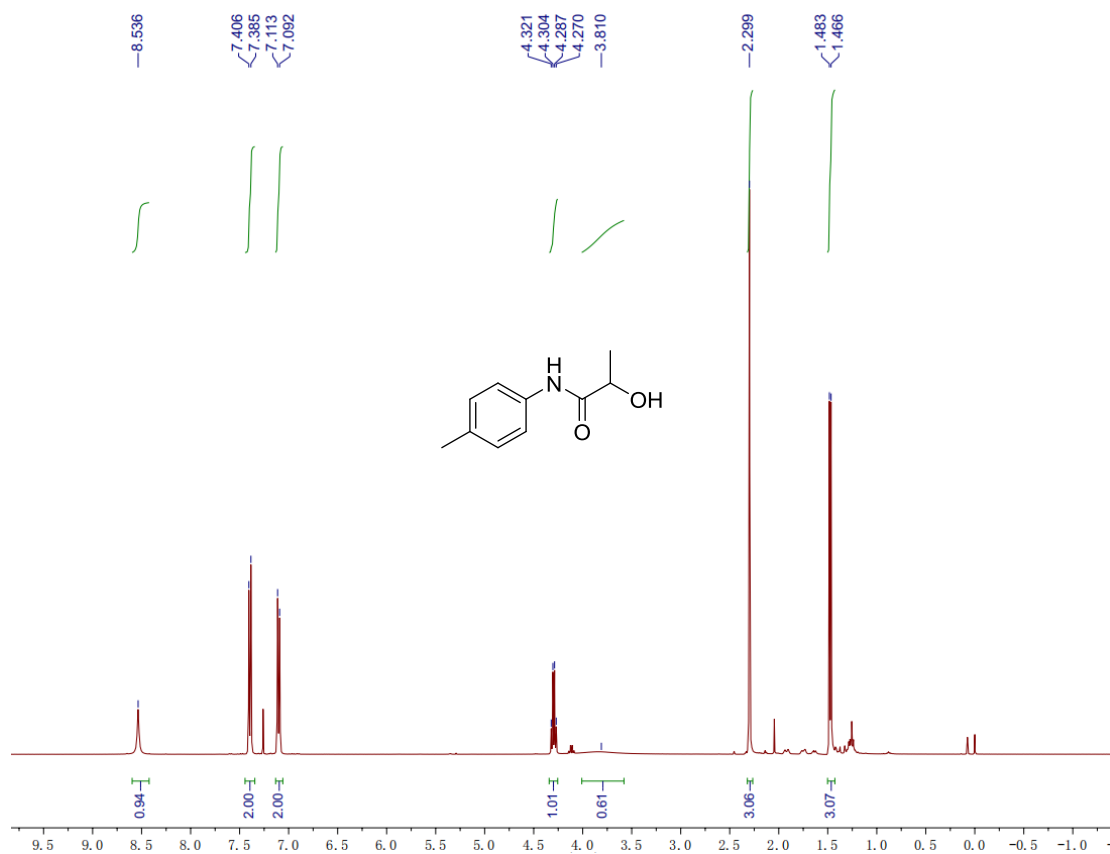

$^{13}\text{C\_NMR}$  100MHz ( $\text{CDCl}_3:77.00 \text{ ppm}$ )

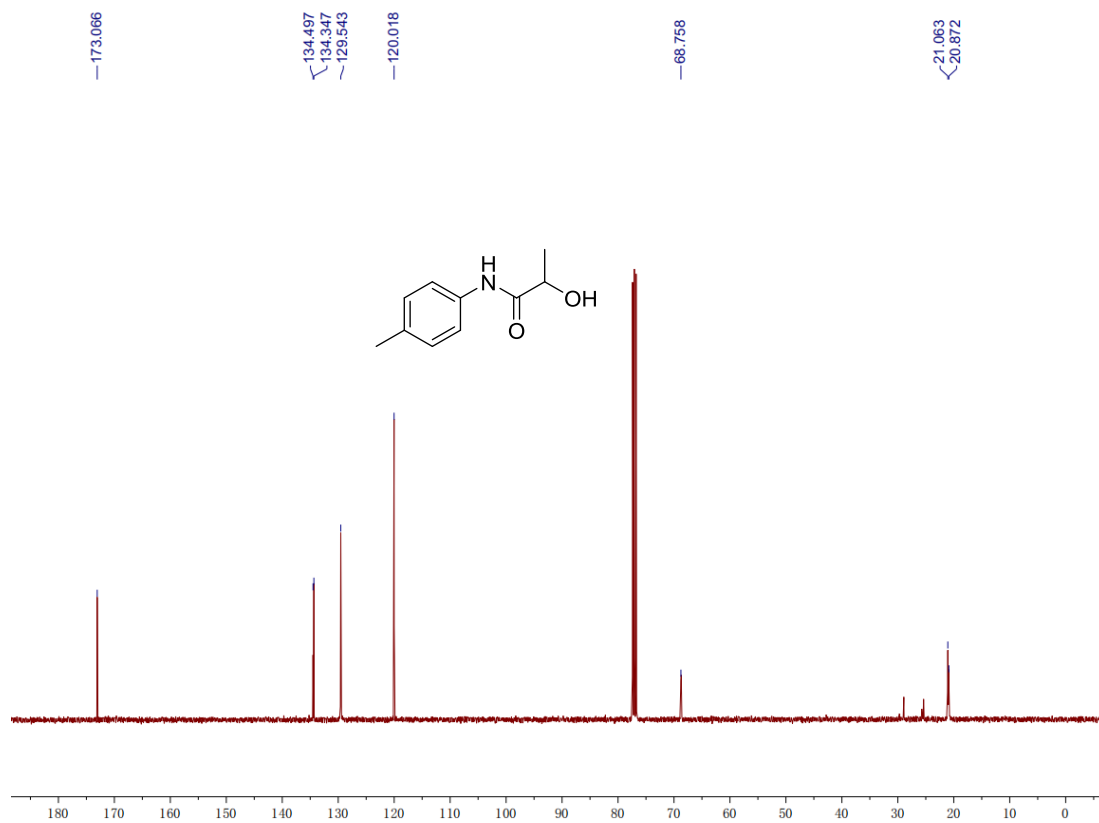

***N*-(4-(*tert*-Butyl)phenyl)-2-hydroxypropanamide** [<sup>1</sup>H\_NMR\_400MHz\_(CDCl<sub>3</sub>:7.26 ppm)]

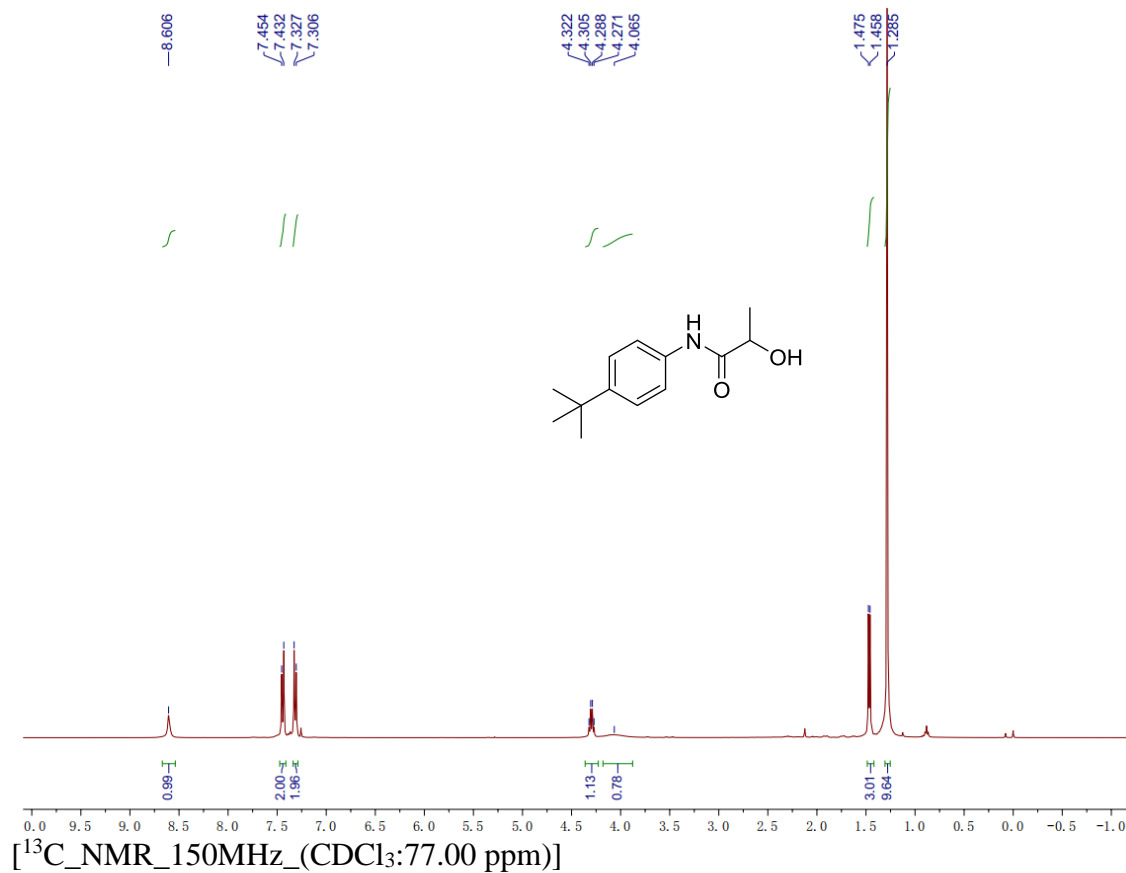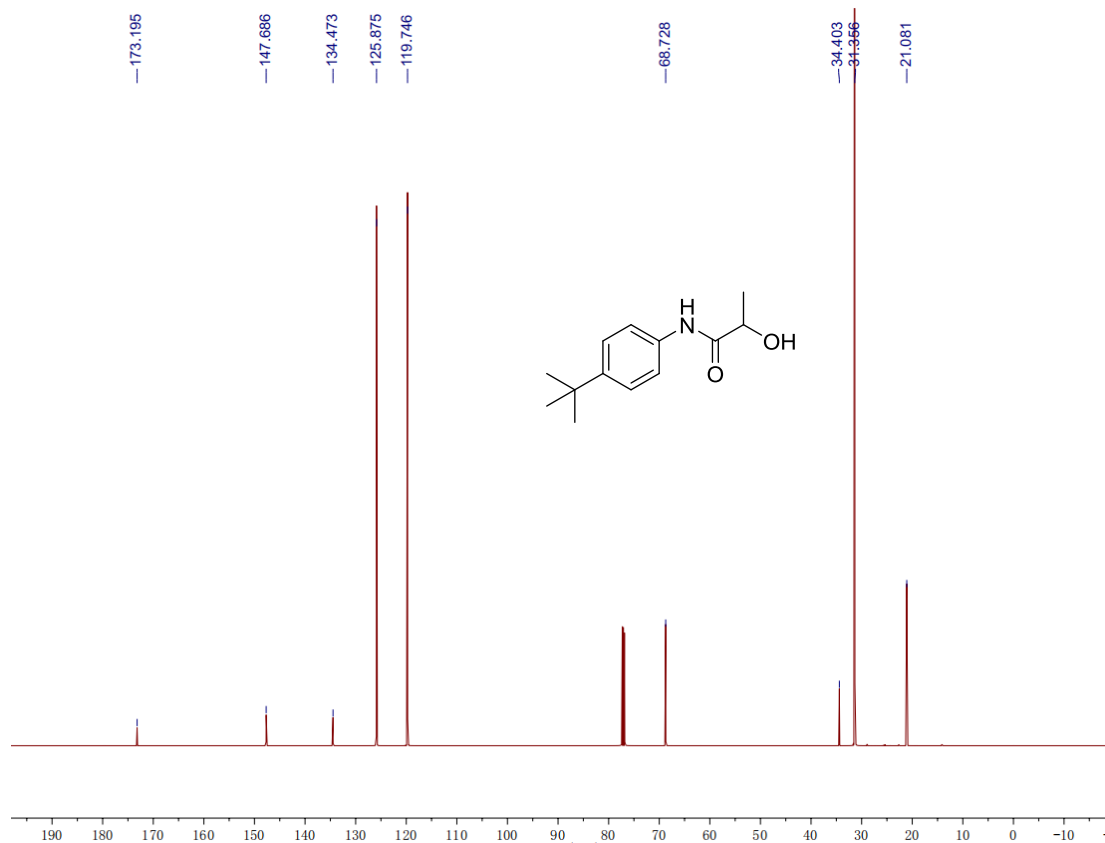

**2-Hydroxy-N-(4-methoxyphenyl)propanamide** [<sup>1</sup>H\_NMR\_400MHz\_(CDCl<sub>3</sub>:7.26 ppm)]

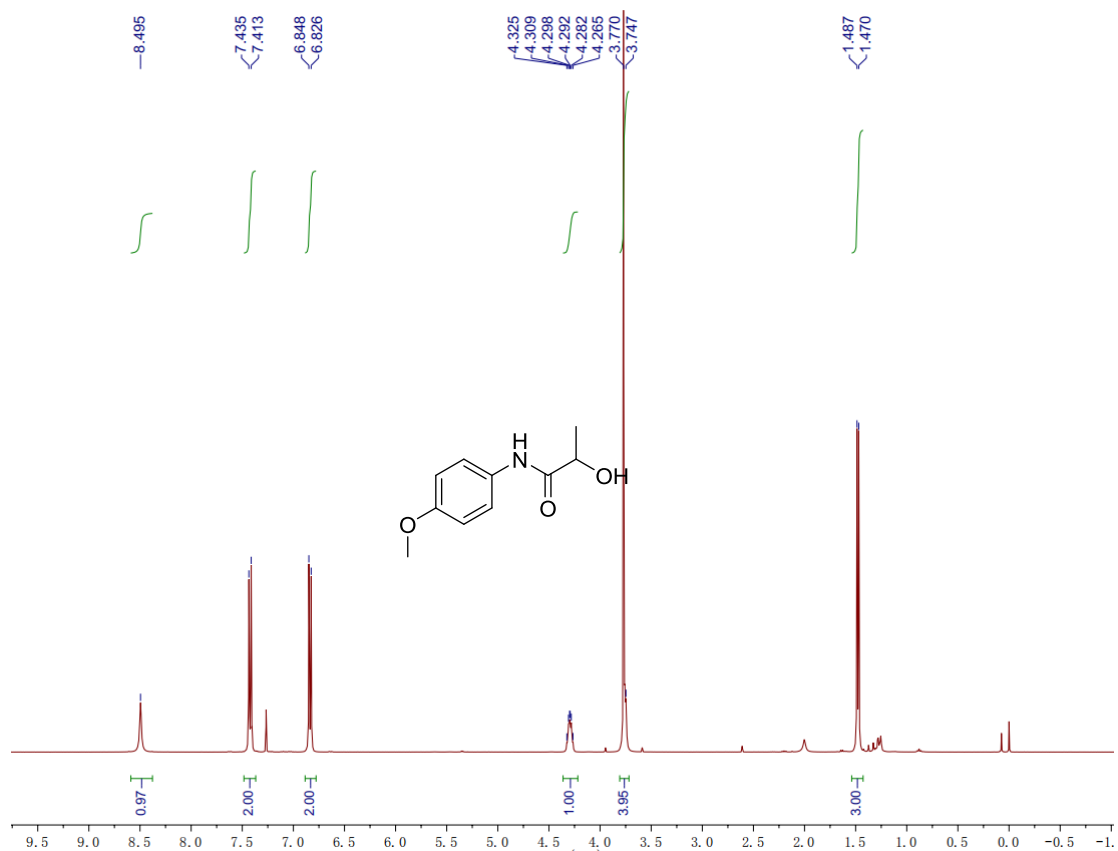

**[<sup>13</sup>C\_NMR\_100MHz\_(CDCl<sub>3</sub>:77.00 ppm)]**

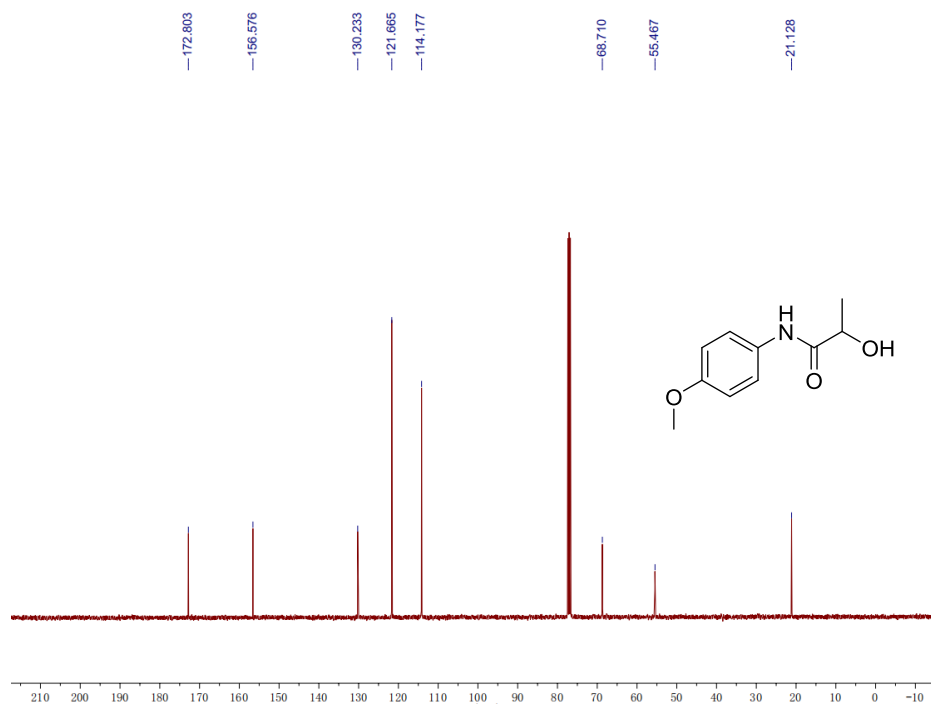

***N*-(4-Ethoxyphenyl)-2-hydroxypropanamide** [ $^1\text{H\_NMR\_400MHz\_}(\text{CDCl}_3:7.26$   
ppm)]

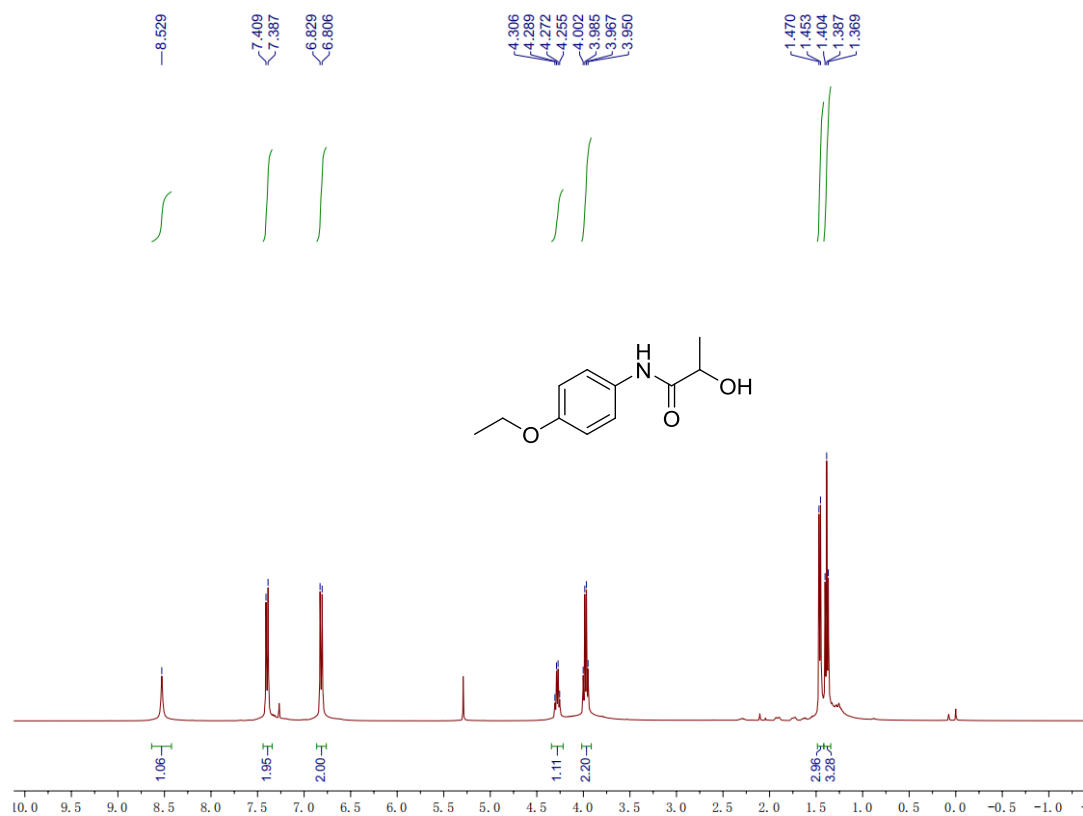

**[ $^{13}\text{C\_NMR\_150MHz\_}(\text{CDCl}_3:77.00$  ppm)]**

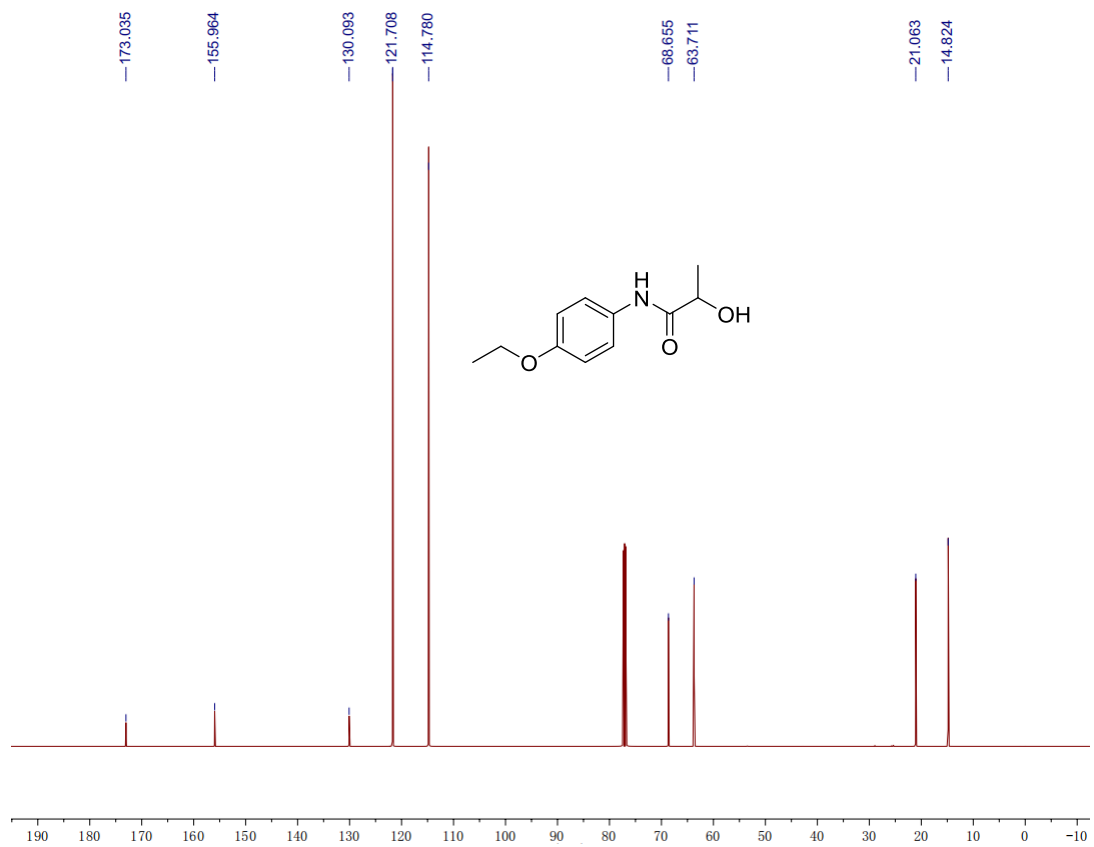

***N*-(3-Chlorophenyl)-2-hydroxypropanamide** [ $^1\text{H-NMR}$ \_400MHz\_( $\text{CDCl}_3$ :7.26 ppm)]

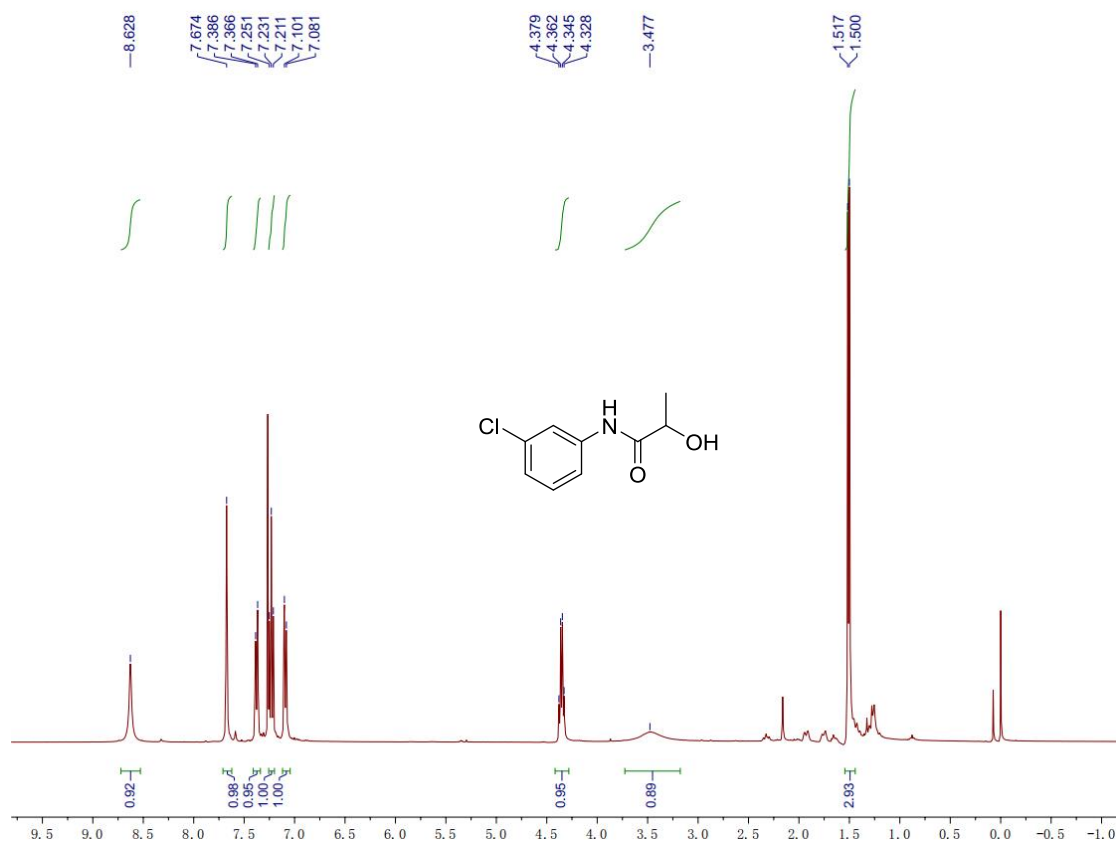

***N*-(3-Chlorophenyl)-2-hydroxypropanamide** [ $^{13}\text{C-NMR}$ \_150MHz\_( $\text{CDCl}_3$ :77.00 ppm)]

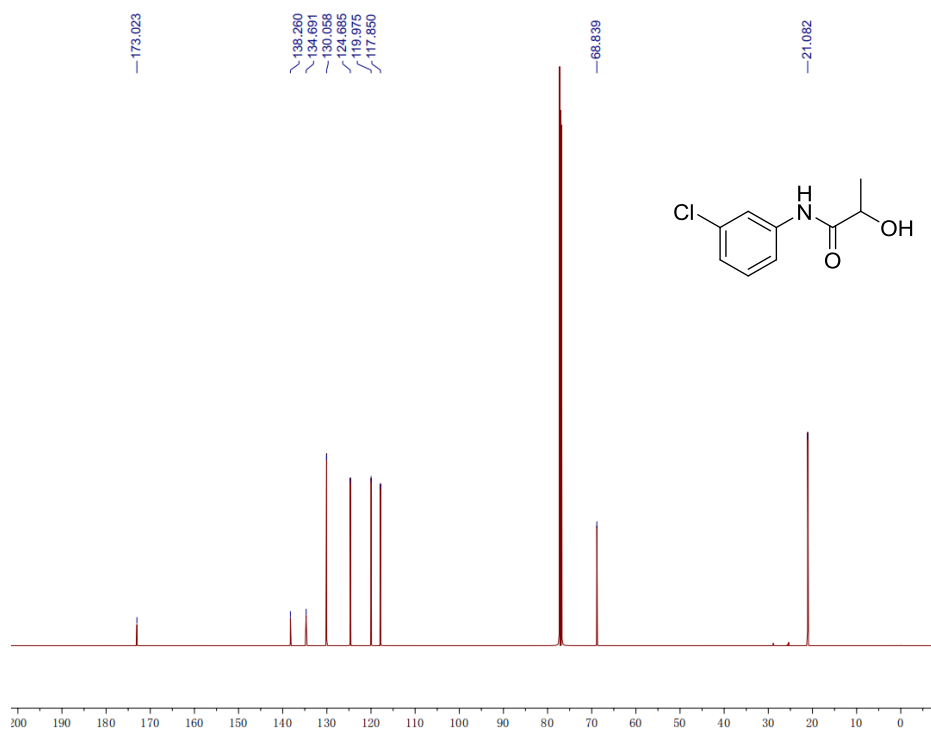

**2-Hydroxy-N-(m-tolyl)propanamide** [ $^1\text{H\_NMR\_600MHz\_}(\text{CDCl}_3:7.26 \text{ ppm})$ ]

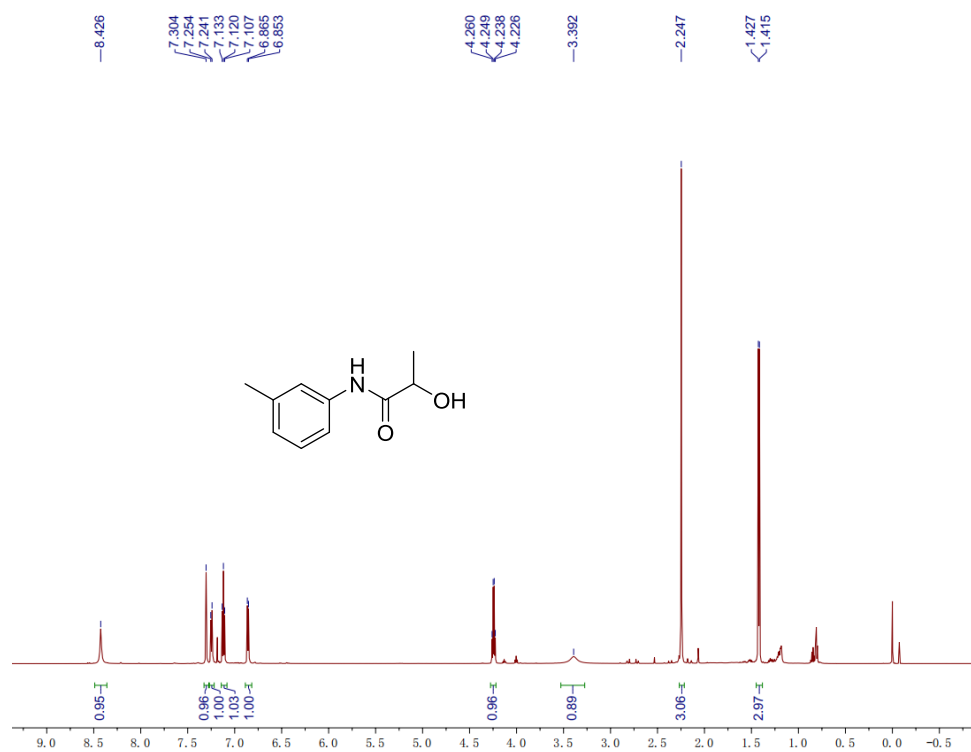

$^{13}\text{C\_NMR}$  150MHz ( $\text{CDCl}_3:77.00 \text{ ppm}$ )

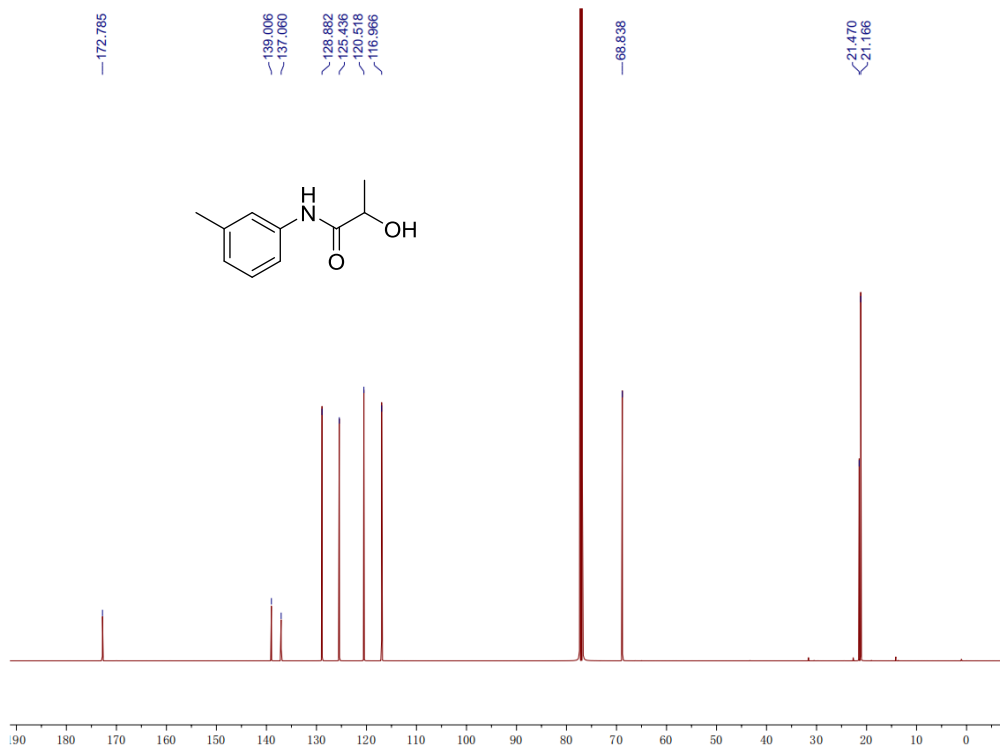

***N*-(2-Chlorophenyl)-2-hydroxypropanamide** [<sup>1</sup>H\_NMR\_400MHz\_(CDCl<sub>3</sub>:7.26 ppm)]

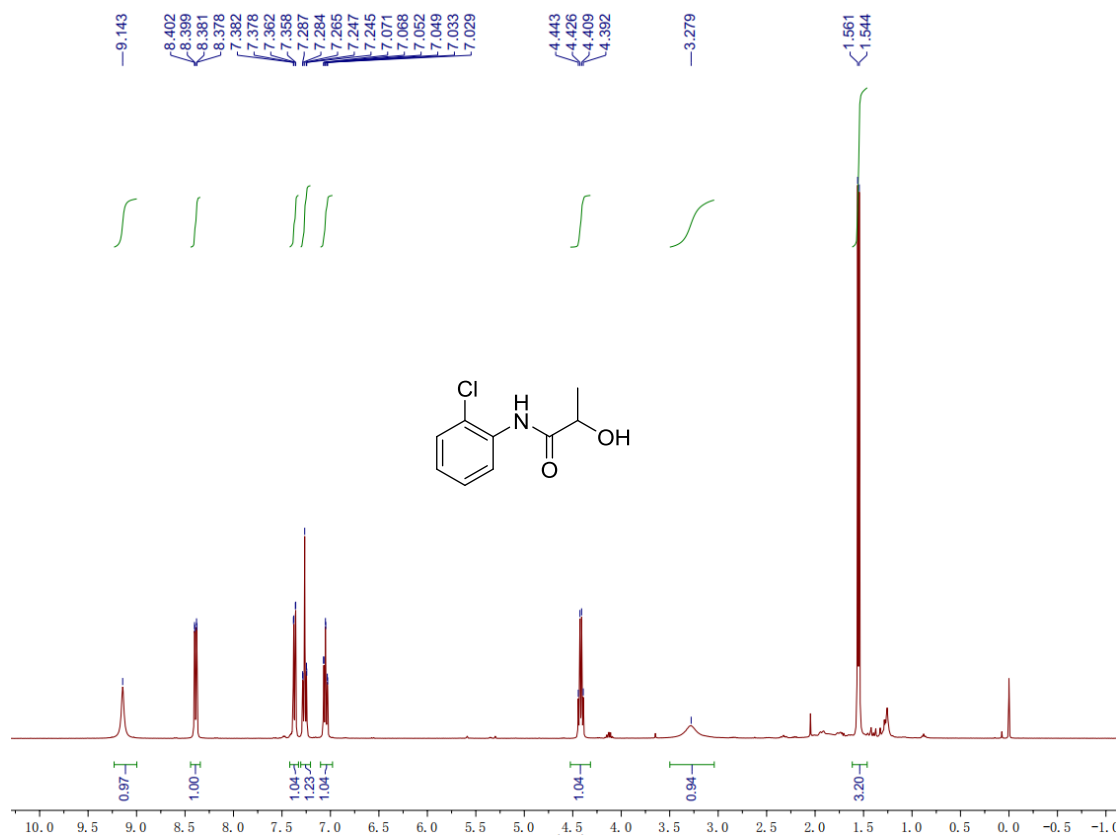

[<sup>13</sup>C\_NMR\_100MHz\_(CDCl<sub>3</sub>:77.00 ppm)]

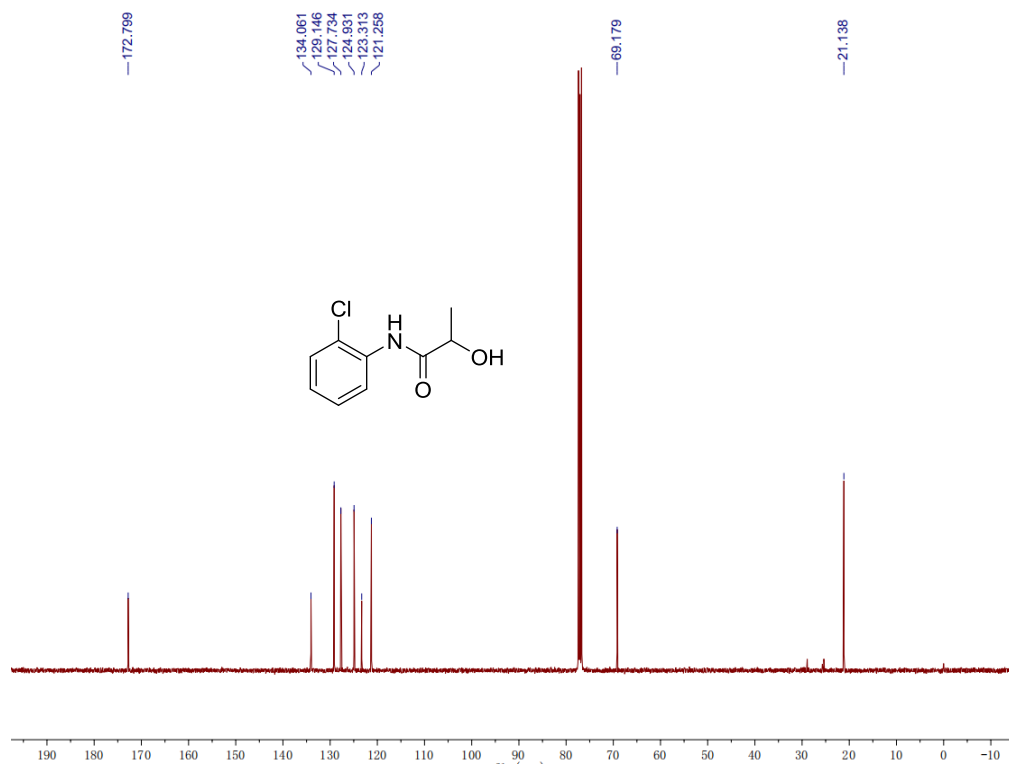

***N*-(2-Fluorophenyl)-2-hydroxypropanamide** [<sup>1</sup>H\_NMR\_400MHz\_(CDCl<sub>3</sub>:7.26 ppm)]

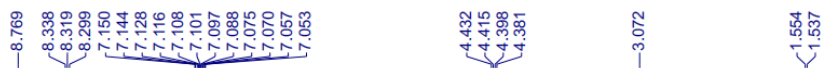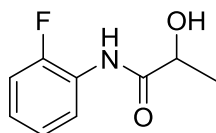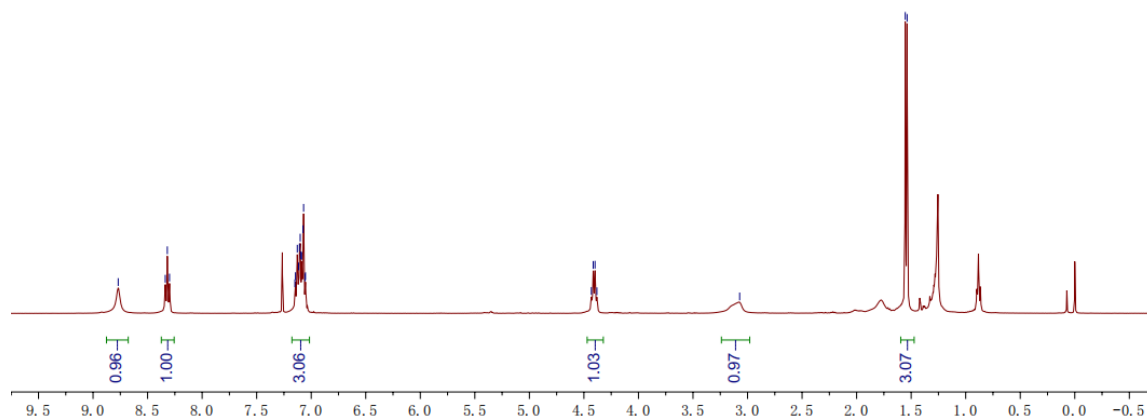

[<sup>13</sup>C\_NMR\_150MHz\_(CDCl<sub>3</sub>:77.00 ppm)]

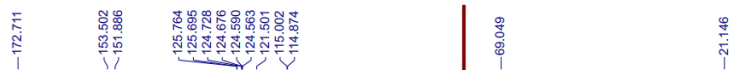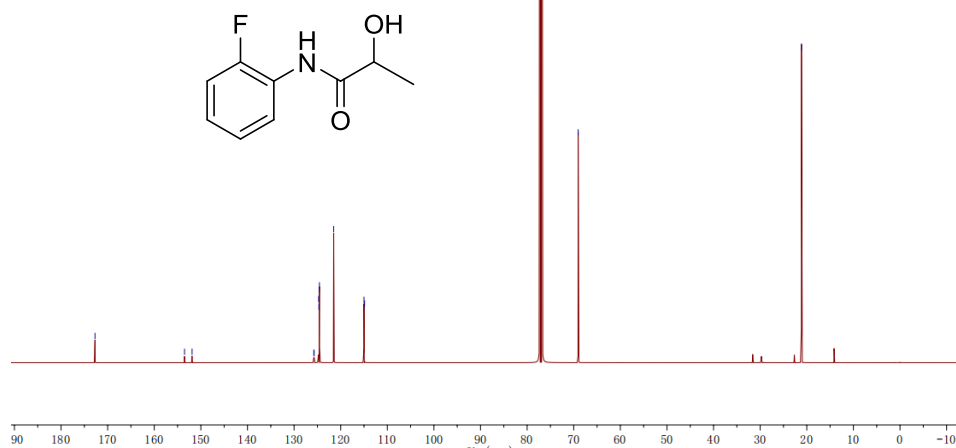



**2-Hydroxy-N-(o-tolyl)propanamide** [ $^1\text{H\_NMR\_400MHz\_}(\text{CDCl}_3:7.26 \text{ ppm})$ ]

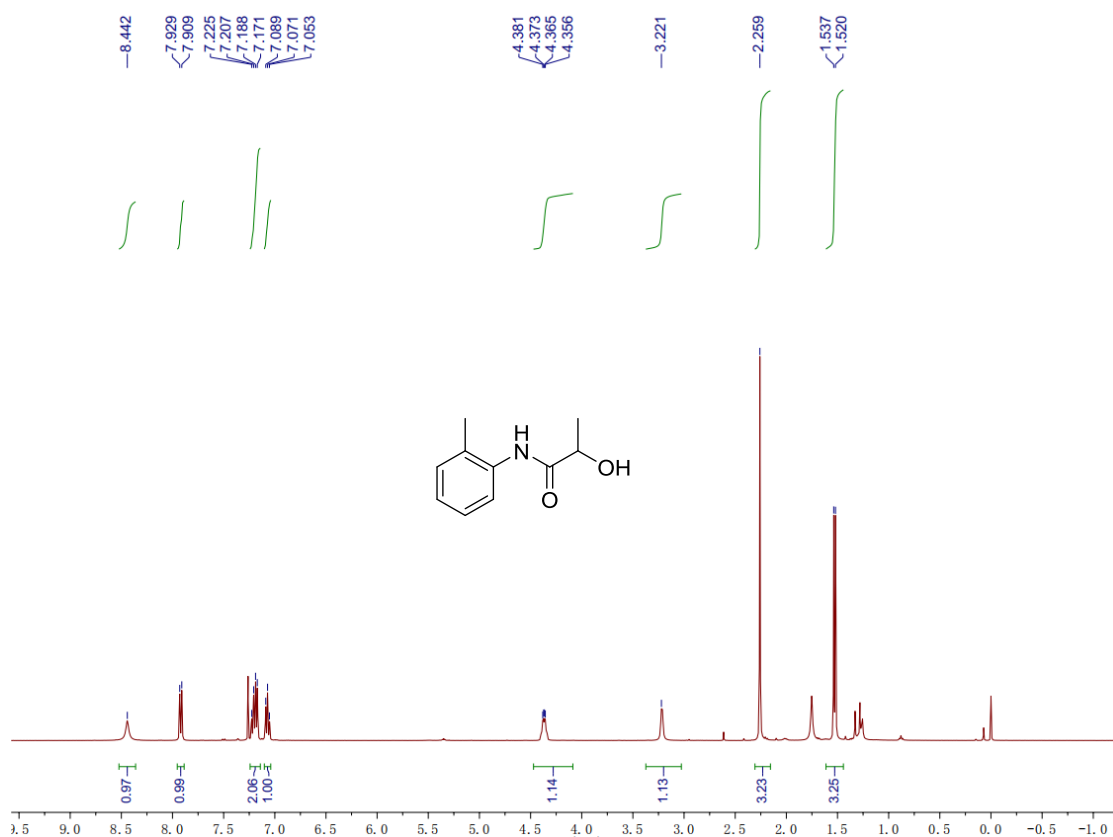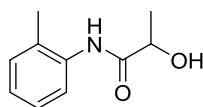

$^{13}\text{C\_NMR}$  100MHz (CDCl<sub>3</sub>:77.00 ppm)

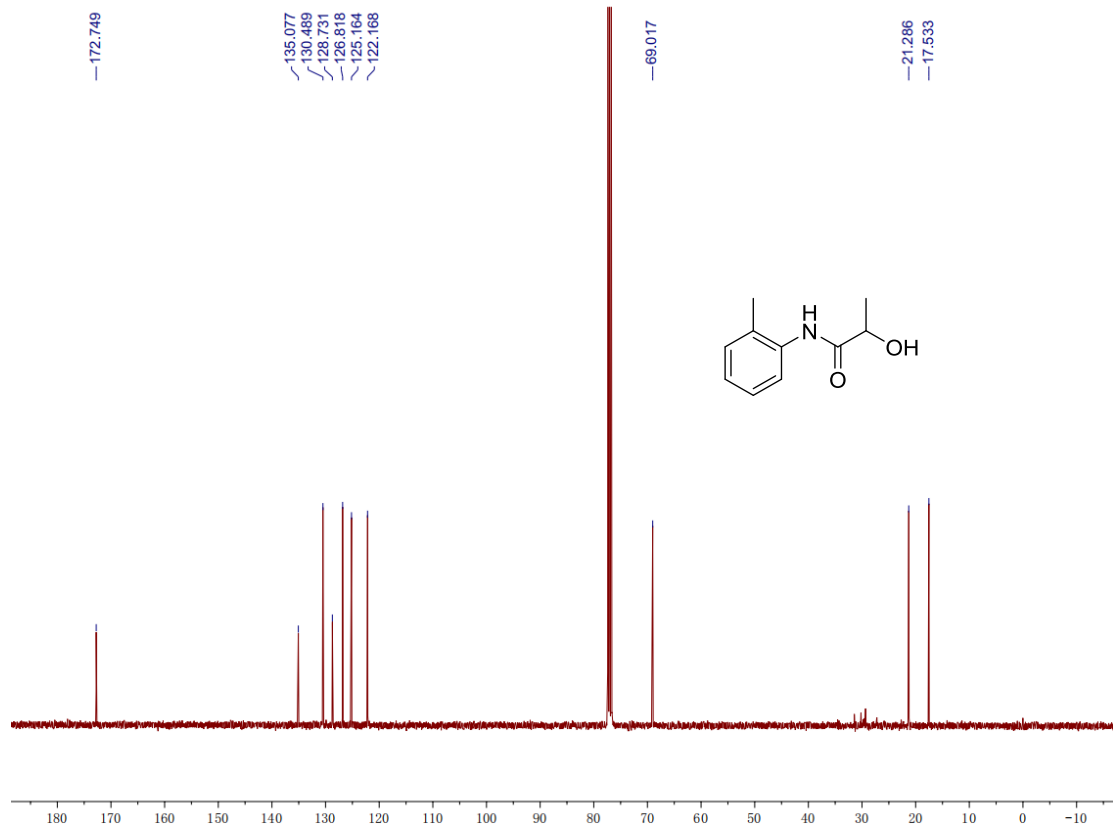

**2-Hydroxy-N-(2-methoxyphenyl)propanamide** [<sup>1</sup>H\_NMR\_400MHz\_(CDCl<sub>3</sub>:7.26 ppm)]

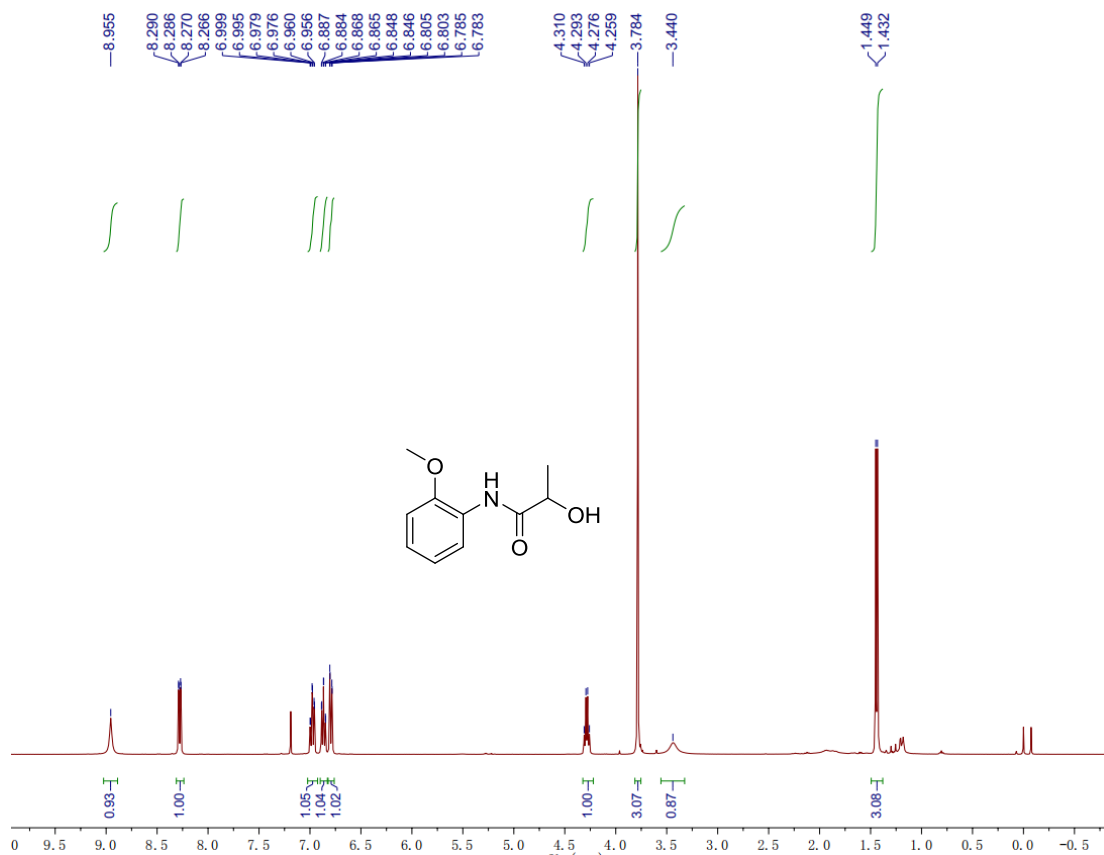

[<sup>13</sup>C\_NMR\_100MHz\_(CDCl<sub>3</sub>:77.00 ppm)]

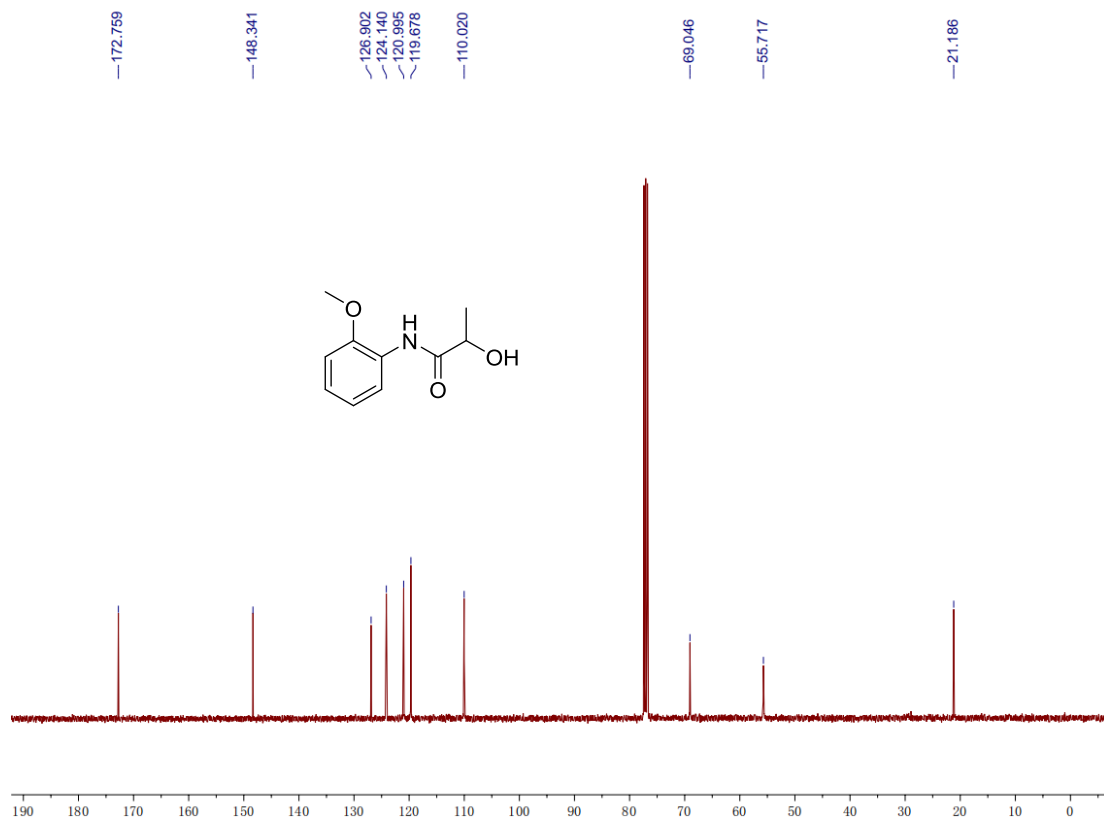

***N*-(4-Chloro-2-methylphenyl)-2-hydroxypropanamide** [<sup>1</sup>H\_NMR\_400MHz\_(CDCl<sub>3</sub>:7.26 ppm)]

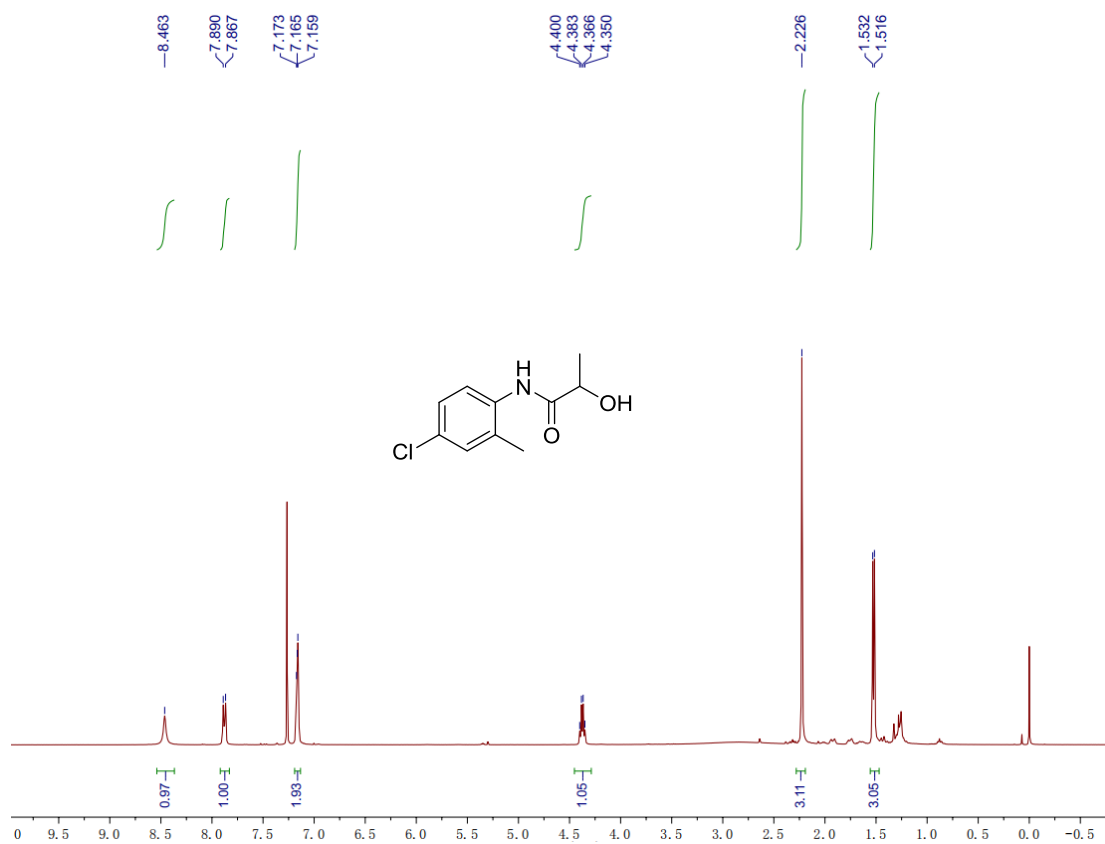

[<sup>13</sup>C\_NMR\_150MHz\_(CDCl<sub>3</sub>:77.00 ppm)]

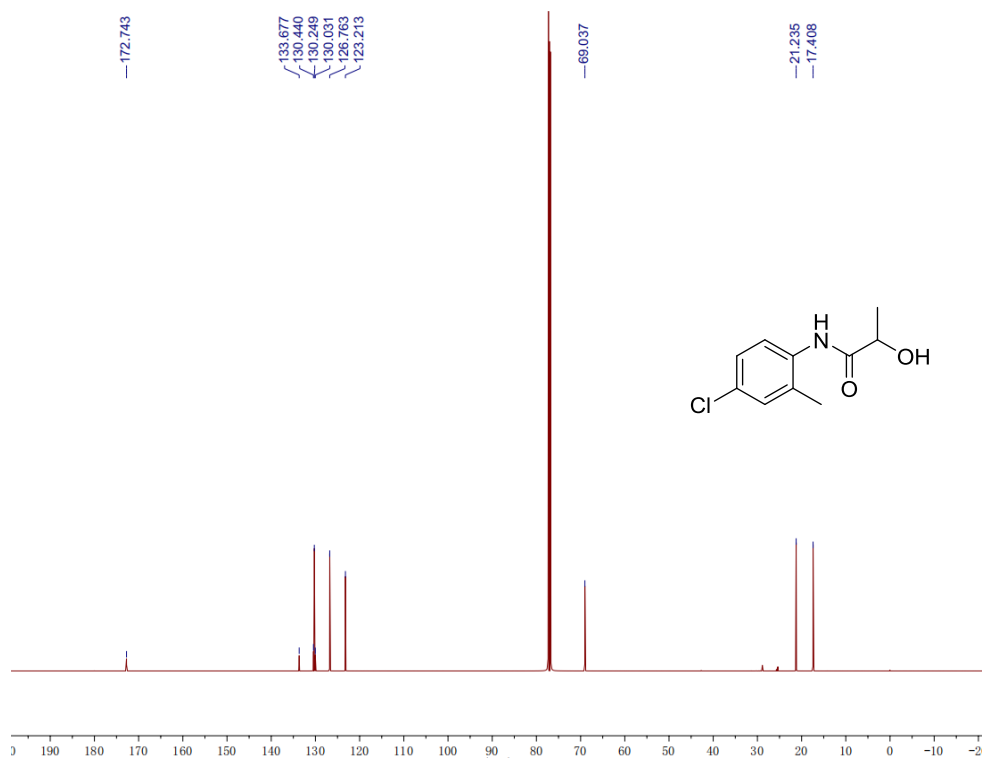

**2-Hydroxy-N-(pyridin-2-yl)propanamide** [ $^1\text{H\_NMR\_400MHz\_}(\text{CDCl}_3:7.26 \text{ ppm})$ ]

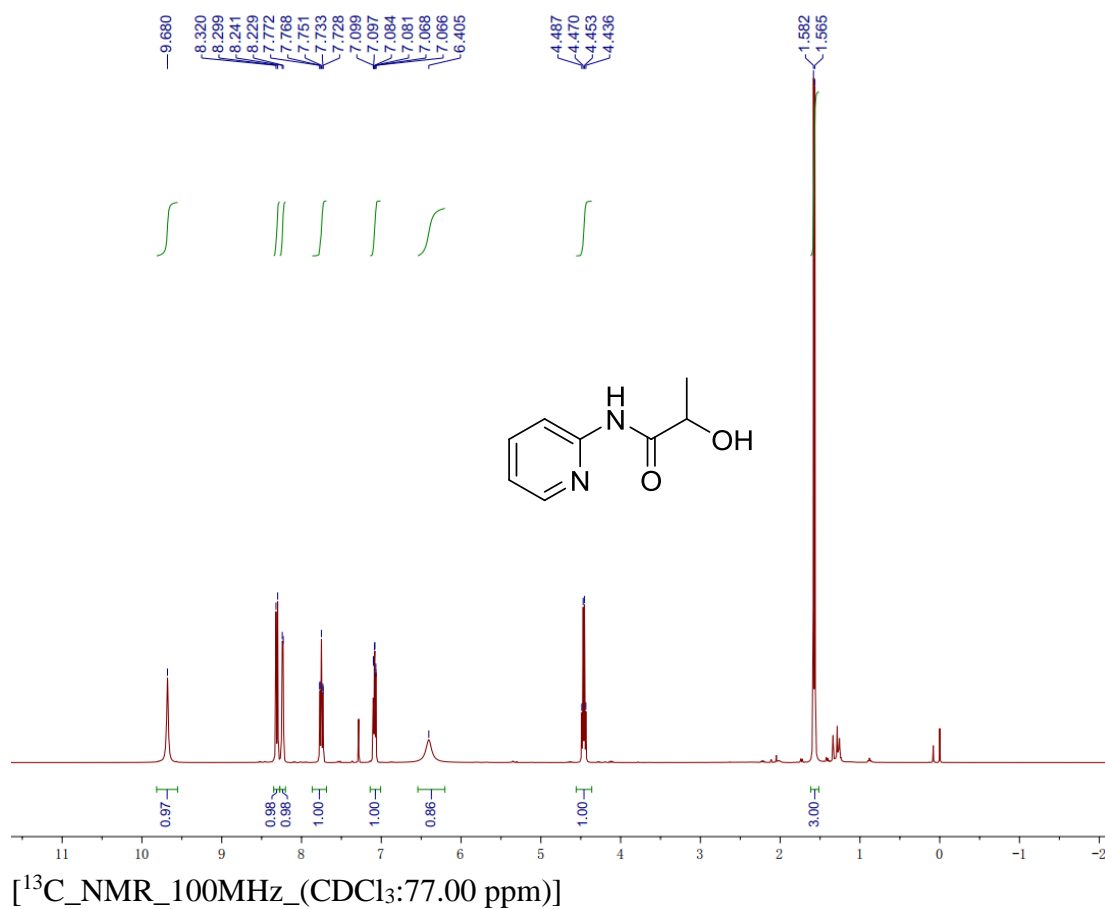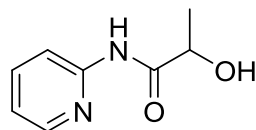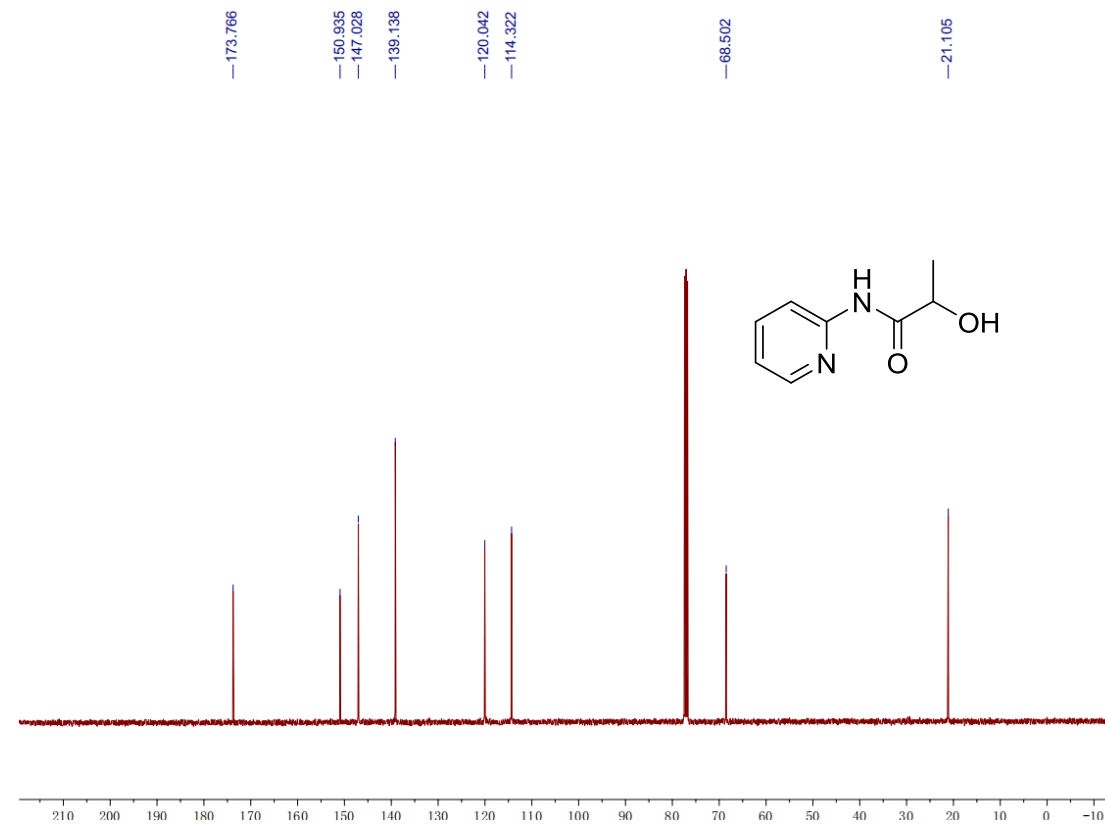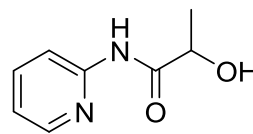

**2-Hydroxy-N-(quinolin-2-yl)propanamide** [ $^1\text{H-NMR}$ \_600MHz\_( $\text{CDCl}_3$ :7.26 ppm)]

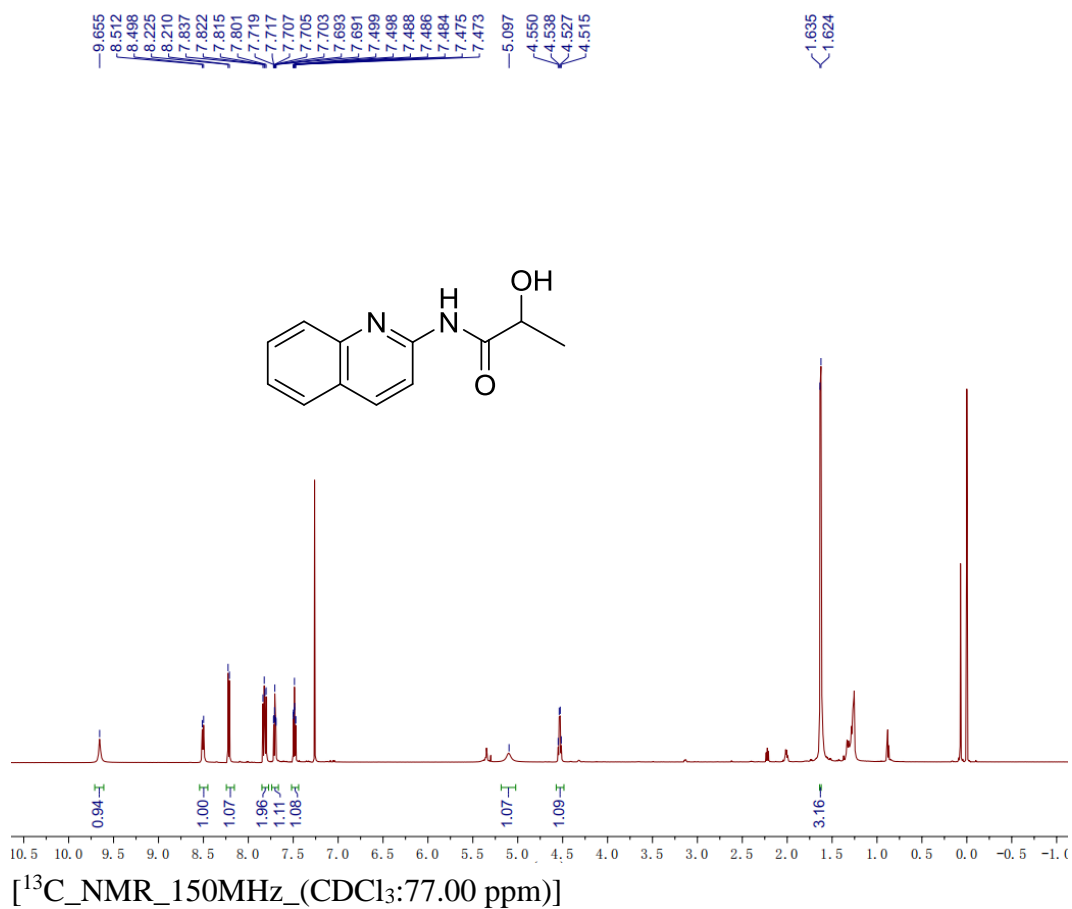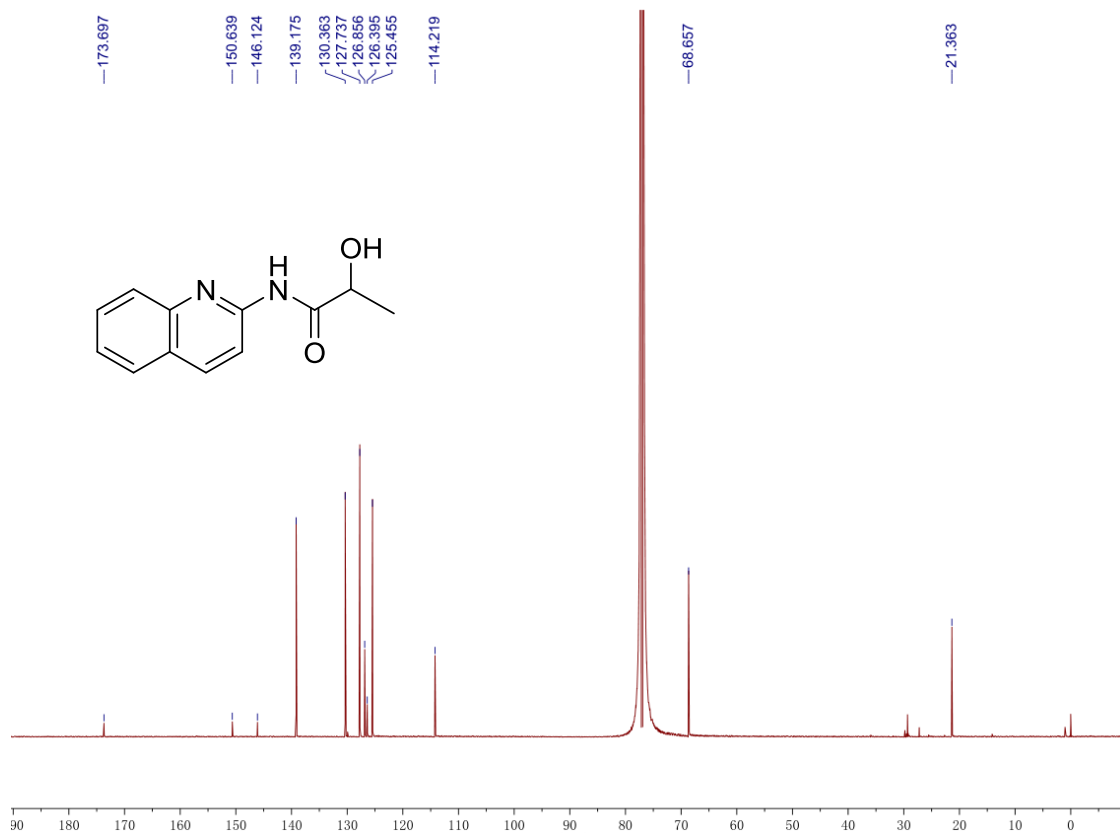

2-Hydroxy-N-(quinolin-2-yl)propanamide [<sup>1</sup>H\_NMR\_400MHz\_(CDCl<sub>3</sub>:7.26 ppm)]

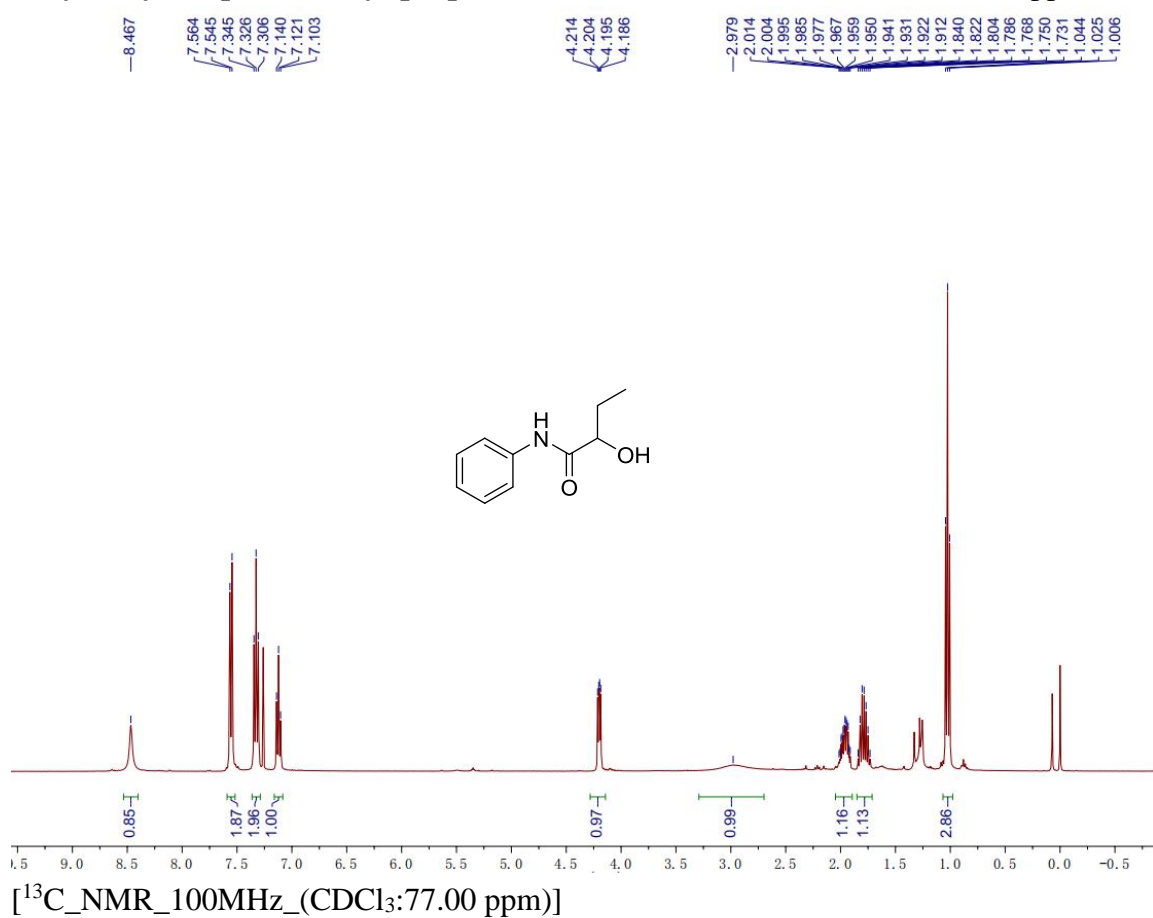

[<sup>13</sup>C\_NMR\_100MHz\_(CDCl<sub>3</sub>:77.00 ppm)]

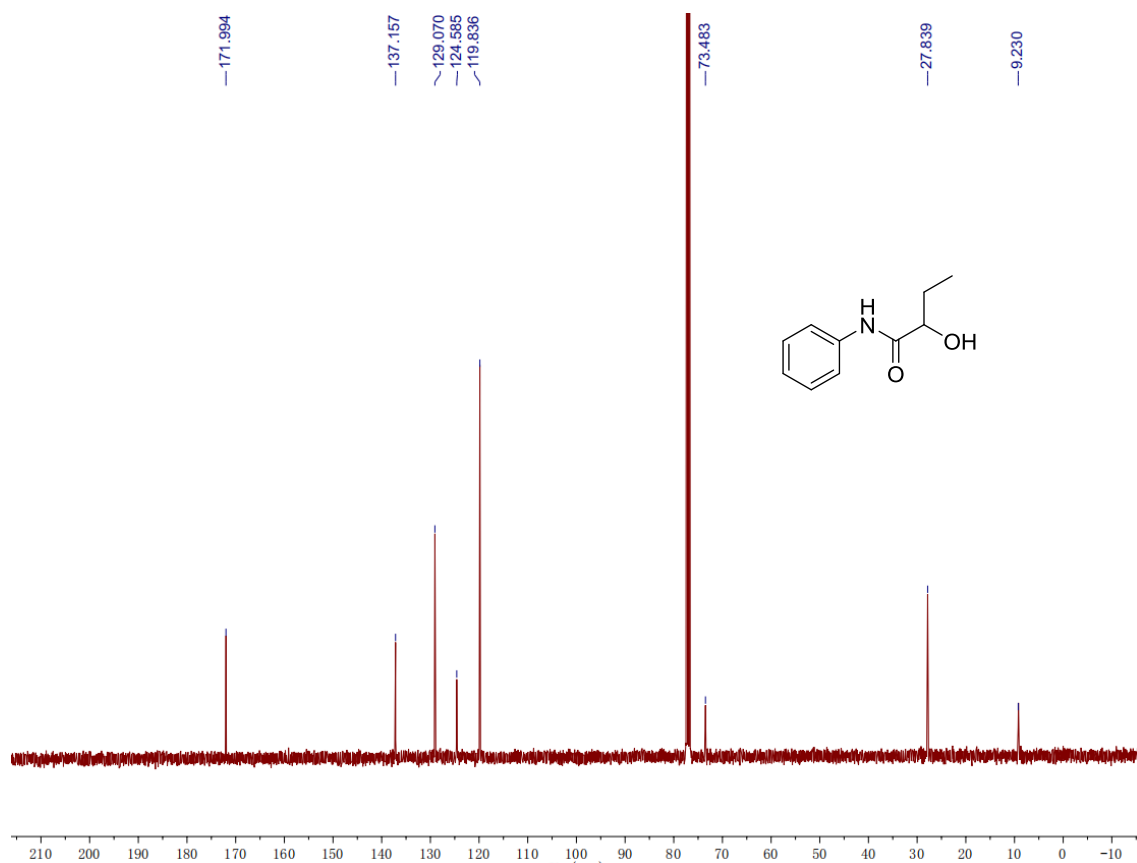

# 2-Hydroxy-N-phenylpentanamide [<sup>1</sup>H\_NMR\_400MHz\_(CDCl<sub>3</sub>:7.26 ppm)]

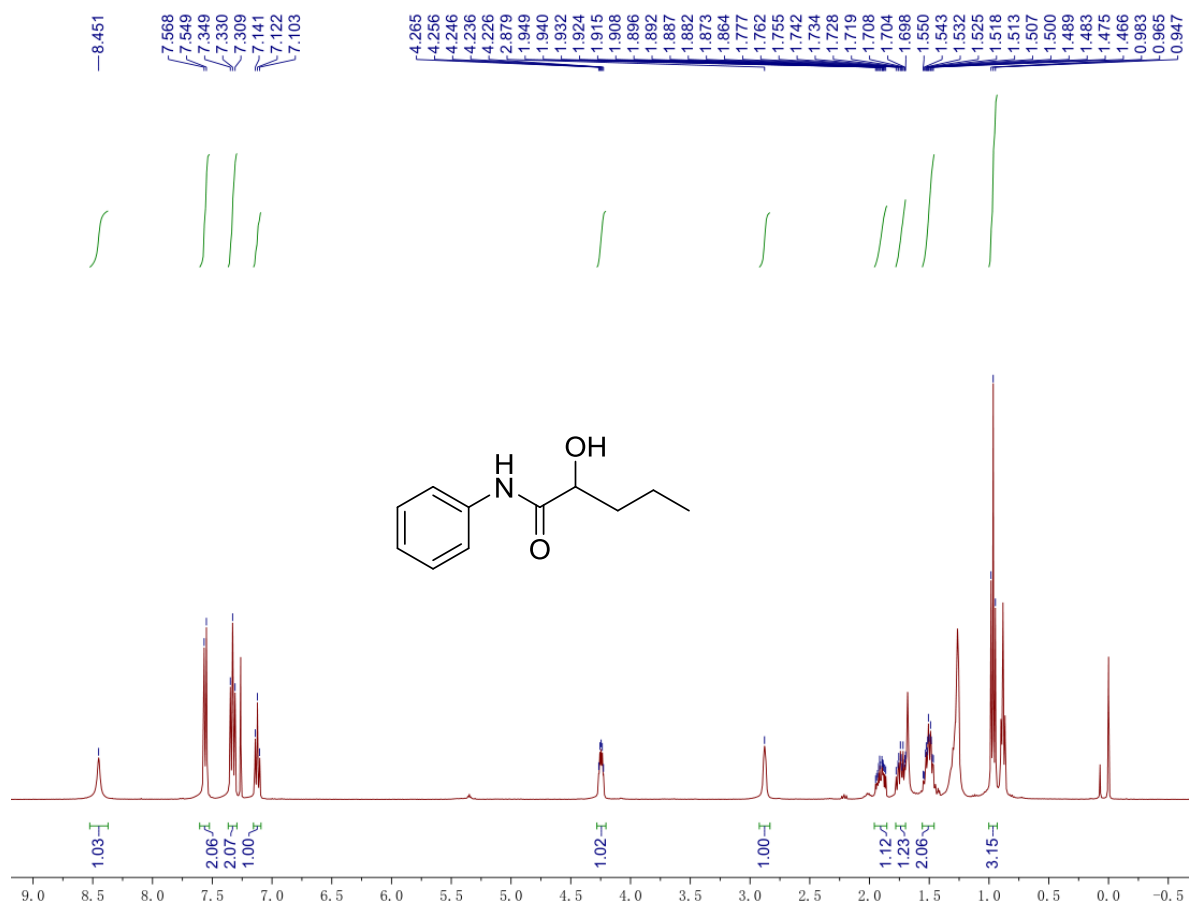

# [<sup>13</sup>C\_NMR\_150MHz\_(CDCl<sub>3</sub>:77.00 ppm)]

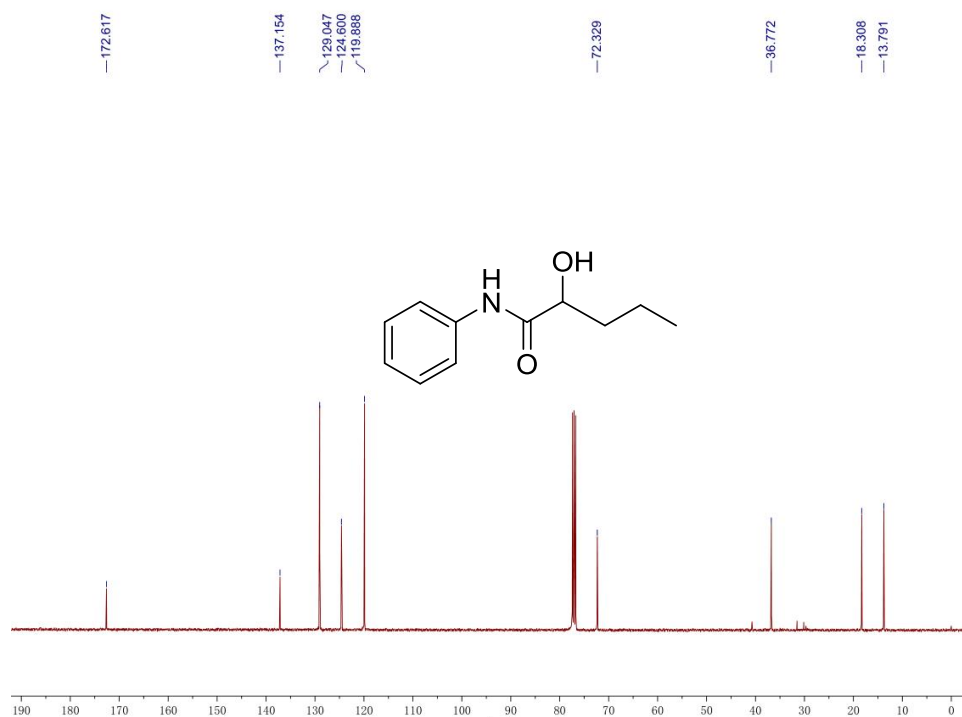

2-Hydroxy-N-phenyl 1-2,3-*d*<sub>4</sub>-propanamide [<sup>1</sup>H\_NMR\_600MHz\_(CDCl<sub>3</sub>:7.26 ppm)]

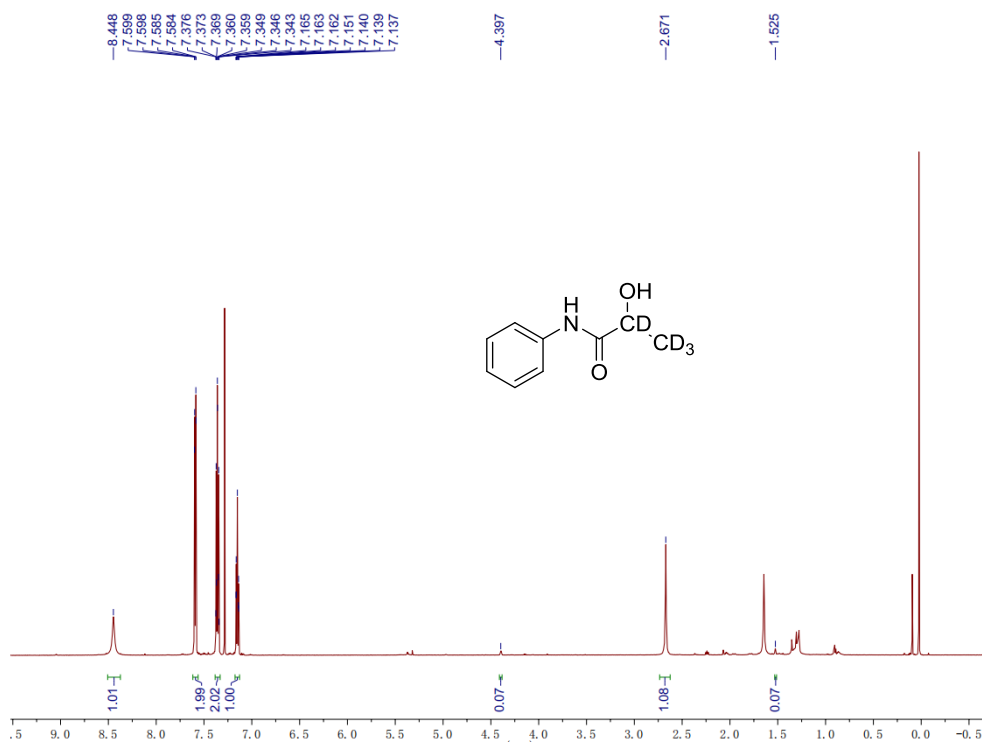

[<sup>13</sup>C\_NMR\_150MHz\_(CDCl<sub>3</sub>:77.00 ppm)]

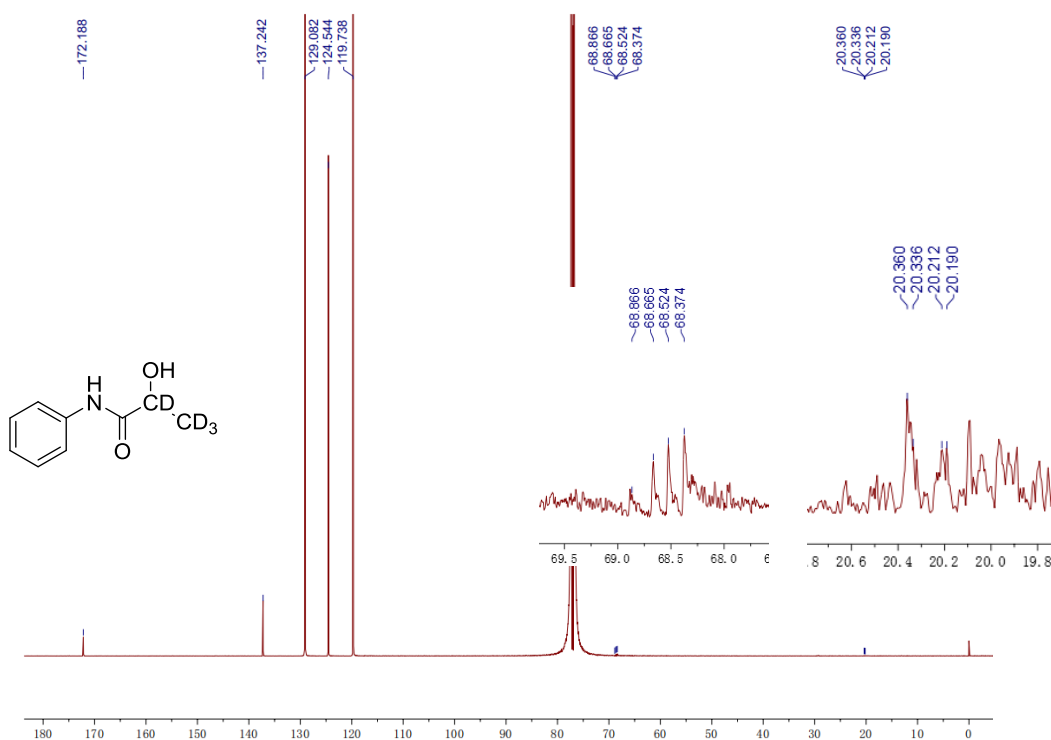



**2-Hydroxy-N-phenyl-2,3-*d*<sub>4</sub>-pentanamide** [<sup>1</sup>H\_NMR\_400MHz\_(CDCl<sub>3</sub>:7.26 ppm)]

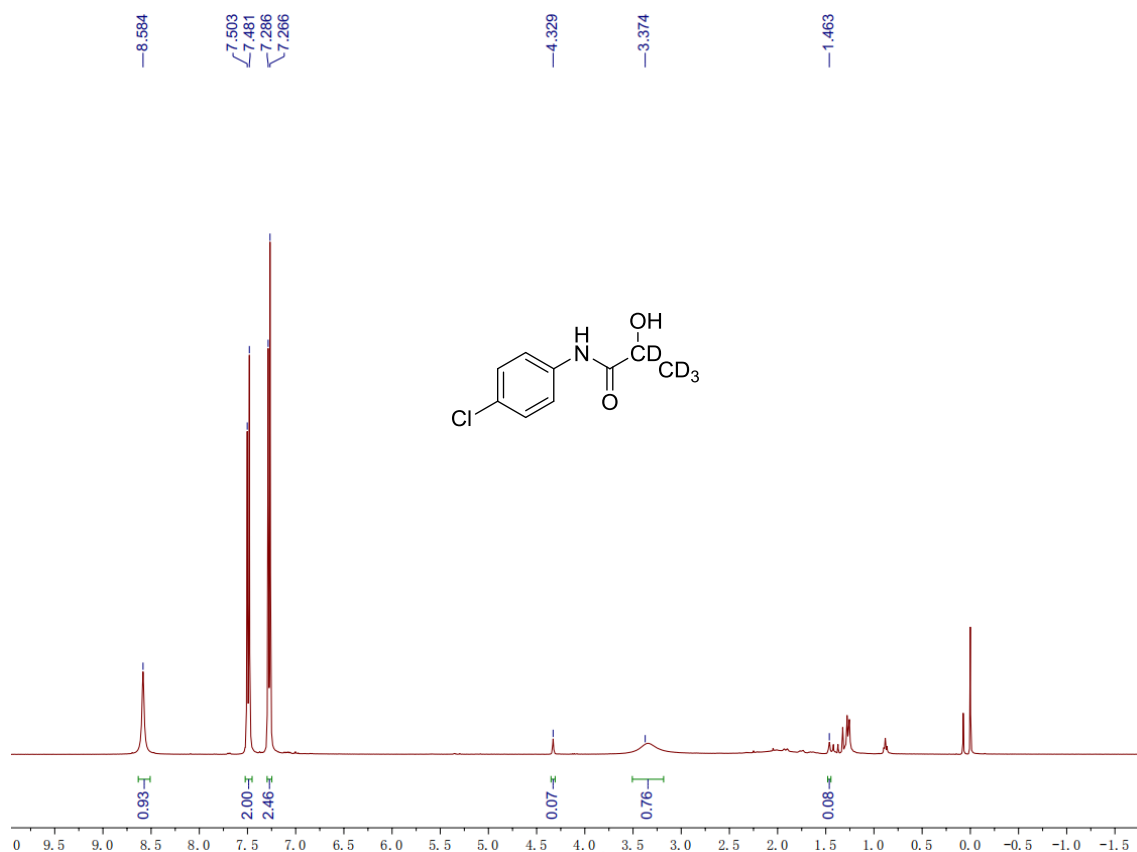

[<sup>13</sup>C\_NMR\_150MHz\_(CDCl<sub>3</sub>:77.00 ppm)]

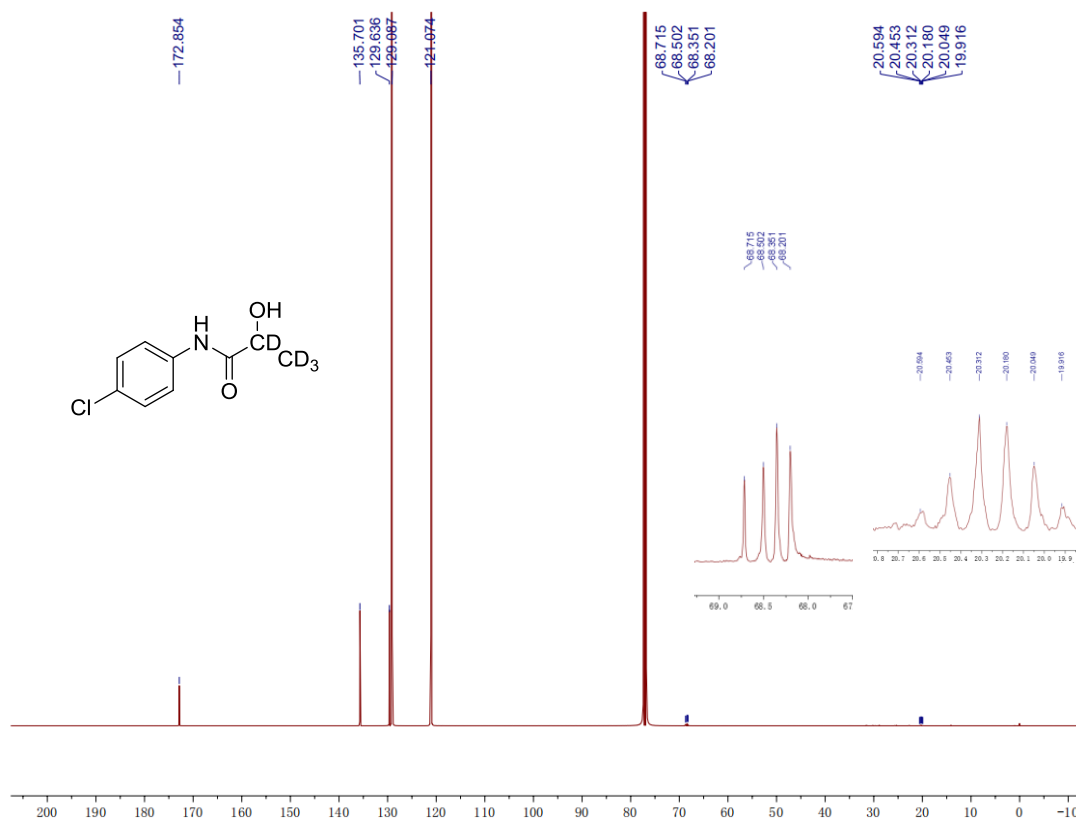

# 2-Hydroxy-N-(4-methoxyphenyl)-2,3-d<sub>4</sub>-propanamide

[<sup>1</sup>H\_NMR\_400MHz\_(CDCl<sub>3</sub>:7.26 ppm)]

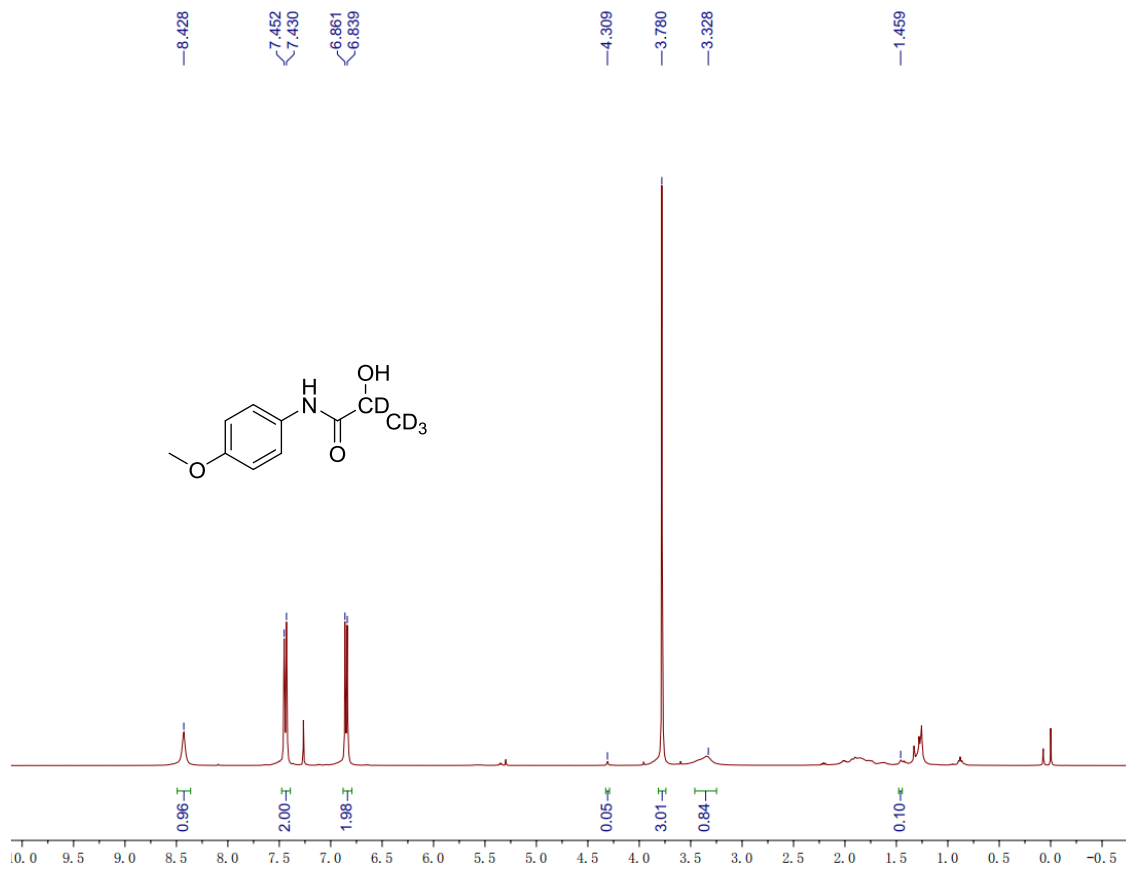

[<sup>13</sup>C\_NMR\_150MHz\_(CDCl<sub>3</sub>:77.00 ppm)]

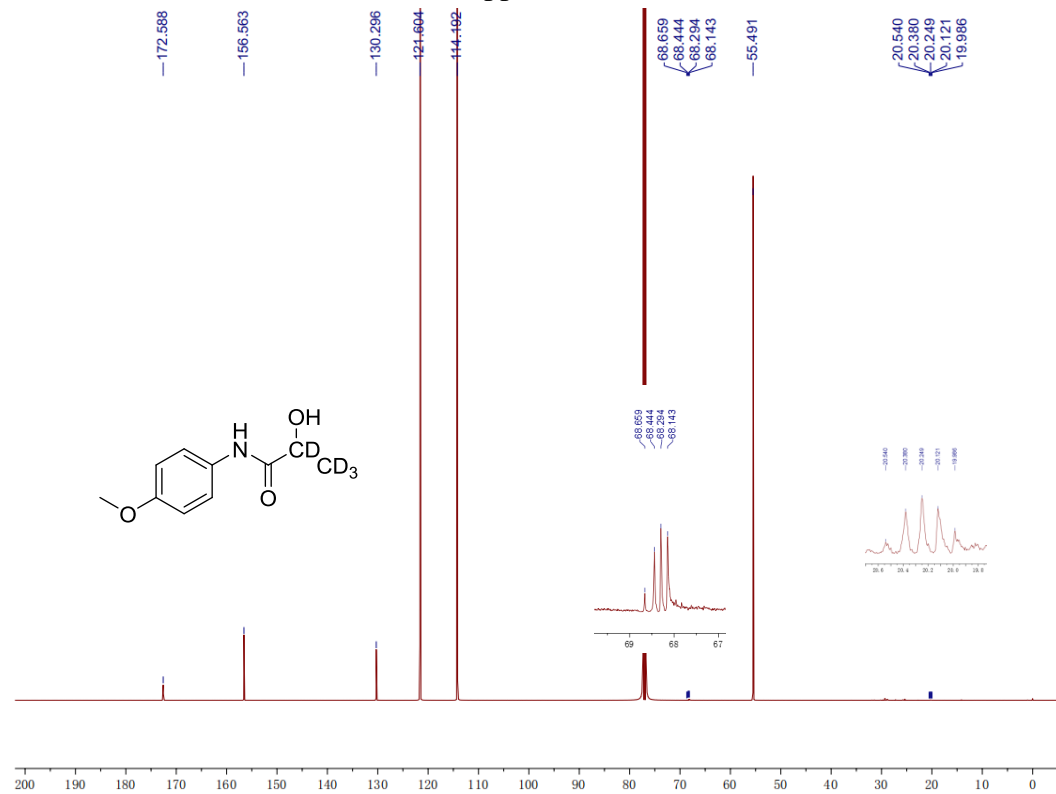

# *N*-(3-Chlorophenyl)-2-hydroxy-2,3-*d*<sub>4</sub>-propanamide

[<sup>1</sup>H\_NMR\_400MHz\_(CDCl<sub>3</sub>:7.26 ppm)]

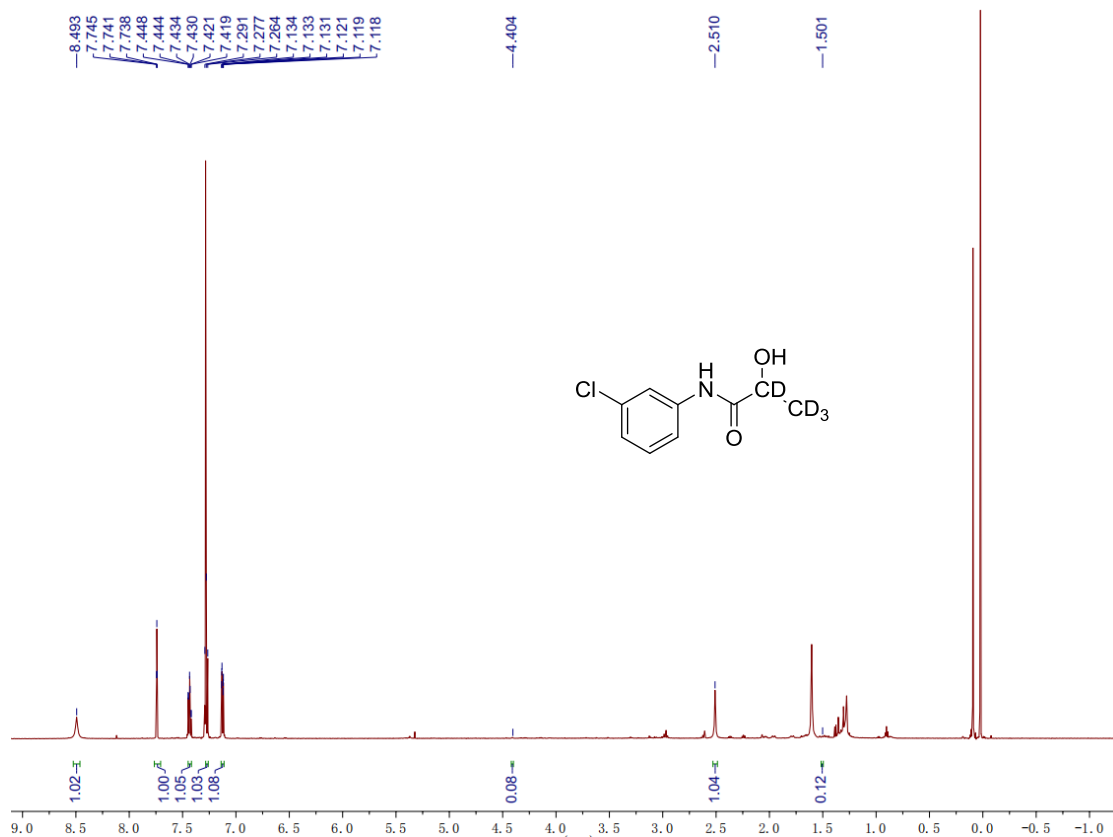

[<sup>13</sup>C\_NMR\_150MHz\_(CDCl<sub>3</sub>:77.00 ppm)]

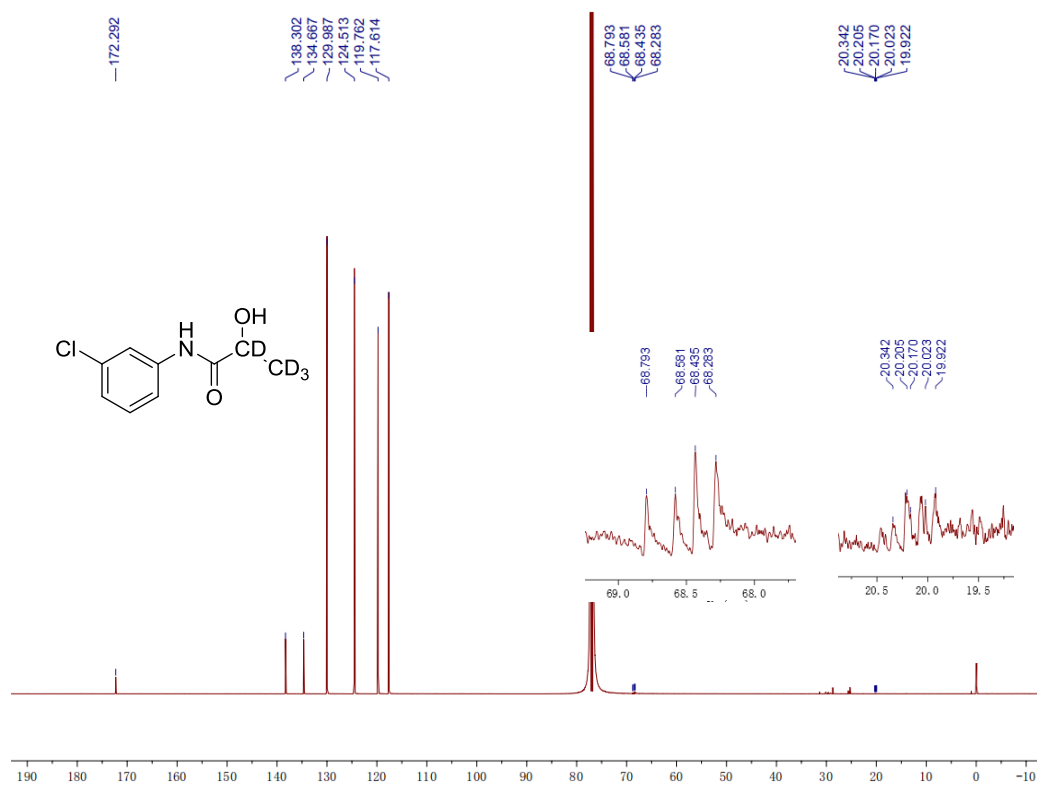

# *N*-(2-Chlorophenyl)-2-hydroxy-2,3-*d*<sub>4</sub>-propanamide

[<sup>1</sup>H\_NMR\_400MHz\_(CDCl<sub>3</sub>:7.26 ppm)]

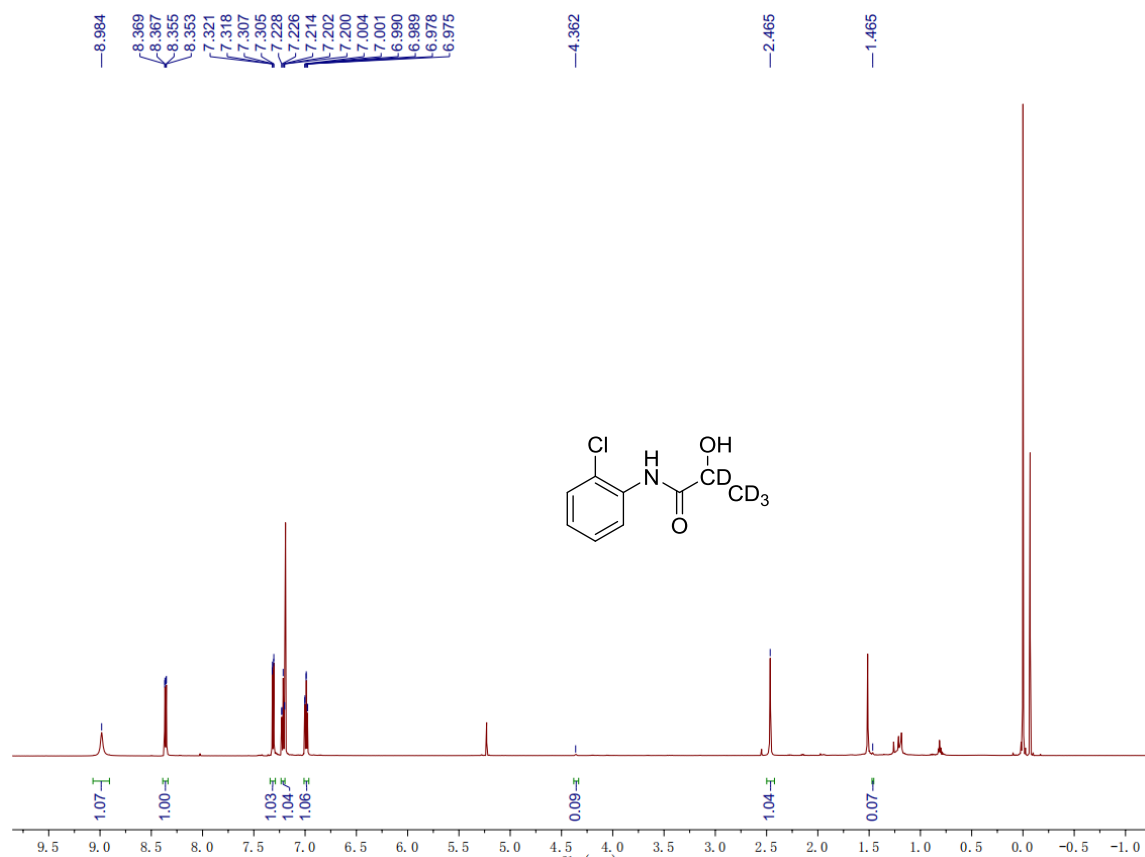

[<sup>13</sup>C\_NMR\_150MHz\_(CDCl<sub>3</sub>:77.00 ppm)]

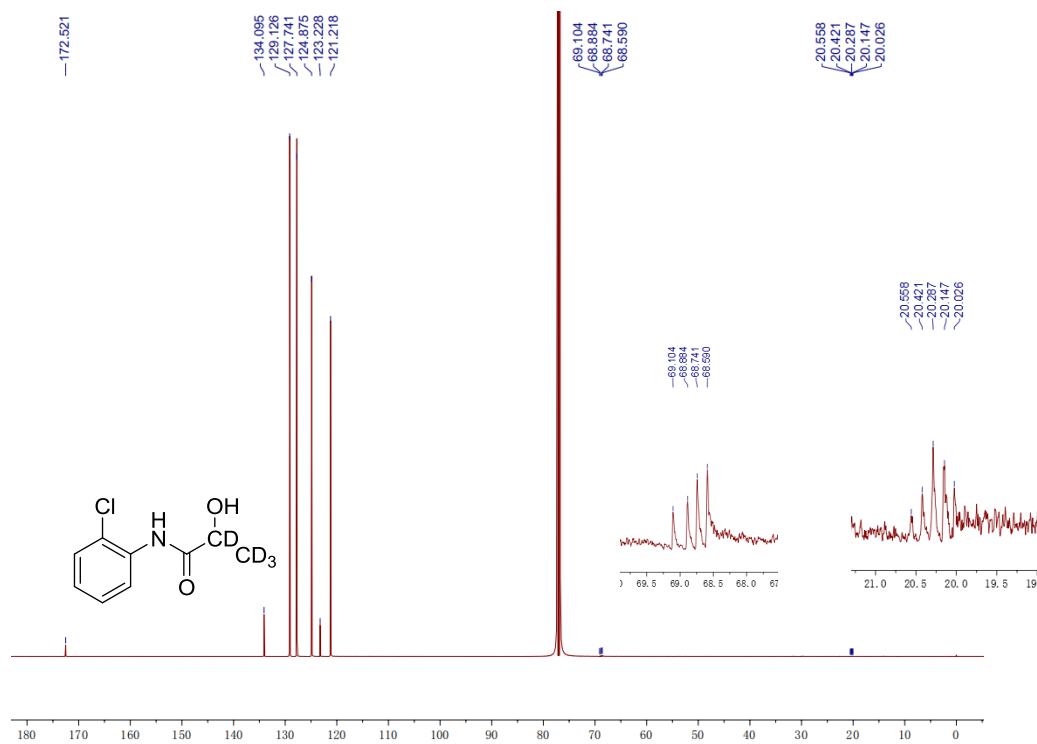

# 2-Hydroxy-N-(2-methoxyphenyl)-2,3-*d*<sub>4</sub>-propanamide

[<sup>1</sup>H\_NMR\_400MHz\_(CDCl<sub>3</sub>:7.26 ppm)]

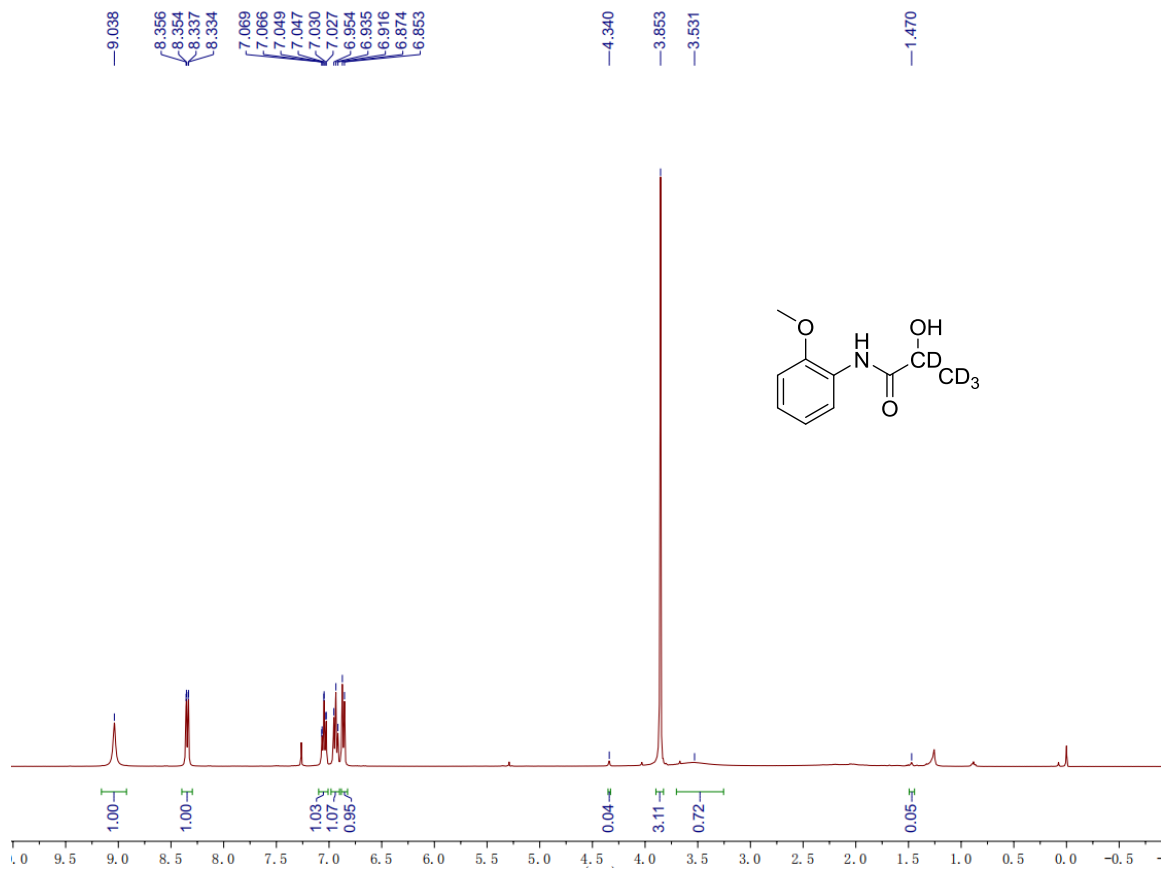

[<sup>13</sup>C\_NMR\_150MHz\_(CDCl<sub>3</sub>:77.00 ppm)]

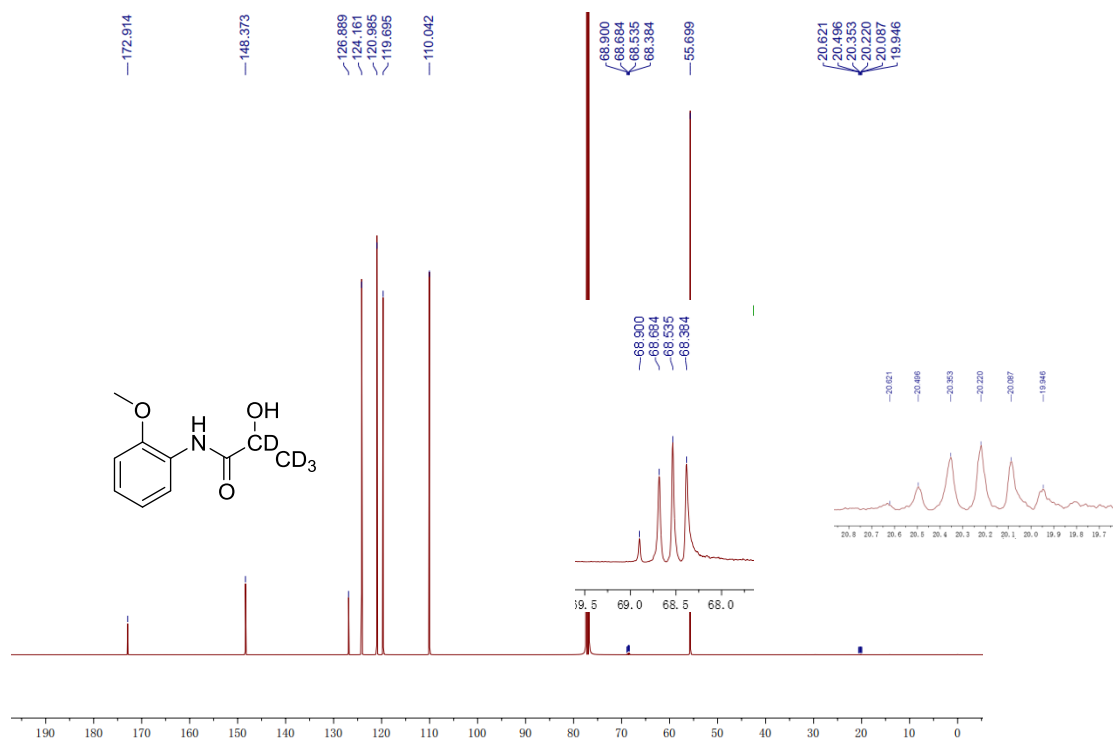

**2-Hydroxy-N-phenyl-2,3-*d*<sub>3</sub>-butanamide** [<sup>1</sup>H\_NMR\_400MHz\_(CDCl<sub>3</sub>:7.26 ppm)]

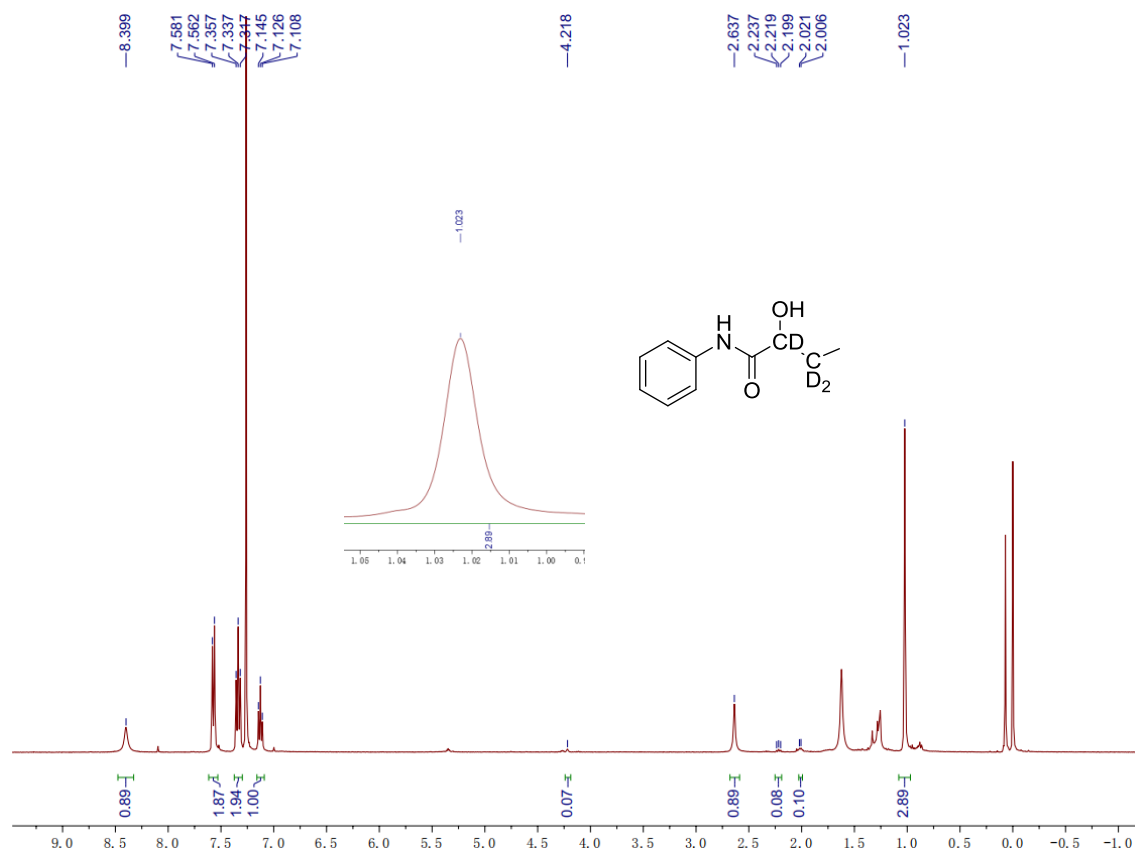

[<sup>13</sup>C\_NMR\_150MHz\_(CDCl<sub>3</sub>:77.00 ppm)]

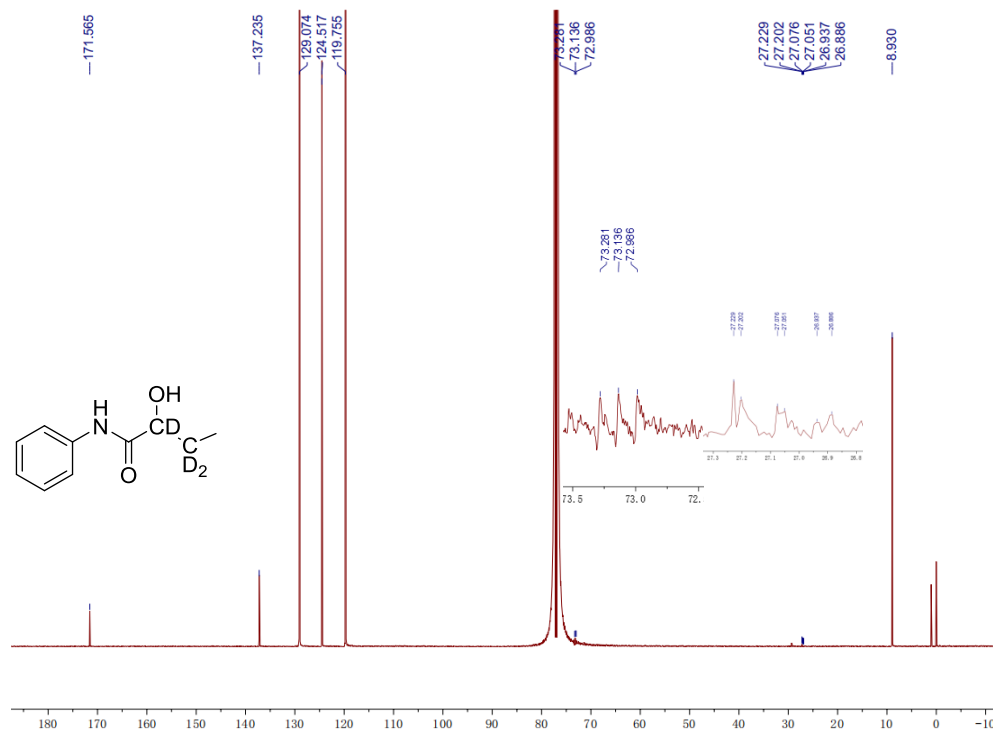

Supplement: d1qo00530h1.pdf [file d1qo00530h1.pdf]
